# Supplementary material for: Reduced Placental Transfer of Antibodies Against a Wide Range of Microbial and Vaccine Antigens in HIV-Infected Women in Mozambique
Source: Front Immunol. 2021 Mar 3;12:614246. doi: 10.3389/fimmu.2021.614246 (PMC7965965; doi:10.3389/fimmu.2021.614246)
Supplement: Supplementary Material 1 — Cord blood levels and placental transfer of antibodies univariable models. [file Data_Sheet_1.CSV]

isotype	vars_x	vars_y	analyte	analyte_block	beta	ci_lower	ci_upper	raw_pval	aic	bic	adj_r_squared	std_error	raw_pval_text	raw_pval_signif	adj_pval	adj_pval_text	adj_pval_signif
IgG3	log10_mother	log10_cb	Cp17	other_antigens	0.995837475185202	0.980454426985913	1.01122052338449	5.89356251705842e-258	-1687.17233222831	-1676.12159292629	0.982269173095829	0.0078161073521687	p < 0.0001	***	8.25098752388179e-257	p < 0.0001	***
IgG3	log10_mother	log10_cb	Diphteria_toxin	vaccine_antigens	0.961115951587645	0.941623024677335	0.980608878497954	1.78039501563542e-221	-1296.62135092112	-1285.62207085679	0.97032494124381	0.00990361343446088	p < 0.0001	***	1.24627651094479e-220	p < 0.0001	***
IgG4	log10_mother	log10_cb	MSP1_42_3D7	exposure_antigen	0.940417526990221	0.916254532088852	0.96458052189159	1.0196920352853e-191	-1306.26285704993	-1295.29488161747	0.953679238614843	0.0122757479137071	p < 0.0001	***	1.42756884939943e-190	p < 0.0001	***
IgG2	log10_mother	log10_cb	MSP1_42_3D7	exposure_antigen	0.934686466567169	0.908207080313925	0.961165852820413	1.52479865002357e-181	-721.706554923703	-710.707274859365	0.943684681421691	0.0134531672252469	p < 0.0001	***	2.13471811003299e-180	p < 0.0001	***
IgG	log10_mother	log10_cb	OSP	other_antigens	0.977691963620742	0.949820607716366	1.00556331952512	3.17417475042765e-181	-1661.06466933477	-1650.05502656583	0.942828475365308	0.0141605821692481	p < 0.0001	***	4.4438446505987e-180	p < 0.0001	***
IgG2	log10_mother	log10_cb	HiB	vaccine_antigens	0.941105966245565	0.911384507009056	0.970827425482074	5.69311159923061e-170	-1147.36025039522	-1136.32998898841	0.930280652377583	0.0151010024504588	p < 0.0001	***	3.98517811946143e-169	p < 0.0001	***
IgG3	log10_mother	log10_cb	RSV	other_antigens	0.965415858920007	0.932238919749511	0.998592798090503	8.12729481353226e-161	-637.832263625051	-626.781524323035	0.917970722374979	0.016857160870429	p < 0.0001	***	3.79273757964839e-160	p < 0.0001	***
IgG3	log10_mother	log10_cb	Rotavirus	other_antigens	0.902545750335369	0.871025780137489	0.934065720533248	6.07448760139249e-159	-945.640933999318	-934.590194697302	0.91551150595172	0.0160152570291744	p < 0.0001	***	2.12607066048737e-158	p < 0.0001	***
IgG	log10_mother	log10_cb	HiB	vaccine_antigens	0.91284585248843	0.881090265437838	0.944601439539022	4.90898228216816e-158	-1437.4952126388	-1426.48556986986	0.917172250968546	0.0161340410314236	p < 0.0001	***	3.43628759751771e-157	p < 0.0001	***
IgG	log10_mother	log10_cb	Pertussis_toxin	vaccine_antigens	0.950289992613025	0.917079393698299	0.98350059152775	1.7419046614226e-156	-1384.04877497839	-1373.07032833111	0.917272503218897	0.0168725385074694	p < 0.0001	***	8.12888841997212e-156	p < 0.0001	***
IgG	log10_mother	log10_cb	MSP1_42_3D7	exposure_antigen	0.92122422574309	0.886956807327795	0.955491644158386	1.04649590908005e-150	-1185.77686317851	-1174.756893377	0.906108920235211	0.0174104798140805	p < 0.0001	***	3.66273568178019e-150	p < 0.0001	***
IgG	log10_mother	log10_cb	HepB	vaccine_antigens	0.94011415668898	0.903969586116137	0.976258727261824	1.68513941159303e-144	-1225.26916871695	-1214.33282802402	0.902836410527636	0.0183620187369424	p < 0.0001	***	4.71839035246049e-144	p < 0.0001	***
IgG1	log10_mother	log10_cb	Pertussis_toxin	vaccine_antigens	0.910081424985221	0.873643488923084	0.946519361047357	2.91657639716637e-143	-1195.67947476106	-1184.62873545905	0.89181535952758	0.0185140692705034	p < 0.0001	***	4.08320695603292e-142	p < 0.0001	***
IgG1	log10_mother	log10_cb	OSP	other_antigens	1.01564218130822	0.974227951737141	1.0570564108793	3.38004366069801e-141	-1096.00778524582	-1084.95704594381	0.888237266108867	0.0210425177143935	p < 0.0001	***	2.36603056248861e-140	p < 0.0001	***
IgG	log10_mother	log10_cb	Diphteria_toxin	vaccine_antigens	0.969172870472955	0.930133726016306	1.0082120149296	2.19190149668128e-139	-1204.77924560873	-1193.8429049158	0.894345253512167	0.0198325084688038	p < 0.0001	***	5.11443682558965e-139	p < 0.0001	***
IgG2	log10_mother	log10_cb	HepB	vaccine_antigens	0.876620555846054	0.842049016067785	0.911192095624323	2.35789928340873e-138	-878.40119787934	-867.583791680452	0.901890067204475	0.0175597991429572	p < 0.0001	***	1.10035299892407e-137	p < 0.0001	***
IgG	log10_mother	log10_cb	Shiga_toxin	other_antigens	0.930183303149793	0.891064879581169	0.969301726718418	3.48204837757442e-137	-1471.46768913701	-1460.43742773021	0.882675360351707	0.019875451116554	p < 0.0001	***	6.96409675514883e-137	p < 0.0001	***
IgG1	log10_mother	log10_cb	MSP1_42_3D7	exposure_antigen	0.928454632788118	0.889073392081412	0.967835873494824	1.67017774625137e-136	-1017.32387896661	-1006.28336113956	0.880527305890908	0.02000927247714	p < 0.0001	***	7.79416281583971e-136	p < 0.0001	***
IgG1	log10_mother	log10_cb	HiB	vaccine_antigens	1.09216816339734	1.04551039307489	1.13882593371978	5.64207916159211e-136	-805.576581791536	-794.52584248952	0.878646663945567	0.0237067541444702	p < 0.0001	***	1.97472770655724e-135	p < 0.0001	***
IgG2	log10_mother	log10_cb	Shiga_toxin	other_antigens	0.969437809036966	0.92672054183156	1.01215507624237	9.21436527983646e-132	-987.119645980611	-976.099676179097	0.873037785403931	0.021703651829822	p < 0.0001	***	3.22502784794276e-131	p < 0.0001	***
IgG1	log10_mother	log10_cb	Shiga_toxin	other_antigens	0.976650066032557	0.932990936735192	1.02030919532992	6.06228877604542e-131	-1531.92696610533	-1520.87622680331	0.868630325940224	0.022183148428684	p < 0.0001	***	1.69744085729272e-130	p < 0.0001	***
IgG2	log10_mother	log10_cb	Pertussis_toxin	vaccine_antigens	0.891618929401414	0.852444984812509	0.93079287399032	8.87777139458698e-131	-912.159196354902	-901.191220922442	0.87560574017684	0.0199018983582901	p < 0.0001	***	2.48577599048436e-130	p < 0.0001	***
IgG3	log10_mother	log10_cb	MSP1_42_3D7	exposure_antigen	0.894621729740814	0.853151468372762	0.936091991108866	5.82303748951799e-127	-995.282945949212	-984.232206647196	0.860119190910659	0.0210709873996353	p < 0.0001	***	1.63045049706504e-126	p < 0.0001	***
IgG1	log10_mother	log10_cb	Measles	vaccine_antigens	0.904239530949161	0.860554842520607	0.947924219377715	1.78464242867165e-122	-1056.03832607451	-1044.98758677249	0.84986937397529	0.0221961349909448	p < 0.0001	***	4.16416566690052e-122	p < 0.0001	***
IgG1	log10_mother	log10_cb	HepB	vaccine_antigens	1.03109325324525	0.981807912118852	1.08037859437165	9.12641769856444e-122	-677.568676136712	-666.600700704253	0.856043602883367	0.0250388838791848	p < 0.0001	***	1.82528353971289e-121	p < 0.0001	***
IgG4	log10_mother	log10_cb	Tetanus_toxin	vaccine_antigens	0.918580623838059	0.874009258349425	0.963151989326693	7.18137098699086e-121	-285.683992307917	-274.684712243579	0.850967774889663	0.0226450125256484	p < 0.0001	***	5.0269596908936e-120	p < 0.0001	***
IgG1	log10_mother	log10_cb	Diphteria_toxin	vaccine_antigens	0.94145732860414	0.895881232885377	0.987033424322904	1.1754684073893e-120	-989.195924616552	-978.217477969273	0.852438729644984	0.0231547895901988	p < 0.0001	***	2.05706971293128e-120	p < 0.0001	***
IgG	log10_mother	log10_cb	Cp17	other_antigens	0.943064986179123	0.89652823010573	0.989601742252517	4.37126337140262e-119	-1232.78649269837	-1221.78721263404	0.846641656934666	0.0236435525955286	p < 0.0001	***	7.64971089995458e-119	p < 0.0001	***
IgG2	log10_mother	log10_cb	VSP5	other_antigens	0.877402079037387	0.833272891531123	0.921531266543651	1.20986296870703e-116	-570.796627850994	-559.818181203715	0.842560785562236	0.0224196925028245	p < 0.0001	***	2.82301359364973e-116	p < 0.0001	***
IgG2	log10_mother	log10_cb	Measles	vaccine_antigens	0.903681282679437	0.858215588750429	0.949146976608445	5.93556101154048e-116	-779.04568133283	-768.098758618347	0.843880755609258	0.0230976524361778	p < 0.0001	***	1.1871122023081e-115	p < 0.0001	***
IgG4	log10_mother	log10_cb	Pneumo	other_antigens	0.933887729967502	0.886668220975346	0.981107238959657	1.9379579634847e-115	-580.408996150765	-569.462073436281	0.842565964957395	0.0239886321456079	p < 0.0001	***	9.04380382959525e-115	p < 0.0001	***
IgG3	log10_mother	log10_cb	Measles	vaccine_antigens	0.909233954155703	0.861712657187082	0.956755251124324	6.92684886515913e-114	-866.006713151135	-854.966195324083	0.829144640607068	0.0241451656283219	p < 0.0001	***	1.6162647352038e-113	p < 0.0001	***
IgG4	log10_mother	log10_cb	RSV	other_antigens	0.865088264816321	0.820577814853151	0.909598714779491	1.21493513206844e-113	-516.858421555589	-505.911498841106	0.837880107693153	0.0226123658121766	p < 0.0001	***	4.25227296223955e-113	p < 0.0001	***
IgG4	log10_mother	log10_cb	Diphteria_toxin	vaccine_antigens	0.823140615534499	0.780569367676333	0.865711863392664	2.5308994132424e-113	-691.291068887723	-680.333601346917	0.835985272910699	0.0216275344491751	p < 0.0001	***	7.08651835707873e-113	p < 0.0001	***
IgG3	log10_mother	log10_cb	HepB	vaccine_antigens	0.861927032619629	0.816593851911197	0.907260213328061	1.27933806240126e-112	-832.460782870515	-821.451140101573	0.828835461321438	0.0230324004550609	p < 0.0001	***	2.55867612480253e-112	p < 0.0001	***
IgG1	log10_mother	log10_cb	Cp17	other_antigens	0.905607303524914	0.856610624640793	0.954603982409035	2.79673829555857e-110	-1000.41140282504	-989.370884997984	0.819118155975486	0.0248947945944315	p < 0.0001	***	4.35048179309111e-110	p < 0.0001	***
IgG	log10_mother	log10_cb	Measles	vaccine_antigens	0.898902966064041	0.850417449669491	0.94738848245859	2.00938510528195e-109	-1047.3941218545	-1036.41567520722	0.823092315935005	0.0246329114546274	p < 0.0001	***	3.12571016377193e-109	p < 0.0001	***
IgG	log10_mother	log10_cb	VSP5	other_antigens	0.856776927778661	0.809402498743152	0.90415135681417	2.78636338973328e-107	-1082.01850849788	-1071.01922843354	0.814684924502913	0.0240691423101702	p < 0.0001	***	3.9009087456266e-107	p < 0.0001	***
IgG1	log10_mother	log10_cb	VSP5	other_antigens	0.977496860850334	0.921785809697765	1.0332079120029	4.09294552376123e-105	-673.576072056957	-662.525332754941	0.802624744894142	0.0283067146946066	p < 0.0001	***	5.73012373326572e-105	p < 0.0001	***
IgG2	log10_mother	log10_cb	Diphteria_toxin	vaccine_antigens	0.926599790766149	0.874178616546026	0.979020964986272	6.28920797128897e-103	-738.829184533264	-727.946321192192	0.813697976207317	0.0266287064745862	p < 0.0001	***	1.10061139497557e-102	p < 0.0001	***
IgG	log10_mother	log10_cb	Tetanus_toxin	vaccine_antigens	0.844219358126324	0.794242401867628	0.894196314385021	1.97780638701196e-100	-1222.2426076206	-1211.24332755627	0.793169801419885	0.0253913872295558	p < 0.0001	***	2.51720812892431e-100	p < 0.0001	***
IgG	log10_mother	log10_cb	RSV	other_antigens	0.943945275557978	0.887646232225594	1.00024431889036	2.3449923633526e-99	-1486.88510513244	-1475.90665848516	0.791869996912301	0.0286025488127574	p < 0.0001	***	2.73582442391136e-99	p < 0.0001	***
IgG	log10_mother	log10_cb	Rotavirus	other_antigens	0.875794691753283	0.82041590357579	0.931173479930776	3.81903646662198e-94	-1299.77230336553	-1288.76266059659	0.770066255901731	0.0281362658892975	p < 0.0001	***	4.11280850251597e-94	p < 0.0001	***
IgG1	log10_mother	log10_cb	Tetanus_toxin	vaccine_antigens	0.778553934820792	0.727641803184648	0.829466066456935	1.69890376772331e-91	-1049.76398148952	-1038.71324218751	0.755387555733686	0.025868389752185	p < 0.0001	***	2.16224115892058e-91	p < 0.0001	***
IgG	log10_mother	log10_cb	Pneumo	other_antigens	0.861376952836009	0.804749779875766	0.918004125796252	3.85910242254482e-90	-1290.33679603358	-1279.34791459317	0.757279483835256	0.0287696829775647	p < 0.0001	***	3.85910242254482e-90	p < 0.0001	***
IgG2	log10_mother	log10_cb	OSP	other_antigens	0.859238339717681	0.798373275599231	0.920103403836131	1.76079233769534e-83	-542.647254046823	-531.637611277881	0.727371202646445	0.0309236746372473	p < 0.0001	***	2.73901030308165e-83	p < 0.0001	***
IgG2	log10_mother	log10_cb	Cp17	other_antigens	0.810461533526732	0.75248040713781	0.868442659915653	2.45845803580516e-82	-864.675409616285	-853.686528175878	0.724820831698961	0.0294575649408197	p < 0.0001	***	3.44184125012722e-82	p < 0.0001	***
IgG3	log10_mother	log10_cb	Pneumo	other_antigens	0.836913633016138	0.771075277395431	0.902751988636845	1.34552946831741e-74	-729.711699684216	-718.6609603822	0.68079419364318	0.0334523852980913	p < 0.0001	***	2.35467656955547e-74	p < 0.0001	***
IgG2	log10_mother	log10_cb	Rotavirus	other_antigens	0.77512561415544	0.713339323935542	0.836911904375339	3.61857435523465e-73	-736.302349557739	-725.282379756224	0.677304129717126	0.0313921797558092	p < 0.0001	***	4.60545827029865e-73	p < 0.0001	***
IgG	log10_pf_exposure	log10_cb	MSP1_42_3D7	exposure_antigen	0.950718091658258	0.874238271073122	1.02719791224339	2.17207091621201e-72	-822.912289299462	-811.892319497947	0.673283545513944	0.0388576214392528	p < 0.0001	***	3.04089928269682e-71	p < 0.0001	***
IgG1	log10_mother	log10_cb	Rotavirus	other_antigens	0.82912935913337	0.761378053380526	0.896880664886214	2.3927586863607e-71	-1031.92702900203	-1020.87628970001	0.664034578787793	0.0344243528430424	p < 0.0001	***	2.79155180075415e-71	p < 0.0001	***
IgG1	log10_mother	log10_cb	Pneumo	other_antigens	0.842056997452519	0.77293641077135	0.911177584133689	1.09123899619413e-70	-980.857144900806	-969.837175099291	0.664321812069175	0.0351185655296625	p < 0.0001	***	1.17518045743984e-70	p < 0.0001	***
IgG3	log10_mother	log10_cb	Tetanus_toxin	vaccine_antigens	0.794641300059062	0.728523246201597	0.860759353916527	7.9009465256895e-70	-217.907263027018	-206.856523725002	0.655904381325066	0.0335944996187634	p < 0.0001	***	1.22903612621837e-69	p < 0.0001	***
IgG4	log10_mother	log10_cb	Rotavirus	other_antigens	0.743254843128417	0.675769058012993	0.810740628243841	1.09670392749594e-62	-87.7812349509538	-76.7407171239026	0.616222985081216	0.034288951756624	p < 0.0001	***	2.55897583082386e-62	p < 0.0001	***
IgG3	log10_mother	log10_cb	Shiga_toxin	other_antigens	0.745633925073756	0.671412704336374	0.819855145811138	8.23947246400772e-56	-541.877044673995	-530.826305371979	0.570966223145825	0.037711708471356	p < 0.0001	***	1.15352614496108e-55	p < 0.0001	***
IgG1	log10_mother	log10_cb	RSV	other_antigens	0.846192881343514	0.759618124237893	0.932767638449135	8.82695618140774e-54	-1018.94073281549	-1007.90021498844	0.558285303216934	0.0439878955939955	p < 0.0001	***	8.82695618140774e-54	p < 0.0001	***
IgG2	log10_mother	log10_cb	RSV	other_antigens	0.707086519882791	0.634201136977974	0.779971902787608	8.35216812591006e-53	-925.139322108176	-914.18185456737	0.561495386225051	0.0370280696226501	p < 0.0001	***	9.74419614689508e-53	p < 0.0001	***
IgG2	log10_mother	log10_cb	Tetanus_toxin	vaccine_antigens	0.721641902484597	0.640164488267259	0.803119316701935	1.20258506760565e-46	-646.708369337567	-635.772028644638	0.517914520896777	0.0413918268438479	p < 0.0001	***	1.29509161126763e-46	p < 0.0001	***
IgG4	log10_mother	log10_cb	Pertussis_toxin	vaccine_antigens	0.715471787193375	0.629625261555583	0.801318312831166	3.10799767230682e-43	-230.604891099227	-219.574629692422	0.479494460327022	0.0436172592907974	p < 0.0001	***	6.21599534461365e-43	p < 0.0001	***
IgG3	log10_mother	log10_cb	VSP5	other_antigens	0.770887065868501	0.667932892922682	0.87384123881432	3.94479035742689e-37	-336.51487831143	-325.464139009414	0.424552300054944	0.0523108851817473	p < 0.0001	***	5.02064227308877e-37	p < 0.0001	***
IgG4	log10_mother	log10_cb	Cp17	other_antigens	0.70966244789357	0.614927229344998	0.804397666442142	5.50106260112001e-37	-166.754666057037	-155.765784616629	0.429877288793474	0.0481306422689733	p < 0.0001	***	9.62685955196001e-37	p < 0.0001	***
IgG1	log10_pf_exposure	log10_cb	MSP1_42_3D7	exposure_antigen	0.836689775829016	0.713440664224807	0.959938887433225	4.24274693316719e-32	-535.79913487887	-524.748395576854	0.377272858247309	0.0626227178695624	p < 0.0001	***	5.93984570643407e-31	p < 0.0001	***
IgG3	log10_mother	log10_cb	Pertussis_toxin	vaccine_antigens	0.509315168713572	0.427413962035768	0.591216375391377	4.41175191611939e-28	-430.453260350655	-419.402521048639	0.33679599838271	0.0416138996233195	p < 0.0001	***	5.14704390213929e-28	p < 0.0001	***
IgG2	log10_mother	log10_cb	Pneumo	other_antigens	0.545733764856183	0.45576935156077	0.635698178151595	8.55893152590866e-27	-741.009428919691	-730.115793574227	0.33746433402192	0.0457005032467586	p < 0.0001	***	8.55893152590866e-27	p < 0.0001	***
IgG3	log10_mother	log10_cb_mot_ratio	Pertussis_toxin	vaccine_antigens	-0.490684831286427	-0.572586037964231	-0.408783624608622	1.65342365962248e-26	-430.453260350656	-419.40252104864	0.320242983444139	0.0416138996233195	p < 0.0001	***	2.31479312347147e-25	p < 0.0001	***
IgG3	log10_pf_exposure	log10_cb	MSP1_42_3D7	exposure_antigen	0.729663891609037	0.604086827641257	0.855240955576817	2.84565878937795e-25	-524.796466636907	-513.74572733489	0.306961991735358	0.0638055475239117	p < 0.0001	***	3.98392230512913e-24	p < 0.0001	***
IgG4	log10_mother	log10_cb	Measles	vaccine_antigens	0.617656134945597	0.503503284389058	0.731808985502137	1.5794158451332e-22	-72.1159873251393	-61.1271058847314	0.281462794935694	0.0579958551666126	p < 0.0001	***	2.45686909242943e-22	p < 0.0001	***
IgG2	log10_mother	log10_cb_mot_ratio	Pneumo	other_antigens	-0.454266235143818	-0.54423064843923	-0.364301821848406	4.14260059887139e-20	-741.009428919692	-730.115793574228	0.260254665792084	0.0457005032467585	p < 0.0001	***	5.79964083841995e-19	p < 0.0001	***
IgG4	log10_mother	log10_cb	Shiga_toxin	other_antigens	0.682228185237517	0.541786200174552	0.822670170300483	5.09931497482597e-19	-49.1356044505155	-38.0848651484994	0.235794717267819	0.0713583951491867	p < 0.0001	***	7.13904096475635e-19	p < 0.0001	***
IgG3	log10_mother	log10_cb	OSP	other_antigens	0.610688361407467	0.483374175922182	0.738002546892751	1.23054168841946e-18	64.7503471627583	75.8010864647744	0.231219180168517	0.0646881767719435	p < 0.0001	***	1.3251987413748e-18	p < 0.0001	***
IgG4	log10_mother	log10_cb	HiB	vaccine_antigens	0.651091526187715	0.512491027835916	0.789692024539515	5.39156225258844e-18	196.922949623032	207.932592391973	0.22621478108541	0.0704186675504082	p < 0.0001	***	6.33540253736627e-18	p < 0.0001	***
IgG4	log10_mother	log10_cb	VSP5	other_antigens	0.700838057018294	0.551532542102329	0.85014357193426	5.43034503202823e-18	-2.15944858939493	8.88106923765628	0.224124987687769	0.075860858537769	p < 0.0001	***	6.33540253736627e-18	p < 0.0001	***
IgG4	log10_mother	log10_cb	HepB	vaccine_antigens	0.540664734457914	0.42050430729845	0.660825161617377	8.80123810005359e-17	-479.811096467629	-468.811816403292	0.211894256391648	0.0610489346306249	p < 0.0001	***	9.47825641544232e-17	p < 0.0001	***
IgG4	log10_mother	log10_cb	OSP	other_antigens	0.62734416075671	0.486630358034751	0.768057963478669	1.53685465070066e-16	194.246029016022	205.255671784964	0.208219782891428	0.071492372765359	p < 0.0001	***	1.53685465070066e-16	p < 0.0001	***
IgG1	log10_mother	log10_cb_mot_ratio	Tetanus_toxin	vaccine_antigens	-0.221446065179207	-0.27235819681535	-0.170533933543063	6.51877172096123e-16	-1049.76398148952	-1038.71324218751	0.197879931345653	0.025868389752185	p < 0.0001	***	9.12628040934572e-15	p < 0.0001	***
IgG4	log10_mother	log10_cb_mot_ratio	Diphteria_toxin	vaccine_antigens	-0.176859384465501	-0.219430632323666	-0.134288136607336	9.85047892091721e-15	-691.291068887723	-680.333601346917	0.188273812079018	0.0216275344491751	p < 0.0001	***	1.37906704892841e-13	p < 0.0001	***
IgG3	log10_mother	log10_cb	HiB	vaccine_antigens	0.577788778673595	0.435249499949682	0.720328057397508	3.41349832736907e-14	112.496849499692	123.547588801708	0.176147661100261	0.0724240274081916	p < 0.0001	***	3.41349832736907e-14	p < 0.0001	***
IgG2	log10_mother	log10_cb_mot_ratio	RSV	other_antigens	-0.292913480117208	-0.365798863022025	-0.220028097212391	5.80401371183111e-14	-925.139322108176	-914.18185456737	0.178186677151977	0.0370280696226501	p < 0.0001	***	4.06280959828178e-13	p < 0.0001	***
IgG4	log10_mother	log10_cb_mot_ratio	HepB	vaccine_antigens	-0.459335265542086	-0.579495692701549	-0.339174838382622	6.87478284949931e-13	-479.811096467629	-468.811816403292	0.161843716384137	0.0610489346306249	p < 0.0001	***	3.92336572848533e-12	p < 0.0001	***
IgG4	log10_mother	log10_cb_mot_ratio	Rotavirus	other_antigens	-0.256745156871582	-0.324230941987006	-0.189259371756158	8.4072122753257e-13	-87.7812349509537	-76.7407171239025	0.158660379102717	0.034288951756624	p < 0.0001	***	3.92336572848533e-12	p < 0.0001	***
IgG2	log10_mother	log10_cb_mot_ratio	Rotavirus	other_antigens	-0.224874385844558	-0.286660676064457	-0.163088095624659	6.56116542760967e-12	-736.302349557739	-725.282379756225	0.147846157836058	0.0313921797558092	p < 0.0001	***	3.06187719955118e-11	p < 0.0001	***
IgG2	log10_mother	log10_cb_mot_ratio	HepB	vaccine_antigens	-0.123379444153947	-0.157950983932216	-0.0888079043756783	1.72859179287064e-11	-878.40119787934	-867.583791680452	0.151449413237981	0.0175597991429572	p < 0.0001	***	6.05007127504724e-11	p < 0.0001	***
IgG	motHIV+	log10_cb	Tetanus_toxin	vaccine_antigens	-0.0503112754532162	-0.0647732592789195	-0.0358492916275129	4.37089172494159e-11	-803.216132481079	-792.124852021563	0.13379199382369	0.00734852896036056	p < 0.0001	***	6.11924841491823e-10	p < 0.0001	***
IgG3	log10_mother	log10_cb_mot_ratio	Shiga_toxin	other_antigens	-0.254366074926242	-0.328587295663624	-0.18014485418886	8.20033430351767e-11	-541.877044673995	-530.826305371979	0.131839607803634	0.037711708471356	p < 0.0001	***	5.74023401246237e-10	p < 0.0001	***
IgG2	log10_mother	log10_cb_mot_ratio	Tetanus_toxin	vaccine_antigens	-0.278358097515403	-0.359835511732741	-0.196880683298065	9.80103995721019e-11	-646.708369337567	-635.772028644637	0.135565931187332	0.0413918268438479	p < 0.0001	***	2.74429118801885e-10	p < 0.0001	***
IgG4	log10_mother	log10_cb_mot_ratio	Measles	vaccine_antigens	-0.382343865054403	-0.496496715610942	-0.268191014497863	2.07922441967849e-10	-72.1159873251391	-61.1271058847313	0.128884070859059	0.0579958551666126	p < 0.0001	***	7.27728546887471e-10	p < 0.0001	***
IgG4	log10_mother	log10_cb_mot_ratio	Pertussis_toxin	vaccine_antigens	-0.284528212806626	-0.370374738444417	-0.198681687168834	3.05518564122761e-10	-230.604891099227	-219.574629692422	0.124952476381263	0.0436172592907974	p < 0.0001	***	8.55451979543731e-10	p < 0.0001	***
IgG2	log10_mother	log10_cb_mot_ratio	Cp17	other_antigens	-0.189538466473269	-0.24751959286219	-0.131557340084348	5.20757954768583e-10	-864.675409616287	-853.686528175879	0.12339663465478	0.0294575649408196	p < 0.0001	***	1.21510189446003e-09	p < 0.0001	***
IgG1	motHIV+	log10_cb_mot_ratio	Shiga_toxin	other_antigens	-0.0125608522785267	-0.0164672796821826	-0.0086544248748708	9.30143877224624e-10	-1568.60022593384	-1557.54948663182	0.117597857321146	0.00198485082766888	p < 0.0001	***	1.30220142811447e-08	p < 0.0001	***
IgG	log10_mother	log10_cb_mot_ratio	Tetanus_toxin	vaccine_antigens	-0.155780641873675	-0.205757598132371	-0.105803685614978	2.8150799136786e-09	-1222.2426076206	-1211.24332755627	0.112864546689928	0.0253913872295558	p < 0.0001	***	3.94111187915004e-08	p < 0.0001	***
IgG3	log10_mother	log10_cb_mot_ratio	Tetanus_toxin	vaccine_antigens	-0.205358699940938	-0.271476753798403	-0.139240646083474	3.12739837740536e-09	-217.907263027017	-206.856523725001	0.110415204112811	0.0335944996187634	p < 0.0001	***	1.27695840988959e-08	p < 0.0001	***
IgG3	log10_mother	log10_cb_mot_ratio	Rotavirus	other_antigens	-0.0974542496646304	-0.12897421986251	-0.065934279466751	3.64845259968453e-09	-945.640933999318	-934.590194697302	0.109499083478949	0.0160152570291744	p < 0.0001	***	1.27695840988959e-08	p < 0.0001	***
IgG4	log10_mother	log10_cb_mot_ratio	Cp17	other_antigens	-0.290337552106429	-0.385072770655001	-0.195602333557858	4.98919754219563e-09	-166.754666057037	-155.765784616629	0.109769492352878	0.0481306422689733	p < 0.0001	***	1.16414609317898e-08	p < 0.0001	***
IgG3	log10_mother	log10_cb_mot_ratio	OSP	other_antigens	-0.389311638592534	-0.516625824077818	-0.261997453107249	5.27415478761719e-09	64.7503471627583	75.8010864647744	0.107305282882842	0.0646881767719435	p < 0.0001	***	1.41996117471697e-08	p < 0.0001	***
IgG3	log10_mother	log10_cb_mot_ratio	HepB	vaccine_antigens	-0.138072967380371	-0.183406148088803	-0.0927397866719387	6.08554789164415e-09	-832.460782870515	-821.451140101573	0.107850555216981	0.0230324004550609	p < 0.0001	***	1.41996117471697e-08	p < 0.0001	***
IgG4	log10_mother	log10_cb_mot_ratio	RSV	other_antigens	-0.134911735183679	-0.179422185146849	-0.0904012852205084	7.2600436911154e-09	-516.858421555589	-505.911498841105	0.10893228083968	0.0226123658121766	p < 0.0001	***	1.45200873822308e-08	p < 0.0001	***
IgG	log10_mother	log10_cb_mot_ratio	VSP5	other_antigens	-0.143223072221339	-0.190597501256848	-0.0958486431858304	7.7733226646816e-09	-1082.01850849788	-1071.01922843354	0.106722673111626	0.0240691423101702	p < 0.0001	***	5.44132586527712e-08	p < 0.0001	***
IgG3	log10_mother	log10_cb_mot_ratio	HiB	vaccine_antigens	-0.422211221326406	-0.564750500050319	-0.279671942602493	1.46854187708699e-08	112.496849499692	123.547588801708	0.101187131645699	0.0724240274081916	p < 0.0001	***	2.93708375417398e-08	p < 0.0001	***
IgG	motHIV+	log10_cb_mot_ratio	Shiga_toxin	other_antigens	-0.0126612032922079	-0.0170737661186982	-0.00824864046571758	3.88400403348235e-08	-1489.76738489772	-1478.73712349092	0.0959731921958583	0.00224195324749676	p < 0.0001	***	5.43760564687529e-07	p < 0.0001	***
IgG2	log10_mother	log10_cb_mot_ratio	VSP5	other_antigens	-0.122597920962612	-0.166727108468877	-0.0784687334563484	9.937665394327e-08	-570.796627850994	-559.818181203715	0.0917822595802722	0.0224196925028245	p < 0.0001	***	1.95583198071116e-07	p < 0.0001	***
IgG2	log10_mother	log10_cb_mot_ratio	Pertussis_toxin	vaccine_antigens	-0.108381070598587	-0.147555015187492	-0.0692071260096812	1.11761827469209e-07	-912.159196354902	-901.191220922442	0.0913622834836194	0.0199018983582901	p < 0.0001	***	1.95583198071116e-07	p < 0.0001	***
IgG	log10_mother	log10_cb_mot_ratio	HiB	vaccine_antigens	-0.0871541475115707	-0.118909734562163	-0.0553985604609785	1.38260304683364e-07	-1437.4952126388	-1426.48556986986	0.0888463223298999	0.0161340410314236	p < 0.0001	***	6.4521475518903e-07	p < 0.0001	***
IgG4	log10_mother	log10_cb_mot_ratio	OSP	other_antigens	-0.372655839243291	-0.51336964196525	-0.231942036521332	3.55977596960596e-07	194.246029016022	205.255671784964	0.0830357906366178	0.071492372765359	p < 0.0001	***	6.22960794681044e-07	p < 0.0001	***
IgG	motHIV+	log10_cb_mot_ratio	Pertussis_toxin	vaccine_antigens	-0.0131637631552681	-0.0181357424508208	-0.00819178385971553	3.6041860290122e-07	-1401.56079817945	-1390.58235153217	0.083796623541829	0.00252599817118492	p < 0.0001	***	2.52293022030854e-06	p < 0.0001	***
IgG	motHIV+	log10_cb_mot_ratio	HepB	vaccine_antigens	-0.0165404656477365	-0.0229871257205159	-0.0100938055749571	7.93943760038069e-07	-1239.34387987885	-1228.40753918592	0.0799578444384774	0.00327500620898263	p < 0.0001	***	3.70507088017766e-06	p < 0.0001	***
IgG3	log10_mother	log10_cb_mot_ratio	MSP1_42_3D7	exposure_antigen	-0.105378270259189	-0.146848531627241	-0.0639080088911373	9.85301838399397e-07	-995.282945949213	-984.232206647197	0.0757420695158638	0.0210709873996352	p < 0.0001	***	1.72427821719894e-06	p < 0.0001	***
IgG1	log10_mother	log10_cb_mot_ratio	Rotavirus	other_antigens	-0.17087064086663	-0.238621946619474	-0.103119335113786	1.17773106604758e-06	-1031.92702900203	-1020.87628970001	0.074652721823033	0.0344243528430424	p < 0.0001	***	8.24411746233306e-06	p < 0.0001	***
IgG4	log10_mother	log10_cb_mot_ratio	HiB	vaccine_antigens	-0.348908473812283	-0.487508972164082	-0.210307975460483	1.23702600111144e-06	196.922949623032	207.932592391973	0.075347263930867	0.0704186675504082	p < 0.0001	***	1.92426266839557e-06	p < 0.0001	***
IgG	motHIV+	log10_cb	Pneumo	other_antigens	-0.0298895354941746	-0.0419026666243127	-0.0178764043640365	1.60868464356124e-06	-912.894708958175	-901.813512541767	0.0720330957385834	0.00610411507746975	p < 0.0001	***	1.12607925049287e-05	p < 0.0001	***
IgG3	log10_mother	log10_cb_mot_ratio	Pneumo	other_antigens	-0.163086366983865	-0.228924722604572	-0.0972480113631577	1.78764093135234e-06	-729.711699684216	-718.6609603822	0.0721017198365462	0.0334523852980914	p < 0.0001	***	2.78077478210364e-06	p < 0.0001	***
IgG1	log10_mother	log10_cb_mot_ratio	Pertussis_toxin	vaccine_antigens	-0.0899185750147737	-0.12635651107691	-0.0534806389526371	1.94836280649095e-06	-1195.67947476106	-1184.62873545905	0.0715749612583598	0.0185140692705034	p < 0.0001	***	9.09235976362441e-06	p < 0.0001	***
IgG2	log10_mother	log10_cb_mot_ratio	MSP1_42_3D7	exposure_antigen	-0.0653135334328303	-0.0917929196860742	-0.0388341471795865	1.9816065578219e-06	-721.706554923706	-710.707274859369	0.0726724539178195	0.0134531672252468	p < 0.0001	***	3.08249908994517e-06	p < 0.0001	***
IgG4	log10_mother	log10_cb_mot_ratio	MSP1_42_3D7	exposure_antigen	-0.0595824730097827	-0.0837454679111519	-0.0354194781084134	2.00275912984855e-06	-1306.26285704993	-1295.29488161747	0.0733459581387135	0.0122757479137071	p < 0.0001	***	2.80386278178796e-06	p < 0.0001	***
IgG	log10_mother	log10_cb_mot_ratio	Pneumo	other_antigens	-0.138623047163982	-0.195250220124226	-0.0819958742037391	2.35191918175879e-06	-1290.33679603357	-1279.34791459316	0.0718483571988685	0.0287696829775651	p < 0.0001	***	8.23171713615576e-06	p < 0.0001	***
IgG2	log10_mother	log10_cb_mot_ratio	OSP	other_antigens	-0.14076166028232	-0.20162672440077	-0.0798965961638708	7.85051159815508e-06	-542.647254046823	-531.637611277881	0.0638761919245912	0.0309236746372473	p < 0.0001	***	1.09907162374171e-05	p < 0.0001	***
IgG	log10_mother	log10_cb_mot_ratio	MSP1_42_3D7	exposure_antigen	-0.078775774256911	-0.113043192672206	-0.0445083558416159	8.8465494537594e-06	-1185.77686317851	-1174.756893377	0.0629205852956399	0.0174104798140805	p < 0.0001	***	2.47703384705263e-05	p < 0.0001	***
IgG1	log10_mother	log10_cb_mot_ratio	Pneumo	other_antigens	-0.157943002547481	-0.22706358922865	-0.0888224158663114	9.97210353645969e-06	-980.857144900806	-969.837175099292	0.0621770259048585	0.0351185655296625	p < 0.0001	***	3.49023623776089e-05	p < 0.0001	***
IgG4	log10_mother	log10_cb_mot_ratio	Shiga_toxin	other_antigens	-0.317771814762484	-0.458213799825449	-0.177329829699518	1.20597555481764e-05	-49.1356044505154	-38.0848651484993	0.0603879272968145	0.0713583951491867	p < 0.0001	***	1.53487797885881e-05	p < 0.0001	***
IgG	log10_mother	log10_cb_mot_ratio	Rotavirus	other_antigens	-0.124205308246711	-0.179584096424205	-0.0688265200692173	1.43381731679348e-05	-1299.77230336553	-1288.76266059659	0.060123197512029	0.0281362658892977	p < 0.0001	***	3.34557373918479e-05	p < 0.0001	***
IgG1	age_catbetween_20_30	log10_cb	Pertussis_toxin	vaccine_antigens	-0.0549838433989213	-0.0796682779114796	-0.030299408886363	1.61773003822556e-05	-579.307811880718	-564.45288065868	0.0545292464638071	0.0125435218968133	p < 0.0001	***	0.000226482205351578	p < 0.001	**
IgG3	log10_mother	log10_cb_mot_ratio	VSP5	other_antigens	-0.2291129341315	-0.332067107077319	-0.126158761185681	1.65721418002732e-05	-336.51487831143	-325.464139009414	0.0584316613430889	0.0523108851817474	p < 0.0001	***	2.32009985203825e-05	p < 0.0001	***
IgG	motHIV+	log10_cb_mot_ratio	Pneumo	other_antigens	-0.0135588272808428	-0.0196658727101492	-0.00745178185153643	1.74037846579244e-05	-1286.47381609032	-1275.48493464991	0.059315076052452	0.00310271114989415	p < 0.0001	***	6.09132463027353e-05	p < 0.0001	***
IgG1	motHIV+	log10_cb_mot_ratio	Pertussis_toxin	vaccine_antigens	-0.0163198878930047	-0.0237431001162948	-0.00889667566971456	2.07903460155986e-05	-1191.11091215135	-1180.06017284933	0.057035182876076	0.00377172475074545	p < 0.0001	***	0.000144406359152298	p < 0.001	**
IgG1	log10_mother	log10_cb_mot_ratio	Measles	vaccine_antigens	-0.095760469050839	-0.139445157479393	-0.0520757806222854	2.19380430240217e-05	-1056.03832607451	-1044.98758677249	0.056704188492067	0.0221961349909448	p < 0.0001	***	6.14265204672607e-05	p < 0.0001	***
IgG1	motHIV+	log10_cb_mot_ratio	Diphteria_toxin	vaccine_antigens	-0.0214232620475111	-0.0313815159822727	-0.0114650081127495	3.09442198183495e-05	-1000.34108125016	-989.362634602884	0.0558896960782329	0.00505925904597056	p < 0.0001	***	0.000144406359152298	p < 0.001	**
IgG2	log10_mother	log10_cb_mot_ratio	Measles	vaccine_antigens	-0.096318717320565	-0.141784411249573	-0.0508530233915567	4.05683137402217e-05	-779.045681332827	-768.098758618343	0.0547428920768896	0.0230976524361779	p < 0.0001	***	5.16323993057367e-05	p < 0.0001	***
IgG	motHIV+	log10_cb_mot_ratio	Cp17	other_antigens	-0.013919664473799	-0.0205281287110631	-0.0073112002365348	4.4619992167149e-05	-1243.81478577054	-1232.8155057062	0.0532168244574454	0.00335750888014206	p < 0.0001	***	0.000124935978068017	p < 0.001	**
IgG	age	log10_cb	VSP5	other_antigens	0.00311787290474919	0.00162226388326633	0.00461348192623204	5.27783796316876e-05	-628.264060604496	-617.152713180527	0.0502843235585144	0.000759980729525981	p < 0.0001	***	0.000738897314843626	p < 0.001	**
IgG	log10_mother	log10_cb_mot_ratio	Measles	vaccine_antigens	-0.101097033935959	-0.149582550330509	-0.0526115175414099	5.30330726617996e-05	-1047.3941218545	-1036.41567520722	0.052490703215449	0.0246329114546274	p < 0.0001	***	0.000106066145323599	p < 0.001	**
IgG1	hivload	log10_cb_mot_ratio	RSV	other_antigens	-6.73205376617966e-08	-9.92717151430659e-08	-3.53693601805272e-08	6.13119190601512e-05	-557.068701449088	-549.078384166752	0.135500424316149	1.61122404667371e-08	p < 0.0001	***	0.000858366866842117	p < 0.001	**
IgG2	motHIV+	log10_cb_mot_ratio	HepB	vaccine_antigens	-0.0251246035772204	-0.037508117780803	-0.0127410893736378	8.36810365051676e-05	-848.342918989334	-837.525512790446	0.0522999206388194	0.00628991429058519	p < 0.0001	***	0.00117153451107235	p = 0.001	*
IgG4	log10_mother	log10_cb_mot_ratio	VSP5	other_antigens	-0.299161942981706	-0.448467457897672	-0.14985642806574	0.000100650820164003	-2.1594485893948	8.8810692376564	0.0474689149942792	0.075860858537769	p < 0.001	**	0.000117425956858003	p < 0.001	**
IgG	age_catbetween_20_30	log10_cb	Pneumo	other_antigens	-0.0282371860366432	-0.0423543885760688	-0.0141199834972175	0.000103265202092637	-907.130602680661	-892.35567412545	0.0570008170934262	0.00717313584410395	p < 0.001	**	0.00144571282929692	p = 0.001	*
IgG3	log10_mother	log10_cb_mot_ratio	Diphteria_toxin	vaccine_antigens	-0.038884048412354	-0.0583769753226633	-0.0193911215020447	0.000108101991308344	-1296.62135092112	-1285.62207085679	0.0476676344985884	0.00990361343446088	p < 0.001	**	0.000137584352574257	p < 0.001	**
IgG	hemoglobin	log10_cb_mot_ratio	HepB	vaccine_antigens	0.00396032752924581	0.00196460539026822	0.0059560496682234	0.000117640549792532	-1220.80556246563	-1209.89049845763	0.0484582435326871	0.00101382726400688	p < 0.001	**	0.00158683918793775	p = 0.002	*
IgG2	log10_mother	log10_cb_mot_ratio	HiB	vaccine_antigens	-0.0588940337544358	-0.0886154929909444	-0.0291725745179271	0.00011958728733122	-1147.36025039522	-1136.32998898841	0.0465583079326626	0.0151010024504588	p < 0.001	**	0.000139518501886423	p < 0.001	**
IgG1	log10_mother	log10_cb_mot_ratio	HiB	vaccine_antigens	0.0921681633973379	0.0455103930748921	0.138825933719784	0.000125246603277789	-805.576581791536	-794.52584248952	0.0459610121216573	0.0237067541444702	p < 0.001	**	0.000292242074314842	p < 0.001	**
IgG	age_cat>30	log10_cb	Pneumo	other_antigens	-0.0333364997658111	-0.0502242313695109	-0.0164487681621113	0.000126482995798379	-907.130602680661	-892.35567412545	0.0570008170934262	0.00858087801416745	p < 0.001	**	0.0017707619411773	p = 0.002	*
IgG2	hemoglobin	log10_cb_mot_ratio	Pertussis_toxin	vaccine_antigens	0.00703490772642432	0.00341733190757978	0.0106524835452688	0.000159264646385608	-891.867439674338	-880.920516959854	0.0460220516172731	0.00183781444215197	p < 0.001	**	0.00222970504939851	p = 0.002	*
IgG	motHIV+	log10_cb_mot_ratio	RSV	other_antigens	-0.0081435050601621	-0.0123449757052097	-0.00394203441511455	0.000166944847093253	-1497.33839763521	-1486.35995098793	0.0452505000924218	0.00213454371685948	p < 0.001	**	0.000389537976550924	p < 0.001	**
IgG1	motHIV+	log10_cb_mot_ratio	Measles	vaccine_antigens	-0.0181850005716578	-0.0275878391661731	-0.00878216197714259	0.000171868725317409	-1052.10786259665	-1041.05712329464	0.0440086653989205	0.00477757040852577	p < 0.001	**	0.000601540538610932	p < 0.001	**
IgG1	log10_mother	log10_cb_mot_ratio	Cp17	other_antigens	-0.0943926964750867	-0.143389375359208	-0.0453960175909656	0.000181950794525281	-1000.41140282503	-989.370884997982	0.0438039811154076	0.0248947945944316	p < 0.001	**	0.000363901589050562	p < 0.001	**
IgG	log10_pf_exposure	log10_cb_mot_ratio	MSP1_42_3D7	exposure_antigen	-0.0791878066385256	-0.120611696166798	-0.0377639171102528	0.00020367073408019	-1179.77674430858	-1168.75677450706	0.0433984055284162	0.021046516656498	p < 0.001	**	0.00285139027712266	p = 0.003	*
IgG3	log10_mother	log10_cb_mot_ratio	Measles	vaccine_antigens	-0.0907660458442972	-0.138287342812918	-0.0432447488756761	0.000206011727149445	-866.006713151134	-854.966195324083	0.0430353591538291	0.0241451656283219	p < 0.001	**	0.000240347015007686	p < 0.001	**
IgG4	prematurityYes	log10_cb	MSP1_42_3D7	exposure_antigen	-0.109489449834163	-0.166860103808512	-0.0521187958598147	0.000208420072256807	-440.289090085803	-429.248572258752	0.0429634349781949	0.0291495399069279	p < 0.001	**	0.0029178810115953	p = 0.003	*
IgG	prematurityYes	log10_cb_mot_ratio	HiB	vaccine_antigens	-0.0193661663444111	-0.0295572132447633	-0.00917511944405899	0.000222372995469664	-1408.75570876096	-1397.80878604648	0.0438932741279486	0.0051772938874015	p < 0.001	**	0.00311322193657529	p = 0.003	*
IgG	hemoglobin	log10_cb_mot_ratio	Pertussis_toxin	vaccine_antigens	0.00293305452223819	0.00138744887797712	0.00447866016649926	0.000226691312562535	-1378.65376133415	-1367.69629379334	0.0436190790456229	0.000785216337267502	p < 0.001	**	0.00158683918793775	p = 0.002	*
IgG2	motHIV+	log10_cb_mot_ratio	RSV	other_antigens	0.0227114412044644	0.0105657267939083	0.0348571556150204	0.00027845340003863	-881.531887385952	-870.574419845146	0.0423122254756934	0.00617040538015985	p < 0.001	**	0.00194917380027041	p = 0.002	*
IgG1	motHIV+	log10_cb	Tetanus_toxin	vaccine_antigens	-0.0358284253987937	-0.0550083030427932	-0.0166485477547942	0.000280423225997105	-640.625720977896	-629.484522561367	0.0397860499252073	0.00974648426315064	p < 0.001	**	0.00392592516395947	p = 0.004	*
IgG	motHIV+	log10_cb_mot_ratio	Measles	vaccine_antigens	-0.0171567150195816	-0.0264119824371399	-0.00790144760202319	0.00031334314262527	-1044.01717797007	-1033.03873132279	0.0412761244935744	0.00470210899540389	p < 0.001	**	0.000626686285250539	p < 0.001	**
IgG	mat_anemia_recatabnormal	log10_cb_mot_ratio	Pneumo	other_antigens	-0.0128770691963858	-0.0198553026831597	-0.00589883570961176	0.000333305826396739	-1271.5055394551	-1260.53756402264	0.0410277116718044	0.00354521596003701	p < 0.001	**	0.00466628156955434	p = 0.005	*
IgG4	log10_mother	log10_cb_mot_ratio	Tetanus_toxin	vaccine_antigens	-0.0814193761619422	-0.125990741650576	-0.0368480106733082	0.000381078091222658	-285.683992307917	-274.68471224358	0.0397675497659085	0.0226450125256484	p < 0.001	**	0.000410391790547478	p < 0.001	**
IgG1	graviditymultigravidae	log10_cb	Pertussis_toxin	vaccine_antigens	-0.0445739862261342	-0.0690672099301661	-0.0200807625221022	0.000398590377259487	-574.947616544522	-563.806418127994	0.0376810842907987	0.0124465246241996	p < 0.001	**	0.00558026528163282	p = 0.006	*
IgG1	log10_mother	log10_cb_mot_ratio	MSP1_42_3D7	exposure_antigen	-0.0715453672118822	-0.110926607918588	-0.0321641265051765	0.000408982832420249	-1017.32387896661	-1006.28336113956	0.0387938563730994	0.0200092724771399	p < 0.001	**	0.000715719956735436	p < 0.001	**
IgG3	log10_pf_exposure	log10_cb_mot_ratio	Diphteria_toxin	vaccine_antigens	-0.0591594271080217	-0.0921168443614756	-0.0262020098545678	0.000478493783120854	-1293.80503763336	-1282.80575756902	0.0383417616401157	0.0167444079474702	p < 0.001	**	0.00669891296369195	p = 0.007	*
IgG	graviditymultigravidae	log10_cb	Pneumo	other_antigens	-0.0248789017779922	-0.038780376474755	-0.0109774270812293	0.000495889370076216	-901.920097152699	-890.838900736291	0.0371018687047709	0.00706362066444862	p < 0.001	**	0.00694245118106703	p = 0.007	*
IgG1	gest_age	log10_cb_mot_ratio	Measles	vaccine_antigens	0.00812897880851219	0.00358463684813461	0.0126733207688898	0.000500634104052302	-1014.95179769528	-1003.98382226282	0.0384535633136673	0.0023087037251378	p < 0.001	**	0.00700887745673222	p = 0.007	*
IgG1	graviditymultigravidae	log10_cb_mot_ratio	Shiga_toxin	other_antigens	-0.00835682733275727	-0.0130296770669793	-0.00368397759853523	0.000500893542248583	-1543.02965077225	-1531.97891147023	0.0374147423421528	0.00237426904538476	p < 0.001	**	0.00701250959148017	p = 0.007	*
IgG	log10_mother	log10_cb_mot_ratio	Shiga_toxin	other_antigens	-0.0698166968502046	-0.108935120418829	-0.0306982732815803	0.000514297754641165	-1471.46768913701	-1460.43742773021	0.0375046783137556	0.019875451116554	p < 0.001	**	0.000900021070622038	p < 0.001	**
IgG1	age	log10_cb	VSP5	other_antigens	0.00529475810726796	0.00231736161398061	0.00827215460055531	0.000536552410665151	-216.020359623359	-204.879161206831	0.035903261256362	0.00151299964502452	p < 0.001	**	0.0057390013175407	p = 0.006	*
IgG1	log10_mother	log10_cb_mot_ratio	RSV	other_antigens	-0.153807118656485	-0.240381875762106	-0.0672323615508636	0.000544801084198752	-1018.94073281549	-1007.90021498844	0.0370220799170708	0.0439878955939955	p < 0.001	**	0.000847468353198059	p < 0.001	**
IgG1	hivload_cat1000/9999	log10_cb	Cp17	other_antigens	-0.099734175448192	-0.155310131473063	-0.0441582194233209	0.00055585078754044	-195.01751466031	-181.336522418337	0.0978425600400855	0.0280436621460396	p < 0.001	**	0.00778191102556616	p = 0.008	*
IgG	hivload_cat>9999	log10_cb_mot_ratio	RSV	other_antigens	-0.0270364634596952	-0.0422656912883603	-0.0118072356310301	0.00064824755779912	-488.452432947232	-475.278788006084	0.109548378204968	0.00767518280523159	p < 0.001	**	0.00907546580918767	p = 0.009	*
IgG	motHIV+	log10_cb	Rotavirus	other_antigens	-0.0217476276774303	-0.0341872589932105	-0.00930799636165011	0.000663785986167443	-896.041641470643	-884.940310750471	0.0350905616240207	0.00632100378655463	p < 0.001	**	0.00309766793544807	p = 0.003	*
IgG	age	log10_cb	Tetanus_toxin	vaccine_antigens	-0.00203417493643801	-0.00320726292709679	-0.000861086945779229	0.000733117416803437	-770.909017827856	-759.81773736834	0.034604165880937	0.000596078046850394	p < 0.001	**	0.0034904766826042	p = 0.003	*
IgG	age	log10_cb	Diphteria_toxin	vaccine_antigens	0.00270357986728685	0.00114198947650995	0.00426517025806374	0.000747959289129472	-598.539562153171	-587.488822851155	0.0349474823097438	0.000793442104341313	p < 0.001	**	0.0034904766826042	p = 0.003	*
IgG1	age_cat>30	log10_cb	VSP5	other_antigens	0.0934666285022763	0.0394414243253973	0.147491832679155	0.000752863652837781	-217.550141714803	-202.695210492765	0.0438928530068262	0.0274531843631146	p < 0.001	**	0.0105400911397289	p = 0.011	.
IgG1	age_cat>30	log10_cb_mot_ratio	Shiga_toxin	other_antigens	-0.00988392339305662	-0.0156101976827234	-0.00415764910338983	0.000775770043789357	-1542.95256412847	-1528.21824505911	0.0404037192725999	0.00290947112088507	p < 0.001	**	0.010860780613051	p = 0.011	.
IgG	mat_anemiaabnormal	log10_cb_mot_ratio	Pertussis_toxin	vaccine_antigens	-0.00897943829583158	-0.0141823131779662	-0.00377656341369697	0.000778566219480218	-1376.32924359031	-1365.37177604951	0.0357867448492972	0.00264322427482076	p < 0.001	**	0.0108999270727231	p = 0.011	.
IgG1	age	log10_cb	Tetanus_toxin	vaccine_antigens	-0.0025464295971037	-0.00402890004404033	-0.00106395915016707	0.000819857331077243	-638.608000635993	-627.466802219464	0.0333705105907525	0.000753335091591378	p < 0.001	**	0.0057390013175407	p = 0.006	*
IgG	hivload_cat1000/9999	log10_cb_mot_ratio	RSV	other_antigens	-0.0226528519970366	-0.0358417501766815	-0.00946395381739166	0.00094744938675904	-488.452432947232	-475.278788006084	0.109548378204968	0.00664690328802008	p < 0.001	**	0.0132642914146266	p = 0.013	.
IgG	age_cat>30	log10_cb	VSP5	other_antigens	0.0462783791323699	0.0187850743641744	0.0737716839005654	0.00103853747134297	-620.676422969046	-605.861293070421	0.0291718614611929	0.0139702921359261	p = 0.001	*	0.00726976229940081	p = 0.007	*
IgG4	motHIV+	log10_cb	Diphteria_toxin	vaccine_antigens	-0.0672377938125224	-0.10724090999628	-0.0272346776287651	0.00105613901510661	-197.560151984044	-186.468871524528	0.0323902836821969	0.0203266758782115	p = 0.001	*	0.0147859462114925	p = 0.015	.
IgG1	log10_pf_exposure	log10_cb	Pneumo	other_antigens	-0.16162607546073	-0.258006448919825	-0.0652457020016343	0.00108527823884901	-678.678454599335	-667.637936772283	0.0327710406111619	0.0489700456203037	p = 0.001	*	0.00759694767194307	p = 0.008	*
IgG1	motHIV+	log10_cb_mot_ratio	HepB	vaccine_antigens	-0.0286163023341373	-0.045841186223775	-0.0113914184444997	0.00120759416275021	-686.590973196908	-675.622997764448	0.0328935101590816	0.00875091574265428	p = 0.001	*	0.0033812636557006	p = 0.003	*
IgG4	log10_pf_exposure	log10_cb_mot_ratio	MSP1_42_3D7	exposure_antigen	-0.0541633959423256	-0.0868031872096054	-0.0215236046750458	0.00122312017892724	-1294.01874992829	-1283.05077449583	0.0328130009232768	0.0165822925174909	p = 0.001	*	0.0171236825049814	p = 0.017	.
IgG4	gest_age	log10_cb	MSP1_42_3D7	exposure_antigen	0.0210122368462036	0.00833966155632272	0.0336848121360844	0.00123275995943703	-432.199584383029	-421.179614581515	0.0322047532420633	0.00643864132403993	p = 0.001	*	0.0172586394321184	p = 0.017	.
IgG	log10_mother	log10_cb_mot_ratio	HepB	vaccine_antigens	-0.0598858433110231	-0.0960304138838665	-0.0237412727381798	0.00124534080652275	-1225.26916871695	-1214.33282802402	0.033043556078332	0.0183620187369423	p = 0.001	*	0.0019371968101465	p = 0.002	*
IgG2	hivload_cat400/999	log10_cb_mot_ratio	HepB	vaccine_antigens	-0.0530396535919958	-0.0846979319888865	-0.0213813751951051	0.00125844046570029	-302.895430523856	-290.021875631339	0.122279723376772	0.0159423151737424	p = 0.001	*	0.0176181665198041	p = 0.018	.
IgG3	gest_age	log10_cb	OSP	other_antigens	0.0546314827756321	0.0216014609079553	0.0876615046433089	0.00126588262930982	135.957678337021	147.01860440604	0.0316091749691726	0.0167827507492771	p = 0.001	*	0.0112662294655464	p = 0.011	.
IgG1	motHIV+	log10_cb	HiB	vaccine_antigens	-0.0652808576089843	-0.104799165743748	-0.0257625494742207	0.0012814869635779	-202.546883832727	-191.405685416199	0.0307075144116451	0.0200817010145167	p = 0.001	*	0.00838462994603636	p = 0.008	*
IgG1	age_catbetween_20_30	log10_cb_mot_ratio	Shiga_toxin	other_antigens	-0.00775595010846485	-0.0124825508269771	-0.00302934938995266	0.00138175597094071	-1542.95256412847	-1528.21824505911	0.0404037192725999	0.00240154550669735	p = 0.001	*	0.01934458359317	p = 0.019	.
IgG3	gest_age	log10_cb	HiB	vaccine_antigens	0.0562599421481785	0.0214835346411905	0.0910363496551665	0.00160946135222091	166.355841362506	177.416767431525	0.0301423173652773	0.0176700996894048	p = 0.002	*	0.0112662294655464	p = 0.011	.
IgG2	hivload_cat1000/9999	log10_cb_mot_ratio	HepB	vaccine_antigens	-0.05014723362055	-0.0808378640116774	-0.0194566032294226	0.00163426214444712	-302.895430523856	-290.021875631339	0.122279723376772	0.0154550319016793	p = 0.002	*	0.0228796700222596	p = 0.023	.
IgG3	motHIV+	log10_cb	RSV	other_antigens	0.103714026187703	0.0392985679115049	0.168129484463901	0.00169014378960307	93.5384004613429	104.679598877871	0.0290606662002911	0.0327334856898328	p = 0.002	*	0.023662013054443	p = 0.024	.
IgG	age_cat>30	log10_cb	Tetanus_toxin	vaccine_antigens	-0.0342563065971258	-0.0556183566333121	-0.0128942565609395	0.00176509154856057	-768.497422969127	-753.709049023106	0.0299927974142057	0.0108544899992321	p = 0.002	*	0.00823709389328264	p = 0.008	*
IgG1	motHIV+	log10_cb	Diphteria_toxin	vaccine_antigens	-0.0404637126903511	-0.0657404456889036	-0.0151869796917986	0.00179670641700779	-470.597376284113	-459.496045563941	0.0290789080446234	0.0128439759137315	p = 0.002	*	0.00838462994603636	p = 0.008	*
IgG	hemoglobin	log10_cb	Tetanus_toxin	vaccine_antigens	0.00750208555414844	0.00281506353182129	0.0121891075764756	0.00180024876955311	-762.379603497903	-751.30852513493	0.0293598644130576	0.00238153738862681	p = 0.002	*	0.0252034827737435	p = 0.025	.
IgG2	motHIV+	log10_cb_mot_ratio	VSP5	other_antigens	-0.03456450548892	-0.0562869249195852	-0.0128420860582548	0.0019169758998874	-551.873478196944	-540.895031549665	0.0298812647991606	0.0110360056818124	p = 0.002	*	0.00894588753280788	p = 0.009	*
IgG	hemoglobin	log10_cb_mot_ratio	Shiga_toxin	other_antigens	0.002224125211882	0.000824859828173806	0.0036233905955902	0.00193707754542013	-1458.1977203502	-1447.18807758125	0.0295093335742618	0.0007109238786432	p = 0.002	*	0.00903969521196059	p = 0.009	*
IgG1	age	log10_cb_mot_ratio	Shiga_toxin	other_antigens	-0.000503550904579805	-0.000820799963306342	-0.000186301845853268	0.00196413801777085	-1540.47840318087	-1529.42766387885	0.0290253561412365	0.000161193845865723	p = 0.002	*	0.0274979322487919	p = 0.027	.
IgG3	graviditymultigravidae	log10_cb_mot_ratio	Pertussis_toxin	vaccine_antigens	0.0576626880561194	0.0205918929155221	0.0947334831967167	0.0024083511020855	-325.246159323763	-314.195420021747	0.0277794440605197	0.0188356241685939	p = 0.002	*	0.0337169154291969	p = 0.034	.
IgG2	cd4_cells	log10_cb	Pneumo	other_antigens	9.32353332079566e-05	3.37830559456601e-05	0.000152687610470253	0.00240947212534718	-223.198792390851	-215.152398709478	0.0749308602970423	2.998706717135e-05	p = 0.002	*	0.0337326097548605	p = 0.034	.
IgG2	weight_g	log10_cb	Pertussis_toxin	vaccine_antigens	-5.19695962273893e-05	-8.54114598382328e-05	-1.85277326165458e-05	0.00242987184271687	-329.79381326094	-318.722734897968	0.027538752493581	1.6992249696117e-05	p = 0.002	*	0.0340182057980362	p = 0.034	.
IgG4	motHIV+	log10_cb_mot_ratio	HiB	vaccine_antigens	0.126166660212439	0.0447610157019673	0.207572304722911	0.00249757551394429	211.42407819035	222.433720959291	0.0279355214956275	0.0413597143277169	p = 0.002	*	0.0349660571952201	p = 0.035	.
IgG	motHIV+	log10_cb_mot_ratio	VSP5	other_antigens	-0.0140919699080728	-0.0232271908801541	-0.00495674893599151	0.00261542814634912	-1057.53429336172	-1046.53501329738	0.0277455435330618	0.00464125770142939	p = 0.003	*	0.00457699925611096	p = 0.005	*
IgG2	haartno	log10_cb_mot_ratio	Measles	vaccine_antigens	-0.0443879493490983	-0.0729578796552586	-0.015818019042938	0.00262578068839255	-359.055692707797	-350.92710210386	0.0715897722615715	0.014414933874601	p = 0.003	*	0.0367609296374957	p = 0.037	.
IgG1	mat_anemia_recatabnormal	log10_cb_mot_ratio	Pertussis_toxin	vaccine_antigens	-0.0132234254436297	-0.0218043458053461	-0.00464250508191327	0.00264031012921633	-1172.76400424534	-1161.73374283853	0.0274037366104827	0.00435982965635482	p = 0.003	*	0.0369643418090286	p = 0.037	.
IgG1	motHIV+	log10_cb_mot_ratio	Cp17	other_antigens	-0.0159012001062872	-0.0262226676432591	-0.00557973256931528	0.00264711920138268	-995.395822857626	-984.355305030575	0.0272948999270817	0.00524424961238102	p = 0.003	*	0.00617661146989293	p = 0.006	*
IgG	age	log10_cb	Pneumo	other_antigens	-0.00145106300536603	-0.00239434569742849	-0.000507780313303566	0.00268396979224207	-898.773330946765	-887.692134530357	0.0268455592520362	0.000479301028229811	p = 0.003	*	0.00939389427284725	p = 0.009	*
IgG	prematurityYes	log10_cb_mot_ratio	OSP	other_antigens	-0.0106374746064117	-0.0175712157156544	-0.00370373349716895	0.00276053578117339	-1627.49822842305	-1616.55130570857	0.0278908023736112	0.00352250517662385	p = 0.003	*	0.0193237504682137	p = 0.019	.
IgG2	weight_g_catlow	log10_cb	Pertussis_toxin	vaccine_antigens	0.0867145325436237	0.0300476885998633	0.143381376487384	0.00282417278461525	-329.516528976245	-318.445450613272	0.0266273519523503	0.0287931669415413	p = 0.003	*	0.0259494478153787	p = 0.026	.
IgG3	hivload_cat1000/9999	log10_cb_mot_ratio	Pneumo	other_antigens	-0.0528362270364757	-0.08713246020705	-0.0185399938659013	0.00286218370129879	-297.308371076311	-283.944226904001	0.0756005901553649	0.0172928216652109	p = 0.003	*	0.040070571818183	p = 0.04	.
IgG3	hivload_cat>9999	log10_cb_mot_ratio	Pneumo	other_antigens	-0.0615849325778657	-0.10156137378719	-0.021608491368541	0.00286310833710458	-297.308371076311	-283.944226904001	0.0756005901553649	0.0201568920179773	p = 0.003	*	0.0400835167194641	p = 0.04	.
IgG	treatmentmq_full	log10_cb_mot_ratio	RSV	other_antigens	-0.00773051993711364	-0.0127810352460922	-0.00268000462813509	0.00290402500170782	-998.588713433393	-985.975547055402	0.061799529565817	0.00255849673888511	p = 0.003	*	0.0406563500239095	p = 0.041	.
IgG	prematurityYes	log10_cb	Measles	vaccine_antigens	-0.0687630768116877	-0.11398315418048	-0.0235429994428949	0.00300102993838165	-563.048911189991	-552.00839336294	0.0265272438578452	0.0229759355792834	p = 0.003	*	0.0420144191373431	p = 0.042	.
IgG	hivload_cat1000/9999	log10_cb	Cp17	other_antigens	-0.0702429420496966	-0.116145760307053	-0.0243401237923404	0.00303052424221341	-235.127458133969	-221.534963777493	0.0601034108961008	0.023157820767916	p = 0.003	*	0.0424273393909877	p = 0.042	.
IgG2	weight_g_catlow	log10_cb_mot_ratio	RSV	other_antigens	0.0328422389879396	0.0111863411981471	0.054498136777732	0.00308250956200014	-874.069969830899	-863.123047116416	0.0271951635968328	0.0110017104571867	p = 0.003	*	0.0412109811533162	p = 0.041	.
IgG4	prematurityYes	log10_cb	Cp17	other_antigens	-0.185814538664453	-0.308746540483441	-0.0628825368454645	0.00317693469189503	6.22652783601574	17.2567892428206	0.026268347867852	0.0624598020553453	p = 0.003	*	0.0222385428432652	p = 0.022	.
IgG	motHIV+	log10_cb_mot_ratio	Rotavirus	other_antigens	-0.00926266120597734	-0.0154089868577202	-0.00311633555423445	0.00326791780171534	-1289.51190734211	-1278.50226457317	0.0262744561548052	0.00312275978711161	p = 0.003	*	0.00508342769155719	p = 0.005	*
IgG4	graviditymultigravidae	log10_cb_mot_ratio	HepB	vaccine_antigens	0.045737213694885	0.015215098244392	0.076259329145378	0.00344567298798773	-436.412364519172	-425.413084454835	0.0260371105708671	0.0155071238924002	p = 0.003	*	0.0482394218318282	p = 0.048	.
IgG	log10_mother	log10_cb_mot_ratio	Pertussis_toxin	vaccine_antigens	-0.0497100073869743	-0.0829206063016998	-0.0164994084722489	0.00348260541451535	-1384.04877497839	-1373.07032833111	0.0261513814074622	0.0168725385074695	p = 0.003	*	0.0048756475803215	p = 0.005	*
IgG	age_catbetween_20_30	log10_cb	Pertussis_toxin	vaccine_antigens	-0.0300899482374309	-0.0502027226371007	-0.00997717383776111	0.00349421788432718	-696.913180441446	-682.124806495424	0.0230777535651157	0.0102197077625141	p = 0.003	*	0.0244595251902902	p = 0.024	.
IgG2	weight_g_catlow	log10_cb	Pneumo	other_antigens	0.0497851927748945	0.0162955081281231	0.083274877421666	0.00370706397362553	-641.27749440961	-630.257524608095	0.0254095975292372	0.0170153313405799	p = 0.004	*	0.0259494478153787	p = 0.026	.
IgG1	motHIV+	log10_cb	Pertussis_toxin	vaccine_antigens	-0.0319559485756929	-0.0534789269023625	-0.0104329702490233	0.00374390047050762	-570.778504146319	-559.637305729791	0.024348594812913	0.0109371589042773	p = 0.004	*	0.0126840831345109	p = 0.013	.
IgG1	hemoglobin	log10_cb_mot_ratio	Shiga_toxin	other_antigens	0.00186392806708125	0.000607047206316668	0.00312080892784584	0.00378947796239451	-1530.57297619388	-1519.54271478708	0.0251883267904865	0.000638601247916733	p = 0.004	*	0.0530526914735232	ns	ns
IgG4	gest_age	log10_cb	Measles	vaccine_antigens	0.0412818034700149	0.0131493599577734	0.0694142469822564	0.00416737195846183	35.633378496972	46.6636399037768	0.0246068873770302	0.0142936487416442	p = 0.004	*	0.0205772626235224	p = 0.021	.
IgG1	age_cat>30	log10_cb	Tetanus_toxin	vaccine_antigens	-0.039768627611605	-0.0669512918046218	-0.0125859634185882	0.00427532767110599	-633.794123713545	-618.939192491508	0.0210997183932524	0.0138130101115082	p = 0.004	*	0.0299272936977419	p = 0.03	.
IgG2	gest_age	log10_cb	Pertussis_toxin	vaccine_antigens	-0.0223049662411234	-0.0375921367543239	-0.00701779572792293	0.00438475952298437	-319.542011329126	-308.532368560184	0.0244631266939653	0.00776694305545036	p = 0.004	*	0.0613866333217813	ns	ns
IgG1	motHIV+	log10_cb	Shiga_toxin	other_antigens	-0.0160872393107178	-0.0271556375489645	-0.0050188410724712	0.00453002969089677	-973.784915517656	-962.643717101128	0.0232248533211431	0.00562453896993995	p = 0.005	*	0.0126840831345109	p = 0.013	.
IgG	graviditymultigravidae	log10_cb	Tetanus_toxin	vaccine_antigens	-0.0255156487221941	-0.0430933516125694	-0.00793794583181874	0.00458319845411739	-767.514198782947	-756.422918323431	0.0235434845963816	0.00893171091209231	p = 0.005	*	0.0320823891788218	p = 0.032	.
IgG3	cd4_cells	log10_cb	MSP1_42_3D7	exposure_antigen	-0.000118570830955305	-0.000201305931855898	-3.58357300547126e-05	0.00538093664674786	-154.050366611212	-145.948925513834	0.0609094013161992	4.17395861650463e-05	p = 0.005	*	0.07533311305447	ns	ns
IgG2	treatmentmq_split	log10_cb	HiB	vaccine_antigens	-0.069499663838965	-0.118229433619895	-0.0207698940580351	0.00544145153957368	-213.595109927415	-200.890510997119	0.0489829365600188	0.0246896595888121	p = 0.005	*	0.0761803215540315	ns	ns
IgG	hemoglobin	log10_cb_mot_ratio	Pneumo	other_antigens	0.00269084120570178	0.000798493691058957	0.00458318872034459	0.00547859397692079	-1266.30109530166	-1255.3331198692	0.0234172040315207	0.000961386663768616	p = 0.005	*	0.0191750789192228	p = 0.019	.
IgG3	motHIV+	log10_cb_mot_ratio	HiB	vaccine_antigens	0.100298542771741	0.0292301813029751	0.171366904240508	0.00583062325039895	137.198947589991	148.249686892007	0.022404877374794	0.0361097446608988	p = 0.006	*	0.0473613403632329	p = 0.047	.
IgG2	weight_g_catlow	log10_cb_mot_ratio	Rotavirus	other_antigens	0.042210463478273	0.012268008711713	0.072152918244833	0.00588728302190232	-693.349226460322	-682.339583691381	0.0226539209147495	0.015212844058451	p = 0.006	*	0.0412109811533162	p = 0.041	.
IgG4	motHIV+	log10_cb_mot_ratio	OSP	other_antigens	0.115168427682849	0.0334669565434017	0.196869898822296	0.00589056624903654	212.74103131172	223.750674080661	0.0226505043683514	0.0415100147760276	p = 0.006	*	0.0412339637432557	p = 0.041	.
IgG	motHIV+	log10_cb	Cp17	other_antigens	-0.0237188791833465	-0.0405516703859626	-0.00688608798073041	0.00590436833935286	-714.434915035936	-703.333584315764	0.0219563240404969	0.00855331916429444	p = 0.006	*	0.020665289187735	p = 0.021	.
IgG2	mat_anemiaabnormal	log10_cb_mot_ratio	Pertussis_toxin	vaccine_antigens	-0.0172996693718756	-0.0295872739224339	-0.0050120648213173	0.00595425909611428	-885.112775563056	-874.165852848572	0.0230606377760882	0.00624239497202334	p = 0.006	*	0.0833596273455999	ns	ns
IgG4	gest_age	log10_cb	VSP5	other_antigens	0.0423673242784021	0.0121992599642152	0.0725353885925891	0.0060724888207278	82.4842026518242	93.5451287208437	0.0220842281289191	0.015328573078198	p = 0.006	*	0.0205772626235224	p = 0.021	.
IgG4	log10_mother	log10_cb_mot_ratio	Pneumo	other_antigens	-0.0661122700324975	-0.113331779024653	-0.0188927610403422	0.00623289138576059	-580.408996150764	-569.462073436281	0.0227746816760002	0.023988632145608	p = 0.006	*	0.00623289138576059	p = 0.006	*
IgG2	log10_mother	log10_cb_mot_ratio	Diphteria_toxin	vaccine_antigens	-0.0734002092338519	-0.125821383453975	-0.0209790350137289	0.00623298734105243	-738.829184533263	-727.946321192191	0.0232650349788565	0.0266287064745862	p = 0.006	*	0.00671244790574877	p = 0.007	*
IgG2	age_catbetween_20_30	log10_cb_mot_ratio	HepB	vaccine_antigens	-0.0201796967725035	-0.0346111913989115	-0.00574820214609556	0.00630682639377449	-839.374370391977	-824.951162126793	0.0240919961946069	0.00733001501213549	p = 0.006	*	0.0882955695128429	ns	ns
IgG4	log10_pf_exposure	log10_cb	MSP1_42_3D7	exposure_antigen	0.20560956027694	0.0582300388019194	0.35298908175196	0.00641445974131569	-432.857672304982	-421.84802953604	0.0221286944729578	0.0748790202770072	p = 0.006	*	0.0898024363784197	ns	ns
IgG3	cd4_cells_cat<350	log10_cb	MSP1_42_3D7	exposure_antigen	0.0667057847345703	0.0191147173805235	0.114296852088617	0.00644538856252767	-153.717439348706	-145.615998251328	0.0580628333773439	0.024009536882024	p = 0.006	*	0.0902354398753874	ns	ns
IgG	mat_anemiaabnormal	log10_cb_mot_ratio	HepB	vaccine_antigens	-0.00943451905421305	-0.0162083260367008	-0.00266071207172533	0.00650683888179553	-1213.31316230828	-1202.39809830028	0.022745688617451	0.00344109536384881	p = 0.007	*	0.0441383763248194	p = 0.044	.
IgG2	weight_g_catlow	log10_cb	Cp17	other_antigens	0.0585338474661591	0.016440794516683	0.100626900415635	0.00658200541797915	-507.142767282892	-496.061570866484	0.0214540543544351	0.0213883321826919	p = 0.007	*	0.0307160252839027	p = 0.031	.
IgG4	age_catbetween_20_30	log10_cb_mot_ratio	MSP1_42_3D7	exposure_antigen	-0.00963562027661604	-0.0165697870563328	-0.00270145349689928	0.00662720977052284	-1289.05140022061	-1274.42743297733	0.0192725947956667	0.00352277507589867	p = 0.007	*	0.0704973476212686	ns	ns
IgG4	gest_age	log10_cb	HiB	vaccine_antigens	0.0593275841337011	0.016607071147754	0.102048097119648	0.00665480951354777	286.758986136402	297.809725438418	0.0216061602153721	0.0217062386668803	p = 0.007	*	0.0205772626235224	p = 0.021	.
IgG	age_cat>30	log10_cb	Diphteria_toxin	vaccine_antigens	0.0392026041707412	0.0109184181343393	0.0674867902071431	0.00676124324875945	-595.559309969998	-580.824990900644	0.0283970352522396	0.0143709536581491	p = 0.007	*	0.0236643513706581	p = 0.024	.
IgG3	motHIV+	log10_cb_mot_ratio	OSP	other_antigens	0.0911639587163677	0.0253839999290406	0.156943917503695	0.00676590576617613	91.7306497393735	102.78138904139	0.0215062524810283	0.0334227139408406	p = 0.007	*	0.0473613403632329	p = 0.047	.
IgG2	haart_2no	log10_cb_mot_ratio	Measles	vaccine_antigens	-0.0424209469940317	-0.0729255156879485	-0.0119163783001149	0.00703138914233758	-251.754485579682	-244.60840567566	0.0778020406823607	0.0153224068145649	p = 0.007	*	0.0984394479927261	ns	ns
IgG4	hivload_cat1000/9999	log10_cb	Pneumo	other_antigens	-0.197893326151794	-0.341546826451929	-0.0542398258516584	0.00738069210515506	21.3431452853333	34.980084378895	0.038287180797154	0.0724802505813227	p = 0.007	*	0.103329689472171	ns	ns
IgG4	gest_age	log10_cb	Shiga_toxin	other_antigens	0.0387965183907722	0.0104310250857915	0.067162011695753	0.00751464915471585	46.1340018299453	57.1949278989648	0.0208028289055524	0.0144126760171371	p = 0.008	*	0.0205772626235224	p = 0.021	.
IgG1	hivload_cat>9999	log10_cb_mot_ratio	RSV	other_antigens	-0.0167138059787784	-0.0289447337133434	-0.00448287824421337	0.00788363502653558	-548.470624842769	-535.153429372209	0.0794724023737965	0.00616635088073102	p = 0.008	*	0.110370890371498	ns	ns
IgG3	gest_age	log10_cb_mot_ratio	Tetanus_toxin	vaccine_antigens	0.0265092427362145	0.00698712285044679	0.0460313626219822	0.00795615034598216	-181.167279361924	-170.199303929464	0.021103227518349	0.00991800161515879	p = 0.008	*	0.11138610484375	ns	ns
IgG3	hivload	log10_cb	Shiga_toxin	other_antigens	3.9622957667978e-07	1.05707281173948e-07	6.86751872185611e-07	0.00795808370844137	-91.6528853350038	-83.4442899898203	0.0528272604345462	1.46626843747633e-07	p = 0.008	*	0.111413171918179	ns	ns
IgG4	prematurityYes	log10_cb	Pneumo	other_antigens	-0.150327685476469	-0.261080245612321	-0.039575125340618	0.00798008840834724	-54.4347121946017	-43.4250694256602	0.0207942060287176	0.0562699831913112	p = 0.008	*	0.0372404125722871	p = 0.037	.
IgG	treatmentmq	log10_cb	Shiga_toxin	other_antigens	0.0268054163542944	0.00712898215278046	0.0464818505558083	0.0079972896191001	-358.308806975503	-349.896743841303	0.0493050899483857	0.00993794233928885	p = 0.008	*	0.111962054667401	ns	ns
IgG2	seasonrainy	log10_cb_mot_ratio	Pneumo	other_antigens	0.0254842868519483	0.00668124389455905	0.0442873298093376	0.00808214809376269	-671.883766989901	-661.044382670737	0.0219248069205178	0.00955087885106396	p = 0.008	*	0.113150073312678	ns	ns
IgG3	gest_age	log10_cb	VSP5	other_antigens	0.0263714114948327	0.0068652044199948	0.0458776185696706	0.00822609036522515	-174.785984917699	-163.72505884868	0.0202601600901832	0.00991121994143009	p = 0.008	*	0.038388421704384	p = 0.038	.
IgG	hemoglobin	log10_cb_mot_ratio	RSV	other_antigens	0.00175028596529035	0.00044672666656216	0.00305384526401855	0.00867679276901605	-1478.70132694488	-1467.74385940408	0.0206394745443366	0.00066224917187573	p = 0.009	*	0.0242950197532449	p = 0.024	.
IgG	haart_2no	log10_cb	Rotavirus	other_antigens	-0.0343051040047893	-0.0597080984316891	-0.00890210957788954	0.00873288797455236	-287.067048665806	-279.739094896335	0.0688846938383526	0.0127720000575691	p = 0.009	*	0.122260431643733	ns	ns
IgG4	gest_age	log10_cb	HepB	vaccine_antigens	0.0176622575291414	0.00447895838116447	0.0308455566771182	0.00881882683865245	-402.235174409134	-391.204913002329	0.0200469795228534	0.00669822538505064	p = 0.009	*	0.0205772626235224	p = 0.021	.
IgG3	hemoglobin	log10_cb_mot_ratio	RSV	other_antigens	-0.00780184851400303	-0.0136347526928839	-0.00196894433512215	0.0089286476966206	-634.2019607728	-623.171699365995	0.0199721328861187	0.0029636061808962	p = 0.009	*	0.125001067752688	ns	ns
IgG4	haart_2no	log10_cb	RSV	other_antigens	-0.182030088513781	-0.317381255504952	-0.0466789215226109	0.00900965868731009	-7.83964044646856	-0.547190049938616	0.0690648374920625	0.0680389606308177	p = 0.009	*	0.0767005664734887	ns	ns
IgG	age_catbetween_20_30	log10_cb	Tetanus_toxin	vaccine_antigens	-0.0237700200381834	-0.0416065280008645	-0.00593351207550219	0.00917605431144655	-768.497422969127	-753.709049023106	0.0299927974142057	0.00906309071340006	p = 0.009	*	0.0428215867867506	p = 0.043	.
IgG	mat_anemia_recatabnormal	log10_cb_mot_ratio	HepB	vaccine_antigens	-0.0100809172367742	-0.0176573583846593	-0.00250447608888909	0.00929533503652194	-1212.66832137047	-1201.75325736247	0.0205005028394634	0.00384883368774202	p = 0.009	*	0.0420780481726854	p = 0.042	.
IgG1	mat_anemiaabnormal	log10_cb	VSP5	other_antigens	0.0527383974936502	0.0130100017618372	0.0924667932254632	0.00944581286645857	-209.94113483293	-198.819804038683	0.0190452423003973	0.0201879144139715	p = 0.009	*	0.13224138013042	ns	ns
IgG2	age	log10_cb	VSP5	other_antigens	0.00530226955045095	0.00130151851469649	0.0093030205862054	0.00956329792364886	-43.403639970245	-32.3224435538369	0.0192281353707089	0.00203286257795729	p = 0.01	*	0.133886170931084	ns	ns
IgG2	motHIV+	log10_cb_mot_ratio	Pertussis_toxin	vaccine_antigens	-0.015894952307438	-0.0279020670202697	-0.00388783759460627	0.00965227002881204	-890.509603407318	-879.541627974858	0.0199100624277875	0.00610008461233146	p = 0.01	*	0.0284729971036177	p = 0.028	.
IgG1	motHIV+	log10_cb	Measles	vaccine_antigens	-0.0313727613693222	-0.055095192665258	-0.00765033007338631	0.00971265562425438	-511.814737531743	-500.673539115215	0.0187574161334128	0.012054837241459	p = 0.01	*	0.0226628631232602	p = 0.023	.
IgG4	motHIV+	log10_cb	MSP1_42_3D7	exposure_antigen	-0.0348884196903529	-0.0613444548061517	-0.008432384574554	0.00992188232672647	-444.792723298739	-433.691392578567	0.0188825124108771	0.0134432198108677	p = 0.01	*	0.0694531762870852	ns	ns
IgG	mat_anemia_recatabnormal	log10_cb_mot_ratio	Pertussis_toxin	vaccine_antigens	-0.00769725553353772	-0.0135362333002514	-0.00185827776682405	0.00995709624785252	-1371.63906263775	-1360.68159509695	0.0197876180570451	0.00296638457059805	p = 0.01	*	0.0420780481726854	p = 0.042	.
IgG3	haart_2no	log10_cb	MSP1_42_3D7	exposure_antigen	-0.0915654994937665	-0.1607388906082	-0.0223921083793332	0.0100825325319453	-114.35382864724	-106.956104291277	0.0644734854197521	0.0347907798814712	p = 0.01	.	0.141155455447234	ns	ns
IgG3	treatmentmq_full	log10_cb_mot_ratio	Pneumo	other_antigens	-0.0383561847843384	-0.0674725590957987	-0.00923981047287812	0.0101246207532255	-398.086759890622	-385.404823910469	0.0266619278009992	0.0147516451208449	p = 0.01	.	0.141744690545157	ns	ns
IgG2	motHIV+	log10_cb_mot_ratio	Pneumo	other_antigens	0.0230947761950641	0.00552625780289742	0.0406632945872307	0.0101689275370063	-662.564416291996	-651.670780946532	0.0200800312219539	0.00892453029383442	p = 0.01	.	0.0284729971036177	p = 0.028	.
IgG2	graviditymultigravidae	log10_cb_mot_ratio	VSP5	other_antigens	-0.032751858149354	-0.0577428288944274	-0.00776088740428066	0.0103931614400575	-548.78546116862	-537.807014521342	0.0193867780629989	0.0126965827180048	p = 0.01	.	0.09066678774358	ns	ns
IgG	hivload_cat1000/9999	log10_cb	OSP	other_antigens	0.0398095560157478	0.00950109945331273	0.0701180125781829	0.0105282212261171	-325.151512905319	-311.603861898757	0.0424004081076835	0.0152888977068795	p = 0.011	.	0.0736975485828197	ns	ns
IgG4	cd4_cells	log10_cb	Pneumo	other_antigens	0.000223958422400801	5.3051589464109e-05	0.000394865255337493	0.0107095740276916	5.17999851825031	13.226392199623	0.0509953204370446	8.6203504984416e-05	p = 0.011	.	0.137895176000707	ns	ns
IgG1	motHIV+	log10_cb_mot_ratio	VSP5	other_antigens	-0.0230463157394173	-0.0407674920678472	-0.00532513941098746	0.0109850176197358	-679.463623840947	-668.412884538931	0.0185938369631373	0.0090041073001465	p = 0.011	.	0.0219700352394716	p = 0.022	.
IgG	mat_anemiaabnormal	log10_cb	Diphteria_toxin	vaccine_antigens	-0.0272921575646262	-0.048291790934629	-0.00629252419462352	0.0110378401799912	-587.718324636716	-576.688063229911	0.0186922656713844	0.0106695809400103	p = 0.011	.	0.154529762519877	ns	ns
IgG1	log10_pf_exposure	log10_cb	Rotavirus	other_antigens	-0.117504463227241	-0.208108830829294	-0.0269000956251875	0.0112058520973457	-716.729783895372	-705.679044593356	0.0184747741013794	0.0460359646916897	p = 0.011	.	0.0522939764542801	ns	ns
IgG4	treatmentmq_split	log10_cb_mot_ratio	MSP1_42_3D7	exposure_antigen	0.0129612601528753	0.00295972798481371	0.0229627923209368	0.0113948479320129	-760.982461489662	-748.369295111671	0.0360562656590357	0.00506658942115261	p = 0.011	.	0.159527871048181	ns	ns
IgG1	gest_age	log10_cb_mot_ratio	MSP1_42_3D7	exposure_antigen	-0.00605401588944817	-0.010744817191148	-0.00136321458774829	0.0116064717942929	-995.303736126059	-984.346268585253	0.0188415064841089	0.00238307477114018	p = 0.012	.	0.0812453025600506	ns	ns
IgG	mat_anemiaabnormal	log10_cb_mot_ratio	Shiga_toxin	other_antigens	-0.00604289785291641	-0.0107278806016802	-0.0013579151041526	0.0116525123995368	-1454.92429527936	-1443.91465251042	0.0184926934706729	0.00238029622250859	p = 0.012	.	0.0441383763248194	p = 0.044	.
IgG1	log10_mother	log10_cb_mot_ratio	Diphteria_toxin	vaccine_antigens	-0.0585426713958604	-0.104118767114624	-0.012966575677097	0.0120011669605789	-989.195924616553	-978.217477969275	0.0185056030214689	0.0231547895901987	p = 0.012	.	0.0168016337448104	p = 0.017	.
IgG	mat_anemia_recatabnormal	log10_cb_mot_ratio	Shiga_toxin	other_antigens	-0.00668948954507296	-0.011898748943493	-0.00148023014665289	0.0120222994779101	-1454.86840306757	-1443.85876029863	0.018303507604855	0.00264666512836114	p = 0.012	.	0.0420780481726854	p = 0.042	.
IgG2	cd4_cells_cat<350	log10_cb	HiB	vaccine_antigens	-0.0612093981987296	-0.108887787629075	-0.0135310087683842	0.0123498801458818	-153.314144046855	-145.212702949478	0.0478315776024341	0.0240535905821839	p = 0.012	.	0.120061481523387	ns	ns
IgG3	motHIV+	log10_cb	Rotavirus	other_antigens	0.0489686847487922	0.010627659545933	0.0873097099516514	0.0124812821430546	-220.874496085837	-209.733297669309	0.0173010859866565	0.0194834506094798	p = 0.012	.	0.0873689750013823	ns	ns
IgG	mat_anemiaabnormal	log10_cb_mot_ratio	RSV	other_antigens	-0.00556317165324483	-0.00992488439547766	-0.00120145891101201	0.0126109646642341	-1478.03015483382	-1467.07268729301	0.0183303725455691	0.00221588742017466	p = 0.013	.	0.0441383763248194	p = 0.044	.
IgG	motHIV+	log10_cb	Pertussis_toxin	vaccine_antigens	-0.0220618487642745	-0.0393897688051651	-0.00473392872338376	0.0127589429083253	-696.196566787066	-685.105286327549	0.017461901493814	0.00880478942432402	p = 0.013	.	0.0325076609788911	p = 0.033	.
IgG2	hivload_cat1000/9999	log10_cb	Shiga_toxin	other_antigens	-0.0819718861845966	-0.146223355681613	-0.0177204166875805	0.0128930060561047	-157.598716601337	-144.051065594775	0.0440338263305912	0.0324112230074457	p = 0.013	.	0.115621933415964	ns	ns
IgG4	cd4_cells_cat<350	log10_cb	MSP1_42_3D7	exposure_antigen	0.0590019983479716	0.0127293411201974	0.105274655575746	0.0129507105389195	-158.48570188802	-150.467215384635	0.0484071780633963	0.0233368472793786	p = 0.013	.	0.181309947544873	ns	ns
IgG2	graviditymultigravidae	log10_cb_mot_ratio	HepB	vaccine_antigens	-0.0182695252689473	-0.0326525389716723	-0.00388651156622236	0.0129847626694138	-838.954693041507	-828.137286842619	0.0190184845886135	0.00730551295401104	p = 0.013	.	0.09066678774358	ns	ns
IgG4	graviditymultigravidae	log10_cb	HepB	vaccine_antigens	0.0400051917415547	0.00840056381446049	0.0716098196686488	0.0132809807953004	-417.266739427562	-406.155392003593	0.0171111213170061	0.016059617081352	p = 0.013	.	0.185933731134206	ns	ns
IgG1	age_cat>30	log10_cb_mot_ratio	Pneumo	other_antigens	-0.0191285233831395	-0.0342981577802781	-0.0039588889860009	0.0136388557747583	-965.377704217955	-950.684411149269	0.014303483925257	0.00770722655528945	p = 0.014	.	0.0938757386687227	ns	ns
IgG	motHIV+	log10_cb	Measles	vaccine_antigens	-0.0267107191109438	-0.0479609093171869	-0.00546052890470063	0.013931854705239	-575.078786103947	-563.977455383775	0.0168881216669298	0.0107979512695264	p = 0.014	.	0.0325076609788911	p = 0.033	.
IgG	age_catbetween_20_30	log10_cb	Cp17	other_antigens	-0.0246906181643899	-0.044383106647303	-0.00499812968147692	0.01417133000331	-711.166769645907	-696.364995352345	0.0144811035474857	0.0100062912296347	p = 0.014	.	0.0495996550115851	p = 0.05	.
IgG	treatmentmq_split	log10_cb	Pneumo	other_antigens	-0.0233932230131536	-0.042033565257216	-0.00475288076909114	0.0142083002373137	-553.01858436127	-540.336648381117	0.0270420871894258	0.00944402317314872	p = 0.014	.	0.198916203322391	ns	ns
IgG1	age	log10_cb	OSP	other_antigens	0.00244118513872243	0.000492707147024931	0.00438966313041993	0.0142403568828224	-472.9647886398	-461.823590223272	0.0165385511533331	0.000990142400054172	p = 0.014	.	0.0664549987865047	ns	ns
IgG1	age_catbetween_20_30	log10_cb_mot_ratio	VSP5	other_antigens	-0.0257775828446163	-0.0463892261182479	-0.00516593957098469	0.0144185786444069	-677.034456088624	-662.30013701927	0.0137827225670979	0.0104726001279456	p = 0.014	.	0.0995047005600711	ns	ns
IgG	age	log10_cb	Shiga_toxin	other_antigens	0.00123627668025936	0.000247161539093055	0.00222539182142566	0.014472008172457	-878.984643567503	-867.863312773256	0.0165547272369942	0.000502617119257068	p = 0.014	.	0.0405216228828796	p = 0.041	.
IgG	weight_g	log10_cb_mot_ratio	RSV	other_antigens	5.50982753651194e-06	1.09772541653519e-06	9.92192965648869e-06	0.0145656338030063	-1482.88497773747	-1471.91700230501	0.0173841501880637	2.24152070616454e-06	p = 0.015	.	0.203918873242088	ns	ns
IgG3	age_catbetween_20_30	log10_cb	Pneumo	other_antigens	-0.0405032232408953	-0.0729593055607325	-0.00804714092105802	0.0146230888290248	-413.43652252027	-398.581591298233	0.0132657470987142	0.0164927245571104	p = 0.015	.	0.204723243606347	ns	ns
IgG1	hivload_cat1000/9999	log10_cb_mot_ratio	Measles	vaccine_antigens	-0.0319177076445601	-0.0575058746433332	-0.00632954064578704	0.0150009353254175	-359.990150221856	-346.626006049547	0.0312906203088961	0.0129020468938574	p = 0.015	.	0.115634473365489	ns	ns
IgG3	haartno	log10_cb	MSP1_42_3D7	exposure_antigen	-0.0835326918785572	-0.150633924384797	-0.0164314593723178	0.0151330974166487	-158.878277657909	-150.515802429563	0.0409194943754652	0.0338848522120507	p = 0.015	.	0.211863363833082	ns	ns
IgG2	weight_g	log10_cb	Tetanus_toxin	vaccine_antigens	-3.36431590758524e-05	-6.07816396265058e-05	-6.50467852519896e-06	0.0152889205383772	-447.314994883062	-436.274477056011	0.0166795338700518	1.37888304738231e-05	p = 0.015	.	0.101468897746167	ns	ns
IgG3	graviditymultigravidae	log10_cb_mot_ratio	VSP5	other_antigens	0.0460435436419587	0.00887728988427981	0.0832097973996375	0.015356250963365	-323.73398451044	-312.683245208424	0.0165966532366266	0.0188841265713123	p = 0.015	.	0.102348034377124	ns	ns
IgG2	hemoglobin	log10_cb_mot_ratio	HepB	vaccine_antigens	0.00484707417569071	0.000917977428269301	0.00877617092311213	0.0158047795474902	-830.779129638434	-819.983863761439	0.0178872769157639	0.00199562507214572	p = 0.016	.	0.110633456832432	ns	ns
IgG1	mat_anemiaabnormal	log10_cb_mot_ratio	Pertussis_toxin	vaccine_antigens	-0.00956146628404723	-0.0173159901049415	-0.00180694246315293	0.0158420556921357	-1169.51581950718	-1158.48555810038	0.0165242541962828	0.00393995066963683	p = 0.016	.	0.137474953782263	ns	ns
IgG4	haart_2no	log10_cb	Cp17	other_antigens	-0.153418796357319	-0.277453031391386	-0.0293845613232521	0.0159624918845334	-12.8409536042554	-5.51299983478446	0.0567348961253099	0.0623613590734064	p = 0.016	.	0.0767005664734887	ns	ns
IgG1	hemoglobin	log10_cb_mot_ratio	Pertussis_toxin	vaccine_antigens	0.00287073177944594	0.000538285151055313	0.00520317840783658	0.016031322205171	-1169.4947538744	-1158.46449246759	0.0164533011612173	0.0011850791702591	p = 0.016	.	0.112219255436197	ns	ns
IgG1	mat_anemia_recatabnormal	log10_cb_mot_ratio	Shiga_toxin	other_antigens	-0.00574056412588818	-0.0104114250866029	-0.00106970316517349	0.0161821000298605	-1527.9514969191	-1516.92123551229	0.0163973884740463	0.00237319043631824	p = 0.016	.	0.113274700209024	ns	ns
IgG4	haart_2no	log10_cb	Shiga_toxin	other_antigens	-0.171737111580694	-0.311240694534406	-0.0322335286269811	0.0164358356728904	7.70265048111062	15.1003748370744	0.0548527351316164	0.070163373069135	p = 0.016	.	0.0767005664734887	ns	ns
IgG1	hivload_cat1000/9999	log10_cb_mot_ratio	Diphteria_toxin	vaccine_antigens	-0.0266564578948199	-0.0483468079430069	-0.00496610784663297	0.0165192104807842	-387.906709542646	-374.636907791859	0.0326979278449055	0.0109341185956513	p = 0.017	.	0.115634473365489	ns	ns
IgG	log10_mother	log10_cb_mot_ratio	Cp17	other_antigens	-0.0569350138208774	-0.103471769894271	-0.0103982577474838	0.016668395652266	-1232.78649269838	-1221.78721263404	0.0163891990594044	0.0236435525955285	p = 0.017	.	0.0212143217392476	p = 0.021	.
IgG2	log10_pf_exposure	log10_cb	VSP5	other_antigens	0.34800218064277	0.0632845421025228	0.632719819183018	0.0167723586141453	-44.9393687492132	-33.9504873088053	0.0164085570064096	0.144652041956514	p = 0.017	.	0.234813020598034	ns	ns
IgG	graviditymultigravidae	log10_cb	Pertussis_toxin	vaccine_antigens	-0.024221983695884	-0.0440504254989571	-0.00439354189281083	0.0168277943771931	-695.704456932698	-684.613176473181	0.0158380218489037	0.0100753728246976	p = 0.017	.	0.0785297070935676	ns	ns
IgG2	gest_age	log10_cb_mot_ratio	Measles	vaccine_antigens	0.00906464411068606	0.00163512631317317	0.016494161908199	0.016974009856002	-752.866099522693	-741.994047004131	0.0169858180665725	0.00377395743885027	p = 0.017	.	0.237636137984028	ns	ns
IgG4	haartno	log10_cb	Shiga_toxin	other_antigens	-0.16157896621105	-0.293726661596395	-0.0294312708257051	0.0169876580561125	3.77399182318296	12.1364670515291	0.0392590638793098	0.066732084658492	p = 0.017	.	0.08136179856078	ns	ns
IgG2	cd4_cells_cat<350	log10_cb	Pneumo	other_antigens	-0.0424854175582426	-0.0772692981360427	-0.00770153698044251	0.0171516402176268	-219.588143428598	-211.541749747226	0.04348122726051	0.0175446023499624	p = 0.017	.	0.120061481523387	ns	ns
IgG4	gest_age	log10_cb	OSP	other_antigens	0.0511160529887146	0.00898465435643048	0.0932474516209987	0.0175845498398914	272.853383776003	283.893901603054	0.0158471957946766	0.021406604260003	p = 0.018	.	0.0328862930708179	p = 0.033	.
IgG	cd4_cells	log10_cb	Pneumo	other_antigens	4.6117397777226e-05	8.17380096537929e-06	8.40609945890726e-05	0.0176939330120244	-317.305600965264	-309.287114461878	0.0433892718401563	1.91362237891298e-05	p = 0.018	.	0.242751142971785	ns	ns
IgG2	mat_anemiaabnormal	log10_cb	OSP	other_antigens	-0.0523464772797471	-0.0955416434792523	-0.00915131108024188	0.0177112430709679	-160.879802546174	-149.798606129765	0.0155914279858022	0.0219483382322142	p = 0.018	.	0.198467741189434	ns	ns
IgG3	hivload_cat400/999	log10_cb_mot_ratio	Tetanus_toxin	vaccine_antigens	-0.113695347127242	-0.207601749850509	-0.019788944403975	0.0181344682671882	-89.8845720355404	-76.5204278632309	0.0447978622487277	0.0473494178628403	p = 0.018	.	0.181310344203306	ns	ns
IgG2	age_cat>30	log10_cb	VSP5	other_antigens	0.0880157802333614	0.0150588492565144	0.160972711210208	0.0182247964025321	-40.4074182430881	-25.6324896878773	0.0125856591828283	0.0370703739076008	p = 0.018	.	0.255147149635449	ns	ns
IgG1	graviditymultigravidae	log10_cb_mot_ratio	Diphteria_toxin	vaccine_antigens	-0.0140822224728853	-0.0257571408373656	-0.00240730410840507	0.0182504769553099	-988.450686972029	-977.47224032475	0.0159536969265487	0.0059314049163056	p = 0.018	.	0.127753338687169	ns	ns
IgG	hivload	log10_cb_mot_ratio	RSV	other_antigens	-5.07805886986637e-08	-9.27859428814579e-08	-8.77523451586961e-09	0.0183142179866518	-483.130940302026	-475.226753337337	0.0445064281540212	2.11749244833142e-08	p = 0.018	.	0.191502139187474	ns	ns
IgG	age	log10_cb	OSP	other_antigens	0.00122050237992927	0.000205884460908636	0.00223512029894991	0.0185576130850854	-861.092234449522	-849.980887025554	0.0151647028176293	0.00051556927994652	p = 0.019	.	0.0421696568597685	p = 0.042	.
IgG3	treatmentmq_full	log10_cb	Cp17	other_antigens	0.0442525044822999	0.00747143337420994	0.0810335755903899	0.0186545104561067	-316.15224439472	-303.425110193552	0.02032994564679	0.018636420177276	p = 0.019	.	0.261163146385494	ns	ns
IgG2	motHIV+	log10_cb	Pertussis_toxin	vaccine_antigens	-0.0385238013605802	-0.0705893083900452	-0.00645829433111524	0.0187058950751165	-327.549346935268	-316.46815051886	0.015271539798426	0.0162931331394715	p = 0.019	.	0.137836953372132	ns	ns
IgG4	gest_age	log10_cb	Cp17	other_antigens	0.0324124511712052	0.00541485533407534	0.059410047008335	0.0187921674690388	11.3635933145081	22.3732360834496	0.0156131597709407	0.0137166514444242	p = 0.019	.	0.0328862930708179	p = 0.033	.
IgG1	hivload_cat400/999	log10_cb	Shiga_toxin	other_antigens	-0.0308259660240351	-0.0565080431213042	-0.00514388892676597	0.0190976161766183	-380.364762165932	-366.68376992396	0.0361330318470234	0.012959192155004	p = 0.019	.	0.136404446646175	ns	ns
IgG4	haartno	log10_cb	RSV	other_antigens	-0.14779175413041	-0.27115710131614	-0.0244264069446791	0.0193026612373243	-27.2768694093549	-18.9903476049616	0.0383911513101354	0.0622803299289636	p = 0.019	.	0.08136179856078	ns	ns
IgG2	age_cat>30	log10_cb_mot_ratio	HepB	vaccine_antigens	-0.0209264269679625	-0.0384338680012926	-0.00341898593463239	0.0193272465340981	-839.374370391977	-824.951162126793	0.0240919961946069	0.00889234337263709	p = 0.019	.	0.270581451477374	ns	ns
IgG2	graviditymultigravidae	log10_cb_mot_ratio	Pertussis_toxin	vaccine_antigens	-0.0163328059445602	-0.030009779210325	-0.00265583267879549	0.0194285973736243	-889.263268668787	-878.295293236328	0.0156296932489293	0.00694843816829701	p = 0.019	.	0.09066678774358	ns	ns
IgG1	hivload_cat400/999	log10_cb	Rotavirus	other_antigens	-0.0507368742340717	-0.0931469700335557	-0.00832677843458766	0.0194863495208822	-266.001539248293	-252.320547006321	0.0261935701015185	0.0214001608474294	p = 0.019	.	0.136404446646175	ns	ns
IgG3	log10_pf_exposure	log10_cb_mot_ratio	MSP1_42_3D7	exposure_antigen	-0.0694947403006947	-0.127730928840914	-0.0112585517604754	0.0195103761422359	-976.623115368652	-965.572376066636	0.0151789104184012	0.0295897338105295	p = 0.02	.	0.136572632995651	ns	ns
IgG4	graviditymultigravidae	log10_cb_mot_ratio	Pertussis_toxin	vaccine_antigens	0.0549893184891318	0.00887030448905731	0.101108332489206	0.0196119567734124	-196.117535380055	-185.08727397325	0.0152521877784869	0.0234323401783848	p = 0.02	.	0.0653894134033595	ns	ns
IgG1	mat_anemiaabnormal	log10_cb_mot_ratio	Shiga_toxin	other_antigens	-0.00500676948228724	-0.00920684572367013	-0.000806693240904351	0.0196392791117518	-1527.60926851704	-1516.57900711024	0.0152439155732399	0.00213399218081889	p = 0.02	.	0.137474953782263	ns	ns
IgG2	motHIV+	log10_cb	HepB	vaccine_antigens	-0.04363410770932	-0.0802522066645164	-0.00701600875412357	0.019690993338876	-254.952014010846	-243.99454647004	0.0156029619349295	0.0186031473461943	p = 0.02	.	0.137836953372132	ns	ns
IgG4	cd4_cells	log10_cb	MSP1_42_3D7	exposure_antigen	-9.55893678633621e-05	-0.000175619629111657	-1.55591066150673e-05	0.0196993108572438	-157.730616700547	-149.712130197162	0.0416681601359801	4.03619350254042e-05	p = 0.02	.	0.137895176000707	ns	ns
IgG	hivload_cat1000/9999	log10_cb	HiB	vaccine_antigens	0.0424984760240543	0.00690919228481793	0.0780877597632907	0.0197185076098422	-290.271492683359	-276.723841676798	0.0405122392703421	0.0179527755703894	p = 0.02	.	0.0920197021792635	ns	ns
IgG1	age	log10_cb_mot_ratio	OSP	other_antigens	0.00079773874950167	0.000127778643029423	0.00146769885597392	0.0197749136962152	-1100.93015846963	-1089.87941916761	0.0150994288841064	0.000340405883542617	p = 0.02	.	0.138424395873506	ns	ns
IgG4	graviditymultigravidae	log10_cb_mot_ratio	OSP	other_antigens	0.111677744097357	0.0176554182302006	0.205700069964513	0.0200808479787122	214.938584345319	225.948227114261	0.0152162435974528	0.0477698636461608	p = 0.02	.	0.0653894134033595	ns	ns
IgG1	age_cat>30	log10_cb_mot_ratio	Diphteria_toxin	vaccine_antigens	-0.0169412608317749	-0.031208054486033	-0.0026744671775169	0.0201162297147263	-987.864160783882	-973.226231920843	0.0173402773028278	0.00724809002987556	p = 0.02	.	0.0938757386687227	ns	ns
IgG3	malaria_placentariaYes	log10_cb_mot_ratio	Diphteria_toxin	vaccine_antigens	-0.0147454179435199	-0.0271675279894648	-0.00232330789757493	0.0201592489252579	-1286.94616242738	-1275.94688236304	0.0152456116342156	0.00631120080126642	p = 0.02	.	0.282229484953611	ns	ns
IgG3	gest_age	log10_cb_mot_ratio	Pertussis_toxin	vaccine_antigens	0.0184684658584085	0.00289858720483817	0.0340383445119788	0.0202510963315412	-310.559389971448	-299.591414538988	0.0153782666434359	0.00791010825348509	p = 0.02	.	0.128900912186513	ns	ns
IgG4	seasonrainy	log10_cb_mot_ratio	Pneumo	other_antigens	0.027154691450791	0.00426286307198902	0.0500465198295931	0.020251950374147	-569.769161411231	-558.907958814079	0.01593622890282	0.0116281291329235	p = 0.02	.	0.172664880440719	ns	ns
IgG1	hivload	log10_cb	Pertussis_toxin	vaccine_antigens	1.81535690274634e-07	2.86050261538804e-08	3.34466354395387e-07	0.0204205778169382	-237.959500165284	-229.750904820101	0.0385581154106285	7.71842331522721e-08	p = 0.02	.	0.285888089437135	ns	ns
IgG2	age_catbetween_20_30	log10_cb_mot_ratio	OSP	other_antigens	0.0313143864964585	0.00483079345969432	0.0577979795332226	0.0206454499291806	-526.11508647772	-511.435562785798	0.0123415611174662	0.0134553045316646	p = 0.021	.	0.120481285307949	ns	ns
IgG4	age_catbetween_20_30	log10_cb_mot_ratio	HepB	vaccine_antigens	0.0366473676124854	0.0055806446462939	0.067714090578677	0.0209425567774462	-432.733444562836	-418.067737810386	0.0169371861404629	0.0157835845260485	p = 0.021	.	0.0704973476212686	ns	ns
IgG4	haartno	log10_cb	Cp17	other_antigens	-0.146760420862632	-0.271066567331661	-0.0224542743936016	0.0210824941716118	-11.0282440791407	-2.74172227474742	0.0370976194165222	0.0627552873712071	p = 0.021	.	0.08136179856078	ns	ns
IgG	age	log10_cb	HepB	vaccine_antigens	0.0018379138307641	0.000278091892042809	0.0033977357694854	0.0210848284298842	-595.491671313316	-584.4409320113	0.0147213150172916	0.000792543556086463	p = 0.021	.	0.0421696568597685	p = 0.042	.
IgG4	graviditymultigravidae	log10_cb_mot_ratio	Shiga_toxin	other_antigens	0.0714623721846982	0.0107496805491989	0.132175063820197	0.0212179525702882	-35.1720604110327	-24.1213211090167	0.0146842489708252	0.0308480419039528	p = 0.021	.	0.0653894134033595	ns	ns
IgG1	age_catbetween_20_30	log10_cb_mot_ratio	Diphteria_toxin	vaccine_antigens	-0.0138916025294231	-0.0257027608375935	-0.0020804442212526	0.0213224358343009	-987.864160783882	-973.226231920843	0.0173402773028278	0.00600053108283245	p = 0.021	.	0.0995047005600711	ns	ns
IgG4	age_catbetween_20_30	log10_cb_mot_ratio	Pertussis_toxin	vaccine_antigens	0.0552222253129923	0.0082406119666313	0.102203838659353	0.0214007442039299	-194.297619014733	-179.59060380566	0.0124539878406233	0.0238702671116496	p = 0.021	.	0.0704973476212686	ns	ns
IgG2	weight_g	log10_cb	Pneumo	other_antigens	-2.29541853935548e-05	-4.2534675466586e-05	-3.37369532052369e-06	0.0217433352313214	-638.094374922142	-627.074405120627	0.0146904678538405	9.94839246525063e-06	p = 0.022	.	0.101468897746167	ns	ns
IgG3	motHIV+	log10_cb_mot_ratio	Tetanus_toxin	vaccine_antigens	-0.0477791991992155	-0.0886720839419951	-0.00688631445643582	0.022179215102195	-187.780520754132	-176.729781452116	0.0144235042004481	0.0207776230659026	p = 0.022	.	0.103503003810243	ns	ns
IgG4	age_cat>30	log10_cb_mot_ratio	HepB	vaccine_antigens	0.0439362782782753	0.00631657229557474	0.0815559842609759	0.022238381845862	-432.733444562836	-418.067737810386	0.0169371861404629	0.0191128562181864	p = 0.022	.	0.196208218672522	ns	ns
IgG3	hivload_cat1000/9999	log10_cb_mot_ratio	Tetanus_toxin	vaccine_antigens	-0.105797304705922	-0.196202850881587	-0.0153917585302581	0.0222616203483703	-89.8845720355404	-76.5204278632309	0.0447978622487277	0.0455842185287886	p = 0.022	.	0.155831342438592	ns	ns
IgG2	weight_g_catlow	log10_cb	VSP5	other_antigens	0.106247895609008	0.0152389613267219	0.197256829891294	0.0222863531716464	-49.0456339104979	-37.9745555475257	0.0142977008447547	0.0462428336499964	p = 0.022	.	0.0588602519584557	ns	ns
IgG	malaria_placentariaYes	log10_cb_mot_ratio	MSP1_42_3D7	exposure_antigen	-0.0179619092030163	-0.0333496648259476	-0.00257415358008497	0.0223071300944641	-1171.12728809266	-1160.10731829114	0.0145383463400283	0.00781816142115539	p = 0.022	.	0.312299821322498	ns	ns
IgG	motHIV+	log10_cb	HiB	vaccine_antigens	-0.0185576979036245	-0.0345510791978959	-0.00256431660935312	0.0231051334835596	-747.582546089854	-736.471198665886	0.0138988521963381	0.00812689774467697	p = 0.023	.	0.0462102669671192	p = 0.046	.
IgG4	age_catbetween_20_30	log10_cb_mot_ratio	OSP	other_antigens	0.11097412786109	0.0153339067310735	0.206614348991107	0.0231117792281998	216.96264150464	231.642165196562	0.0117029598164835	0.0485911522274832	p = 0.023	.	0.0704973476212686	ns	ns
IgG1	treatmentmq	log10_cb_mot_ratio	RSV	other_antigens	-0.00875673646091293	-0.0162935492436995	-0.00121992367812635	0.0231719614727711	-569.128622443123	-560.867851869804	0.036023752886932	0.00380456440466102	p = 0.023	.	0.224797291394891	ns	ns
IgG4	haartno	log10_cb	Measles	vaccine_antigens	-0.158287391896947	-0.294608747533349	-0.0219660362605456	0.0232462281602228	11.0121388848578	19.3495093641924	0.035064776585857	0.0688336089917388	p = 0.023	.	0.08136179856078	ns	ns
IgG2	treatmentmq_split	log10_cb_mot_ratio	VSP5	other_antigens	-0.0326735509536034	-0.0608645029140244	-0.00448259899318243	0.0233797101610752	-397.455507140075	-384.912313391874	0.0191045982796768	0.0142791706782021	p = 0.023	.	0.327315942255053	ns	ns
IgG4	hivload_cat400/999	log10_cb_mot_ratio	RSV	other_antigens	-0.0800298875594713	-0.149108394257886	-0.0109513808610561	0.0236146709925605	-153.428047279825	-140.206092784118	0.0411608805896594	0.0348182955518548	p = 0.024	.	0.330605393895847	ns	ns
IgG1	age_cat>30	log10_cb	Pneumo	other_antigens	-0.029182728716605	-0.0544559100794625	-0.00390954735374744	0.023775143622113	-678.221672458122	-663.379964388623	0.0142763139432257	0.0128425226572537	p = 0.024	.	0.110950670236527	ns	ns
IgG2	weight_g_catlow	log10_cb	Diphteria_toxin	vaccine_antigens	0.0730394770977291	0.00977980472921079	0.136299149466247	0.0237931736410207	-279.746722644686	-268.757841204278	0.0143034249719987	0.0321393533204396	p = 0.024	.	0.0588602519584557	ns	ns
IgG2	hivload_cat1000/9999	log10_cb	Pneumo	other_antigens	-0.0585797834293841	-0.109376143664655	-0.0077834231941131	0.024215817626827	-214.303918735285	-200.756267728723	0.0204032378727519	0.0256238833514675	p = 0.024	.	0.115621933415964	ns	ns
IgG	cd4_cells_cat<350	log10_cb	HiB	vaccine_antigens	0.0299403012037535	0.00394479928627878	0.0559358031212283	0.0244017992010191	-281.884031855568	-273.865545352183	0.038246169736057	0.0131104002783477	p = 0.024	.	0.223499569131271	ns	ns
IgG	prematurityYes	log10_cb_mot_ratio	Cp17	other_antigens	-0.016710965190802	-0.0312515464844355	-0.00217038389716862	0.0244451643466512	-1202.67408527617	-1191.73774458324	0.0143920354224355	0.00738684737232241	p = 0.024	.	0.104641279179374	ns	ns
IgG	log10_pf_exposure	log10_cb_mot_ratio	HepB	vaccine_antigens	-0.0424988822937416	-0.0794933252489324	-0.00550443933855083	0.0245034656199386	-1219.85822571068	-1208.92188501775	0.0143775289204097	0.0187937674715752	p = 0.025	.	0.17152425933957	ns	ns
IgG4	seasonrainy	log10_cb_mot_ratio	MSP1_42_3D7	exposure_antigen	0.00783410363924514	0.00100697944174335	0.0146612278367469	0.0246664114915313	-1245.86854201783	-1234.98567867675	0.0145956943208704	0.00346801629351967	p = 0.025	.	0.172664880440719	ns	ns
IgG1	log10_pf_exposure	log10_cb	Tetanus_toxin	vaccine_antigens	-0.118450168456247	-0.221706467870172	-0.0151938690423211	0.0247012622586425	-639.871232654777	-628.820493352761	0.0137911760317807	0.0524643952584278	p = 0.025	.	0.0864544179052489	ns	ns
IgG	mat_anemia_recatabnormal	log10_cb	Cp17	other_antigens	-0.0222375112837963	-0.0416407854274242	-0.00283423714016848	0.0248339836482318	-706.564659311178	-695.48346289477	0.0136204462273681	0.00985919632186988	p = 0.025	.	0.198304589053037	ns	ns
IgG	age_catbetween_20_30	log10_cb_mot_ratio	MSP1_42_3D7	exposure_antigen	-0.0100556740150508	-0.0188311686213488	-0.00128017940875276	0.0248611324832196	-1169.16450067692	-1154.47120760823	0.0112430531258456	0.00445855999523741	p = 0.025	.	0.141181407719334	ns	ns
IgG	age_cat>30	log10_cb_mot_ratio	Shiga_toxin	other_antigens	-0.007355897149018	-0.0138028106964373	-0.000908983601598721	0.0254779651293379	-1463.21411269627	-1448.50709748719	0.0132666921526928	0.00327552711500339	p = 0.025	.	0.35669151181073	ns	ns
IgG3	weight_g	log10_cb	OSP	other_antigens	8.65178579045675e-05	1.06057307450236e-05	0.000162429985064111	0.0256371354705583	162.716804667975	173.8480857201	0.0132128864750855	3.85751364397259e-05	p = 0.026	.	0.314693324123774	ns	ns
IgG4	age_catbetween_20_30	log10_cb	Pertussis_toxin	vaccine_antigens	-0.0693587853639494	-0.130215402894186	-0.00850216783371304	0.0256379165692491	-33.0806992284283	-18.2389911589289	0.0122134315932535	0.0309241831590098	p = 0.026	.	0.218415425415539	ns	ns
IgG4	age_catbetween_20_30	log10_cb_mot_ratio	Pneumo	other_antigens	0.0273500374846327	0.00322770205111643	0.0514723729181489	0.026414641154144	-576.642320354197	-562.046423401553	0.0131773482670545	0.0122545314051075	p = 0.026	.	0.0704973476212686	ns	ns
IgG4	graviditymultigravidae	log10_cb_mot_ratio	VSP5	other_antigens	0.0741362206009839	0.00874633736723326	0.139526103834734	0.0264160659270733	8.12405976978903	19.1645775968402	0.0134440497204749	0.0332240418887993	p = 0.026	.	0.0653894134033595	ns	ns
IgG2	weight_g_catlow	log10_cb_mot_ratio	Pneumo	other_antigens	0.0350717103619809	0.00413480289959255	0.0660086178243692	0.0264374118705306	-657.816330635821	-646.933467294749	0.0141664836015035	0.0157152112729886	p = 0.026	.	0.123374588729143	ns	ns
IgG2	hivload_cat1000/9999	log10_cb	Cp17	other_antigens	-0.0667507050689657	-0.125580162521978	-0.00792124761595295	0.0265302038501555	-182.046128532464	-168.365136290492	0.0332359271776016	0.0296853810001719	p = 0.027	.	0.115621933415964	ns	ns
IgG3	age_cat>30	log10_cb	Cp17	other_antigens	0.0379309244476083	0.00434068205977205	0.0715211668354445	0.0270151248343745	-505.530469298887	-490.67553807685	0.0117276730719702	0.0170690538078453	p = 0.027	.	0.378211747681243	ns	ns
IgG1	hemoglobin	log10_cb_mot_ratio	Cp17	other_antigens	0.00361735187063475	0.000412982477167615	0.00682172126410188	0.0270664011722273	-983.016188072761	-971.996218271246	0.0133930547861369	0.0016280657026943	p = 0.027	.	0.126309872137061	ns	ns
IgG	hivload	log10_cb_mot_ratio	Shiga_toxin	other_antigens	-4.98195253405976e-08	-9.39636834446467e-08	-5.67536723654842e-09	0.0273574484553535	-481.545068105885	-473.583187055412	0.0371237330544005	2.22583351896838e-08	p = 0.027	.	0.191502139187474	ns	ns
IgG3	gest_age	log10_cb_mot_ratio	Pneumo	other_antigens	0.00898680909608762	0.000997181256826001	0.0169764369353492	0.0276216240399672	-692.194364739557	-681.226389307097	0.0135059334242145	0.00405904390906255	p = 0.028	.	0.128900912186513	ns	ns
IgG1	hemoglobin	log10_cb	VSP5	other_antigens	-0.0134618681156265	-0.0254416466809494	-0.00148208955030362	0.0277648580294247	-208.031363886944	-196.910033092698	0.0128015392694538	0.00608750340707585	p = 0.028	.	0.148910256873335	ns	ns
IgG3	graviditymultigravidae	log10_cb_mot_ratio	Shiga_toxin	other_antigens	0.0307222927131035	0.00337807761974489	0.0580665078064621	0.0277923424965038	-504.188950092629	-493.138210790613	0.0131014192162848	0.0138935611370163	p = 0.028	.	0.102348034377124	ns	ns
IgG2	weight_g_catlow	log10_cb	RSV	other_antigens	0.0341478084750126	0.00375202681845643	0.0645435901315687	0.0278047563862602	-711.570842821828	-700.48964640542	0.0129661314172604	0.0154447118816334	p = 0.028	.	0.0588602519584557	ns	ns
IgG2	prematurityYes	log10_cb_mot_ratio	RSV	other_antigens	0.0299318810264948	0.00326077522799969	0.0566029868249899	0.0279753394339458	-870.430507816713	-859.515443808712	0.0136692450970619	0.0135489273239104	p = 0.028	.	0.210467762217346	ns	ns
IgG4	graviditymultigravidae	log10_cb_mot_ratio	Cp17	other_antigens	0.0574531512710223	0.00624178701267626	0.108664515529368	0.0280240343157255	-137.131105058008	-126.1422236176	0.0133256819990125	0.0260181576713288	p = 0.028	.	0.0653894134033595	ns	ns
IgG1	graviditymultigravidae	log10_cb_mot_ratio	VSP5	other_antigens	-0.0228155626699535	-0.0431689395957245	-0.00246218574418254	0.0281478718492741	-677.800743540216	-666.7500042382	0.0130272215887741	0.0103415250976291	p = 0.028	.	0.131356735296612	ns	ns
IgG	mat_anemia_recatabnormal	log10_cb	Tetanus_toxin	vaccine_antigens	-0.0199610112158824	-0.0377886464745619	-0.00213337595720287	0.0283292270075768	-757.402714187834	-746.331635824862	0.0129017261948751	0.00905845539387214	p = 0.028	.	0.198304589053037	ns	ns
IgG2	treatmentmq_full	log10_cb_mot_ratio	Diphteria_toxin	vaccine_antigens	0.0286196570655908	0.00303921491325779	0.0542000992179238	0.0285574173550753	-419.292930359632	-406.917929556405	0.0189958914934074	0.012952768214089	p = 0.029	.	0.399803842971055	ns	ns
IgG1	age_catbetween_20_30	log10_cb_mot_ratio	RSV	other_antigens	-0.01299629687305	-0.0246223061726396	-0.00137028757346046	0.0285844445999552	-1010.27340863938	-995.552718203312	0.0114608966699781	0.0059069910910196	p = 0.029	.	0.100045556099843	ns	ns
IgG4	gest_age	log10_cb	Pneumo	other_antigens	0.027670805867549	0.00285465445207684	0.0524869572830211	0.0289882786799042	-50.112111744771	-39.1232303043632	0.0131242537111563	0.0126079543022152	p = 0.029	.	0.0450928779465177	p = 0.045	.
IgG1	age	log10_cb	Pneumo	other_antigens	-0.00154493016436213	-0.0029305600928988	-0.000159300235825464	0.0289916653986623	-678.673704469473	-667.542423417348	0.0125134280918681	0.000704114949063835	p = 0.029	.	0.101470828895318	ns	ns
IgG3	weight_g_catlow	log10_cb_mot_ratio	Diphteria_toxin	vaccine_antigens	-0.0119308624598926	-0.0226409480333559	-0.00122077688642927	0.0291383259015424	-1280.9264544998	-1269.9375730594	0.0130935339547933	0.00544130583434671	p = 0.029	.	0.407936562621593	ns	ns
IgG1	hivload_cat>9999	log10_cb	Pertussis_toxin	vaccine_antigens	0.0609124100003906	0.00629585907923351	0.115528960921548	0.0291611878724902	-238.910914050353	-225.22992180838	0.0626852192478737	0.0275595457310615	p = 0.029	.	0.24632337591092	ns	ns
IgG2	motHIV+	log10_cb_mot_ratio	Shiga_toxin	other_antigens	-0.0115248164011507	-0.0218762986801553	-0.00117333412214618	0.0292281339025875	-989.925134665846	-978.905164864331	0.0129400224404784	0.00525934784699096	p = 0.029	.	0.0681989791060376	ns	ns
IgG3	graviditymultigravidae	log10_cb_mot_ratio	HiB	vaccine_antigens	0.0910549536821789	0.00926234745444922	0.172847559909909	0.0292422955363213	140.07198274511	151.122722047126	0.0128047636814375	0.0415587198718631	p = 0.029	.	0.102348034377124	ns	ns
IgG3	hivload	log10_cb	VSP5	other_antigens	3.60462378932308e-07	3.67412802056671e-08	6.84183477658948e-07	0.0294076222625834	-66.9828255478418	-58.7742302026584	0.0330933924168999	1.63382307296448e-07	p = 0.029	.	0.205853355838084	ns	ns
IgG2	seasonrainy	log10_cb_mot_ratio	RSV	other_antigens	0.0150169518539738	0.00151238257025218	0.0285215211376955	0.0294296679295643	-864.662407803939	-853.768772458475	0.0134561481165392	0.00686010823379947	p = 0.029	.	0.20600767550695	ns	ns
IgG2	weight_g_catlow	log10_cb	HiB	vaccine_antigens	0.0582708914091231	0.00586538453299067	0.110676398285255	0.0294301259792278	-380.527821048625	-369.416473624657	0.0125113497616191	0.0266294029889004	p = 0.029	.	0.0588602519584557	ns	ns
IgG1	hemoglobin	log10_cb	MSP1_42_3D7	exposure_antigen	-0.00950793182826396	-0.0180644814618441	-0.000951382194683844	0.0295363453267645	-410.618258116056	-399.49692732181	0.0124491568867796	0.00434799564643109	p = 0.03	.	0.148910256873335	ns	ns
IgG3	graviditymultigravidae	log10_cb	VSP5	other_antigens	0.0531186790066523	0.00524065383963605	0.100996704173669	0.0297875612790304	-168.769972561315	-157.628774144787	0.0123188674107541	0.0243297912271638	p = 0.03	.	0.227103548797473	ns	ns
IgG	prematurityYes	log10_cb_mot_ratio	Measles	vaccine_antigens	-0.0224482641672705	-0.0426943243006679	-0.00220220403387307	0.029897508336964	-1008.25233453522	-997.337270527222	0.013263969673744	0.0102850027822393	p = 0.03	.	0.104641279179374	ns	ns
IgG2	prematurityYes	log10_cb_mot_ratio	Pneumo	other_antigens	0.0410312830321808	0.00398727076694186	0.0780752952974197	0.0300668231739066	-673.851174869671	-662.989972272519	0.013470025510909	0.0188168699805858	p = 0.03	.	0.210467762217346	ns	ns
IgG4	age_catbetween_20_30	log10_cb_mot_ratio	Shiga_toxin	other_antigens	0.0682214101378272	0.0065715185946948	0.12987130168096	0.0302131489805437	-32.8126321763897	-18.0783131070349	0.0100888126698391	0.0313237840133008	p = 0.03	.	0.0704973476212686	ns	ns
IgG4	hivload	log10_cb_mot_ratio	Rotavirus	other_antigens	4.77711362962534e-07	4.60760174956699e-08	9.09346708429398e-07	0.0304077719790866	-2.37400118050921	5.61631610182699	0.035075504963063	2.17663730364311e-07	p = 0.03	.	0.323248469242502	ns	ns
IgG	hivload_cat>9999	log10_cb	Tetanus_toxin	vaccine_antigens	-0.0449659381138344	-0.0856122010425717	-0.004319675185097	0.0304646828882081	-300.839276562169	-287.246782205694	0.0218035580417479	0.0205059059012884	p = 0.03	.	0.187715567102222	ns	ns
IgG3	hivload_cat400/999	log10_cb_mot_ratio	Pneumo	other_antigens	-0.0393096860945888	-0.0749340036309167	-0.00368536855826081	0.0308973926411072	-297.308371076311	-283.944226904001	0.0756005901553649	0.0179624673950818	p = 0.031	.	0.181310344203306	ns	ns
IgG1	cd4_cells	log10_cb_mot_ratio	Diphteria_toxin	vaccine_antigens	3.14803024587962e-05	2.93184989272117e-06	6.00287550248713e-05	0.0310228687463059	-359.33845318182	-351.493091631297	0.0364910094025029	1.43877677001248e-05	p = 0.031	.	0.220241173522716	ns	ns
IgG4	age_catbetween_20_30	log10_cb	Diphteria_toxin	vaccine_antigens	-0.051575944310495	-0.098463353653672	-0.00468853496731805	0.0312022036307912	-189.455675586056	-174.667301640035	0.00901664456240869	0.0238244417058897	p = 0.031	.	0.218415425415539	ns	ns
IgG1	cd4_cells	log10_cb_mot_ratio	Rotavirus	other_antigens	2.31090626309302e-05	2.09539410875871e-06	4.41227311531018e-05	0.0314630247889595	-429.283209993327	-421.379023028638	0.0355441497642613	1.05930030285673e-05	p = 0.031	.	0.220241173522716	ns	ns
IgG	mat_anemiaabnormal	log10_cb	VSP5	other_antigens	0.0222112999156931	0.00198097769819724	0.042441622133189	0.0315190040718632	-611.872815027336	-600.781534567819	0.0122018483594089	0.0102795792392241	p = 0.032	.	0.178259283143085	ns	ns
IgG4	seasonrainy	log10_cb	RSV	other_antigens	0.0689266917856777	0.00608417824942689	0.131769205321928	0.0316925812093653	-3.25363823646551	7.74564182787179	0.0125506241046537	0.0319278866727679	p = 0.032	.	0.443696136931114	ns	ns
IgG1	treatmentmq_full	log10_cb_mot_ratio	Tetanus_toxin	vaccine_antigens	-0.0189979673471276	-0.0363208393185922	-0.00167509537566304	0.0317862635987266	-580.870855693424	-568.188919713272	0.0272290987962031	0.00877653436734033	p = 0.032	.	0.283048186625633	ns	ns
IgG1	hemoglobin	log10_cb	Tetanus_toxin	vaccine_antigens	0.00654673969833846	0.00057008803464759	0.0125233913620293	0.0319093407585719	-626.637855206926	-615.516524412679	0.0120099862978181	0.0030370250307413	p = 0.032	.	0.148910256873335	ns	ns
IgG2	log10_pf_exposure	log10_cb_mot_ratio	HepB	vaccine_antigens	-0.0741755911862187	-0.14193825672519	-0.00641292564724753	0.032037252892294	-837.365415805249	-826.548009606361	0.0132698993275147	0.0344184495075245	p = 0.032	.	0.360576725593735	ns	ns
IgG1	treatmentmq	log10_cb_mot_ratio	Shiga_toxin	other_antigens	-0.00637946792969871	-0.0122044754816945	-0.000554460377702881	0.0321138987706988	-633.230939944618	-624.944418140225	0.0309599351081171	0.00294072363474017	p = 0.032	.	0.224797291394891	ns	ns
IgG1	prematurityYes	log10_cb	VSP5	other_antigens	-0.0885117041220063	-0.169554106915612	-0.00746930132840107	0.0324140702519613	-223.951887413297	-212.870690996889	0.0120820343987772	0.0411792851878357	p = 0.032	.	0.230295834335227	ns	ns
IgG2	age_catbetween_20_30	log10_cb_mot_ratio	Pertussis_toxin	vaccine_antigens	-0.0152733167533367	-0.0292730220879895	-0.00127361141868384	0.0326064621159107	-887.178281464198	-872.554314220918	0.0118577621375507	0.00711229115040913	p = 0.033	.	0.120481285307949	ns	ns
IgG2	weight_g	log10_cb	Measles	vaccine_antigens	-4.18087476987759e-05	-8.02226469970216e-05	-3.39484840053012e-06	0.0330164596857508	-262.503509356601	-251.462991529549	0.0121402936324069	1.95177745590207e-05	p = 0.033	.	0.115557608900128	ns	ns
IgG2	hivload_cat1000/9999	log10_cb	Measles	vaccine_antigens	-0.0814702734282425	-0.156254344646897	-0.00668620220958824	0.0330348381188469	-124.645965240297	-111.098314233735	0.031658304657208	0.0377243233290574	p = 0.033	.	0.115621933415964	ns	ns
IgG3	malaria_placentariaYes	log10_cb	MSP1_42_3D7	exposure_antigen	0.0598013699534759	0.00476358373783628	0.114839156169116	0.0333056652053848	-431.061075763384	-419.919877346856	0.0116892062090102	0.0279681094523147	p = 0.033	.	0.324625554779954	ns	ns
IgG	hemoglobin	log10_cb	MSP1_42_3D7	exposure_antigen	-0.0078727277159468	-0.0151277707012956	-0.000617684730598028	0.0335355131338426	-505.366809785586	-494.27552932607	0.0118466476198446	0.00368648548698702	p = 0.034	.	0.162379121147952	ns	ns
IgG1	age_catbetween_20_30	log10_cb	Pneumo	other_antigens	-0.0226666110811441	-0.0435557462282343	-0.00177747593405396	0.033542232682707	-678.221672458122	-663.379964388623	0.0142763139432257	0.0106147772836861	p = 0.034	.	0.12427133573808	ns	ns
IgG3	motHIV+	log10_cb_mot_ratio	Pneumo	other_antigens	-0.0181918690472183	-0.0349805118771973	-0.00140322621723934	0.0337898914744324	-711.249546394894	-700.198807092878	0.0119645727503395	0.00853028820792504	p = 0.034	.	0.118264620160513	ns	ns
IgG3	hivload	log10_cb_mot_ratio	Pertussis_toxin	vaccine_antigens	2.81183394513338e-07	2.19260831827348e-08	5.40440705843941e-07	0.0338095676362155	-111.490532343705	-103.472045840319	0.0330644651638855	1.30752125403186e-07	p = 0.034	.	0.217164459793721	ns	ns
IgG4	gest_age	log10_cb	Rotavirus	other_antigens	0.0403585612585015	0.00310469080744515	0.0776124317095578	0.0338292048468723	206.957654528079	218.018580597098	0.0119171566546036	0.0189289133604172	p = 0.034	.	0.0473608867856212	p = 0.047	.
IgG4	haart_2no	log10_cb	Measles	vaccine_antigens	-0.161343457232448	-0.310556916633016	-0.0121299978318803	0.0344082635234065	18.9948676103732	26.3579094991338	0.0408881690092786	0.0750340611727452	p = 0.034	.	0.105277082873551	ns	ns
IgG2	age_catbetween_20_30	log10_cb_mot_ratio	VSP5	other_antigens	-0.0275515103171036	-0.0530682001119956	-0.00203482052221163	0.0344232243736996	-545.024710406295	-530.386781543257	0.00987809211172785	0.0129634779460475	p = 0.034	.	0.120481285307949	ns	ns
IgG2	motHIV+	log10_cb	HiB	vaccine_antigens	-0.0316677082585744	-0.0610117089636286	-0.00232370755352022	0.034510439610569	-382.520876251777	-371.39954545753	0.0115659521269851	0.0149111023459421	p = 0.035	.	0.161048718182655	ns	ns
IgG	hivload_cat400/999	log10_cb_mot_ratio	RSV	other_antigens	-0.0148332443420537	-0.0286085992205594	-0.00105788946354793	0.035095487585269	-488.452432947232	-475.278788006084	0.109548378204968	0.00694246406245652	p = 0.035	.	0.265235973231958	ns	ns
IgG2	mat_anemiaabnormal	log10_cb	Diphteria_toxin	vaccine_antigens	-0.0380192094321566	-0.0733629144287065	-0.00267550443560668	0.035098443589051	-279.593737099285	-268.615290452006	0.0120320002535957	0.0179562562265782	p = 0.035	.	0.198467741189434	ns	ns
IgG1	hivload_cat>9999	log10_cb	Diphteria_toxin	vaccine_antigens	-0.0789832391261202	-0.152382234562829	-0.00558424368941156	0.03518905370156	-169.987351231564	-156.350412138003	0.0281917268607214	0.0370334003038908	p = 0.035	.	0.24632337591092	ns	ns
IgG	treatmentmq_full	log10_cb	Diphteria_toxin	vaccine_antigens	0.0348816894763122	0.00245005070744777	0.0673133282451766	0.0351891201307585	-357.214150029945	-344.600983651954	0.017539896359018	0.0164292625505616	p = 0.035	.	0.225911504213591	ns	ns
IgG	graviditymultigravidae	log10_cb_mot_ratio	Shiga_toxin	other_antigens	-0.00565469608290246	-0.0109170998946297	-0.000392292271175235	0.0352915103552885	-1463.76977428069	-1452.73951287388	0.0117932592044534	0.0026737439849044	p = 0.035	.	0.298034359327149	ns	ns
IgG3	haart_2no	log10_cb_mot_ratio	Tetanus_toxin	vaccine_antigens	-0.0974319725478029	-0.188014602101083	-0.00684934299452232	0.035356471761607	-68.9716485757703	-61.7514908339775	0.0423484675286281	0.0455174586828903	p = 0.035	.	0.270896417234588	ns	ns
IgG1	age_catbetween_20_30	log10_cb	RSV	other_antigens	-0.0186955421066013	-0.0361055280117543	-0.00128555620144827	0.0354080844387845	-790.879936862484	-776.025005640447	0.00973820892110999	0.00884697355790732	p = 0.035	.	0.12427133573808	ns	ns
IgG3	age_catbetween_20_30	log10_cb	MSP1_42_3D7	exposure_antigen	0.0339672953181387	0.00233297340913344	0.0656016172271439	0.0354237030011515	-428.977510519609	-414.122579297572	0.00812132153384215	0.016075142793106	p = 0.035	.	0.24796592100806	ns	ns
IgG1	hivload	log10_cb_mot_ratio	Shiga_toxin	other_antigens	-3.23674789090167e-08	-6.24942914367992e-08	-2.24066638123416e-09	0.0354834986751306	-572.105307560568	-564.086821057182	0.0323003455052073	1.51939582703137e-08	p = 0.035	.	0.248384490725914	ns	ns
IgG1	age_catbetween_20_30	log10_cb	Cp17	other_antigens	-0.0291081336916221	-0.0562292784075186	-0.00198698897572559	0.0355060959251658	-522.258482134891	-507.403550912853	0.00810467274176152	0.0137817486739433	p = 0.036	.	0.12427133573808	ns	ns
IgG1	motHIV+	log10_cb_mot_ratio	HiB	vaccine_antigens	-0.015608386305087	-0.0301635753434472	-0.00105319726672688	0.0356627076856991	-795.189528025888	-784.138788723872	0.0116522067543511	0.00739547315857686	p = 0.036	.	0.0624097384499734	ns	ns
IgG2	weight_g_catlow	log10_cb	Shiga_toxin	other_antigens	0.0546288846790486	0.0036705225663996	0.105587246791698	0.0357174191290022	-396.090919145828	-384.989588425656	0.0114479320714691	0.0258936934458877	p = 0.036	.	0.0625054834757539	ns	ns
IgG3	haartno	log10_cb_mot_ratio	Tetanus_toxin	vaccine_antigens	-0.091071571523787	-0.176002958781689	-0.00614018426588467	0.0358199279554032	-103.925264444861	-95.7431009887244	0.0304279789127943	0.04286072470416	p = 0.036	.	0.359077664410827	ns	ns
IgG	cd4_cells	log10_cb	HiB	vaccine_antigens	-4.87472381531432e-05	-9.42071868218349e-05	-3.28728948445141e-06	0.0358306609561156	-281.207558167066	-273.18907166368	0.0321465238289106	2.29269711956993e-05	p = 0.036	.	0.242751142971785	ns	ns
IgG2	motHIV+	log10_cb_mot_ratio	Measles	vaccine_antigens	-0.0158764975965143	-0.0307062109701953	-0.00104678422283341	0.0359695253535866	-766.489243685621	-755.542320971138	0.0120127715620018	0.0075338466354052	p = 0.036	.	0.0719390507071731	ns	ns
IgG1	mat_anemiaabnormal	log10_cb	OSP	other_antigens	-0.0276932860298468	-0.0535653013931663	-0.00182127066652732	0.0359972806138866	-468.141519274091	-457.020188479844	0.0113275033486604	0.0131468191013163	p = 0.036	.	0.251980964297206	ns	ns
IgG	hemoglobin	log10_cb	VSP5	other_antigens	-0.00650083989056354	-0.0125741858822438	-0.000427493898883307	0.0359993362339496	-611.643559483805	-600.552279024289	0.0114416291204268	0.00308603297058255	p = 0.036	.	0.162379121147952	ns	ns
IgG	treatmentmq	log10_cb_mot_ratio	Shiga_toxin	other_antigens	-0.00926215688074221	-0.0179088805245223	-0.000615433236962129	0.0360058127432951	-533.517536501878	-525.282740116788	0.0298177572385224	0.00436443032694648	p = 0.036	.	0.454731035132327	ns	ns
IgG2	treatmentmq_split	log10_cb	VSP5	other_antigens	-0.0918152724117475	-0.177731435057077	-0.00589910976641767	0.0363609123184776	-16.8632117560466	-4.25004537805553	0.0149744735303504	0.0435235235412159	p = 0.036	.	0.254526386229343	ns	ns
IgG3	mat_anemia_recatabnormal	log10_cb	RSV	other_antigens	0.0796965150731944	0.00501790100566001	0.154375129140729	0.0365522016138475	99.3184466640897	110.439777458336	0.0112411256858898	0.0379478063883198	p = 0.037	.	0.511730822593865	ns	ns
IgG1	haart_2no	log10_cb	Measles	vaccine_antigens	-0.0614560381987768	-0.119012631624888	-0.00389944477266527	0.0366642331464838	-146.34330581817	-138.945581462207	0.0391814271480737	0.0289481076517204	p = 0.037	.	0.426859088441986	ns	ns
IgG	hivload_cat1000/9999	log10_cb_mot_ratio	HepB	vaccine_antigens	-0.0195899939092056	-0.037942168931024	-0.00123781888738711	0.0366776430759191	-416.994033782271	-403.86916971585	0.0222873829898861	0.0092479092968365	p = 0.037	.	0.209938695205048	ns	ns
IgG	prematurityYes	log10_cb	RSV	other_antigens	-0.0218911865193756	-0.0424190485047915	-0.00136332453395965	0.0366910151950461	-1022.40237456015	-1011.37211315334	0.0115668565411505	0.0104298813755303	p = 0.037	.	0.228405306912058	ns	ns
IgG	age	log10_cb_mot_ratio	Shiga_toxin	other_antigens	-0.000379138794535523	-0.000735141309183133	-2.31362798879122e-05	0.0369409342772494	-1463.69121973298	-1452.66095832617	0.0115273736689885	0.000180879236220656	p = 0.037	.	0.517173079881492	ns	ns
IgG	treatmentmq_full	log10_cb	Pneumo	other_antigens	-0.0197883210244748	-0.0383648419045056	-0.00121180014444404	0.0369544463058317	-553.01858436127	-540.336648381117	0.0270420871894258	0.00941168844275774	p = 0.037	.	0.225911504213591	ns	ns
IgG1	hivload_cat1000/9999	log10_cb	RSV	other_antigens	-0.0385570318725774	-0.074795642238724	-0.00231842150643082	0.0372533744290546	-292.516134815069	-278.835142573097	0.0195188574910815	0.0182860254404871	p = 0.037	.	0.129446552071974	ns	ns
IgG4	weight_g_catlow	log10_cb	MSP1_42_3D7	exposure_antigen	-0.051151519292201	-0.0992726136326349	-0.00303042495176712	0.0372951925754332	-440.071523549687	-428.980243090171	0.0112400327195161	0.0244516422938071	p = 0.037	.	0.132880317748288	ns	ns
IgG3	age	log10_cb	Cp17	other_antigens	0.00195727500248067	0.00011309212219355	0.00380145788276779	0.0375879104200528	-506.302214962491	-495.161016545963	0.0110100706693159	0.000937143591565798	p = 0.038	.	0.442719831048602	ns	ns
IgG4	weight_g_catlow	log10_cb	VSP5	other_antigens	-0.121287658534852	-0.235594029507501	-0.00698128756220255	0.0376325810251652	88.1487918185423	99.2800728706669	0.0110399903757987	0.0580853681906807	p = 0.038	.	0.132880317748288	ns	ns
IgG	hivload_cat400/999	log10_cb_mot_ratio	HepB	vaccine_antigens	-0.0201480084377242	-0.0391465837551279	-0.00114943312032054	0.0378908533188511	-416.994033782271	-403.86916971585	0.0222873829898861	0.00957363915152203	p = 0.038	.	0.265235973231958	ns	ns
IgG	mat_anemiaabnormal	log10_cb	OSP	other_antigens	-0.0141358484977229	-0.0274975600736077	-0.000774136921838217	0.0381984178163754	-860.129675370148	-849.038394910631	0.0111037870340939	0.00678945058013843	p = 0.038	.	0.178259283143085	ns	ns
IgG	hivload_cat>9999	log10_cb	OSP	other_antigens	0.0386374572340505	0.00212486285611268	0.0751500516119884	0.038282402171454	-325.151512905319	-311.603861898757	0.0424004081076835	0.018418533431655	p = 0.038	.	0.187715567102222	ns	ns
IgG4	weight_g_catlow	log10_cb	HiB	vaccine_antigens	-0.171804686219438	-0.33442168851971	-0.00918768391916547	0.0384589093216983	299.985988178987	311.107318973234	0.0109544101491734	0.082633543696447	p = 0.038	.	0.132880317748288	ns	ns
IgG4	hemoglobin	log10_cb_mot_ratio	HiB	vaccine_antigens	-0.0266971305041787	-0.0519989261362757	-0.00139533487208166	0.0387089654388105	216.707511202417	227.696392642824	0.0114127217044809	0.0128546879712613	p = 0.039	.	0.26995921954044	ns	ns
IgG	age_cat>30	log10_cb	HepB	vaccine_antigens	0.0299535020287331	0.00156090003479862	0.0583461040226676	0.0387392289256333	-592.452303085255	-577.7179840159	0.00783409995541473	0.0144260388813724	p = 0.039	.	0.0871747061393403	ns	ns
IgG3	hivload_cat400/999	log10_cb_mot_ratio	RSV	other_antigens	-0.0415732647695046	-0.0809764254214505	-0.00217010411755859	0.0388522166149941	-275.733415130491	-262.369270958181	0.0384921159508544	0.0198678329136268	p = 0.039	.	0.181310344203306	ns	ns
IgG	motHIV+	log10_cb	Diphteria_toxin	vaccine_antigens	-0.0216131273619575	-0.0421169070996617	-0.00110934762425323	0.0388989165535336	-591.37788417925	-580.327144877234	0.0111506729537869	0.0104179445763246	p = 0.039	.	0.0680731039686839	ns	ns
IgG1	hivload_cat1000/9999	log10_cb	Rotavirus	other_antigens	-0.0428718517542637	-0.0835795500123831	-0.00216415349614429	0.0391873302334019	-266.001539248293	-252.320547006321	0.0261935701015185	0.0205411299840302	p = 0.039	.	0.129446552071974	ns	ns
IgG4	graviditymultigravidae	log10_cb_mot_ratio	Pneumo	other_antigens	0.0250512925667792	0.00124378526989714	0.0488587998636612	0.0392449719914253	-577.148846398946	-566.201923684462	0.0114920860153757	0.0120947791927201	p = 0.039	.	0.0777868121067401	ns	ns
IgG4	weight_g_catlow	log10_cb	Measles	vaccine_antigens	-0.110612823579892	-0.215746239499429	-0.00547940766035436	0.0392647387851332	36.7835351119145	47.8748155714307	0.0109471977149459	0.0534211599803654	p = 0.039	.	0.132880317748288	ns	ns
IgG4	hemoglobin	log10_cb_mot_ratio	Shiga_toxin	other_antigens	-0.0172054810835692	-0.0335599305817926	-0.000851031585345718	0.0392813290225307	-32.1067320652776	-21.0764706584728	0.0111705958669911	0.00830943662568258	p = 0.039	.	0.26995921954044	ns	ns
IgG	age_cat>30	log10_cb	Shiga_toxin	other_antigens	0.0189645751757757	0.000933072076443435	0.0369960782751079	0.0393332889895301	-876.690556425887	-861.862115366892	0.0122900206640998	0.00916255163150445	p = 0.039	.	0.0871747061393403	ns	ns
IgG3	graviditymultigravidae	log10_cb_mot_ratio	OSP	other_antigens	0.079548248083262	0.00380950327974967	0.155286992886774	0.0396044848158102	94.8565460327601	105.907285334776	0.011047109252544	0.0384827605318264	p = 0.04	.	0.110892557484269	ns	ns
IgG3	treatmentmq	log10_cb_mot_ratio	Measles	vaccine_antigens	0.0181280073686271	0.000848224641251869	0.0354077900960022	0.0399309018310444	-378.784746814443	-370.49822501005	0.0278101087552193	0.00872360507964601	p = 0.04	.	0.310958780266519	ns	ns
IgG	mat_anemia_recatabnormal	log10_cb_mot_ratio	RSV	other_antigens	-0.00506806238509239	-0.00990758435082457	-0.000228540419360198	0.0401842426213385	-1475.99956281455	-1465.04209527374	0.0113111140420901	0.00245862955157272	p = 0.04	.	0.0958810913830192	ns	ns
IgG	hivload_cat>9999	log10_cb	HiB	vaccine_antigens	0.0440693283865873	0.00195951998164887	0.0861791367915258	0.0404198693604979	-290.271492683359	-276.723841676798	0.0405122392703421	0.0212420105205011	p = 0.04	.	0.187715567102222	ns	ns
IgG1	treatmentmq_full	log10_cb_mot_ratio	Shiga_toxin	other_antigens	-0.00666650285207951	-0.0130391558706868	-0.000293849833472228	0.0404354552322333	-932.875022770316	-920.193086790164	0.024428472726133	0.00322866833635169	p = 0.04	.	0.283048186625633	ns	ns
IgG2	hivload_cat1000/9999	log10_cb_mot_ratio	VSP5	other_antigens	-0.0651974914525592	-0.127548863061625	-0.00284611984349375	0.0405946759469362	-167.776845457022	-154.459649986461	0.0905031830690655	0.0314350999025031	p = 0.041	.	0.284162731628553	ns	ns
IgG4	age	log10_cb_mot_ratio	HepB	vaccine_antigens	0.00217002719276253	9.29479769243113e-05	0.00424710640860076	0.0406535224173063	-432.009675030344	-421.010394966006	0.0110859504761381	0.00105528480771842	p = 0.041	.	0.217953258417606	ns	ns
IgG2	weight_g	log10_cb_mot_ratio	RSV	other_antigens	-1.33983928670157e-05	-2.62367886899422e-05	-5.59997044089207e-07	0.0408709431428774	-869.452745466234	-858.505822751751	0.011250201686023	6.52221002101183e-06	p = 0.041	.	0.384889406927497	ns	ns
IgG	mat_anemia_recatabnormal	log10_cb_mot_ratio	Diphteria_toxin	vaccine_antigens	-0.0080491633460787	-0.0157703838281537	-0.000327942864003701	0.0410918963070082	-1196.66471075463	-1185.74964674663	0.0113383966562022	0.00392238161979115	p = 0.041	.	0.0958810913830192	ns	ns
IgG3	log10_mother	log10_cb_mot_ratio	RSV	other_antigens	-0.0345841410799921	-0.0677610802504887	-0.00140720190949546	0.0411003794856084	-637.832263625045	-626.781524323029	0.0108337674937591	0.0168571608704292	p = 0.041	.	0.0442619471383475	p = 0.044	.
IgG	haart_2no	log10_cb	RSV	other_antigens	-0.0223017966438284	-0.0437296760088739	-0.000873917278782763	0.0415540015134579	-311.337964208857	-304.010010439386	0.037637779520859	0.0107734100903531	p = 0.042	.	0.287889485143146	ns	ns
IgG2	treatmentmq_full	log10_cb	Rotavirus	other_antigens	-0.04724089265337	-0.0926720093605505	-0.00180977594618953	0.0416378976275125	-238.910885180811	-226.251741285117	0.0144801732291685	0.0230164737812231	p = 0.042	.	0.492283096192076	ns	ns
IgG3	gest_age	log10_cb_mot_ratio	VSP5	other_antigens	0.0156168761824004	0.000575322981069552	0.0306584293837313	0.0419116914793587	-330.305749550615	-319.337774118156	0.0110226293035344	0.00764169822838017	p = 0.042	.	0.146690920177756	ns	ns
IgG1	hivload_cat>9999	log10_cb_mot_ratio	Diphteria_toxin	vaccine_antigens	-0.0266059754422671	-0.0522362684246398	-0.000975682459894472	0.0420435059360766	-387.906709542646	-374.636907791859	0.0326979278449055	0.0129202462149281	p = 0.042	.	0.215710292374481	ns	ns
IgG2	hivload_cat>9999	log10_cb_mot_ratio	Measles	vaccine_antigens	-0.0353754662694725	-0.0694865897782887	-0.0012643427606564	0.0422395818012389	-324.725449638226	-311.503495142519	0.0343826982631363	0.0171933534278764	p = 0.042	.	0.509792283999371	ns	ns
IgG4	prematurityYes	log10_cb	Measles	vaccine_antigens	-0.134535460940032	-0.264327682857742	-0.00474323902232257	0.0422453541790499	38.3051301796188	49.3558694816349	0.0106758817599202	0.0659472639520331	p = 0.042	.	0.114488649153606	ns	ns
IgG2	mat_anemiaabnormal	log10_cb	Measles	vaccine_antigens	-0.037925572148351	-0.0745645925508942	-0.00128655174580781	0.0425288016834502	-260.425153351015	-249.39489194421	0.0107106597640494	0.0186157056582733	p = 0.043	.	0.198467741189434	ns	ns
IgG	graviditymultigravidae	log10_cb_mot_ratio	VSP5	other_antigens	-0.0108781974018095	-0.0213897784440278	-0.000366616359591123	0.0425763370467355	-1052.54528556241	-1041.54600549807	0.0108158035234235	0.00534053381034743	p = 0.043	.	0.298034359327149	ns	ns
IgG	cd4_cells_cat<350	log10_cb	OSP	other_antigens	0.0237903565477862	0.000810525685512445	0.0467701874100599	0.042583240477253	-306.753889959552	-298.735403456166	0.0294265840307191	0.0115894965940478	p = 0.043	.	0.223499569131271	ns	ns
IgG	haartno	log10_cb	Rotavirus	other_antigens	-0.0334632118448238	-0.0657985683881821	-0.00112785530146541	0.0426485350747373	-333.060104765131	-324.773582960738	0.0268626329368412	0.0163243302907348	p = 0.043	.	0.449298694088973	ns	ns
IgG1	treatmentmq	log10_cb	HepB	vaccine_antigens	-0.0776237204638047	-0.152655944155723	-0.00259149677188622	0.042711734413781	-32.3536826518132	-23.9663110150229	0.0259448443462761	0.0378931510395207	p = 0.043	.	0.439151104627684	ns	ns
IgG	prematurityYes	log10_cb_mot_ratio	Tetanus_toxin	vaccine_antigens	-0.0161420272448603	-0.0317584931208182	-0.000525561368902444	0.0428208668246929	-1162.27163995096	-1151.33529925803	0.0110119883825707	0.00793341391181456	p = 0.043	.	0.11989842710914	ns	ns
IgG	age_catbetween_20_30	log10_cb_mot_ratio	Pneumo	other_antigens	-0.00752331014866924	-0.0148035220703439	-0.00024309822699462	0.042872639939943	-1270.03246439044	-1255.3806224699	0.00747275280987825	0.00369868837073362	p = 0.043	.	0.141181407719334	ns	ns
IgG4	age_catbetween_20_30	log10_cb_mot_ratio	HiB	vaccine_antigens	0.0987283485242969	0.00314729545067895	0.194309401597915	0.0429650247304063	218.285449664503	232.964973356426	0.00805887824152274	0.0485610911924761	p = 0.043	.	0.0859300494608126	ns	ns
IgG1	age	log10_cb	Diphteria_toxin	vaccine_antigens	0.00203990930965732	6.12877288888843e-05	0.00401853089042575	0.0433559980513893	-464.884686820023	-453.783356099851	0.0103501585116235	0.00100540556120264	p = 0.043	.	0.12139679454389	ns	ns
IgG1	mat_anemiaabnormal	log10_cb_mot_ratio	Cp17	other_antigens	-0.0109623377244458	-0.0215981375385676	-0.000326537910324063	0.0434123087149611	-982.201900858744	-971.18193105723	0.0106284276519054	0.00540380298644606	p = 0.043	.	0.202590774003152	ns	ns
IgG4	haartno	log10_cb	Pertussis_toxin	vaccine_antigens	-0.107588408324377	-0.211988568664016	-0.00318824798473787	0.0435071810264785	-52.7913658358869	-44.4288906075408	0.0259047877304052	0.0527201047118491	p = 0.044	.	0.0955588484828663	ns	ns
IgG4	motHIV+	log10_cb_mot_ratio	Shiga_toxin	other_antigens	0.0547285267059316	0.00160554400665351	0.10785150940521	0.0435086174931213	-33.9282197956652	-22.8774804936491	0.0105067933155456	0.026991720383751	p = 0.044	.	0.156134153431129	ns	ns
IgG	age_cat>30	log10_cb	OSP	other_antigens	0.0190755135459034	0.000552555930372914	0.0375984711614339	0.0435873530696701	-857.635381244367	-842.820251345742	0.00703845097958611	0.00941215075059608	p = 0.044	.	0.0871747061393403	ns	ns
IgG3	motHIV+	log10_cb_mot_ratio	MSP1_42_3D7	exposure_antigen	-0.0110282360285432	-0.0217445638854593	-0.000311908171627103	0.0437351839299939	-975.222791009288	-964.172051707272	0.0104770109620993	0.00544495264303772	p = 0.044	.	0.122458515003983	ns	ns
IgG	hivload_cat1000/9999	log10_cb	RSV	other_antigens	-0.0261088216119153	-0.0514830624841037	-0.000734580739726817	0.0438364568457989	-369.10902326953	-355.561372262968	0.0250906876944007	0.012799865683871	p = 0.044	.	0.153427598960296	ns	ns
IgG3	hivload_cat400/999	log10_cb	MSP1_42_3D7	exposure_antigen	-0.0720620793436175	-0.142114504221103	-0.00200965446613235	0.0438862247874153	-151.578041516553	-137.89704927458	0.0226716346112726	0.0353484973771006	p = 0.044	.	0.36659186563291	ns	ns
IgG3	treatmentmq	log10_cb_mot_ratio	Rotavirus	other_antigens	-0.0229556244301378	-0.0453291370911166	-0.000582111769159115	0.0444226828952169	-318.333046636852	-310.046524832459	0.0262772685343142	0.0112951471542308	p = 0.044	.	0.310958780266519	ns	ns
IgG2	cd4_cells_cat<350	log10_cb	Pertussis_toxin	vaccine_antigens	-0.0526197293975424	-0.103943847172854	-0.00129561162223034	0.0445864246553195	-137.10398737843	-129.002546281053	0.0279129984511054	0.0258928485359746	p = 0.045	.	0.208069981724824	ns	ns
IgG4	haartno	log10_cb	HiB	vaccine_antigens	-0.216018874750984	-0.42673927011748	-0.00529847938448727	0.0445986135891188	115.760850881773	124.123326110119	0.0255579407653891	0.10640981079438	p = 0.045	.	0.0955588484828663	ns	ns
IgG1	prematurityYes	log10_cb_mot_ratio	MSP1_42_3D7	exposure_antigen	0.0217704045774138	0.000524223511918217	0.0430165856429094	0.0446446979060484	-1001.7747530505	-990.796306403221	0.0106128701315623	0.0107940543043112	p = 0.045	.	0.625025770684678	ns	ns
IgG3	weight_g	log10_cb	HiB	vaccine_antigens	8.17046814456811e-05	1.84973740373097e-06	0.000161559625487631	0.0449561891605391	193.300549786842	204.431830838967	0.0100446908820642	4.05786990441042e-05	p = 0.045	.	0.314693324123774	ns	ns
IgG3	age_cat>30	log10_cb_mot_ratio	Rotavirus	other_antigens	-0.0171118216917662	-0.0338388340332113	-0.000384809350321046	0.0449901512355204	-912.64019577485	-897.905876705495	0.00707080747138844	0.00849885228759353	p = 0.045	.	0.599614569451604	ns	ns
IgG	hivload_cat1000/9999	log10_cb_mot_ratio	Cp17	other_antigens	-0.0191253787319027	-0.037819363525377	-0.000431393938428344	0.0450376224512486	-420.669765182414	-407.447810686708	0.0126315243303065	0.00942250663325358	p = 0.045	.	0.209938695205048	ns	ns
IgG1	age_catbetween_20_30	log10_cb_mot_ratio	MSP1_42_3D7	exposure_antigen	-0.0119630529622528	-0.0236715155218542	-0.000254590402651451	0.0452534295725482	-1006.82846497009	-992.107774534023	0.00710409805327428	0.00594888428581795	p = 0.045	.	0.126709602803135	ns	ns
IgG4	graviditymultigravidae	log10_cb_mot_ratio	MSP1_42_3D7	exposure_antigen	-0.00699394009495395	-0.0138439475988286	-0.000143932591079296	0.0454074348056334	-1287.51026936315	-1276.54229393069	0.0105504459910396	0.00348007213790384	p = 0.045	.	0.0777868121067401	ns	ns
IgG3	log10_pf_exposure	log10_cb_mot_ratio	Rotavirus	other_antigens	-0.066074491348932	-0.13079164139557	-0.00135734130229363	0.0454146892777532	-914.577779358613	-903.527040056597	0.0102611499287139	0.0328827021626528	p = 0.045	.	0.211935216629515	ns	ns
IgG1	hivload_cat1000/9999	log10_cb	Diphteria_toxin	vaccine_antigens	-0.0628850642684727	-0.124494130245489	-0.00127599829145601	0.0455190614382938	-169.987351231564	-156.350412138003	0.0281917268607214	0.0310848014894574	p = 0.046	.	0.129446552071974	ns	ns
IgG3	haart_2no	log10_cb_mot_ratio	HepB	vaccine_antigens	-0.0364278244375571	-0.0721211930431558	-0.000734455831958442	0.0455778212744155	-216.676515837784	-209.530435933762	0.0380899511398053	0.0179287345395664	p = 0.046	.	0.270896417234588	ns	ns
IgG4	motHIV+	log10_cb_mot_ratio	VSP5	other_antigens	0.0583726922981559	0.00115203822510892	0.115593346371203	0.0455913753549685	9.06402267368929	20.1045405007405	0.0102740324897684	0.0290733262365907	p = 0.046	.	0.156134153431129	ns	ns
IgG1	hivload_cat>9999	log10_cb_mot_ratio	Pertussis_toxin	vaccine_antigens	-0.020316255911437	-0.0402858227134004	-0.000346689109473629	0.0462236340802459	-445.841674278347	-432.477530106038	0.0363532543334379	0.0100690404022024	p = 0.046	.	0.215710292374481	ns	ns
IgG1	hivload_cat1000/9999	log10_cb	Pneumo	other_antigens	-0.0430837111969404	-0.0854344160862545	-0.000733006307626245	0.0462309114542764	-254.697568299365	-241.060629205803	0.0143315276390293	0.0213680118915295	p = 0.046	.	0.129446552071974	ns	ns
IgG3	malaria_placentariaYes	log10_cb	VSP5	other_antigens	0.0863490267477538	0.00139608595492978	0.171301967540578	0.0463750792542792	-168.010114398467	-156.868915981938	0.00983886938948697	0.0431698531092907	p = 0.046	.	0.324625554779954	ns	ns
IgG	hemoglobin	log10_cb	Pneumo	other_antigens	0.00380350952592575	6.117903113644e-05	0.00754584002071505	0.0463940346137005	-891.596909998908	-880.535983929888	0.0101045771004663	0.00190150040369578	p = 0.046	.	0.162379121147952	ns	ns
IgG2	motHIV+	log10_cb	Diphteria_toxin	vaccine_antigens	-0.03525641707175	-0.0699737146422762	-0.000539119501223685	0.0465697700768138	-280.421544885773	-269.422264821435	0.0102933521976715	0.0176385360807873	p = 0.047	.	0.162994195268848	ns	ns
IgG3	hivload	log10_cb_mot_ratio	VSP5	other_antigens	2.88130226331119e-07	4.22018712812666e-09	5.72040265534112e-07	0.046750029472422	-92.0515478699561	-84.0330613665704	0.0279626401755513	1.43185319860684e-07	p = 0.047	.	0.217164459793721	ns	ns
IgG	age_catbetween_20_30	log10_cb_mot_ratio	VSP5	other_antigens	-0.0107842294413201	-0.0214166747733402	-0.000151784109300017	0.0468390984176289	-1050.87682676492	-1036.21112001247	0.00849522587449714	0.00540186036999002	p = 0.047	.	0.141181407719334	ns	ns
IgG	motHIV+	log10_cb	MSP1_42_3D7	exposure_antigen	-0.0240444947087299	-0.0477950827214742	-0.000293906695985561	0.0472492381051386	-509.564305578524	-498.452958154555	0.00983310815479577	0.0120686549394443	p = 0.047	.	0.0734988148302156	ns	ns
IgG3	hivload	log10_cb_mot_ratio	Shiga_toxin	other_antigens	2.29614711055401e-07	2.839083006799e-09	4.56390339104003e-07	0.0472504755894666	-140.136560057882	-132.118073554496	0.0277959883264955	1.14370527121551e-07	p = 0.047	.	0.217164459793721	ns	ns
IgG4	weight_g_catlow	log10_cb	OSP	other_antigens	-0.160277992402004	-0.318746599834408	-0.00180938496960084	0.0474572563386745	283.399079637177	294.510427061145	0.00980851794248339	0.0805244459972824	p = 0.047	.	0.132880317748288	ns	ns
IgG4	prematurityYes	log10_cb	HepB	vaccine_antigens	-0.0601056476656242	-0.119580156201818	-0.00063113912943083	0.0476334090655695	-403.798298236273	-392.747558934257	0.00998846865874758	0.0302189226357532	p = 0.048	.	0.114488649153606	ns	ns
IgG3	seasonrainy	log10_cb_mot_ratio	Pneumo	other_antigens	0.0189493897567765	0.000195225917128592	0.0377035535964244	0.0476780279551232	-691.255936512339	-680.287961079879	0.0102637154502951	0.00952784986164251	p = 0.048	.	0.518458954585983	ns	ns
IgG4	haartno	log10_cb	OSP	other_antigens	-0.206324341039163	-0.410596896577286	-0.00205178550104054	0.0477794242414332	107.268894853046	115.606265332381	0.0248043473994743	0.103144640471135	p = 0.048	.	0.0955588484828663	ns	ns
IgG	age_catbetween_20_30	log10_cb_mot_ratio	Shiga_toxin	other_antigens	-0.0053840079952625	-0.0107181747509675	-4.98412395574695e-05	0.0479112908748929	-1463.21411269627	-1448.50709748719	0.0132666921526928	0.00271016630140103	p = 0.048	.	0.141181407719334	ns	ns
IgG3	graviditymultigravidae	log10_cb	OSP	other_antigens	0.0834238399856878	0.000595976034764398	0.166251703936611	0.0483844799403934	163.383409721278	174.524608137806	0.0096037839611719	0.0420899698909507	p = 0.048	.	0.227103548797473	ns	ns
IgG	treatmentmq_full	log10_cb	Shiga_toxin	other_antigens	-0.0209921797058116	-0.041836057643037	-0.000148301768586202	0.0484096080457695	-518.332853670172	-505.605719469003	0.0204667244036382	0.0105612820850273	p = 0.048	.	0.225911504213591	ns	ns
IgG3	gest_age	log10_cb	Shiga_toxin	other_antigens	0.0160066179083002	0.000106255158089645	0.0319069806585107	0.0484983985415812	-295.376558690587	-284.315632621568	0.00985208348920685	0.00807906897333952	p = 0.048	.	0.161055432361677	ns	ns
IgG3	haartno	log10_cb	Pertussis_toxin	vaccine_antigens	-0.0770814366442309	-0.153793356817471	-0.000369516470990733	0.0489242314781691	-126.753150320714	-118.390675092368	0.0242650378154539	0.0387380675568243	p = 0.049	.	0.281536488584644	ns	ns
IgG	prematurityYes	log10_cb	HepB	vaccine_antigens	-0.0427132530372437	-0.0852274424724424	-0.00019906360204508	0.0489439943382981	-589.263829307501	-578.274947867093	0.0100394530868263	0.0215995199505639	p = 0.049	.	0.228405306912058	ns	ns
IgG2	haartno	log10_cb_mot_ratio	MSP1_42_3D7	exposure_antigen	0.0386359219079484	0.00012772154258589	0.077144122273311	0.0492581402216905	-277.939702699259	-269.811112095322	0.0261547902493983	0.019429279523895	p = 0.049	.	0.344806981551834	ns	ns
IgG4	hivload	log10_cb_mot_ratio	Tetanus_toxin	vaccine_antigens	2.77283786746452e-07	6.9186064604337e-10	5.53875712846861e-07	0.0494401143906062	-96.9232221164775	-88.9329048341413	0.0273467073337071	1.39478916766066e-07	p = 0.049	.	0.323248469242502	ns	ns
IgG4	motHIV+	log10_cb	RSV	other_antigens	-0.0550575089825001	-0.110004889161644	-0.000110128803355966	0.0495455544780613	-9.0394025919479	2.0417938244602	0.00966485224674585	0.027919876024455	p = 0.05	.	0.223956568563815	ns	ns
IgG	log10_pf_exposure	log10_cb	Pertussis_toxin	vaccine_antigens	0.0986057440013296	0.000167037552294413	0.197044450450365	0.0496150951763331	-673.40118477803	-662.401904713693	0.00992557288546536	0.050012955988873	p = 0.05	.	0.347305666234332	ns	ns
IgG1	log10_pf_exposure	log10_cb	Measles	vaccine_antigens	0.130883214959822	0.000213784337520201	0.261552645582123	0.0496288004613681	-501.422832782737	-490.372093480721	0.00975438195339051	0.0663929725864025	p = 0.05	.	0.138960641291831	ns	ns
IgG4	graviditymultigravidae	log10_cb_mot_ratio	HiB	vaccine_antigens	0.0938644837404303	-2.39537151580649e-06	0.187731362852376	0.0500058077829043	216.771236337163	227.780879106104	0.00984587330800557	0.0476908859115417	ns	ns	0.0777868121067401	ns	ns
IgG3	prematurityYes	log10_cb_mot_ratio	Pneumo	other_antigens	-0.0361969279530356	-0.0724374275577687	4.35716516975077e-05	0.0502742329333417	-697.627464091995	-686.638582651588	0.00988346111809413	0.0184121443835586	ns	ns	0.564643240053079	ns	ns
IgG4	age_cat>30	log10_cb_mot_ratio	Cp17	other_antigens	0.0629898916276951	-0.000101962315930251	0.12608174557132	0.0503689016324095	-135.000456217781	-120.348614297238	0.00941439771750929	0.0320536145073691	ns	ns	0.196208218672522	ns	ns
IgG	age_catbetween_20_30	log10_cb_mot_ratio	RSV	other_antigens	-0.00497592522899068	-0.00996106114603362	9.21068805225661e-06	0.0504219313283337	-1485.35937922657	-1470.72145036353	0.00798915131085665	0.00253264432174004	ns	ns	0.141181407719334	ns	ns
IgG1	hivload_cat400/999	log10_cb_mot_ratio	Diphteria_toxin	vaccine_antigens	-0.0225914101183816	-0.0452425020902607	5.96818534973655e-05	0.050595252380382	-387.906709542646	-374.636907791859	0.0326979278449055	0.0114184291812401	ns	ns	0.602002076707308	ns	ns
IgG1	age_cat>30	log10_cb	Pertussis_toxin	vaccine_antigens	-0.0296588059383598	-0.0593987431542675	8.11312775478787e-05	0.0506242595239799	-579.307811880718	-564.45288065868	0.0545292464638071	0.0151125015032369	ns	ns	0.167868919564105	ns	ns
IgG	log10_mother	log10_cb_mot_ratio	RSV	other_antigens	-0.0560547244420205	-0.112353767774405	0.000244318890363492	0.0509957920213407	-1486.88510513244	-1475.90665848516	0.00983497191466731	0.0286025488127574	ns	ns	0.0594950906915641	ns	ns
IgG4	age_cat>30	log10_cb_mot_ratio	Pneumo	other_antigens	0.0290148149130834	-0.000175475885696712	0.0582051057118635	0.0513837008154487	-576.642320354197	-562.046423401553	0.0131773482670545	0.0148291336178359	ns	ns	0.196208218672522	ns	ns
IgG1	log10_pf_exposure	log10_cb_mot_ratio	Pneumo	other_antigens	-0.0582487263923304	-0.116871471800691	0.000374019016030382	0.0514698742235164	-964.997258441837	-953.977288640323	0.00964592346143445	0.0297848560754925	ns	ns	0.364970029893065	ns	ns
IgG2	log10_pf_exposure	log10_cb_mot_ratio	HiB	vaccine_antigens	-0.0435314433437795	-0.0873501655775197	0.00028727888996069	0.051510960799105	-1136.25771071992	-1125.22744931311	0.00960815500690515	0.0222635983839875	ns	ns	0.360576725593735	ns	ns
IgG1	malaria_placentariaYes	log10_cb_mot_ratio	Rotavirus	other_antigens	-0.0204019013973715	-0.040986848095456	0.000183045300713034	0.0520586542212543	-1011.91780029778	-1000.86706099576	0.00948233148440691	0.010459185406332	ns	ns	0.228402592457342	ns	ns
IgG4	log10_pf_exposure	log10_cb	Pneumo	other_antigens	-0.282707799731098	-0.56795658061035	0.00254098114815388	0.0520620782930866	-50.8758966280959	-39.8870151876881	0.00968050695011125	0.144921891145698	ns	ns	0.364434548051606	ns	ns
IgG	mat_anemia_recatabnormal	log10_cb	OSP	other_antigens	-0.0148430972226202	-0.029835716547087	0.000149522101846598	0.0523138828805931	-859.594727745885	-848.503447286369	0.00932699917569701	0.00761815934973554	ns	ns	0.198383468852728	ns	ns
IgG3	hivload_cat400/999	log10_cb	Tetanus_toxin	vaccine_antigens	-0.127075336168281	-0.25547608447056	0.00132541213399756	0.0523702665189871	-13.4300301458133	0.250962096159217	0.013552674599547	0.0647910978459164	ns	ns	0.36659186563291	ns	ns
IgG2	age	log10_cb_mot_ratio	HepB	vaccine_antigens	-0.000961474409339719	-0.00193287961930708	9.93080062764362e-06	0.0523715534899477	-836.525054749951	-825.707648551063	0.0102166205909262	0.000493402390603709	ns	ns	0.369757646325752	ns	ns
IgG3	cd4_cells	log10_cb_mot_ratio	Rotavirus	other_antigens	4.40299142442759e-05	-4.9900801555111e-07	8.8558836504103e-05	0.052573556025365	-274.584253447065	-266.680066482376	0.0271583477798591	2.24470566792989e-05	ns	ns	0.73602978435511	ns	ns
IgG2	cd4_cells_cat<350	log10_cb_mot_ratio	Diphteria_toxin	vaccine_antigens	0.0253130460162676	-0.000294897474079861	0.0509209895066151	0.0526451712054564	-274.919675276741	-267.074313726217	0.027681522625583	0.0129058183228772	ns	ns	0.73703239687639	ns	ns
IgG2	haart_2no	log10_cb_mot_ratio	MSP1_42_3D7	exposure_antigen	0.0418141919681413	-0.000511975000939642	0.0841403589372222	0.0527677763140411	-191.578820682715	-184.395473218697	0.0345932516985892	0.0212646198088961	ns	ns	0.369374434198288	ns	ns
IgG2	log10_pf_exposure	log10_cb	Measles	vaccine_antigens	0.196645278509892	-0.00243014333278127	0.395720700352566	0.052843600060708	-255.795848750105	-244.827873317646	0.00966152173774548	0.101138112404149	ns	ns	0.273469338276262	ns	ns
IgG1	log10_pf_exposure	log10_cb_mot_ratio	Rotavirus	other_antigens	-0.0541592094166549	-0.109005195661846	0.000686776828536455	0.0529192284504585	-1011.89015033077	-1000.83941102876	0.00938917138655992	0.0278671763082568	ns	ns	0.364970029893065	ns	ns
IgG	cd4_cells	log10_cb	OSP	other_antigens	-3.94452316066402e-05	-7.94154207064938e-05	5.24957493213355e-07	0.0530295222866755	-306.376198550678	-298.357712047293	0.0259945748738278	2.01583020002422e-05	ns	ns	0.242751142971785	ns	ns
IgG1	treatmentmq_full	log10_cb	Pneumo	other_antigens	-0.0281701480202918	-0.056715046234803	0.00037475019421946	0.0530506628551616	-406.400066102976	-393.672931901807	0.0410947610193317	0.0144632742064491	ns	ns	0.371052996337623	ns	ns
IgG2	mat_anemiaabnormal	log10_cb_mot_ratio	HepB	vaccine_antigens	-0.0127894976747287	-0.0257485770029962	0.000169581653538683	0.0530522096440199	-828.677494467381	-817.882228590386	0.0102128450389856	0.00658203787839741	ns	ns	0.371365467508139	ns	ns
IgG2	weight_g_catlow	log10_cb_mot_ratio	Pertussis_toxin	vaccine_antigens	0.020718582218738	-0.000279059649146575	0.0417162240866225	0.0531022162281755	-884.115110180014	-873.157642639208	0.00966699762964585	0.010667463269156	ns	ns	0.185857756798614	ns	ns
IgG	hivload_cat>9999	log10_cb	Pertussis_toxin	vaccine_antigens	0.043591502285919	-0.000693883140319582	0.0878768877121575	0.0536330191720634	-282.306074562002	-268.75842355544	0.0375809677113287	0.0223394657625249	ns	ns	0.187715567102222	ns	ns
IgG4	haart_2no	log10_cb	HiB	vaccine_antigens	-0.214746037847586	-0.432998132679273	0.00350605698410145	0.053710193703906	85.5781788380472	92.9759031940109	0.0318282927982461	0.109769963097484	ns	ns	0.105277082873551	ns	ns
IgG3	cd4_cells_cat<350	log10_cb	Pneumo	other_antigens	-0.0466863391551176	-0.0941483380003855	0.00077565969015022	0.0537948971611384	-154.314896969341	-146.213455871964	0.0250590186826729	0.0239444222440441	ns	ns	0.376564280127969	ns	ns
IgG1	age_catbetween_20_30	log10_cb	Tetanus_toxin	vaccine_antigens	-0.0221946234255249	-0.04475649668296	0.000367249831910249	0.0538228527530829	-633.794123713545	-618.939192491508	0.0210997183932524	0.0114649315176244	ns	ns	0.150703987708632	ns	ns
IgG	treatmentmq_split	log10_cb	VSP5	other_antigens	-0.0269010057386403	-0.0542632605803411	0.000461249103060505	0.0539451783180348	-420.272297465344	-407.545163264176	0.00990625078789942	0.0138640464473989	ns	ns	0.321321276986509	ns	ns
IgG3	prematurityYes	log10_cb	OSP	other_antigens	-0.147543262484778	-0.297689280098683	0.00260275512912683	0.0540789983115174	142.329755441572	153.41095185798	0.00917204184871223	0.0762922305609215	ns	ns	0.425766769220579	ns	ns
IgG2	motHIV+	log10_cb_mot_ratio	OSP	other_antigens	0.0224438985515467	-0.000406500510977438	0.0452942976140709	0.0541890039220394	-526.238956160265	-515.229313391323	0.00938290338348657	0.0116095878017249	ns	ns	0.0948307568635689	ns	ns
IgG1	malaria_placentariaYes	log10_cb_mot_ratio	Pertussis_toxin	vaccine_antigens	-0.0152795554583129	-0.0308367773657383	0.000277666449112476	0.0542036198878138	-1176.57844127653	-1165.52770197452	0.00925305805230836	0.00790460479318865	ns	ns	0.228402592457342	ns	ns
IgG	cd4_cells_cat<350	log10_cb	Pneumo	other_antigens	-0.0216635980859467	-0.0437401978384485	0.000413001666555123	0.0543615081251395	-315.335011619461	-307.316525116076	0.0256084071146712	0.0111339669631694	ns	ns	0.223499569131271	ns	ns
IgG	weight_g_catlow	log10_cb	Tetanus_toxin	vaccine_antigens	-0.0269768415277158	-0.054480924208477	0.000527241153045286	0.0545266161480101	-759.918433261802	-748.837236845394	0.00912576167455337	0.013975381102968	ns	ns	0.763372626072142	ns	ns
IgG1	cd4_cells_cat<350	log10_cb	OSP	other_antigens	0.044217660612759	-0.00093380219487927	0.0893691234203972	0.0548424236397852	-165.294368408932	-157.192927311555	0.0247671229664181	0.0227787644158635	ns	ns	0.415688532937232	ns	ns
IgG1	seasonrainy	log10_cb_mot_ratio	Tetanus_toxin	vaccine_antigens	0.0112705216177448	-0.000237320887737017	0.0227783641232266	0.0548820555619619	-970.613322974481	-959.645347542022	0.00944075132499633	0.00584643477369329	ns	ns	0.493725337522485	ns	ns
IgG2	weight_g	log10_cb_mot_ratio	Pneumo	other_antigens	-1.78970401696628e-05	-3.61787509597585e-05	3.84670620432973e-07	0.0549842009896424	-656.560428551559	-645.677565210487	0.0097027740743465	9.28667313781499e-06	ns	ns	0.384889406927497	ns	ns
IgG	malaria_placentariaYes	log10_cb	Pertussis_toxin	vaccine_antigens	0.0342834479862248	-0.000739752820115985	0.0693066487925657	0.055006418412915	-693.65492069366	-682.563640234143	0.00904598182532224	0.0177962448659704	ns	ns	0.416083665288429	ns	ns
IgG	mat_anemiaabnormal	log10_cb_mot_ratio	Cp17	other_antigens	-0.00669548538939982	-0.0135375533696211	0.000146582590821504	0.0550796405264246	-1225.3321696944	-1214.35372304712	0.00938681657434515	0.00347609074330247	ns	ns	0.154222993473989	ns	ns
IgG4	motHIV+	log10_cb_mot_ratio	MSP1_42_3D7	exposure_antigen	-0.00588220592643402	-0.0119101384493546	0.000145726596486565	0.0557621976539748	-1287.16293908345	-1276.19496365099	0.00934808740416249	0.00306242584556505	ns	ns	0.156134153431129	ns	ns
IgG4	haart_2no	log10_cb	MSP1_42_3D7	exposure_antigen	-0.0652850293344176	-0.132221032028833	0.00165097335999814	0.0557878407337216	-117.700461934543	-110.372508165072	0.0318478320152806	0.033653773877982	ns	ns	0.105277082873551	ns	ns
IgG1	prematurityYes	log10_cb	Shiga_toxin	other_antigens	-0.0232877083091678	-0.0471937014951986	0.000618284876863065	0.0561860713547701	-949.132819822234	-938.051623405825	0.00895761577337617	0.0121471190040246	ns	ns	0.230295834335227	ns	ns
IgG4	haartno	log10_cb_mot_ratio	Cp17	other_antigens	-0.105417420512996	-0.213811600395891	0.00297675936989986	0.0565140430479942	-47.8886265533545	-39.7871854559773	0.0243131764764281	0.0546845070805882	ns	ns	0.443832254452778	ns	ns
IgG	mat_anemia_recatabnormal	log10_cb	MSP1_42_3D7	exposure_antigen	0.0264479454166543	-0.000757028725949946	0.0536529195592586	0.0566809911007794	-504.47301822399	-493.381737764474	0.00887842967047803	0.0138235903706016	ns	ns	0.198383468852728	ns	ns
IgG	haart_2no	log10_cb_mot_ratio	Shiga_toxin	other_antigens	0.0149100659539013	-0.000460654350510013	0.0302807862583126	0.0570958452356347	-360.477999196399	-353.294651732382	0.0329752756508168	0.00772223300307231	ns	ns	0.395161943968003	ns	ns
IgG4	haartno	log10_cb	MSP1_42_3D7	exposure_antigen	-0.0611348564007362	-0.124147158579368	0.00187744577789539	0.0571067075094723	-170.01193111235	-161.725409307957	0.0226910506647294	0.0318114207822102	ns	ns	0.0999367381415766	ns	ns
IgG	haartno	log10_cb_mot_ratio	Shiga_toxin	other_antigens	0.0134358518811392	-0.00042188595192268	0.027293589714201	0.057263802432396	-511.917310030451	-503.788719426514	0.0238937970926556	0.00699190975877426	ns	ns	0.275873958984042	ns	ns
IgG	age_cat>30	log10_cb	Measles	vaccine_antigens	0.0289351540196457	-0.000913432845715014	0.0587837408850064	0.0573865037744225	-571.040763326671	-556.238989033109	0.00682017430697668	0.015166882196072	ns	ns	0.100426381605239	ns	ns
IgG3	gest_age	log10_cb	Pertussis_toxin	vaccine_antigens	0.0152316064768264	-0.000489319075030048	0.0309525320286829	0.0575197972720276	-302.072622581569	-291.011696512549	0.00888638899352312	0.00798789586460865	ns	ns	0.161055432361677	ns	ns
IgG2	age_cat>30	log10_cb_mot_ratio	Pertussis_toxin	vaccine_antigens	-0.016449330734037	-0.0334353885623006	0.000536727094226516	0.05763914117036	-887.178281464198	-872.554314220918	0.0118577621375507	0.00862945225520295	ns	ns	0.40347398819252	ns	ns
IgG3	seasonrainy	log10_cb	Measles	vaccine_antigens	-0.0330442985853142	-0.0672207089310536	0.00113211176042527	0.0580337600542996	-350.892828838046	-339.831902769027	0.00883627780695195	0.0173652375597989	ns	ns	0.709857882863936	ns	ns
IgG4	haart_2no	log10_cb	Pertussis_toxin	vaccine_antigens	-0.107394308839749	-0.218549884587692	0.00376126690819496	0.0580852173559942	-31.823099362796	-24.4253750068322	0.0303325443733091	0.0559057334929182	ns	ns	0.105277082873551	ns	ns
IgG4	age_cat>30	log10_cb	Pertussis_toxin	vaccine_antigens	-0.0707270055543574	-0.143961118414495	0.00250710730578008	0.0583213819150653	-33.0806992284283	-18.2389911589289	0.0122134315932535	0.0372137856404734	ns	ns	0.816499346810914	ns	ns
IgG1	motHIV+	log10_cb	OSP	other_antigens	-0.024504563126658	-0.0499000872395242	0.000890960986208104	0.0585420591338456	-470.514702031794	-459.373503615266	0.00855395041186102	0.0129050393706734	ns	ns	0.117084118267691	ns	ns
IgG2	log10_pf_exposure	log10_cb	RSV	other_antigens	-0.0889381678870137	-0.181132540661806	0.00325620488777868	0.0586005724877703	-701.592045319901	-690.592765255563	0.0089648789425858	0.0468404479735281	ns	ns	0.273469338276262	ns	ns
IgG2	graviditymultigravidae	log10_cb	Pertussis_toxin	vaccine_antigens	-0.0353751557023596	-0.0720564612936782	0.00130614988895889	0.0586773791702757	-325.578343203362	-314.497146786954	0.00871477877771276	0.0186385138142307	ns	ns	0.82148330838386	ns	ns
IgG1	mat_anemia_recatabnormal	log10_cb	MSP1_42_3D7	exposure_antigen	0.0309178674101672	-0.00115705477486649	0.062992789595201	0.0587994201061208	-409.443357339035	-398.322026544788	0.00858689221645315	0.0162988152926533	ns	ns	0.50110724286481	ns	ns
IgG4	cd4_cells_cat<350	log10_cb	Diphteria_toxin	vaccine_antigens	0.0671789583970824	-0.00258685029502836	0.136944767089193	0.0589537369222144	-70.6188399216648	-62.6003534182791	0.0243489813479689	0.0351852286060825	ns	ns	0.412676158455501	ns	ns
IgG2	age_catbetween_20_30	log10_cb	Pertussis_toxin	vaccine_antigens	-0.0360514029765965	-0.0734773939060326	0.00137458795283958	0.0589693574726846	-324.969034155835	-310.194105600624	0.00998961563824918	0.0190166370629949	ns	ns	0.617661911815008	ns	ns
IgG3	graviditymultigravidae	log10_cb	Shiga_toxin	other_antigens	0.0374955114590992	-0.00143908124449771	0.0764301041626961	0.0590317659495214	-294.07471739719	-282.933518980662	0.00850830812023529	0.0197850790355019	ns	ns	0.227103548797473	ns	ns
IgG1	cd4_cells_cat<350	log10_cb_mot_ratio	RSV	other_antigens	-0.00861053669192869	-0.0175557440105948	0.000334670626737369	0.0590318627599004	-491.73555926503	-483.860640825177	0.0255397696337446	0.00450873776924125	ns	ns	0.608544716357413	ns	ns
IgG4	hivload_cat400/999	log10_cb	Pneumo	other_antigens	-0.143759618896928	-0.293420714226601	0.00590147643274427	0.0595714354806269	21.3431452853333	34.980084378895	0.038287180797154	0.0755113775098153	ns	ns	0.834000096728777	ns	ns
IgG	hivload	log10_cb	Pertussis_toxin	vaccine_antigens	1.17048409641794e-07	-4.8459593199559e-09	2.38942778603545e-07	0.0596558322218697	-282.613431454437	-274.4848408505	0.0232820235456452	6.15016994945548e-08	ns	ns	0.677729891377305	ns	ns
IgG1	gest_age	log10_cb	MSP1_42_3D7	exposure_antigen	0.0127332316859839	-0.00052381607265984	0.0259902794446276	0.0597006143986514	-402.645996296456	-391.585070227437	0.00867692955880706	0.00673598488962276	ns	ns	0.301467023958725	ns	ns
IgG1	age_cat>30	log10_cb_mot_ratio	HepB	vaccine_antigens	-0.0234372498129837	-0.0478576876638167	0.000983188037849254	0.0598962518151102	-677.950218874949	-663.326251631669	0.0066775101187313	0.0124063514098172	ns	ns	0.171558771293468	ns	ns
IgG4	weight_g_catlow	log10_cb	Cp17	other_antigens	-0.0963403469222649	-0.196737672752564	0.0040569789080345	0.0599383231034016	9.19343022115522	20.2746266375633	0.00859599046974735	0.0510139133336282	ns	ns	0.13985608724127	ns	ns
IgG1	age_cat>30	log10_cb	OSP	other_antigens	0.0342628360633292	-0.00144477221244721	0.0699704443391056	0.059953185558609	-468.486802291564	-453.631871069526	0.00515753101013772	0.0181450041345757	ns	ns	0.167868919564105	ns	ns
IgG	hivload_cat1000/9999	log10_cb_mot_ratio	Pertussis_toxin	vaccine_antigens	-0.0139331159271018	-0.0284629918971496	0.000596760042945947	0.0599824843442993	-469.222914270665	-456.049269329516	0.0404373031140139	0.00732272545017361	ns	ns	0.209938695205048	ns	ns
IgG4	haart_2no	log10_cb	OSP	other_antigens	-0.203779805040788	-0.416466409366991	0.00890679928541421	0.0601583330706005	79.9588652723591	87.3219071611196	0.0300157427306402	0.106952413969534	ns	ns	0.105277082873551	ns	ns
IgG2	gest_age	log10_cb	HiB	vaccine_antigens	-0.0134101879958329	-0.0274011305549301	0.000580754563264329	0.0602299399061756	-370.856299015629	-359.79537294661	0.00862730967663661	0.00710888120684425	ns	ns	0.421609579343229	ns	ns
IgG3	haartno	log10_cb	VSP5	other_antigens	-0.0880895240067976	-0.1800666080942	0.0038875600806053	0.0603292475538522	-83.1973861364098	-74.8349109080637	0.0213573426377259	0.0464466863690948	ns	ns	0.281536488584644	ns	ns
IgG4	age_catbetween_20_30	log10_cb_mot_ratio	VSP5	other_antigens	0.0636915862974492	-0.0028036169506048	0.130186789545503	0.0604032492926049	10.9468463510667	25.6675367871349	0.00725828018808128	0.033785159039539	ns	ns	0.104011157863055	ns	ns
IgG3	weight_g_catlow	log10_cb	Pneumo	other_antigens	-0.0478686739522815	-0.0978855654073132	0.0021482175027502	0.0606158240904521	-411.070212792707	-399.938931740582	0.00839120887091804	0.0254163397122806	ns	ns	0.369337743586793	ns	ns
IgG	motHIV+	log10_cb	VSP5	other_antigens	0.0190322422985399	-0.0009056912490975	0.0389701758461773	0.061280560457207	-615.313051231288	-604.201703807319	0.00838722520862079	0.0101312876996094	ns	ns	0.0857927846400898	ns	ns
IgG4	hemoglobin	log10_cb_mot_ratio	VSP5	other_antigens	-0.0168025022150752	-0.0344162990296482	0.000811294599497817	0.0614497262236963	11.1753397702882	22.1953095718027	0.00863240469738369	0.00894916127538107	ns	ns	0.26995921954044	ns	ns
IgG	age_catbetween_20_30	log10_cb_mot_ratio	HepB	vaccine_antigens	-0.00737525992391454	-0.0151089004702916	0.000358380622462564	0.0615230844021991	-1216.5599275329	-1201.97813994233	0.00630920767371534	0.00392875214025611	ns	ns	0.143553863605131	ns	ns
IgG3	log10_pf_exposure	log10_cb_mot_ratio	HepB	vaccine_antigens	-0.0737564633678607	-0.151183163053931	0.0036702363182099	0.0618134847760649	-801.87867823025	-790.869035461309	0.00862864589368206	0.03933813434696	ns	ns	0.216347196716227	ns	ns
IgG1	malaria_placentariaYes	log10_cb_mot_ratio	Diphteria_toxin	vaccine_antigens	-0.0196694741182887	-0.0403226113063702	0.000983663069792803	0.0618738372257249	-986.34686006538	-975.368413418101	0.00871373316144819	0.010492760260082	ns	ns	0.228402592457342	ns	ns
IgG	malaria_placentariaYes	log10_cb_mot_ratio	Rotavirus	other_antigens	-0.0119732014308333	-0.0245469473956178	0.000600544533951135	0.0619111467200982	-1284.30095579141	-1273.29131302246	0.00861963517770059	0.00638833516103261	ns	ns	0.433378027040687	ns	ns
IgG1	prematurityYes	log10_cb	HiB	vaccine_antigens	-0.081654348879883	-0.167427308137646	0.00411861037788031	0.0619827266125535	-190.253502533261	-179.172306116853	0.00840890496562452	0.0435829766754985	ns	ns	0.230295834335227	ns	ns
IgG4	prematurityYes	log10_cb	Shiga_toxin	other_antigens	-0.121975092574863	-0.250109277067918	0.00615909191819317	0.0619963323888303	48.1627927699337	59.2439891863418	0.00840768188754371	0.0651075726245205	ns	ns	0.114488649153606	ns	ns
IgG3	hivload	log10_cb_mot_ratio	Pneumo	other_antigens	-1.0540480006737e-07	-2.16215509773698e-07	5.40590963895735e-09	0.0620469885124917	-293.390023221515	-285.371536718129	0.0235572420070925	5.58855437371326e-08	ns	ns	0.217164459793721	ns	ns
IgG1	treatmentmq_full	log10_cb	OSP	other_antigens	0.0395717473837987	-0.0020779379852617	0.0812214327528591	0.0624383219888363	-271.897715777926	-259.170581576758	0.0084939520881876	0.0211032744127571	ns	ns	0.371052996337623	ns	ns
IgG4	age	log10_cb_mot_ratio	Cp17	other_antigens	0.00328840381506368	-0.00017533916842403	0.0067521467985514	0.0626929013876555	-135.757272050629	-124.768390610222	0.0086077514665206	0.0017597697773235	ns	ns	0.217953258417606	ns	ns
IgG1	treatmentmq	log10_cb	VSP5	other_antigens	0.0689610768757948	-0.00372164640555195	0.141643800157142	0.0627358720896691	-38.1232827070207	-29.6624380102056	0.0201371543576053	0.0367158657015638	ns	ns	0.439151104627684	ns	ns
IgG3	treatmentmq_full	log10_cb_mot_ratio	Tetanus_toxin	vaccine_antigens	-0.0658874028977673	-0.135421114026326	0.00364630823079144	0.0631358586987487	-91.6668948817678	-78.9849589016152	0.0185875489458752	0.0352288584949297	ns	ns	0.441951010891241	ns	ns
IgG2	weight_g_catlow	log10_cb	Tetanus_toxin	vaccine_antigens	0.0438473544966991	-0.00245098524128753	0.0901456942346857	0.0633345505140118	-444.85902729076	-433.818509463709	0.00840256121939209	0.0235237914913845	ns	ns	0.098520411910685	ns	ns
IgG	hivload	log10_cb_mot_ratio	Diphteria_toxin	vaccine_antigens	7.09716461057287e-08	-4.14747333147651e-09	1.46090765542934e-07	0.0637868449621691	-361.714654430778	-353.869292880254	0.0245269702762568	3.78583195638693e-08	ns	ns	0.297671943156789	ns	ns
IgG	cd4_cells_cat<350	log10_cb	Measles	vaccine_antigens	0.0359136139285251	-0.00210632907081001	0.0739335569278602	0.0638570197517917	-200.37348323647	-192.327089555097	0.0228955697252455	0.0191768362302076	ns	ns	0.223499569131271	ns	ns
IgG4	motHIV+	log10_cb	Tetanus_toxin	vaccine_antigens	-0.0828438317677655	-0.170534713843294	0.00484705030776261	0.063987591018233	277.218764040272	288.340094834519	0.00812167416602572	0.0445599674896725	ns	ns	0.223956568563815	ns	ns
IgG1	cd4_cells_cat<350	log10_cb	Shiga_toxin	other_antigens	0.0173381950639537	-0.00102582579635608	0.0357022159242635	0.0639891332444684	-363.212817897502	-355.111376800125	0.0224418446946399	0.009264588097337	ns	ns	0.415688532937232	ns	ns
IgG1	gest_age	log10_cb	HiB	vaccine_antigens	0.0179489074914259	-0.00107810425354081	0.0369759192363925	0.0643748576172284	-189.461105724047	-178.400179655028	0.00825402872226999	0.00966773794151909	ns	ns	0.301467023958725	ns	ns
IgG1	hivload_cat1000/9999	log10_cb	Tetanus_toxin	vaccine_antigens	-0.0487458610423094	-0.100529435834562	0.00303771374994274	0.0647742473751542	-211.132019339039	-197.451027097066	0.00633620203267071	0.0261300242057592	ns	ns	0.143040956284393	ns	ns
IgG4	graviditymultigravidae	log10_cb	Diphteria_toxin	vaccine_antigens	-0.043413804166791	-0.0895101764070002	0.00268256807341829	0.0648080855622285	-190.181701423096	-179.09042096358	0.00813330167745607	0.0234228256964784	ns	ns	0.323039665247087	ns	ns
IgG3	graviditymultigravidae	log10_cb	HiB	vaccine_antigens	0.0819672013292229	-0.00508997210847953	0.169024374766925	0.0648867282278495	193.562538681777	204.703737098305	0.00799172540078208	0.0442391440995662	ns	ns	0.227103548797473	ns	ns
IgG	treatmentmq	log10_cb_mot_ratio	HepB	vaccine_antigens	-0.0106532450464344	-0.0219786214593309	0.000672131366462034	0.0649615764474752	-455.897961091863	-447.796519994486	0.022215418774449	0.00571361513423003	ns	ns	0.454731035132327	ns	ns
IgG1	malaria_placentariaYes	log10_cb_mot_ratio	Tetanus_toxin	vaccine_antigens	0.0201796940642614	-0.00128317627573509	0.0416425644042579	0.0652578835592406	-987.360324027462	-976.309584725446	0.00820577974602266	0.0109052572994506	ns	ns	0.228402592457342	ns	ns
IgG3	cd4_cells_cat<350	log10_cb_mot_ratio	Rotavirus	other_antigens	-0.0246508063094301	-0.0509154696617206	0.00161385704286036	0.0655332639508035	-274.209244987621	-266.305058022932	0.02360991290519	0.0132400327025984	ns	ns	0.83290905746926	ns	ns
IgG1	prematurityYes	log10_cb	Measles	vaccine_antigens	-0.0480318903511502	-0.0992210183577951	0.00315723765549464	0.0657988098100648	-496.86242121506	-485.781224798652	0.00807656820344071	0.026010232027185	ns	ns	0.230295834335227	ns	ns
IgG	log10_pf_exposure	log10_cb_mot_ratio	Shiga_toxin	other_antigens	-0.0237977787931403	-0.0491961240513754	0.0016005664650948	0.0661817454658793	-1462.70491754624	-1451.67465613943	0.00818291782500868	0.0129044967452702	ns	ns	0.308848145507437	ns	ns
IgG4	prematurityYes	log10_cb	Diphteria_toxin	vaccine_antigens	-0.0856076634712437	-0.177022224306732	0.00580689736424456	0.0663269065923918	-184.55899400847	-173.528732601665	0.00817054979844711	0.0464462897396582	ns	ns	0.114488649153606	ns	ns
IgG4	age_catbetween_20_30	log10_cb_mot_ratio	Cp17	other_antigens	0.0487579632125968	-0.00341124230992356	0.100927168735117	0.0668643157691069	-135.000456217781	-120.348614297238	0.00941439771750929	0.026504397928594	ns	ns	0.104011157863055	ns	ns
IgG1	malaria_placentariaYes	log10_cb	Pertussis_toxin	vaccine_antigens	0.0411777762439888	-0.00289589484103275	0.0852514473290103	0.0669627298603726	-565.688457032187	-554.547258615659	0.0078203485328554	0.0223965631909978	ns	ns	0.696621081364725	ns	ns
IgG4	weight_g_catlow	log10_cb_mot_ratio	VSP5	other_antigens	-0.0940446873564651	-0.194796937944306	0.0067075632313757	0.0672113747825977	10.6652868842816	21.6955482910865	0.00809580739175542	0.0511906219310834	ns	ns	0.311787581523138	ns	ns
IgG3	hemoglobin	log10_cb_mot_ratio	Pertussis_toxin	vaccine_antigens	-0.00938529271858465	-0.0194542502849554	0.000683664847786135	0.0675979133056275	-315.371737919554	-304.341476512749	0.00806347044390288	0.00511587777953233	ns	ns	0.473185393139392	ns	ns
IgG1	age_cat>30	log10_cb_mot_ratio	OSP	other_antigens	0.0113916934544588	-0.000836761663884706	0.0236201485728023	0.0677533857229112	-1096.83666149867	-1082.10234242932	0.00465245648021551	0.00621317373568039	ns	ns	0.171558771293468	ns	ns
IgG2	hivload_cat1000/9999	log10_cb	Diphteria_toxin	vaccine_antigens	-0.0706611512317715	-0.146595213538258	0.00527291107471463	0.0678403637553355	-120.136764542383	-106.634362713421	0.0230749653897359	0.0383002961674964	ns	ns	0.189953018514939	ns	ns
IgG2	treatmentmq_full	log10_cb_mot_ratio	Rotavirus	other_antigens	0.0266701312102393	-0.00198839445450424	0.0553286568749828	0.0679478327271347	-398.820492196386	-386.207325818395	0.0147081693983726	0.0145178739136088	ns	ns	0.475634829089943	ns	ns
IgG4	prematurityYes	log10_cb	HiB	vaccine_antigens	-0.179726396181191	-0.373087981746036	0.0136351893836538	0.0683697276733941	291.543507643973	302.614586006946	0.00789073874817414	0.0982495587503552	ns	ns	0.114488649153606	ns	ns
IgG	treatmentmq_split	log10_cb	Diphteria_toxin	vaccine_antigens	0.0298782560683385	-0.00233413717783893	0.062090649314516	0.0688545593542518	-357.214150029945	-344.600983651954	0.017539896359018	0.0163181968631035	ns	ns	0.321321276986509	ns	ns
IgG	haartno	log10_cb_mot_ratio	MSP1_42_3D7	exposure_antigen	0.0189209989816484	-0.00149907590605065	0.0393410738693475	0.0690136308913772	-425.853523263349	-417.724932659412	0.0211138015718317	0.0103029313010649	ns	ns	0.275873958984042	ns	ns
IgG1	hivload_cat>9999	log10_cb_mot_ratio	Measles	vaccine_antigens	-0.0276174551086739	-0.0574435834940643	0.00220867327671643	0.0691826111991028	-359.990150221856	-346.626006049547	0.0312906203088961	0.0150389086920125	ns	ns	0.24213913919686	ns	ns
IgG	cd4_cells	log10_cb	Measles	vaccine_antigens	-6.12107486906623e-05	-0.00012735645186057	4.93495447924506e-06	0.0693574694205101	-200.234160349858	-192.187766668485	0.0216342655110966	3.3363156726548e-05	ns	ns	0.242751142971785	ns	ns
IgG4	gest_age	log10_cb_mot_ratio	Shiga_toxin	other_antigens	0.0235034150645658	-0.0018862872171048	0.0488931173462363	0.069488937471125	-30.8482567689414	-19.8802813364818	0.008074996493458	0.0128989633150235	ns	ns	0.294826979186005	ns	ns
IgG2	hivload	log10_cb_mot_ratio	HepB	vaccine_antigens	9.18737075924901e-08	-7.50271164307505e-09	1.91250126828055e-07	0.0695798054644887	-294.54427591846	-286.82014298295	0.0240786065626124	5.00573575130244e-08	ns	ns	0.553683518459165	ns	ns
IgG2	treatmentmq_full	log10_cb	Measles	vaccine_antigens	-0.0574738517311786	-0.119768774057982	0.00482107059562498	0.0703261565988681	-132.704687910001	-120.114710002747	0.00828157212155312	0.0315561056727797	ns	ns	0.492283096192076	ns	ns
IgG1	seasonrainy	log10_cb_mot_ratio	OSP	other_antigens	-0.00904963706575824	-0.0188622603348819	0.000762986203365427	0.0705321910746407	-1061.76673644133	-1050.79876100887	0.00798941175992784	0.00498519699712857	ns	ns	0.493725337522485	ns	ns
IgG2	age_catbetween_20_30	log10_cb_mot_ratio	Pneumo	other_antigens	0.019114310330961	-0.00163914242087119	0.0398677630827932	0.0709005549100639	-657.203762258932	-642.678915131646	0.00461171298141394	0.0105422591135051	ns	ns	0.198521553748179	ns	ns
IgG2	age_cat>30	log10_cb	Diphteria_toxin	vaccine_antigens	0.0450959512120068	-0.00395083280989635	0.09414273523391	0.0713853632661794	-278.504896779308	-263.839190026858	0.00711924230382877	0.0249184332117362	ns	ns	0.499697542863256	ns	ns
IgG1	treatmentmq_split	log10_cb_mot_ratio	VSP5	other_antigens	-0.0259502577717161	-0.0541874350253937	0.00228691948196142	0.0714233489734695	-406.522014662921	-393.840078682769	0.0100164536159729	0.0143062049417565	ns	ns	0.993358292267286	ns	ns
IgG1	hivload_cat1000/9999	log10_cb	Shiga_toxin	other_antigens	-0.022635544939345	-0.0472867093710488	0.00201561949235883	0.0715204781421967	-380.364762165932	-366.68376992396	0.0361330318470234	0.0124389929796223	ns	ns	0.143040956284393	ns	ns
IgG2	weight_g_catlow	log10_cb	Measles	vaccine_antigens	0.0592668977813777	-0.00525991289374998	0.123793708456505	0.0716832449589989	-261.191445528651	-250.1509277016	0.0077067052621147	0.0327855220838585	ns	ns	0.100356542942599	ns	ns
IgG	graviditymultigravidae	log10_cb	VSP5	other_antigens	0.0208648387093321	-0.0018647348623955	0.0435944122810597	0.0718481371383426	-615.048751125312	-603.937403701343	0.00751322906481267	0.0115498353224222	ns	ns	0.210360210985053	ns	ns
IgG4	gest_age	log10_cb	Diphteria_toxin	vaccine_antigens	0.0180658283671948	-0.00162912754321838	0.037760784277608	0.072052114886565	-181.156416640544	-170.146773871602	0.00775790998545955	0.0100064037948485	ns	ns	0.09170269167381	ns	ns
IgG4	treatmentmq_split	log10_cb_mot_ratio	RSV	other_antigens	0.031246308971711	-0.00285846745466052	0.0653510853980826	0.0722809966905817	-333.059885589351	-320.51669184115	0.0436277217171254	0.0172746179064047	ns	ns	0.505966976834072	ns	ns
IgG1	haartno	log10_cb	Measles	vaccine_antigens	-0.0517225059856962	-0.108231346061502	0.00478633409010911	0.0724449527105791	-200.111555556385	-191.749080328039	0.0188424167558736	0.028535894545082	ns	ns	0.490610682880025	ns	ns
IgG2	graviditymultigravidae	log10_cb_mot_ratio	Diphteria_toxin	vaccine_antigens	-0.0161977562508571	-0.0338947206608312	0.00149920815911694	0.0726639899471381	-734.530673637898	-723.647810296826	0.00804513192121792	0.00898963592050748	ns	ns	0.241784432842596	ns	ns
IgG2	hivload_cat>9999	log10_cb_mot_ratio	MSP1_42_3D7	exposure_antigen	0.044133072939731	-0.00416038286336201	0.092426528742824	0.0728274691427673	-254.867280785227	-241.597479034439	0.00298206120992606	0.0243447603183796	ns	ns	0.509792283999371	ns	ns
IgG	mat_anemiaabnormal	log10_cb_mot_ratio	Pneumo	other_antigens	-0.00583649781185721	-0.0122277868882351	0.000554791264520638	0.0733199335760829	-1261.75419641958	-1250.78622098712	0.00776717431285545	0.00324702520798854	ns	ns	0.17107984501086	ns	ns
IgG1	hivload	log10_cb	Diphteria_toxin	vaccine_antigens	-1.86080217602253e-07	-3.90094812410066e-07	1.79343772055594e-08	0.0734127021371618	-170.965317712636	-162.783154256499	0.0198360285018779	1.02956205779799e-07	ns	ns	0.513888914960133	ns	ns
IgG1	age_cat>30	log10_cb_mot_ratio	RSV	other_antigens	-0.01291005838867	-0.0270572701255924	0.0012371533482524	0.0735251876972004	-1010.27340863938	-995.552718203312	0.0114608966699781	0.00718797409664197	ns	ns	0.171558771293468	ns	ns
IgG2	treatmentmq_split	log10_cb_mot_ratio	HepB	vaccine_antigens	-0.0173938198918122	-0.0364660704945765	0.00167843071095197	0.0735769149966545	-525.683818658784	-513.211843409117	0.00964774684730862	0.00965911199325144	ns	ns	0.369766905488883	ns	ns
IgG4	prematurityYes	log10_cb	Rotavirus	other_antigens	-0.153061354171961	-0.320832515581674	0.0147098072377523	0.0735998458844611	208.259386588871	219.340583005279	0.00745670234457596	0.0852479228630441	ns	ns	0.114488649153606	ns	ns
IgG1	haartno	log10_cb	Rotavirus	other_antigens	-0.0372122270559484	-0.078035133616863	0.0036106795049661	0.0736054860238552	-278.148450336731	-269.785975108385	0.0186252285773231	0.0206147950494698	ns	ns	0.490610682880025	ns	ns
IgG3	log10_pf_exposure	log10_cb	Rotavirus	other_antigens	-0.191917338123172	-0.402312715753711	0.0184780395073677	0.073644571237583	-221.347961934345	-210.297222632329	0.0075298886305637	0.106901625520255	ns	ns	0.515511998663081	ns	ns
IgG1	hemoglobin	log10_cb	OSP	other_antigens	0.00710492017911422	-0.00068751905762757	0.014897359415856	0.0737752287503817	-466.931200545044	-455.809869750798	0.00734405535885907	0.00395971429224982	ns	ns	0.258213300626336	ns	ns
IgG	haart_2no	log10_cb	Shiga_toxin	other_antigens	-0.0300169821056557	-0.0630058596421726	0.00297189543086128	0.0739565751889405	-245.319381150602	-237.956339261841	0.0260575015317458	0.0165889154037387	ns	ns	0.287889485143146	ns	ns
IgG3	seasonrainy	log10_cb_mot_ratio	RSV	other_antigens	0.0195278753233107	-0.00191192565248105	0.0409676762991025	0.0740655649408547	-614.703315164916	-603.735339732456	0.00770925936708999	0.0108922587275784	ns	ns	0.518458954585983	ns	ns
IgG1	haartno	log10_cb_mot_ratio	MSP1_42_3D7	exposure_antigen	0.0220649561409062	-0.00221411767832653	0.046344029960139	0.0744404906291889	-386.928996332625	-378.746832876488	0.01963438092475	0.0122524632251464	ns	ns	0.604056454445619	ns	ns
IgG4	weight_g_catlow	log10_cb	Tetanus_toxin	vaccine_antigens	0.142638028747124	-0.0142164009046859	0.299492458398934	0.0745348424425392	277.256076972416	288.367424396385	0.0073128164707178	0.0797042155830102	ns	ns	0.149069684885078	ns	ns
IgG2	weight_g	log10_cb	Cp17	other_antigens	-2.28382280509686e-05	-4.79695794883938e-05	2.29312338645661e-06	0.0747273502539181	-502.89944514122	-491.818248724812	0.0073729436375416	1.27697483332653e-05	ns	ns	0.18461498564895	ns	ns
IgG3	haartno	log10_cb_mot_ratio	HiB	vaccine_antigens	-0.16875517490062	-0.354770647577196	0.0172602977759568	0.0749435024855081	73.2556020414647	81.4377654976017	0.0195367640805325	0.0938729275773501	ns	ns	0.359077664410827	ns	ns
IgG3	weight_g_catlow	log10_cb_mot_ratio	Pneumo	other_antigens	-0.026893504910531	-0.056516774993559	0.0027297651724969	0.07501294480884	-706.534923360536	-695.494405533484	0.00745295304103055	0.0150513308397184	ns	ns	0.52509061366188	ns	ns
IgG	graviditymultigravidae	log10_cb	MSP1_42_3D7	exposure_antigen	0.0246236175759183	-0.00250982783353043	0.0517570629853671	0.075128646780376	-508.788608442034	-497.677261018065	0.0072695632835057	0.013787624533303	ns	ns	0.210360210985053	ns	ns
IgG1	age_catbetween_20_30	log10_cb_mot_ratio	Pertussis_toxin	vaccine_antigens	-0.00802074620351889	-0.0168672448536029	0.000825752446565152	0.0753942631872324	-1174.38506894502	-1159.65074987567	0.00519433196296393	0.00449483050258599	ns	ns	0.175919947436876	ns	ns
IgG	malaria_placentariaYes	log10_cb	VSP5	other_antigens	-0.0364634180519457	-0.0766971993090601	0.00377036320516878	0.0755165947639155	-614.966627060916	-603.855279636948	0.00724150171595728	0.0204444463707864	ns	ns	0.416083665288429	ns	ns
IgG	treatmentmq_full	log10_cb_mot_ratio	Pertussis_toxin	vaccine_antigens	-0.00645696077918635	-0.013585958092416	0.000672036534043317	0.0755702228873254	-884.426160292786	-871.789939095928	0.010533463193521	0.00361156830926943	ns	ns	0.432650816263455	ns	ns
IgG3	haart_2no	log10_cb	VSP5	other_antigens	-0.0893841689577418	-0.188196203603399	0.00942786568791534	0.0756375792357714	-52.304882586229	-44.9071582302653	0.025328196075351	0.0496975454233595	ns	ns	0.371745959110723	ns	ns
IgG4	motHIV+	log10_cb_mot_ratio	Measles	vaccine_antigens	0.0485470602547309	-0.00504637620757931	0.102140496717041	0.0756536512046797	-34.5559594917933	-23.5670780513854	0.00753491787466309	0.0272283798765912	ns	ns	0.176525186144253	ns	ns
IgG4	hemoglobin	log10_cb	Shiga_toxin	other_antigens	-0.0166430848350313	-0.0350248471968153	0.00173867752675273	0.0757984977537757	49.708246848364	60.8295776426106	0.00719706588485225	0.00934066021297971	ns	ns	0.772752124719545	ns	ns
IgG2	age	log10_cb_mot_ratio	Pertussis_toxin	vaccine_antigens	-0.000844655175756442	-0.00177859228379119	8.9281932278303e-05	0.0761151069312283	-886.926295563823	-875.958320131363	0.00755322006644266	0.000474476634717227	ns	ns	0.369757646325752	ns	ns
IgG	haartno	log10_cb_mot_ratio	Pneumo	other_antigens	-0.017673256173523	-0.037237980374403	0.00189146802735696	0.0761640467721025	-427.748740253434	-419.674696606747	0.0200234571707611	0.00986929394950787	ns	ns	0.275873958984042	ns	ns
IgG1	haart_2no	log10_cb	Rotavirus	other_antigens	-0.0370432220940571	-0.0780728525887519	0.0039864084006377	0.0761938401093365	-205.237816023456	-197.840091667492	0.025190279109883	0.0206358661930799	ns	ns	0.426859088441986	ns	ns
IgG4	hemoglobin	log10_cb_mot_ratio	OSP	other_antigens	-0.0228393192662429	-0.0481804183833993	0.00250177985091348	0.0771312055829829	217.65608018424	228.644961624648	0.00742524611865203	0.0128746562788062	ns	ns	0.26995921954044	ns	ns
IgG4	weight_g_catlow	log10_cb_mot_ratio	HiB	vaccine_antigens	-0.129997160198072	-0.274249697779529	0.014255377383384	0.0771638916601206	217.735064780084	228.734344844421	0.0073969910138576	0.0732892179671194	ns	ns	0.311787581523138	ns	ns
IgG1	cd4_cells	log10_cb	OSP	other_antigens	-7.08457608370155e-05	-0.000149668374614179	7.97685294014822e-06	0.0776289061492909	-164.708050119164	-156.606609021786	0.0195550914216495	3.97657492852894e-05	ns	ns	0.96362650283145	ns	ns
IgG	age_catbetween_20_30	log10_cb	MSP1_42_3D7	exposure_antigen	0.0248790851265706	-0.00280776347821243	0.0525659337313535	0.0780193043225958	-506.818896758043	-492.003766859418	0.00402759605978698	0.014068638404628	ns	ns	0.218454052103268	ns	ns
IgG1	age	log10_cb	Pertussis_toxin	vaccine_antigens	-0.00150274278908489	-0.00317547461108275	0.000169989032912978	0.078091683164953	-565.434594825236	-554.293396408708	0.00698872325104782	0.000850018685321177	ns	ns	0.18221392738489	ns	ns
IgG1	log10_pf_exposure	log10_cb_mot_ratio	Pertussis_toxin	vaccine_antigens	-0.0372594932668924	-0.0787508041265341	0.00423181759274938	0.0782078635485139	-1175.96859778986	-1164.91785848784	0.00719582115134254	0.021081682619714	ns	ns	0.364970029893065	ns	ns
IgG3	age	log10_cb	Shiga_toxin	other_antigens	0.00235193035124838	-0.000267662073050948	0.00497152277554772	0.0782743236236706	-293.606852474535	-282.465654058007	0.00697615461549894	0.00133117722715451	ns	ns	0.442719831048602	ns	ns
IgG2	weight_g	log10_cb	Shiga_toxin	other_antigens	-2.68414285237762e-05	-5.68229886204473e-05	3.14013157289495e-06	0.0791207081352644	-394.752057621937	-383.650726901765	0.00701147048104223	1.52346601026244e-05	ns	ns	0.18461498564895	ns	ns
IgG1	age	log10_cb_mot_ratio	VSP5	other_antigens	-0.00123416340631744	-0.00261413005478202	0.000145803242147136	0.0794250192908199	-676.043450546364	-664.992711244348	0.00711023482296091	0.000701159310370651	ns	ns	0.329610572442131	ns	ns
IgG1	hivload	log10_cb_mot_ratio	Pertussis_toxin	vaccine_antigens	-4.8476443978456e-08	-1.02797922554692e-07	5.8450345977804e-09	0.0797198426994049	-445.951420376266	-437.93293387288	0.0197075630278046	2.73961368434825e-08	ns	ns	0.372025932597223	ns	ns
IgG3	weight_g	log10_cb	VSP5	other_antigens	3.92340545325652e-05	-4.80259703164479e-06	8.32707060967751e-05	0.0805743538373136	-166.193915516766	-155.062634464642	0.00684324388055468	2.23774501650821e-05	ns	ns	0.376013651240797	ns	ns
IgG	log10_pf_exposure	log10_cb	Measles	vaccine_antigens	0.107362714094743	-0.0131623076906604	0.227887735880147	0.0806164542335991	-558.927241607798	-547.917598838857	0.00712539957591407	0.0612350716017598	ns	ns	0.376210119756796	ns	ns
IgG2	prematurityYes	log10_cb	RSV	other_antigens	-0.032638694585182	-0.0692944048668294	0.00401701569646547	0.0807478412743922	-705.141876084105	-694.091136782089	0.00701879814554751	0.0186247200762592	ns	ns	0.573671570653583	ns	ns
IgG3	hivload_cat>9999	log10_cb	Tetanus_toxin	vaccine_antigens	-0.130402115739893	-0.277233988929802	0.0164297574500157	0.0811849289676404	-13.4300301458133	0.250962096159217	0.013552674599547	0.0740914549839718	ns	ns	0.470259170408245	ns	ns
IgG3	weight_g	log10_cb_mot_ratio	Cp17	other_antigens	-2.94966454008517e-06	-6.27004722535333e-06	3.70718145182982e-07	0.081448054474493	-1683.19483108703	-1672.15431325998	0.00699499823691241	1.68705811918706e-06	ns	ns	0.477750550439216	ns	ns
IgG4	treatmentmq_full	log10_cb	Pertussis_toxin	vaccine_antigens	-0.0812210317750936	-0.172755502504056	0.0103134389538688	0.0816545386069101	8.39075685509697	21.0953557853923	0.00685930202633545	0.0463772952981319	ns	ns	0.743637465442033	ns	ns
IgG2	seasonrainy	log10_cb_mot_ratio	Measles	vaccine_antigens	0.0145870088364422	-0.00185495972905438	0.0310289774019388	0.0818354036630709	-750.170800004247	-739.298747485685	0.00737408559862951	0.00835199420315953	ns	ns	0.381898550427664	ns	ns
IgG	haart_2no	log10_cb	HepB	vaccine_antigens	-0.0411707056148486	-0.0877238664564958	0.00538245522679857	0.0822541386123275	-182.108739530077	-174.816289133547	0.0246216902396899	0.0234015616426239	ns	ns	0.287889485143146	ns	ns
IgG	motHIV+	log10_cb	RSV	other_antigens	-0.00858090857628632	-0.0182662457958	0.00110442864322736	0.0822676990328113	-1042.89331942869	-1031.80203896917	0.00682225754201604	0.00492138436235549	ns	ns	0.104704344223578	ns	ns
IgG3	gest_age	log10_cb_mot_ratio	HiB	vaccine_antigens	0.0295964554304501	-0.0038503001291114	0.0630432109900115	0.08263300716031	126.801302897316	137.769278329775	0.00708533661667976	0.0169922619880739	ns	ns	0.231372420048868	ns	ns
IgG2	mat_anemiaabnormal	log10_cb	VSP5	other_antigens	0.0468799519578989	-0.00618291459043936	0.0999428185062372	0.0831255780222554	-39.6077063804045	-28.5467803113851	0.00683500711555773	0.0269615583934687	ns	ns	0.290939523077894	ns	ns
IgG3	treatmentmq	log10_cb	Diphteria_toxin	vaccine_antigens	-0.0437947036482076	-0.0935091041856404	0.00591969688922517	0.0836897086916915	-132.38208802428	-123.97002489008	0.0165970457524277	0.0251091656604785	ns	ns	0.672312464116305	ns	ns
IgG2	hivload	log10_cb	Tetanus_toxin	vaccine_antigens	-1.82113517856114e-07	-3.89155946610724e-07	2.49289108984962e-08	0.0840958893086591	-165.050978462007	-156.92238785807	0.0182007377837131	1.04463080159876e-07	ns	ns	0.592216253839053	ns	ns
IgG3	prematurityYes	log10_cb_mot_ratio	Cp17	other_antigens	0.00609708371897569	-0.000838285445724816	0.0130324528836762	0.0846404547194569	-1650.06822208098	-1639.07934064057	0.00690057815858691	0.00352354464774178	ns	ns	0.564643240053079	ns	ns
IgG4	haart_2no	log10_cb_mot_ratio	Cp17	other_antigens	-0.105756742601048	-0.226358176322585	0.0148446911204879	0.0847839519188818	-21.8723151539484	-14.7262352499268	0.0252666154158886	0.0605779497636258	ns	ns	0.448240206218389	ns	ns
IgG	haartno	log10_cb	Shiga_toxin	other_antigens	-0.0276225227526613	-0.0591168988143325	0.00387185330900988	0.0850182339838221	-342.002325674675	-333.690271801278	0.0169523409801848	0.0159012231600356	ns	ns	0.449298694088973	ns	ns
IgG3	prematurityYes	log10_cb	HiB	vaccine_antigens	-0.138769964107565	-0.296863638403401	0.0193237101882704	0.0851270763756475	172.967955439666	184.049151856074	0.00665876635838614	0.0803305957845406	ns	ns	0.425766769220579	ns	ns
IgG1	age_cat>30	log10_cb	Diphteria_toxin	vaccine_antigens	0.031407560806197	-0.00441775358663399	0.0672328751990279	0.0855120952599478	-464.391764537874	-449.589990244311	0.0119992312142385	0.018203820686194	ns	ns	0.199528222273212	ns	ns
IgG	age	log10_cb	Measles	vaccine_antigens	0.00143859231096707	-0.000203243962146019	0.00308042858408016	0.0856823349556308	-571.95964431436	-560.858313594188	0.00657870475843414	0.000834273382852237	ns	ns	0.149944086172354	ns	ns
IgG4	haart_2no	log10_cb	Rotavirus	other_antigens	-0.156531183707733	-0.335526508505266	0.0224641410898013	0.0857015869374707	51.0755264051927	58.4732507611565	0.022984949106415	0.0900257576579048	ns	ns	0.13331357968051	ns	ns
IgG2	prematurityYes	log10_cb	HepB	vaccine_antigens	-0.0754552424909253	-0.161589044078136	0.0106785590962851	0.0857323693680659	-248.847014780776	-237.942645971269	0.00702499170764503	0.0437553035389843	ns	ns	0.573671570653583	ns	ns
IgG	hemoglobin	log10_cb	OSP	other_antigens	0.00350839603024279	-0.000501119192319955	0.00751791125280553	0.0861062157454808	-858.767795015565	-847.676514556048	0.00657412123796353	0.00203734419047284	ns	ns	0.241097404087346	ns	ns
IgG2	graviditymultigravidae	log10_cb_mot_ratio	MSP1_42_3D7	exposure_antigen	-0.0167780136277445	-0.0359680175446197	0.00241199028913076	0.08635158315807	-701.863499780423	-690.864219716086	0.00676436346618692	0.00974970980361137	ns	ns	0.241784432842596	ns	ns
IgG4	haartno	log10_cb	Rotavirus	other_antigens	-0.148072622816077	-0.317688196627193	0.0215429509950384	0.086468086301428	63.6814344659083	72.0439096942545	0.0164362647252532	0.08565265400926	ns	ns	0.134505912024444	ns	ns
IgG2	weight_g_catlow	log10_cb_mot_ratio	HepB	vaccine_antigens	0.0202321021545232	-0.00292762580134193	0.0433918301103883	0.0865929704140825	-831.71990126409	-820.913544801451	0.0072003830204882	0.011763241298848	ns	ns	0.242460317159431	ns	ns
IgG1	cd4_cells	log10_cb_mot_ratio	RSV	other_antigens	1.32623983509821e-05	-1.94826488927587e-06	2.84730615912401e-05	0.0867417155550021	-491.089190143977	-483.214271704125	0.019345054689011	7.66677500067016e-06	ns	ns	0.40479467259001	ns	ns
IgG4	age_cat>30	log10_cb_mot_ratio	Pertussis_toxin	vaccine_antigens	0.0495646272148012	-0.00721370343463542	0.106342957864238	0.0868411777397973	-194.297619014733	-179.59060380566	0.0124539878406233	0.0288477517526671	ns	ns	0.196208218672522	ns	ns
IgG2	cd4_cells_cat<350	log10_cb	Shiga_toxin	other_antigens	-0.0437588544485674	-0.0940012792260877	0.00648357032895294	0.0871254113764732	-141.716486596146	-133.670092914773	0.0181835248875166	0.0253417200489723	ns	ns	0.304938939817656	ns	ns
IgG4	age	log10_cb_mot_ratio	RSV	other_antigens	0.00164651970706547	-0.000241905461626289	0.00353494487575722	0.0872126011514248	-486.049067175977	-475.102144461493	0.00682779264719535	0.000959364840362488	ns	ns	0.217953258417606	ns	ns
IgG	mat_anemiaabnormal	log10_cb	Tetanus_toxin	vaccine_antigens	-0.0137861128683841	-0.0296081384405939	0.00203591270382576	0.0874314019223082	-755.49977406328	-744.428695700308	0.00653537547231309	0.00803937879628701	ns	ns	0.306009906728079	ns	ns
IgG2	age	log10_cb_mot_ratio	VSP5	other_antigens	-0.00148745897014601	-0.00319774712504426	0.000222829184752238	0.0880075891339474	-545.097570604027	-534.119123956748	0.00670479531288826	0.000868906424316083	ns	ns	0.369757646325752	ns	ns
IgG	treatmentmq_split	log10_cb_mot_ratio	HiB	vaccine_antigens	-0.0062511608207387	-0.0134585553748839	0.000956233733406481	0.0887039352761034	-882.134627298438	-869.475483402744	0.0252080909384669	0.00365143583979289	ns	ns	0.921881306888525	ns	ns
IgG1	cd4_cells_cat<350	log10_cb	HepB	vaccine_antigens	-0.0733343612820876	-0.158061828679766	0.0113931061155913	0.0890761142008355	-29.039539457742	-21.0210529543562	0.0180212601350744	0.0427308930475975	ns	ns	0.415688532937232	ns	ns
IgG	malaria_placentariaYes	log10_cb	MSP1_42_3D7	exposure_antigen	0.0416351481307338	-0.00640981073442662	0.0896801069958942	0.089160785418949	-508.508481242224	-497.397133818256	0.00634216104189034	0.0244136284041591	ns	ns	0.416083665288429	ns	ns
IgG3	hivload	log10_cb_mot_ratio	RSV	other_antigens	1.04263730074903e-07	-1.62545231115611e-08	2.24781983261366e-07	0.0892234492885057	-275.418775617236	-267.400289113851	0.01799624068008	6.07813822998223e-08	ns	ns	0.22944152470847	ns	ns
IgG3	graviditymultigravidae	log10_cb	Pneumo	other_antigens	-0.0277429723138807	-0.0597774933119333	0.00429154868417188	0.0893668641873186	-412.286546861851	-401.145348445323	0.00626663615634127	0.0162787250565578	ns	ns	0.250227219724492	ns	ns
IgG	graviditymultigravidae	log10_cb_mot_ratio	HepB	vaccine_antigens	-0.00662356366481364	-0.0142781875630628	0.00103106023343548	0.0896180629191613	-1217.66141295055	-1206.72507225762	0.0066967738087278	0.00388867111204525	ns	ns	0.418217626956086	ns	ns
IgG1	hivload_cat1000/9999	log10_cb_mot_ratio	Pertussis_toxin	vaccine_antigens	-0.0147740641676896	-0.0319061774483421	0.00235804911296292	0.0902229847658173	-445.841674278347	-432.477530106038	0.0363532543334379	0.00863834165801928	ns	ns	0.421040595573814	ns	ns
IgG3	graviditymultigravidae	log10_cb_mot_ratio	Cp17	other_antigens	0.00314384300276073	-0.000496917154899116	0.00678460316042058	0.0902903438298479	-1689.78069901899	-1678.72995971697	0.00640341984993709	0.00184986563567319	ns	ns	0.210677468936312	ns	ns
IgG3	hivload_cat400/999	log10_cb_mot_ratio	MSP1_42_3D7	exposure_antigen	-0.0225959799636221	-0.0488189924029732	0.00362703247572892	0.0904719454665623	-362.876070520056	-349.511926347746	0.00490097878313489	0.0132221481986942	ns	ns	0.316651809132968	ns	ns
IgG3	age_catbetween_20_30	log10_cb_mot_ratio	Pertussis_toxin	vaccine_antigens	0.0327798671032258	-0.00522064190204946	0.070780376108501	0.0906224313710065	-317.329318702647	-302.594999633292	0.00460610672983286	0.0193077344774231	ns	ns	0.578264601131178	ns	ns
IgG1	gest_age	log10_cb	Pertussis_toxin	vaccine_antigens	-0.00895892214372302	-0.0193509685349357	0.00143312424748963	0.0908188492831573	-546.304254866271	-535.243328797251	0.0063496593625374	0.0052802606385593	ns	ns	0.301467023958725	ns	ns
IgG3	age	log10_cb_mot_ratio	Pertussis_toxin	vaccine_antigens	0.0021829486313256	-0.000350416289243944	0.00471631355189514	0.0909725800504412	-318.839862042775	-307.789122740759	0.00636213939267061	0.00128719951500287	ns	ns	0.450435546295748	ns	ns
IgG3	haart_2no	log10_cb_mot_ratio	HiB	vaccine_antigens	-0.16538389143364	-0.358039069348139	0.0272712864808581	0.0914470708073692	54.7892261676373	62.0093839094301	0.0231371117882033	0.0968085619065634	ns	ns	0.270896417234588	ns	ns
IgG1	haart_2no	log10_cb	VSP5	other_antigens	-0.104864281122791	-0.227006245994831	0.0172776837492494	0.0914698046661399	-15.4230405813685	-8.02531622540475	0.0217702029981308	0.0614313415273185	ns	ns	0.426859088441986	ns	ns
IgG1	weight_g	log10_cb	MSP1_42_3D7	exposure_antigen	2.51827851080821e-05	-4.09683613765984e-06	5.4462406353824e-05	0.0915789971677295	-412.704751926416	-401.573470874291	0.0061569794903007	1.48785895840358e-05	ns	ns	0.500077591226478	ns	ns
IgG2	treatmentmq	log10_cb	HiB	vaccine_antigens	-0.0358993268089338	-0.0776921344289577	0.00589348081109019	0.0915898952919106	-174.846612726634	-166.410059660517	0.0152712577528404	0.0211099972691366	ns	ns	0.878657064157584	ns	ns
IgG	treatmentmq	log10_cb	MSP1_42_3D7	exposure_antigen	-0.0326674119040273	-0.0707058479424417	0.0053710241343871	0.0916527278940548	-197.47000035587	-189.05793722167	0.0153895352724863	0.0192120066143592	ns	ns	0.641569095258383	ns	ns
IgG4	age	log10_cb_mot_ratio	MSP1_42_3D7	exposure_antigen	-0.000400985791994038	-0.000868398615994597	6.6427032006522e-05	0.0923904768880664	-1286.32872627823	-1275.36075084577	0.00645430790001511	0.000237464023912851	ns	ns	0.217953258417606	ns	ns
IgG1	weight_g_catlow	log10_cb	VSP5	other_antigens	-0.058624739812045	-0.126965811158708	0.00971633153461827	0.0924277652228855	-222.531524728717	-211.400243676593	0.00610779070021283	0.0347278656293475	ns	ns	0.624220734057744	ns	ns
IgG4	mat_anemiaabnormal	log10_cb_mot_ratio	Rotavirus	other_antigens	0.0463995540073645	-0.00769397533882125	0.10049308335355	0.092440201917594	-36.7405232942858	-25.7205534927713	0.00633961923956172	0.027483666535375	ns	ns	0.31480657159971	ns	ns
IgG	treatmentmq_full	log10_cb_mot_ratio	Shiga_toxin	other_antigens	-0.00471409730238155	-0.0102177393157128	0.000789544710949719	0.0927108891993117	-984.480268587982	-971.79833260783	0.0129790608250059	0.00278838886271906	ns	ns	0.432650816263455	ns	ns
IgG3	prematurityYes	log10_cb	VSP5	other_antigens	-0.0756996902232413	-0.164054648937336	0.0126552684908537	0.0928238245124141	-172.636337891855	-161.555141475447	0.00618818416965272	0.0448949428598909	ns	ns	0.425766769220579	ns	ns
IgG3	age	log10_cb_mot_ratio	Rotavirus	other_antigens	-0.00078869977157747	-0.00171036019910449	0.000132960655949551	0.0932123412475135	-913.382450030431	-902.331710728415	0.0062289317108134	0.000468294498624148	ns	ns	0.450435546295748	ns	ns
IgG1	treatmentmq_full	log10_cb	Tetanus_toxin	vaccine_antigens	-0.0241278672928724	-0.0523602856645672	0.00410455107882231	0.0934466854625384	-410.318671416526	-397.591537215357	0.0170902082571842	0.0143049453304209	ns	ns	0.371052996337623	ns	ns
IgG2	treatmentmq_split	log10_cb_mot_ratio	HiB	vaccine_antigens	-0.0128672116971292	-0.027933422349851	0.00219899895559258	0.0936557986917626	-624.063173485405	-611.404029589711	0.00504678412365678	0.00763289717718841	ns	ns	0.369766905488883	ns	ns
IgG4	hivload	log10_cb_mot_ratio	Measles	vaccine_antigens	3.84856404431606e-07	-6.6357650920758e-08	8.3607045978397e-07	0.0937384215694253	6.61903965970873	14.5522123571329	0.0177582078219483	2.27484312556051e-07	ns	ns	0.323248469242502	ns	ns
IgG4	prematurityYes	log10_cb	OSP	other_antigens	-0.165884005438001	-0.360089446332811	0.0283214354568087	0.0938126384859841	276.246988505808	287.307914574828	0.0061726679638866	0.0986769406859102	ns	ns	0.131337693880378	ns	ns
IgG3	motHIV+	log10_cb_mot_ratio	Pertussis_toxin	vaccine_antigens	0.0279302177135972	-0.00479541276158219	0.0606558481887766	0.0940803820925367	-318.78545268151	-307.734713379494	0.00617823393600569	0.0166278514926084	ns	ns	0.219520891549252	ns	ns
IgG	cd4_cells	log10_cb_mot_ratio	MSP1_42_3D7	exposure_antigen	2.12616988716823e-05	-3.69961699295754e-06	4.62230147363221e-05	0.0941500145236071	-386.769451564286	-378.924090013763	0.0182269433395088	1.25799327763442e-05	ns	ns	0.910948997127461	ns	ns
IgG2	hemoglobin	log10_cb	Cp17	other_antigens	0.00625471535031368	-0.00107558737809789	0.0135850180787253	0.0941582611900726	-497.818832191978	-486.747753829006	0.00613169164690641	0.00372462299825029	ns	ns	0.50214154495553	ns	ns
IgG3	haartno	log10_cb_mot_ratio	OSP	other_antigens	-0.142775205337715	-0.310372608597311	0.0248221979218813	0.0942027800049568	49.6916753308195	57.8738387869565	0.0162462515321303	0.0845782271332588	ns	ns	0.359077664410827	ns	ns
IgG1	gest_age	log10_cb	HepB	vaccine_antigens	0.0176674535330602	-0.00306946161848708	0.0384043686846074	0.0946473270133472	-137.986834729736	-126.977191960795	0.00623079137430615	0.0105357913675847	ns	ns	0.301467023958725	ns	ns
IgG1	prematurityYes	log10_cb_mot_ratio	Measles	vaccine_antigens	-0.0178279279025549	-0.0387567986282505	0.00310094282314071	0.0947017289239472	-1013.87893174426	-1002.89005030385	0.00627118065633014	0.0106330043401502	ns	ns	0.66291210246763	ns	ns
IgG	age_catbetween_20_30	log10_cb	VSP5	other_antigens	0.0195022611448815	-0.00339906861872463	0.0424035909084876	0.0948119241284865	-620.676422969046	-605.861293070421	0.0291718614611929	0.0116369519705345	ns	ns	0.221227822966469	ns	ns
IgG4	hivload	log10_cb_mot_ratio	Pneumo	other_antigens	1.63927619192751e-07	-2.89691784970313e-08	3.56824416882533e-07	0.0949270135630029	-179.001107381636	-171.067934684212	0.017562702744185	9.72509497348349e-08	ns	ns	0.323248469242502	ns	ns
IgG2	hivload	log10_cb_mot_ratio	RSV	other_antigens	8.00104848540592e-08	-1.42065054626432e-08	1.74227475170762e-07	0.0951677522710153	-322.990655644966	-315.028774594494	0.0173530664791223	4.75060221125838e-08	ns	ns	0.553683518459165	ns	ns
IgG3	hivload_cat>9999	log10_cb	Pneumo	other_antigens	-0.066544980423307	-0.144921169699054	0.0118312088524404	0.0952871697892086	-156.561143134807	-142.880150892835	0.00445645396989025	0.0395486740949538	ns	ns	0.470259170408245	ns	ns
IgG	haartno	log10_cb_mot_ratio	VSP5	other_antigens	0.0258787340180019	-0.00460953639212344	0.0563670044281273	0.0953557253813095	-331.040915738732	-322.966872092045	0.0166743300436121	0.0153796035967671	ns	ns	0.275873958984042	ns	ns
IgG2	log10_pf_exposure	log10_cb	HiB	vaccine_antigens	0.137954719398218	-0.0243716781496085	0.300281116946044	0.0954695562682764	-371.481717490326	-360.451456083521	0.00614022341353893	0.0824754702532507	ns	ns	0.285817363230879	ns	ns
IgG	hivload_cat>9999	log10_cb_mot_ratio	HepB	vaccine_antigens	-0.0181435368585731	-0.0395415521948221	0.00325447847767591	0.0956274367477601	-416.994033782271	-403.86916971585	0.0222873829898861	0.0107827494412343	ns	ns	0.620673217981292	ns	ns
IgG4	mat_anemiaabnormal	log10_cb_mot_ratio	VSP5	other_antigens	0.0498391927006484	-0.0088533076876105	0.108531693088907	0.0957413455185837	11.904328829944	22.9242986314585	0.00614579951993532	0.029820296961489	ns	ns	0.31480657159971	ns	ns
IgG4	gest_age	log10_cb_mot_ratio	Cp17	other_antigens	0.0181330156389846	-0.00322280092276551	0.0394888322007348	0.0957554681023388	-132.804198630365	-121.899829820857	0.00638827728287372	0.0108485892734705	ns	ns	0.294826979186005	ns	ns
IgG4	seasonrainy	log10_cb	Diphteria_toxin	vaccine_antigens	0.0389249025146707	-0.00694601031062322	0.0847958153399647	0.0959672255291002	-180.688056573087	-169.678413804145	0.00615410981616527	0.0233056056716277	ns	ns	0.469036786128057	ns	ns
IgG	gest_age	log10_cb	Pertussis_toxin	vaccine_antigens	-0.00702623472754019	-0.0153154370260923	0.00126296757101187	0.0963332445054068	-669.771679510864	-658.762036741923	0.00613304763037226	0.00421148976995896	ns	ns	0.860097827340785	ns	ns
IgG2	mat_anemia_recatabnormal	log10_cb_mot_ratio	Pertussis_toxin	vaccine_antigens	-0.0115685883518317	-0.0252650260778322	0.00212784937416887	0.0975028410580105	-880.251847472828	-869.304924758344	0.00619547854690883	0.0069581156883448	ns	ns	0.667499276831766	ns	ns
IgG3	treatmentmq_full	log10_cb	Rotavirus	other_antigens	0.0553806691007622	-0.0103393707380063	0.121100708939531	0.0980793163839682	-109.522525539928	-96.7953913387595	0.00438075645008595	0.0332993640370961	ns	ns	0.563787500102579	ns	ns
IgG	hivload_cat1000/9999	log10_cb	Tetanus_toxin	vaccine_antigens	-0.0287908564097042	-0.0630231748968384	0.00544146207743009	0.0983932615196123	-300.839276562169	-287.246782205694	0.0218035580417479	0.0172700920355415	ns	ns	0.275501132254914	ns	ns
IgG	haartno	log10_cb_mot_ratio	Pertussis_toxin	vaccine_antigens	0.0116373899745455	-0.00220569115234451	0.0254804711014354	0.0985264139228723	-498.670496675678	-490.624102994305	0.0163441994546256	0.00698229609908909	ns	ns	0.275873958984042	ns	ns
IgG2	cd4_cells	log10_cb_mot_ratio	HiB	vaccine_antigens	1.46632206920617e-05	-2.78833703121951e-06	3.21147784153428e-05	0.0986566560527996	-467.546514271612	-459.642327306923	0.0171341593859691	8.79734081751997e-06	ns	ns	0.84748213255106	ns	ns
IgG	motHIV+	log10_cb_mot_ratio	MSP1_42_3D7	exposure_antigen	-0.0063897130555387	-0.0139934886464623	0.00121406253538492	0.0992231165376029	-1168.60192348896	-1157.58195368744	0.00594906860534761	0.00386330186395029	ns	ns	0.138912363152644	ns	ns
IgG2	hemoglobin	log10_cb	Tetanus_toxin	vaccine_antigens	0.00677847905859223	-0.0012879872858629	0.0148449454030474	0.0992266771778272	-440.385589974622	-429.355328567817	0.00592834290473609	0.00409844372259258	ns	ns	0.50214154495553	ns	ns
IgG3	treatmentmq_split	log10_cb	Pneumo	other_antigens	-0.0388188397199736	-0.0850680906159064	0.00743041117595918	0.0994060700321509	-233.414745545711	-220.687611344543	0.00598032687511441	0.0234338056672657	ns	ns	0.471482968698219	ns	ns
IgG2	motHIV+	log10_cb	Shiga_toxin	other_antigens	-0.0241240579105887	-0.0528563038869046	0.00460818806572725	0.0995208850178208	-396.075499477805	-384.964152053837	0.00575329029505789	0.0146000411500265	ns	ns	0.267640140872099	ns	ns
IgG1	graviditymultigravidae	log10_cb_mot_ratio	HepB	vaccine_antigens	-0.0168359420355279	-0.0368891506851097	0.00321726661405378	0.099526189586011	-678.756990095871	-667.789014663411	0.00603682108532633	0.010187815510787	ns	ns	0.348341663551039	ns	ns
IgG4	mat_anemiaabnormal	log10_cb_mot_ratio	HiB	vaccine_antigens	0.070835679923693	-0.0135818354111363	0.155253195258522	0.0997101774581187	218.284614807966	229.273496248373	0.00598431464060445	0.0428886880092334	ns	ns	0.31480657159971	ns	ns
IgG4	haartno	log10_cb	VSP5	other_antigens	-0.122683394999996	-0.269098741841806	0.0237319518418129	0.0997115678785346	28.3805252648895	36.7430004932356	0.014519408594442	0.0739369785621976	ns	ns	0.139596195029948	ns	ns
IgG4	age_cat>30	log10_cb_mot_ratio	VSP5	other_antigens	0.0675069833842789	-0.0129562440570286	0.147970210825586	0.0997678080773672	10.9468463510667	25.6675367871349	0.00725828018808128	0.0408820907847774	ns	ns	0.196208218672522	ns	ns
IgG4	graviditymultigravidae	log10_cb	Measles	vaccine_antigens	0.0568638923737887	-0.0109414438233764	0.124669228570954	0.0999143602517422	37.5351950737415	48.6365257939135	0.00575156803928334	0.034454219419445	ns	ns	0.323039665247087	ns	ns
IgG2	hemoglobin	log10_cb_mot_ratio	OSP	other_antigens	-0.00592808173573011	-0.0130056660431342	0.001149502571674	0.100324779756586	-519.626583463931	-508.637702023523	0.00595019346444925	0.00359579767321181	ns	ns	0.455305986200962	ns	ns
IgG4	seasonrainy	log10_cb	Pneumo	other_antigens	0.0487022416624787	-0.00947522612740148	0.106879709452359	0.100507882741726	-48.0231459642802	-37.0342645238724	0.00594007194969481	0.0295573170486094	ns	ns	0.469036786128057	ns	ns
IgG4	treatmentmq	log10_cb	Pertussis_toxin	vaccine_antigens	0.0597286671457825	-0.0117252541589239	0.131182588450489	0.100544288355494	-42.3519127588661	-33.891068062051	0.0139349436674229	0.0360951332040554	ns	ns	0.964166868313074	ns	ns
IgG2	treatmentmq_split	log10_cb	Rotavirus	other_antigens	-0.0381271968061857	-0.0837125792092615	0.00745818559689019	0.100581282255334	-238.910885180811	-226.251741285117	0.0144801732291685	0.0230946284162456	ns	ns	0.387264898056113	ns	ns
IgG	age_cat>30	log10_cb_mot_ratio	VSP5	other_antigens	-0.0107709151051085	-0.0236467058881603	0.00210487567794335	0.100753935912024	-1050.87682676492	-1036.21112001247	0.00849522587449714	0.00654160184146802	ns	ns	0.37733901650542	ns	ns
IgG1	weight_g	log10_cb	VSP5	other_antigens	3.35332366615399e-05	-6.59127487384434e-06	7.36577481969242e-05	0.101092600382592	-222.386976674913	-211.255695622789	0.00563196430388202	2.03894761610591e-05	ns	ns	0.500077591226478	ns	ns
IgG1	hivload_cat1000/9999	log10_cb	HepB	vaccine_antigens	-0.102039269930647	-0.224473458536301	0.0203949186750062	0.101442066792754	-19.1998162867274	-5.60732193025192	9.64067810522717e-05	0.0617676452826636	ns	ns	0.164983005529127	ns	ns
IgG4	mat_anemiaabnormal	log10_cb_mot_ratio	Shiga_toxin	other_antigens	0.0454826229348106	-0.00903948512369342	0.100004730993315	0.101702102055623	-30.523169603918	-19.4929081971131	0.00579344928957559	0.027701819108003	ns	ns	0.31480657159971	ns	ns
IgG2	log10_pf_exposure	log10_cb	Shiga_toxin	other_antigens	-0.132450150077572	-0.291399779577725	0.0264994794225803	0.102077629725314	-388.225460137916	-377.205490336402	0.00579329199437095	0.0807586168975242	ns	ns	0.285817363230879	ns	ns
IgG4	hivload_cat>9999	log10_cb	MSP1_42_3D7	exposure_antigen	-0.065018240173151	-0.143190229456605	0.0131537491103029	0.102127568318265	-157.588874666946	-143.99638031047	0.00144324854938704	0.0394375113690884	ns	ns	0.731564863242292	ns	ns
IgG1	prematurityYes	log10_cb	Rotavirus	other_antigens	-0.0298866483374897	-0.0657677898327271	0.0059944931577476	0.102227731719673	-707.919718291844	-696.838521875436	0.00566746565819864	0.0182319342413926	ns	ns	0.286237648815085	ns	ns
IgG4	weight_g_catlow	log10_cb	Shiga_toxin	other_antigens	-0.0893047471273113	-0.196553208325233	0.0179437140706102	0.102333698122331	49.6533963907184	60.784677442843	0.0055674536282736	0.0544988551692869	ns	ns	0.179083971714079	ns	ns
IgG1	hivload_cat>9999	log10_cb	Cp17	other_antigens	-0.055026396710958	-0.121237745283942	0.0111849518620262	0.102414140658808	-195.01751466031	-181.336522418337	0.0978425600400855	0.0334102878731133	ns	ns	0.412017294010548	ns	ns
IgG3	haartno	log10_cb_mot_ratio	VSP5	other_antigens	-0.0663543175266017	-0.146236437873032	0.0135278028198287	0.102593618403093	-117.777181740434	-109.595018284297	0.0150321660210029	0.0403126062047734	ns	ns	0.359077664410827	ns	ns
IgG1	age	log10_cb_mot_ratio	Pneumo	other_antigens	-0.000699685614131323	-0.00154233353615438	0.00014296230789173	0.103288101995101	-963.848502225458	-952.828532423943	0.00572865915782361	0.000428129847978597	ns	ns	0.329610572442131	ns	ns
IgG4	age	log10_cb	Pertussis_toxin	vaccine_antigens	-0.00334821528854588	-0.00738112281218648	0.000684692235094709	0.103349878762355	-32.0314053137702	-20.9001242616456	0.00551526477223285	0.0020493426254052	ns	ns	0.920263800068556	ns	ns
IgG	haart_2no	log10_cb_mot_ratio	MSP1_42_3D7	exposure_antigen	0.019415168517708	-0.00403743626435909	0.0428677732997751	0.103368120332828	-292.030221529841	-284.846874065824	0.020990047659291	0.0117825628903099	ns	ns	0.395161943968003	ns	ns
IgG4	malaria_placentariaYes	log10_cb_mot_ratio	Tetanus_toxin	vaccine_antigens	0.0608390545586134	-0.0125604001472741	0.134238509264501	0.103892789728743	-275.619002199377	-264.619722135039	0.00573641634702415	0.0372914662355237	ns	ns	0.863571561822308	ns	ns
IgG4	age	log10_cb_mot_ratio	Pertussis_toxin	vaccine_antigens	0.00259705313896136	-0.00053626535721505	0.00573037163513778	0.103907092232792	-193.291775169223	-182.261513762418	0.00567626657145259	0.00159198947508965	ns	ns	0.217953258417606	ns	ns
IgG3	hivload_cat1000/9999	log10_cb	Pneumo	other_antigens	-0.0544275566878326	-0.120214340108873	0.0113592267332076	0.103949572854272	-156.561143134807	-142.880150892835	0.00445645396989025	0.0331960520320822	ns	ns	0.982726206867609	ns	ns
IgG4	age_cat>30	log10_cb_mot_ratio	RSV	other_antigens	0.0285223161813111	-0.00590517320905037	0.0629498055716726	0.104051711538869	-483.864830962596	-469.268934009951	0.00264657962185599	0.0174897140907427	ns	ns	0.196208218672522	ns	ns
IgG2	weight_g_catlow	log10_cb	Rotavirus	other_antigens	0.0408990443470803	-0.00846570222435808	0.0902637909185188	0.104058307513974	-415.090774172581	-403.989443452409	0.00553460818660012	0.0250839226725749	ns	ns	0.132437845926875	ns	ns
IgG2	seasonrainy	log10_cb	RSV	other_antigens	0.0156220301351902	-0.00323724797337763	0.0344813082437581	0.104116374261364	-697.932147562716	-686.901886155911	0.0056652853950534	0.00958210034928357	ns	ns	0.791506185247737	ns	ns
IgG	hemoglobin	log10_cb_mot_ratio	Cp17	other_antigens	0.00170558676800067	-0.000353874895946436	0.00376504843194777	0.104183320727788	-1224.28367649307	-1213.30522984579	0.00576120422029791	0.00104630290826214	ns	ns	0.224142079941063	ns	ns
IgG3	haart_2no	log10_cb	Pertussis_toxin	vaccine_antigens	-0.0675764731317424	-0.149432816633767	0.0142798703702821	0.10440673838855	-85.0610095298508	-77.6632851738871	0.0193198471857952	0.0411696749689465	ns	ns	0.371745959110723	ns	ns
IgG4	hivload_cat>9999	log10_cb	Pneumo	other_antigens	-0.14342176488355	-0.317064359903266	0.0302208301361657	0.10450926617747	21.3431452853333	34.980084378895	0.038287180797154	0.0876112226456362	ns	ns	0.731564863242292	ns	ns
IgG1	log10_pf_exposure	log10_cb_mot_ratio	OSP	other_antigens	0.0391395845826938	-0.00822660484621795	0.0865057740116056	0.104965329112074	-1098.10290796834	-1087.05216866632	0.00558244753690917	0.0240667009973132	ns	ns	0.36737865189226	ns	ns
IgG2	age_cat>30	log10_cb_mot_ratio	VSP5	other_antigens	-0.0255987333062167	-0.056595986758619	0.00539852014618563	0.10515636874965	-545.024710406295	-530.386781543257	0.00987809211172785	0.0157478189666554	ns	ns	0.4907297208317	ns	ns
IgG	age_cat>30	log10_cb_mot_ratio	RSV	other_antigens	-0.00493820438242527	-0.010925941959824	0.00104953319497345	0.10562646906325	-1485.35937922657	-1470.72145036353	0.00798915131085665	0.00304200523873855	ns	ns	0.37733901650542	ns	ns
IgG2	age	log10_cb_mot_ratio	MSP1_42_3D7	exposure_antigen	-0.00107892148633839	-0.00238720497609014	0.000229362003413358	0.105645041807358	-701.537764953453	-690.538484889115	0.00564424639176464	0.000664688992310144	ns	ns	0.369757646325752	ns	ns
IgG2	treatmentmq_split	log10_cb_mot_ratio	Diphteria_toxin	vaccine_antigens	0.0208288449079767	-0.00444965357734996	0.0461073433933033	0.105647687282538	-419.292930359632	-406.917929556405	0.0189958914934074	0.0127998777241922	ns	ns	0.369766905488883	ns	ns
IgG1	treatmentmq_full	log10_cb	Diphteria_toxin	vaccine_antigens	0.0333751606657421	-0.00716744579919877	0.073917767130683	0.10601514181075	-283.050918930741	-270.391775035047	0.00368392711961973	0.0205398393514565	ns	ns	0.371052996337623	ns	ns
IgG	log10_pf_exposure	log10_cb_mot_ratio	RSV	other_antigens	-0.0196652361282327	-0.0435373997566804	0.00420692750021503	0.106026838220053	-1485.67865529406	-1474.70020864678	0.00566389605333684	0.012128176342493	ns	ns	0.371093933770186	ns	ns
IgG1	hivload_cat1000/9999	log10_cb	MSP1_42_3D7	exposure_antigen	-0.0570964902992176	-0.126534655018679	0.0123416744202442	0.106060503554439	-144.245111643834	-130.564119401861	-0.00121749294981743	0.0350385413174393	ns	ns	0.164983005529127	ns	ns
IgG3	haart_2no	log10_cb_mot_ratio	OSP	other_antigens	-0.143575621416512	-0.318638881487924	0.0314876386549001	0.106584190755502	39.0854794265603	46.3056371683531	0.0201275730103683	0.0879686839131288	ns	ns	0.270896417234588	ns	ns
IgG4	prematurityYes	log10_cb	VSP5	other_antigens	-0.112467567955292	-0.249293135539663	0.0243579996290795	0.106799537440916	87.146332105396	98.2275285218041	0.00543282268153922	0.0695238402900476	ns	ns	0.135926684015712	ns	ns
IgG1	haartno	log10_cb	VSP5	other_antigens	-0.0930778022484895	-0.206644015501164	0.0204884110041853	0.107255380600011	-32.5942061003683	-24.2317308720221	0.013546491226597	0.0573487879226556	ns	ns	0.490610682880025	ns	ns
IgG1	gest_age	log10_cb	Shiga_toxin	other_antigens	0.00435951563834395	-0.000957384436394267	0.00967641571308217	0.107666794270973	-941.692933448655	-930.632007379635	0.00542637872087881	0.00270154858118538	ns	ns	0.301467023958725	ns	ns
IgG	haart_2no	log10_cb_mot_ratio	Pneumo	other_antigens	-0.0179339106285899	-0.0398745458678401	0.00400672461066023	0.107691245205238	-295.698506643296	-288.590163085895	0.0207050716234897	0.0110184993389409	ns	ns	0.395161943968003	ns	ns
IgG4	age_cat>30	log10_cb_mot_ratio	OSP	other_antigens	0.094909162628093	-0.0210305976697019	0.210848922925888	0.108227498702713	216.96264150464	231.642165196562	0.0117029598164835	0.0589045746160445	ns	ns	0.196208218672522	ns	ns
IgG3	haart_2no	log10_cb_mot_ratio	Pneumo	other_antigens	-0.0285410602532803	-0.0635327560438727	0.00645063553731214	0.10848093426063	-224.960526993632	-217.740369251839	0.0197831738748804	0.017583206352557	ns	ns	0.270896417234588	ns	ns
IgG3	hivload	log10_cb_mot_ratio	MSP1_42_3D7	exposure_antigen	-6.44627917870802e-08	-1.43420841024541e-07	1.44952574503801e-08	0.108488864060329	-365.916065266365	-357.897578762979	0.0150578575606066	3.98211826794823e-08	ns	ns	0.22944152470847	ns	ns
IgG4	gest_age	log10_cb_mot_ratio	Pneumo	other_antigens	0.00818914688458971	-0.00182267864487824	0.0182009724140577	0.108492494126549	-566.929455904137	-556.068253306986	0.00575914013873047	0.00508560514199724	ns	ns	0.294826979186005	ns	ns
IgG	seasonrainy	log10_cb_mot_ratio	MSP1_42_3D7	exposure_antigen	0.00694394459574387	-0.00156146241455932	0.0154493516060471	0.109162873877157	-1134.93478933204	-1123.99844863911	0.00558095486213672	0.0043208825119048	ns	ns	0.890307889884752	ns	ns
IgG3	treatmentmq_split	log10_cb	Measles	vaccine_antigens	0.0409415242620222	-0.00927720909861351	0.0911602576226579	0.109415516395351	-204.100685741888	-191.373551540719	0.00332967899744263	0.025445083231237	ns	ns	0.471482968698219	ns	ns
IgG4	log10_pf_exposure	log10_cb	HepB	vaccine_antigens	-0.123117950672939	-0.274046690442634	0.0278107890967556	0.109467982414	-417.150718413653	-406.130748612138	0.00541106529707802	0.0766833890221506	ns	ns	0.510850584598665	ns	ns
IgG3	age	log10_cb_mot_ratio	HiB	vaccine_antigens	0.00452642173736846	-0.00102342993717444	0.0100762734119114	0.109533673108116	142.283129599198	153.333868901214	0.00535216945232053	0.00281987262308955	ns	ns	0.450435546295748	ns	ns
IgG1	age_catbetween_20_30	log10_cb	Rotavirus	other_antigens	-0.0159076471013733	-0.0354322800669771	0.00361698586423054	0.109910958025715	-721.412367237713	-706.557436015676	0.00230259104826769	0.00992154229851597	ns	ns	0.256458902060002	ns	ns
IgG	weight_g_catlow	log10_cb	Measles	vaccine_antigens	0.030960690886386	-0.00708672466514759	0.0690081064379197	0.110344286048148	-568.989083937308	-557.897803477792	0.00524052986686996	0.0193329309738542	ns	ns	0.772410002337035	ns	ns
IgG2	treatmentmq_split	log10_cb	Shiga_toxin	other_antigens	-0.0385469189082009	-0.0859936740322637	0.00889983621586185	0.110647113730318	-224.314363621726	-211.587229420558	0.00566381162560714	0.0240405632000714	ns	ns	0.387264898056113	ns	ns
IgG4	weight_g_catlow	log10_cb_mot_ratio	OSP	other_antigens	-0.117332888989465	-0.261669359092694	0.0270035811137648	0.11069299076766	218.071273004658	229.070553068996	0.00538777098753895	0.0733318608833959	ns	ns	0.311787581523138	ns	ns
IgG3	weight_g_catlow	log10_cb	Shiga_toxin	other_antigens	-0.0494500462440506	-0.110430219752228	0.0115301272641264	0.111583612600211	-291.364655110323	-280.233374058198	0.00511199258482342	0.030987387670645	ns	ns	0.369337743586793	ns	ns
IgG	hemoglobin	log10_cb_mot_ratio	Rotavirus	other_antigens	0.00153801118152088	-0.000361308570801338	0.0034373309338431	0.112071039970531	-1273.10388437594	-1262.11500293553	0.00533860029796918	0.00096495771006794	ns	ns	0.224142079941063	ns	ns
IgG4	haartno	log10_cb_mot_ratio	VSP5	other_antigens	-0.116350199677592	-0.260367573145042	0.0276671737898569	0.112244038206369	15.423125181718	23.605288637855	0.0137619173571238	0.072678537300475	ns	ns	0.443832254452778	ns	ns
IgG2	gest_age	log10_cb	Diphteria_toxin	vaccine_antigens	-0.0133819560721158	-0.0299215956288342	0.00315768348460261	0.11236787101219	-273.526820541095	-262.579897826612	0.00539968794741386	0.00840252975127249	ns	ns	0.524383398056886	ns	ns
IgG4	mat_anemiaabnormal	log10_cb_mot_ratio	OSP	other_antigens	0.0682877326596141	-0.0161270538169347	0.152702519136163	0.112430918428468	218.265994883309	229.254876323717	0.00532098425775351	0.0428873016008447	ns	ns	0.31480657159971	ns	ns
IgG	age_cat>30	log10_cb_mot_ratio	MSP1_42_3D7	exposure_antigen	-0.00855911974503676	-0.0191523671917535	0.00203412770167997	0.112865989655073	-1169.16450067692	-1154.47120760823	0.0112430531258456	0.00538210453137141	ns	ns	0.37733901650542	ns	ns
IgG	age	log10_cb_mot_ratio	VSP5	other_antigens	-0.000578578564309862	-0.00129535680771941	0.00013819967909968	0.113213423301429	-1050.92793949386	-1039.92865942953	0.00526446025131311	0.000364167714454709	ns	ns	0.604611729121292	ns	ns
IgG2	hivload	log10_cb	Diphteria_toxin	vaccine_antigens	-2.0280036163679e-07	-4.54718530078948e-07	4.91178068053673e-08	0.113478243721874	-121.062116042452	-112.960674945075	0.0139873975581654	1.27091887044e-07	ns	ns	0.592216253839053	ns	ns
IgG4	log10_pf_exposure	log10_cb_mot_ratio	Tetanus_toxin	vaccine_antigens	0.154935196969975	-0.0371863126073979	0.347056706547348	0.113547066109077	-275.477175739667	-264.477895675329	0.00524836274593621	0.0976096187121643	ns	ns	0.400358916143562	ns	ns
IgG1	hivload_cat400/999	log10_cb_mot_ratio	HiB	vaccine_antigens	-0.0152221898744614	-0.0341738970399606	0.00372951729103779	0.114229794010429	-432.371146836778	-419.007002664469	0.0156369292111473	0.00955581595898009	ns	ns	0.602002076707308	ns	ns
IgG2	hemoglobin	log10_cb	Diphteria_toxin	vaccine_antigens	0.00853055801715422	-0.00207243401110023	0.0191335500454087	0.114393945681816	-277.628694616064	-266.650247968785	0.00524433297638116	0.00538681617126128	ns	ns	0.50214154495553	ns	ns
IgG3	motHIV+	log10_cb	Shiga_toxin	other_antigens	0.0273836900589386	-0.00665551083051892	0.0614228909483962	0.114447021343941	-292.993131522402	-281.851933105874	0.00496276464481415	0.0172974271242609	ns	ns	0.371988124104448	ns	ns
IgG2	motHIV+	log10_cb	Tetanus_toxin	vaccine_antigens	-0.0211369428524642	-0.0474306922719063	0.00515680656697795	0.114702917516614	-444.413934221004	-433.363194918988	0.00510394615669774	0.0133598208554589	ns	ns	0.267640140872099	ns	ns
IgG3	hivload	log10_cb_mot_ratio	Measles	vaccine_antigens	7.26893200393824e-08	-1.79276847529753e-08	1.6330632483174e-07	0.114720762354235	-336.442873068139	-328.424386564753	0.0142267607999171	4.57011835595353e-08	ns	ns	0.22944152470847	ns	ns
IgG4	graviditymultigravidae	log10_cb_mot_ratio	Measles	vaccine_antigens	0.0492366698136802	-0.0120286993992766	0.110502039026637	0.11479059156947	-33.8812167648089	-22.8923353244011	0.00520698847885237	0.0311261388767847	ns	ns	0.160706828197257	ns	ns
IgG3	weight_g	log10_cb_mot_ratio	VSP5	other_antigens	2.73943256170027e-05	-6.70519769059069e-06	6.14938489245962e-05	0.114932231585765	-318.281660949429	-307.241143122378	0.0051107480557786	1.73256769202307e-05	ns	ns	0.477750550439216	ns	ns
IgG4	age_cat>30	log10_cb_mot_ratio	Shiga_toxin	other_antigens	0.0599940074231932	-0.0146948038236573	0.134682818670044	0.114982165968248	-32.8126321763897	-18.0783131070349	0.0100888126698391	0.0379487478914657	ns	ns	0.196208218672522	ns	ns
IgG	log10_pf_exposure	log10_cb	RSV	other_antigens	0.0410195380219521	-0.0100760050921036	0.0921150811360079	0.11517995694255	-1047.00824716865	-1036.00896710432	0.00517032078388746	0.0259596985898414	ns	ns	0.403129849298924	ns	ns
IgG3	log10_pf_exposure	log10_cb	Tetanus_toxin	vaccine_antigens	-0.288867974346925	-0.648726706307901	0.0709907576140499	0.115221008299018	94.2451809002285	105.295920202245	0.00507974664080602	0.182843766994917	ns	ns	0.537698038728751	ns	ns
IgG4	gest_age	log10_cb	RSV	other_antigens	0.0213251666113602	-0.00524473149592449	0.0478950647186449	0.11526762859759	-1.10044586479268	9.89883419954461	0.00516616503174816	0.0134991528495597	ns	ns	0.134478900030521	ns	ns
IgG4	gest_age	log10_cb_mot_ratio	Measles	vaccine_antigens	0.0205953974450629	-0.00509192579484114	0.046282720684967	0.115631566212992	-33.9052262920763	-22.9901622840751	0.0052968177426671	0.0130491655783875	ns	ns	0.294826979186005	ns	ns
IgG3	haart_2no	log10_cb_mot_ratio	VSP5	other_antigens	-0.0715135399558624	-0.161100421706392	0.0180733417946671	0.116098464529109	-70.784433671068	-63.5642759292752	0.0184626683836975	0.0450170988490699	ns	ns	0.270896417234588	ns	ns
IgG	graviditymultigravidae	log10_cb	Measles	vaccine_antigens	0.0195193345343461	-0.00485793487649512	0.0438966039451873	0.116136189483126	-571.470548067017	-560.369217346845	0.00495236282541656	0.0123869275817139	ns	ns	0.270984442127295	ns	ns
IgG	log10_mother	log10_cb_mot_ratio	OSP	other_antigens	-0.0223080363792572	-0.0501793922836336	0.00556331952511929	0.116270833240158	-1661.06466933477	-1650.05502656583	0.00510105669722216	0.0141605821692481	ns	ns	0.121220825198748	ns	ns
IgG1	weight_g	log10_cb	Pertussis_toxin	vaccine_antigens	-1.82759997923634e-05	-4.11318776073285e-05	4.57987802260168e-06	0.116640154999043	-562.305546280814	-551.17426522869	0.00488016148872916	1.16143314402057e-05	ns	ns	0.500077591226478	ns	ns
IgG1	mat_anemia_recatabnormal	log10_cb	Cp17	other_antigens	-0.0213191112156253	-0.0480246769569536	0.00538645452570294	0.117239643853856	-519.731253943026	-508.60992314878	0.00486966685241019	0.0135703862597933	ns	ns	0.50110724286481	ns	ns
IgG2	hivload_cat400/999	log10_cb	Pneumo	other_antigens	-0.0422755824662629	-0.0953789481417747	0.0108277832092489	0.117477289960649	-214.303918735285	-200.756267728723	0.0204032378727519	0.0267876367782512	ns	ns	0.917741209367606	ns	ns
IgG1	hivload_cat>9999	log10_cb	Rotavirus	other_antigens	-0.0385868406606869	-0.0870846406403402	0.00991095931896646	0.117719226860157	-266.001539248293	-252.320547006321	0.0261935701015185	0.0244720201816584	ns	ns	0.412017294010548	ns	ns
IgG3	hemoglobin	log10_cb	RSV	other_antigens	-0.0159557591785785	-0.0359810329157069	0.00406951455854997	0.117936662382867	101.261218506461	112.382549300708	0.00483864899032038	0.0101758076276354	ns	ns	0.715793503968716	ns	ns
IgG2	treatmentmq_full	log10_cb_mot_ratio	Pertussis_toxin	vaccine_antigens	0.0147585548863527	-0.00381805187809789	0.0333351616508033	0.118657594977848	-545.418011306627	-532.874817558426	0.00510246980017204	0.00940935016965183	ns	ns	0.553735443229956	ns	ns
IgG1	treatmentmq	log10_cb_mot_ratio	Pneumo	other_antigens	-0.0131860749775336	-0.0298028663193981	0.00343071636433092	0.118712979762639	-383.483174583932	-375.248378198842	0.0127445798559584	0.00838731883389653	ns	ns	0.408351592353441	ns	ns
IgG	hivload	log10_cb	Tetanus_toxin	vaccine_antigens	-8.97083879186164e-08	-2.02768311385783e-07	2.33515355485504e-08	0.118718443091847	-301.791251739537	-293.635755125651	0.0130929315385638	5.70501080458503e-08	ns	ns	0.677729891377305	ns	ns
IgG2	cd4_cells_cat<350	log10_cb	RSV	other_antigens	-0.0223157959725057	-0.0504657500557109	0.00583415811069938	0.119012339219501	-268.853910179351	-260.779866532663	0.0134256570666	0.014200055603125	ns	ns	0.333234549814603	ns	ns
IgG2	hivload_cat>9999	log10_cb	VSP5	other_antigens	-0.111602101162628	-0.252418065297971	0.0292138629727157	0.119130796184198	-26.014096177374	-12.3771570838123	-0.00476228997036854	0.0710485741388553	ns	ns	0.719251964778656	ns	ns
IgG2	cd4_cells_cat<350	log10_cb_mot_ratio	HiB	vaccine_antigens	-0.0081454610551633	-0.0184357603732459	0.00214483826291926	0.119483244427465	-467.235941643709	-459.33175467902	0.014166082715506	0.00518734611837533	ns	ns	0.836382710992254	ns	ns
IgG2	hivload_cat>9999	log10_cb	Pneumo	other_antigens	-0.0482754071259191	-0.109286529298918	0.0127357150470798	0.119700241072774	-214.303918735285	-200.756267728723	0.0204032378727519	0.030776651525074	ns	ns	0.719251964778656	ns	ns
IgG3	motHIV+	log10_cb_mot_ratio	VSP5	other_antigens	0.0258567771010945	-0.0067877127746096	0.0585012669767985	0.120104771051174	-320.245162308417	-309.194423006401	0.00485734333600119	0.0165866240565436	ns	ns	0.240209542102349	ns	ns
IgG1	age_catbetween_20_30	log10_cb_mot_ratio	Rotavirus	other_antigens	-0.00927184720898768	-0.0209886703932718	0.00244497597529643	0.120450227630442	-1009.1547521859	-994.42043311655	0.00349551460301645	0.00595321791425658	ns	ns	0.209376929063053	ns	ns
IgG1	treatmentmq	log10_cb_mot_ratio	Measles	vaccine_antigens	-0.012550918525971	-0.0284419423958097	0.0033401053438676	0.12045605410967	-398.389916473853	-390.10339466946	0.0123250880024848	0.0080224976632422	ns	ns	0.408351592353441	ns	ns
IgG1	motHIV+	log10_cb	Rotavirus	other_antigens	-0.0132395168571401	-0.0299781033487411	0.00349906963446089	0.120638250332023	-723.129631917878	-711.98843350135	0.00468888898862274	0.00850591296023282	ns	ns	0.211116938081041	ns	ns
IgG3	treatmentmq_split	log10_cb	VSP5	other_antigens	0.0551820557386042	-0.0146465642654002	0.125010675742609	0.12064993437311	-86.7432128107966	-74.0160786096283	0.00922171025053231	0.0353811203314232	ns	ns	0.471482968698219	ns	ns
IgG1	seasonrainy	log10_cb_mot_ratio	Diphteria_toxin	vaccine_antigens	0.00903967498358776	-0.0023936053166324	0.0204729552838079	0.1207458166159	-955.299891592982	-944.406256247518	0.00509085075091109	0.00580792609368304	ns	ns	0.55068594773753	ns	ns
IgG3	hivload_cat>9999	log10_cb	HepB	vaccine_antigens	0.085761082579308	-0.0229472549697973	0.194469420128413	0.120811749405126	-84.4995797110921	-70.8626406175304	0.0199012497919794	0.0548486986350916	ns	ns	0.470259170408245	ns	ns
IgG4	age	log10_cb_mot_ratio	VSP5	other_antigens	0.00350656551746384	-0.000930539121053872	0.00794367015598155	0.120939159832088	10.6692240428585	21.7097418699097	0.00483693586487521	0.00225445501788278	ns	ns	0.217953258417606	ns	ns
IgG	haartno	log10_cb_mot_ratio	Diphteria_toxin	vaccine_antigens	0.0178798065704609	-0.00479666286543887	0.0405562760063607	0.120967949081346	-388.558910672845	-380.54042416946	0.0134415261595957	0.0114365012896525	ns	ns	0.282258547856474	ns	ns
IgG3	prematurityYes	log10_cb_mot_ratio	Pertussis_toxin	vaccine_antigens	-0.055958779069911	-0.126779583237375	0.0148620250975531	0.120994980011374	-311.721556146941	-300.732674706533	0.00491912792504645	0.0359808194123453	ns	ns	0.564643240053079	ns	ns
IgG2	age_catbetween_20_30	log10_cb_mot_ratio	Cp17	other_antigens	0.0123236370624114	-0.00328007581133057	0.0279273499361533	0.121160852595272	-826.279129006345	-811.627287085801	0.00182038810475948	0.00792741639492004	ns	ns	0.268430890198715	ns	ns
IgG	log10_mother	log10_cb_mot_ratio	Diphteria_toxin	vaccine_antigens	-0.0308271295270463	-0.069866273983696	0.00821201492960327	0.121220825198748	-1204.77924560873	-1193.8429049158	0.004996461755852	0.019832508468804	ns	ns	0.121220825198748	ns	ns
IgG4	haart_2no	log10_cb	VSP5	other_antigens	-0.122883149402007	-0.278997145706456	0.0332308469024418	0.121289141318592	27.2769894096554	34.6747137656191	0.0165735900462981	0.0785175859437029	ns	ns	0.169804797846028	ns	ns
IgG1	malaria_placentariaYes	log10_cb	Diphteria_toxin	vaccine_antigens	-0.0408022298800138	-0.0924885265776939	0.0108840668176664	0.121352696477416	-463.188822871004	-452.087492150832	0.0047211283743801	0.0262635820021915	ns	ns	0.696621081364725	ns	ns
IgG3	treatmentmq_split	log10_cb_mot_ratio	Cp17	other_antigens	0.00301040216239502	-0.000807151595450587	0.00682795592024063	0.121427733808585	-1110.88443810837	-1098.20250212822	0.00399859812355086	0.00193414185650582	ns	ns	0.583051034366799	ns	ns
IgG	motHIV+	log10_cb_mot_ratio	Tetanus_toxin	vaccine_antigens	-0.00571527908531679	-0.0129701491735517	0.00153959100291817	0.122106924675813	-1189.03837827478	-1178.03909821044	0.00485226126175597	0.00368592306336063	ns	ns	0.155408813223762	ns	ns
IgG2	prematurityYes	log10_cb	Pertussis_toxin	vaccine_antigens	0.0539719433713252	-0.0146896604161163	0.122633547158767	0.122929622282911	-317.276650622285	-306.24638921548	0.0047659033568852	0.0348858728232612	ns	ns	0.573671570653583	ns	ns
IgG3	age_cat>30	log10_cb_mot_ratio	Measles	vaccine_antigens	-0.0144633986604821	-0.0328793283600514	0.00395253103908724	0.123253938834063	-853.159520323101	-838.438829887033	0.00351914923144392	0.00935684204828906	ns	ns	0.599614569451604	ns	ns
IgG4	prematurityYes	log10_cb_mot_ratio	Rotavirus	other_antigens	-0.0893671897458399	-0.203224040788876	0.0244896612971962	0.123467322418175	-38.163756649648	-27.1853100023691	0.00482582616140903	0.0578446088399525	ns	ns	0.55829503087394	ns	ns
IgG3	age_catbetween_20_30	log10_cb	HepB	vaccine_antigens	0.0287075116801643	-0.00787223229952762	0.0652872556598562	0.123542030385679	-338.97472493985	-324.159595041225	0.00930805422443348	0.0185874238823717	ns	ns	0.419846895929303	ns	ns
IgG3	mat_anemia_recatabnormal	log10_cb_mot_ratio	Rotavirus	other_antigens	-0.0106491075326684	-0.0242278442334534	0.00292962916811662	0.123790036702489	-904.729077687247	-893.698816280442	0.00472846018296891	0.00689914093924468	ns	ns	0.837740230813295	ns	ns
IgG	mat_anemiaabnormal	log10_cb	Shiga_toxin	other_antigens	-0.0103423286543312	-0.0235417029894551	0.00285704568079259	0.124136575646918	-868.674866766888	-857.573536046716	0.00460216745304465	0.00670705530047592	ns	ns	0.34758241181137	ns	ns
IgG4	gest_age	log10_cb_mot_ratio	Rotavirus	other_antigens	0.0198453670559864	-0.00548611689694477	0.0451768510089176	0.124170734327804	-36.2451521892125	-25.2876846484066	0.00482875770461999	0.0128691915178536	ns	ns	0.294826979186005	ns	ns
IgG1	cd4_cells_cat<350	log10_cb_mot_ratio	Measles	vaccine_antigens	-0.0138322282156595	-0.0315356667052209	0.00387121027390185	0.124281755953998	-355.469148558217	-347.564961593528	0.0135619822212187	0.00892431406434877	ns	ns	0.608544716357413	ns	ns
IgG3	gest_age	log10_cb_mot_ratio	Shiga_toxin	other_antigens	0.00884253697281077	-0.00244892088538202	0.0201339948310036	0.124320575445283	-494.338239004166	-483.370263571706	0.00480511714047693	0.00573650289673188	ns	ns	0.283644375147095	ns	ns
IgG	hivload	log10_cb_mot_ratio	Measles	vaccine_antigens	-6.43680689831304e-08	-1.46816808190525e-07	1.80806702242643e-08	0.124580038946851	-343.994990347424	-336.090803382735	0.0135252760660793	4.15624593680053e-08	ns	ns	0.436030136313979	ns	ns
IgG4	prematurityYes	log10_cb_mot_ratio	MSP1_42_3D7	exposure_antigen	0.0111906342577788	-0.0031181436385812	0.0254994121541387	0.124806408585353	-1254.06310456608	-1243.15873575657	0.00488720981382895	0.00726874825666703	ns	ns	0.55829503087394	ns	ns
IgG4	age_cat>30	log10_cb_mot_ratio	Measles	vaccine_antigens	0.0589569422854219	-0.0166914976683294	0.134605382239173	0.126133854860907	-32.0869825008553	-17.4351405803115	0.00242946994585669	0.0384329478497818	ns	ns	0.196208218672522	ns	ns
IgG2	age_catbetween_20_30	log10_cb	Cp17	other_antigens	-0.0216698390258485	-0.0494734667699177	0.00613378871822077	0.126134095359448	-500.91495008607	-486.126576140048	0.00254229964342123	0.0141275860125385	ns	ns	0.617661911815008	ns	ns
IgG2	prematurityYes	log10_cb_mot_ratio	Tetanus_toxin	vaccine_antigens	0.0324580215863232	-0.00921898659018196	0.0741350297628283	0.126386481364295	-596.226936852435	-585.344073511363	0.00485187613572313	0.0211709263285648	ns	ns	0.449004185862147	ns	ns
IgG2	hivload	log10_cb	HepB	vaccine_antigens	-2.36142370189057e-07	-5.40478559152841e-07	6.81938187747275e-08	0.126903482965511	-82.6277778733306	-74.665896822858	0.0129840936122507	1.53452171142109e-07	ns	ns	0.592216253839053	ns	ns
IgG3	motHIV+	log10_cb	Cp17	other_antigens	0.0186685964558076	-0.00535029058814741	0.0426874834997627	0.127184509112028	-504.288573667938	-493.14737525141	0.0044156713785507	0.0122054847761523	ns	ns	0.371988124104448	ns	ns
IgG	seasonrainy	log10_cb_mot_ratio	HepB	vaccine_antigens	-0.00570015396872914	-0.0130349304582471	0.0016346225207888	0.127186841412107	-1189.46630153884	-1178.61598824584	0.00486941617773196	0.00372571123672514	ns	ns	0.890307889884752	ns	ns
IgG4	weight_g_catlow	log10_cb_mot_ratio	Shiga_toxin	other_antigens	-0.0728217893777078	-0.166629925371864	0.020986346616448	0.127637539691751	-31.057771164662	-20.0172533376108	0.00454875693265255	0.0476631137058118	ns	ns	0.311787581523138	ns	ns
IgG	haartno	log10_cb	RSV	other_antigens	-0.0188462431407723	-0.0431850984414419	0.00549261215989729	0.127827012042404	-392.605817118912	-384.319295314519	0.0115252981395724	0.0122873397821908	ns	ns	0.449298694088973	ns	ns
IgG3	weight_g	log10_cb	Cp17	other_antigens	-1.95987426573915e-05	-4.48710264391024e-05	5.67354112431942e-06	0.128034642676665	-501.603562298291	-490.472281246166	0.0043959675627141	1.2842240515459e-05	ns	ns	0.448121249368326	ns	ns
IgG4	weight_g	log10_cb	VSP5	other_antigens	5.22063118224591e-05	-1.51143702356075e-05	0.000119526993880526	0.128042704271317	90.170999527092	101.302280579217	0.00439564208575427	3.42093495832021e-05	ns	ns	0.585136030903845	ns	ns
IgG3	haartno	log10_cb	OSP	other_antigens	-0.132751445279925	-0.304402537258111	0.0388996466982607	0.128321962816892	66.5444750292536	74.9069502575998	0.011180298509095	0.0866805521519611	ns	ns	0.308663759991745	ns	ns
IgG	haartno	log10_cb	HepB	vaccine_antigens	-0.0399586273053697	-0.0916404161894401	0.0117231615787007	0.128371055453992	-219.757276538557	-211.522480153467	0.0116722967394632	0.0260863624245396	ns	ns	0.449298694088973	ns	ns
IgG1	hivload_cat400/999	log10_cb_mot_ratio	Measles	vaccine_antigens	-0.0205089785985469	-0.0470880195621179	0.00607006236502415	0.129000445008709	-359.990150221856	-346.626006049547	0.0312906203088961	0.0134016646414021	ns	ns	0.602002076707308	ns	ns
IgG1	mat_anemia_recatabnormal	log10_cb_mot_ratio	Cp17	other_antigens	-0.00922021387232928	-0.0211413811632746	0.00270095341861602	0.129033819749807	-980.411342560106	-969.391372758592	0.00452193663176748	0.00605686836294151	ns	ns	0.513069676677885	ns	ns
IgG	age	log10_cb_mot_ratio	OSP	other_antigens	0.00019255343971162	-5.67507998790784e-05	0.000441857679302318	0.129559656240277	-1660.89412393714	-1649.8844811682	0.00451579691212778	0.000126663847355616	ns	ns	0.604611729121292	ns	ns
IgG3	cd4_cells_cat<350	log10_cb_mot_ratio	RSV	other_antigens	0.0227479341989785	-0.00678594340497878	0.0522818118029359	0.129654995231378	-250.04265145712	-242.138464492431	0.0129151235270882	0.0148880455868029	ns	ns	0.83290905746926	ns	ns
IgG4	hemoglobin	log10_cb_mot_ratio	Cp17	other_antigens	-0.0106527024681723	-0.0244507123131123	0.00314530737676759	0.129709179097045	-131.861126889378	-120.893151456918	0.0045732471754133	0.00700992949171767	ns	ns	0.315272614746298	ns	ns
IgG4	motHIV+	log10_cb_mot_ratio	Pneumo	other_antigens	0.0160445738432667	-0.00475376339704614	0.0368429110835796	0.130008019543874	-575.173645794199	-564.226723079715	0.00459311786494587	0.010566049328913	ns	ns	0.260016039087749	ns	ns
IgG2	mat_anemia_recatabnormal	log10_cb_mot_ratio	RSV	other_antigens	0.0108587357266241	-0.00322788865683171	0.0249453601100799	0.130294419089601	-864.207977318745	-853.271636625816	0.00459737856748721	0.00715623001656639	ns	ns	0.667499276831766	ns	ns
IgG4	graviditymultigravidae	log10_cb	OSP	other_antigens	0.0787382862752447	-0.0234198147324676	0.180896387282957	0.130378644891601	285.169597925679	296.290928719926	0.00431669506095045	0.0519114593440805	ns	ns	0.323039665247087	ns	ns
IgG4	weight_g_catlow	log10_cb_mot_ratio	Cp17	other_antigens	-0.0605073046925357	-0.139022533443427	0.018007924058356	0.130406289264755	-133.099322113872	-122.120875466593	0.00452805358514563	0.039889410724683	ns	ns	0.311787581523138	ns	ns
IgG4	motHIV+	log10_cb	Pertussis_toxin	vaccine_antigens	-0.0403961979096388	-0.092839758745721	0.0120473629264435	0.130613944726146	-31.6604544409326	-20.529173388808	0.00429297457702438	0.0266494641941093	ns	ns	0.365719045233208	ns	ns
IgG4	age	log10_cb_mot_ratio	Measles	vaccine_antigens	0.00317911888148302	-0.000955957800308059	0.0073141955632741	0.13131836433684	-33.6692305801948	-22.680349139787	0.00447448846006548	0.00210084379996461	ns	ns	0.217953258417606	ns	ns
IgG1	mat_anemiaabnormal	log10_cb_mot_ratio	Measles	vaccine_antigens	-0.00754273194254342	-0.0173709584601843	0.00228549457509744	0.132007242378487	-1031.11826686214	-1020.08800545533	0.00438474489900675	0.00499356614846993	ns	ns	0.462025348324704	ns	ns
IgG3	hivload	log10_cb	Pertussis_toxin	vaccine_antigens	2.07769167454749e-07	-6.37104429668829e-08	4.79248777876381e-07	0.132239117189682	-107.109754373926	-98.9011590287422	0.0113686267321843	1.37015984775467e-07	ns	ns	0.617115880218514	ns	ns
IgG1	hivload_cat400/999	log10_cb	HepB	vaccine_antigens	-0.0978549868857379	-0.225849738056829	0.0301397642853526	0.132587955813908	-19.1998162867274	-5.60732193025192	9.64067810522717e-05	0.0645729307999323	ns	ns	0.503678765434991	ns	ns
IgG3	motHIV+	log10_cb	Pertussis_toxin	vaccine_antigens	0.0254839241872293	-0.00779302945331857	0.0587608778277772	0.132852901465874	-306.717670008079	-295.576471591551	0.00419138396671692	0.0169100820663818	ns	ns	0.371988124104448	ns	ns
IgG4	seasonrainy	log10_cb_mot_ratio	Cp17	other_antigens	0.0385396359906613	-0.0118563453300962	0.0889356173114188	0.133354188054447	-132.277663983077	-121.373295173569	0.00451805152224038	0.0256007678658195	ns	ns	0.341292770840117	ns	ns
IgG4	weight_g_catlow	log10_cb_mot_ratio	Pertussis_toxin	vaccine_antigens	-0.0544349773417084	-0.125661970358743	0.0167920156753265	0.133623249224202	-191.293011856506	-180.273042054992	0.0043349266136421	0.0361887816908679	ns	ns	0.311787581523138	ns	ns
IgG3	hemoglobin	log10_cb_mot_ratio	HiB	vaccine_antigens	-0.0168796987409544	-0.0389704881816266	0.00521109069971776	0.133696389195778	143.479147907346	154.509409314151	0.00431703222274082	0.0112239800482739	ns	ns	0.618689381824232	ns	ns
IgG2	age_catbetween_20_30	log10_cb_mot_ratio	RSV	other_antigens	0.0110439739126052	-0.00342943323626805	0.0255173810614785	0.134215445099358	-868.503775507936	-853.893818786862	0.000998013541672726	0.00735283461006792	ns	ns	0.268430890198715	ns	ns
IgG3	malaria_placentariaYes	log10_cb_mot_ratio	Pneumo	other_antigens	0.0262848068013258	-0.00817467322969399	0.0607442868323456	0.134375982960582	-708.96604357138	-697.915304269364	0.00426060568682485	0.0175088182610533	ns	ns	0.878898298972673	ns	ns
IgG1	age_catbetween_20_30	log10_cb_mot_ratio	Pneumo	other_antigens	-0.00947176190469647	-0.0218965738287533	0.00295305001936039	0.134596548720219	-965.377704217955	-950.684411149269	0.014303483925257	0.00631266633714199	ns	ns	0.209376929063053	ns	ns
IgG1	age_catbetween_20_30	log10_cb_mot_ratio	HepB	vaccine_antigens	-0.0153417476871726	-0.0354673034484956	0.00478380807415039	0.134599454397677	-677.950218874949	-663.326251631669	0.0066775101187313	0.0102244160656738	ns	ns	0.209376929063053	ns	ns
IgG3	treatmentmq_split	log10_cb	Cp17	other_antigens	0.0279120544877689	-0.00874612428643302	0.0645702332619708	0.134709419628063	-316.15224439472	-303.425110193552	0.02032994564679	0.0185741524645122	ns	ns	0.471482968698219	ns	ns
IgG2	log10_pf_exposure	log10_cb_mot_ratio	Shiga_toxin	other_antigens	-0.0432536730548681	-0.100029100943181	0.0135217548334447	0.134847399707441	-987.38499210841	-976.365022306896	0.00428624933231669	0.0288462769271247	ns	ns	0.459542474398942	ns	ns
IgG4	hemoglobin	log10_cb_mot_ratio	Pertussis_toxin	vaccine_antigens	-0.00948480869928757	-0.0219434050713446	0.00297378767276946	0.135116834891271	-189.772399034418	-178.762756265477	0.00429048251907838	0.00632983118027306	ns	ns	0.315272614746298	ns	ns
IgG1	haart_2no	log10_cb_mot_ratio	Shiga_toxin	other_antigens	0.00738409668903837	-0.00235849075110781	0.0171266841291845	0.135415007608901	-434.651589044842	-427.431431303049	0.0154967191123477	0.00489561655980033	ns	ns	0.719258354446297	ns	ns
IgG	motHIV+	log10_cb_mot_ratio	Diphteria_toxin	vaccine_antigens	-0.00520452460717315	-0.0120485154157764	0.00163946620143009	0.135540291081939	-1204.60409638159	-1193.66775568866	0.00438046161049765	0.00347685656438407	ns	ns	0.158130339595595	ns	ns
IgG4	cd4_cells_cat<350	log10_cb	Pneumo	other_antigens	-0.0760935693719989	-0.176587158483217	0.0244000197392191	0.136271880856711	9.57486586578086	17.6212595471535	0.0115807539739945	0.0506878482328421	ns	ns	0.635935443997984	ns	ns
IgG	haart_2no	log10_cb_mot_ratio	VSP5	other_antigens	0.024440767944145	-0.00797010844855051	0.0568516443368405	0.137293409334376	-234.054229991349	-226.945886433948	0.0158320678887772	0.0162766126054797	ns	ns	0.395161943968003	ns	ns
IgG3	age_cat>30	log10_cb_mot_ratio	Pertussis_toxin	vaccine_antigens	0.0348363241037039	-0.011201272611183	0.0808739208185908	0.137495338601755	-317.329318702647	-302.594999633292	0.00460610672983286	0.0233913101855117	ns	ns	0.599614569451604	ns	ns
IgG2	mat_anemiaabnormal	log10_cb_mot_ratio	Pneumo	other_antigens	-0.0137346086346731	-0.0318993602980023	0.00443014302865614	0.137763453081713	-652.983133285313	-642.111080766751	0.00438520959001221	0.0092271129207925	ns	ns	0.642896114381329	ns	ns
IgG1	motHIV+	log10_cb	Cp17	other_antigens	-0.0176353954512498	-0.0409624723591618	0.00569168145666211	0.137870201901714	-521.99934551224	-510.858147095712	0.00400156012529063	0.011853933179777	ns	ns	0.214464758513778	ns	ns
IgG	weight_g_catlow	log10_cb_mot_ratio	VSP5	other_antigens	-0.0120926876040437	-0.0280934106742399	0.00390803546615251	0.137969964435638	-1049.69238425147	-1038.70350281106	0.00420807044359417	0.00812923736215029	ns	ns	0.95294454184857	ns	ns
IgG3	treatmentmq_full	log10_cb	Diphteria_toxin	vaccine_antigens	0.0437731525540458	-0.014244749436986	0.101791054545078	0.138264815815763	-155.400039254381	-142.718103274228	0.00536950097256661	0.0293944394199794	ns	ns	0.563787500102579	ns	ns
IgG2	age	log10_cb	Diphteria_toxin	vaccine_antigens	0.00202646479898402	-0.000659719276262271	0.00471264887423032	0.138677361931952	-278.637832554318	-267.638552489981	0.00416597826331755	0.00136474777838389	ns	ns	0.834213247162349	ns	ns
IgG4	age	log10_cb_mot_ratio	Pneumo	other_antigens	0.00121686762717023	-0.000396460579245382	0.00283019583358584	0.13874214994953	-575.072199241759	-564.125276527275	0.00423748887177156	0.000819609049307716	ns	ns	0.217953258417606	ns	ns
IgG4	malaria_placentariaYes	log10_cb_mot_ratio	Pneumo	other_antigens	0.032359015250685	-0.0106252432471045	0.0753432737484745	0.139498935962046	-575.063747685243	-564.116824970759	0.00420785553246605	0.0218370242970231	ns	ns	0.863571561822308	ns	ns
IgG1	weight_g	log10_cb_mot_ratio	Rotavirus	other_antigens	7.93369881604121e-06	-2.61324772583274e-06	1.84806453579152e-05	0.139822942296562	-1005.92161128406	-994.881093457009	0.00406514215033926	5.35881357141319e-06	ns	ns	0.659890332048338	ns	ns
IgG3	age_catbetween_20_30	log10_cb	VSP5	other_antigens	0.0367750319087768	-0.0121870554466535	0.0857371192642071	0.140436483743589	-164.274526705033	-149.419595482995	0.000831442782254999	0.0248803356035591	ns	ns	0.419846895929303	ns	ns
IgG3	hivload_cat>9999	log10_cb_mot_ratio	Shiga_toxin	other_antigens	0.0640038423826523	-0.0214621370707402	0.149469821836045	0.140537486246793	-134.705160930627	-121.341016758318	-0.00442909545004699	0.0430935938002122	ns	ns	0.613418122568888	ns	ns
IgG4	age_cat>30	log10_cb_mot_ratio	HiB	vaccine_antigens	0.0869885234412207	-0.0288932929329618	0.202870339815403	0.140635839994168	218.285449664503	232.964973356426	0.00805887824152274	0.0588751355162637	ns	ns	0.196890175991835	ns	ns
IgG1	haartno	log10_cb_mot_ratio	Shiga_toxin	other_antigens	0.00690484985754539	-0.00231806102960101	0.0161277607446918	0.140768864555854	-605.679846876526	-597.497683420389	0.0106081104627448	0.00465435285196288	ns	ns	0.604056454445619	ns	ns
IgG1	age_cat>30	log10_cb_mot_ratio	VSP5	other_antigens	-0.0187373385240358	-0.0437083335317826	0.0062336564837109	0.140802884282182	-677.034456088624	-662.30013701927	0.0137827225670979	0.0126875495583415	ns	ns	0.258743879638239	ns	ns
IgG3	haartno	log10_cb	HiB	vaccine_antigens	-0.139208146642816	-0.325192497546215	0.046776204260584	0.14094703319388	85.7921519188433	94.1546271471894	0.00995849464069243	0.0939185765854582	ns	ns	0.308663759991745	ns	ns
IgG4	graviditymultigravidae	log10_cb	Cp17	other_antigens	0.048553955381021	-0.0161950722757785	0.11330298303782	0.141068459873093	9.60273091759069	20.6940113771069	0.00395032153779951	0.0329007493457101	ns	ns	0.323039665247087	ns	ns
IgG	haart_2no	log10_cb_mot_ratio	Pertussis_toxin	vaccine_antigens	0.0114229364003352	-0.00387594170501467	0.026721814505685	0.141129265702858	-348.382997662227	-341.312871182158	0.015489107603468	0.00768142215305121	ns	ns	0.395161943968003	ns	ns
IgG2	weight_g	log10_cb	Diphteria_toxin	vaccine_antigens	-2.75996533511824e-05	-6.44248103755903e-05	9.22550367322559e-06	0.141260681737372	-276.775472078035	-265.786590637628	0.00408151063270867	1.87091821436165e-05	ns	ns	0.234315273143694	ns	ns
IgG4	treatmentmq	log10_cb	Measles	vaccine_antigens	0.0702219203954508	-0.0236783897299549	0.164122230520856	0.141329371501399	24.0971068686993	32.5336599348165	0.00967585327948961	0.0474300580219611	ns	ns	0.964166868313074	ns	ns
IgG3	gest_age	log10_cb_mot_ratio	HepB	vaccine_antigens	0.00494495362643919	-0.00166246548971573	0.0115523727425941	0.141822187573548	-791.336574132393	-780.410852919579	0.00414748948312582	0.00335662251671672	ns	ns	0.283644375147095	ns	ns
IgG3	hivload_cat400/999	log10_cb	Shiga_toxin	other_antigens	-0.0681575384073836	-0.159473885855713	0.0231588090409453	0.141953443415218	-91.1384483328631	-77.4574560908906	0.0646461796603834	0.0460782859966509	ns	ns	0.662449402604349	ns	ns
IgG4	age	log10_cb_mot_ratio	OSP	other_antigens	0.00476921325732847	-0.00160906536276545	0.0111474918774224	0.142192883126721	218.2176208426	229.227263611542	0.00401808197378506	0.00324060798506096	ns	ns	0.217953258417606	ns	ns
IgG3	treatmentmq	log10_cb	VSP5	other_antigens	0.0467491518339342	-0.0159152677529221	0.10941357142079	0.142298225210391	-74.9041370234695	-66.4432923266544	0.00951049582887242	0.0316550936721427	ns	ns	0.672312464116305	ns	ns
IgG1	weight_g_catlow	log10_cb	Tetanus_toxin	vaccine_antigens	-0.0261571200312999	-0.0611648919386792	0.00885065187607932	0.142507282285029	-626.571787222393	-615.440506170269	0.00384566191117186	0.0177893786975534	ns	ns	0.624220734057744	ns	ns
IgG3	weight_g_catlow	log10_cb	OSP	other_antigens	-0.0969467642795578	-0.22688687726066	0.0329933487015444	0.143089746077079	165.576377273938	176.707658326062	0.00382483640858278	0.0660297343098393	ns	ns	0.369337743586793	ns	ns
IgG3	age	log10_cb	VSP5	other_antigens	0.00240952992435462	-0.000823161756508074	0.00564222160521731	0.143479071031119	-166.167242859964	-155.026044443435	0.00379827485535544	0.00164273094854718	ns	ns	0.442719831048602	ns	ns
IgG3	prematurityYes	log10_cb	Pneumo	other_antigens	-0.0447087939539368	-0.104702805427513	0.0152852175196399	0.143543762776557	-402.584177156597	-391.502980740189	0.00387339684716348	0.0304841715308525	ns	ns	0.425766769220579	ns	ns
IgG3	mat_anemia_recatabnormal	log10_cb_mot_ratio	MSP1_42_3D7	exposure_antigen	-0.00913098377981614	-0.0213846285171551	0.00312266095752286	0.143563879420677	-964.695172403845	-953.66491099704	0.00393962296673978	0.0062258827109777	ns	ns	0.837740230813295	ns	ns
IgG4	cd4_cells	log10_cb	Diphteria_toxin	vaccine_antigens	-9.02601924778633e-05	-0.000211721822340073	3.12014373843464e-05	0.143617705234899	-69.1569162492574	-61.1384297458716	0.0109273394046741	6.1257158681119e-05	ns	ns	0.67021595776286	ns	ns
IgG2	malaria_placentariaYes	log10_cb_mot_ratio	HepB	vaccine_antigens	-0.0195515044936481	-0.0458156599779738	0.00671265099067765	0.143920420950727	-834.881631385143	-824.064225186255	0.00421824889796729	0.0133402590084824	ns	ns	0.882944418650265	ns	ns
IgG3	treatmentmq	log10_cb	Pertussis_toxin	vaccine_antigens	0.0391180372481489	-0.0135517691261726	0.0917878436224704	0.144066956596351	-117.994498750841	-109.533654054026	0.00935595355477314	0.0266062889509707	ns	ns	0.672312464116305	ns	ns
IgG2	seasonrainy	log10_cb_mot_ratio	Diphteria_toxin	vaccine_antigens	0.012549064716521	-0.00432107187191023	0.0294192013049522	0.144220737714688	-729.029893395152	-718.201478009597	0.00419087115110095	0.00856893078639585	ns	ns	0.504772582001408	ns	ns
IgG3	haartno	log10_cb	RSV	other_antigens	-0.0914725889881459	-0.214901331941214	0.0319561539649219	0.144880776884419	-12.6074942808042	-4.24501905245804	0.00960243750855971	0.0623291787270078	ns	ns	0.308663759991745	ns	ns
IgG	seasonrainy	log10_cb	Pertussis_toxin	vaccine_antigens	0.0147346613693905	-0.00510724529140237	0.0345765680301834	0.144936270782456	-669.125641134164	-658.115998365222	0.00391652381500984	0.0100810649696662	ns	ns	0.970697868795343	ns	ns
IgG4	weight_g_catlow	log10_cb	HepB	vaccine_antigens	-0.0368761237698654	-0.0865661866427106	0.0128139391029797	0.145213782045401	-411.162850858803	-400.061520138631	0.00378767006617831	0.0252492270550619	ns	ns	0.225888105403957	ns	ns
IgG	hivload	log10_cb	HiB	vaccine_antigens	8.76761660225301e-08	-3.07691469777673e-08	2.06121479022827e-07	0.145227833866565	-288.782207918011	-280.653617314074	0.0103676330774314	5.97614812622611e-08	ns	ns	0.677729891377305	ns	ns
IgG4	haartno	log10_cb_mot_ratio	OSP	other_antigens	-0.154152100871172	-0.362442588909377	0.0541383871670332	0.145319126690642	97.8137132257959	105.969209839681	0.0102639999480636	0.105103510449071	ns	ns	0.443832254452778	ns	ns
IgG1	treatmentmq	log10_cb_mot_ratio	Tetanus_toxin	vaccine_antigens	0.011579012165855	-0.00408428650839599	0.0272423108401059	0.145839854411943	-401.767496256633	-393.48097445224	0.00976727504293484	0.00790753182690416	ns	ns	0.408351592353441	ns	ns
IgG2	hivload	log10_cb_mot_ratio	VSP5	other_antigens	1.51366023383498e-07	-5.35170029644092e-08	3.56249049731406e-07	0.145923070570879	-160.813993935653	-152.823676653317	0.0107999958387243	1.03317775690913e-07	ns	ns	0.553683518459165	ns	ns
IgG3	age_cat>30	log10_cb	Pneumo	other_antigens	-0.0289488284768873	-0.0680520880624054	0.0101544311086309	0.14619726809453	-413.43652252027	-398.581591298233	0.0132657470987142	0.0198705217491688	ns	ns	0.733015097800292	ns	ns
IgG2	malaria_placentariaYes	log10_cb	HiB	vaccine_antigens	0.0441238225467312	-0.0155016507808989	0.103749295874361	0.146358942740102	-380.141685896394	-369.020355102148	0.00372212675146311	0.0302985793978801	ns	ns	0.790475453233724	ns	ns
IgG	hemoglobin	log10_cb	Cp17	other_antigens	0.00383598794949891	-0.00135019790170201	0.00902217380069983	0.146547470715796	-703.612220832089	-692.531024415681	0.0037660756582697	0.00263520600132765	ns	ns	0.297050234195846	ns	ns
IgG1	mat_anemia_recatabnormal	log10_cb_mot_ratio	Measles	vaccine_antigens	-0.00809023623909959	-0.0190295597008996	0.00284908722270043	0.146591336193682	-1030.95550172798	-1019.92524032117	0.00382961947468163	0.0055580968985562	ns	ns	0.513069676677885	ns	ns
IgG1	cd4_cells	log10_cb_mot_ratio	Tetanus_toxin	vaccine_antigens	2.04325339848569e-05	-7.28617383068778e-06	4.81512418004016e-05	0.146767822986545	-372.234713368609	-364.33052640392	0.0110364211951307	1.397301739714e-05	ns	ns	0.50856227217655	ns	ns
IgG2	treatmentmq_full	log10_cb	Shiga_toxin	other_antigens	-0.035103296398762	-0.0827091113197811	0.0125025185222571	0.147380255827779	-224.314363621726	-211.587229420558	0.00566381162560714	0.02412115642697	ns	ns	0.687774527196301	ns	ns
IgG3	weight_g_catlow	log10_cb	HepB	vaccine_antigens	-0.041505852318296	-0.0977656908740872	0.0147539862374952	0.147589018729013	-336.905625263905	-325.804294543733	0.00370425091587645	0.028587555652955	ns	ns	0.369337743586793	ns	ns
IgG1	age_cat>30	log10_cb_mot_ratio	Pertussis_toxin	vaccine_antigens	-0.00790146338977035	-0.0186189918611606	0.00281606508161993	0.147853645507565	-1174.38506894502	-1159.65074987567	0.00519433196296393	0.00544548479471945	ns	ns	0.258743879638239	ns	ns
IgG3	haartno	log10_cb_mot_ratio	HepB	vaccine_antigens	-0.0279135868651002	-0.0658901340280012	0.0100629602978009	0.148049324258837	-281.026041237365	-272.897450633428	0.0100991004923057	0.0191610343557907	ns	ns	0.363876316409423	ns	ns
IgG3	age	log10_cb	Tetanus_toxin	vaccine_antigens	-0.00367204842424498	-0.00865935586099036	0.00131525901250041	0.148404896835372	96.5828700263889	107.724068442917	0.003626954856636	0.00253435993440451	ns	ns	0.442719831048602	ns	ns
IgG	hemoglobin	log10_cb	RSV	other_antigens	0.00219352553044376	-0.000786669407993708	0.00517372046888124	0.148525117097923	-1033.16547659274	-1022.09439822977	0.00370936537208255	0.00151427615178161	ns	ns	0.297050234195846	ns	ns
IgG4	hivload_cat1000/9999	log10_cb	Tetanus_toxin	vaccine_antigens	-0.155355139592152	-0.366990463280162	0.0562801840958578	0.148584935772687	109.844468234838	123.525460476811	0.00504136859973447	0.10679131660854	ns	ns	0.845281460041131	ns	ns
IgG2	cd4_cells_cat<350	log10_cb	Cp17	other_antigens	-0.0316464798038376	-0.074776288439149	0.0114833288314738	0.148730309744028	-175.372195389286	-167.270754291909	0.0101287856843231	0.0217588465381643	ns	ns	0.336147606357426	ns	ns
IgG2	weight_g	log10_cb	HiB	vaccine_antigens	-2.27247305197637e-05	-5.36191607085544e-05	8.16969966902703e-06	0.148793681098256	-377.847799132013	-366.736451708044	0.00365019111002063	1.56987362712534e-05	ns	ns	0.234315273143694	ns	ns
IgG3	haart_2no	log10_cb	Cp17	other_antigens	0.0482803340940044	-0.0176240378864142	0.114184706074423	0.148919655146776	-122.777427081429	-115.379702725465	0.0128738704168242	0.0331466256295613	ns	ns	0.371745959110723	ns	ns
IgG1	hemoglobin	log10_cb_mot_ratio	Measles	vaccine_antigens	0.00217369861224605	-0.000783333604244927	0.00513073082873702	0.149033775064273	-1030.93002927258	-1019.89976786577	0.00374271532262693	0.00150242120994061	ns	ns	0.521618212724954	ns	ns
IgG4	haartno	log10_cb	Tetanus_toxin	vaccine_antigens	-0.154233711624859	-0.364596191290477	0.0561287680407598	0.14918380405801	115.352856190033	123.715331418379	0.00922508099495301	0.10622907014066	ns	ns	0.189870296073831	ns	ns
IgG	age_cat>30	log10_cb	Rotavirus	other_antigens	-0.0129706534531063	-0.0306248979827992	0.00468359107658659	0.149261418771159	-885.087196679582	-870.285422386019	0.00239748934161921	0.00897060380949681	ns	ns	0.232184429199581	ns	ns
IgG	haartno	log10_cb_mot_ratio	OSP	other_antigens	0.00705192810056628	-0.00257329787053194	0.0166771540716645	0.149318112015621	-582.385035000483	-574.310991353796	0.0101682274627876	0.00485538070784219	ns	ns	0.298636224031241	ns	ns
IgG	treatmentmq	log10_cb_mot_ratio	RSV	other_antigens	-0.0061172470032968	-0.0144715583841552	0.00223706437756157	0.149612490843168	-533.837487824509	-525.655324368372	0.00977206093198524	0.00421601308713446	ns	ns	0.589011726057623	ns	ns
IgG	age_catbetween_20_30	log10_cb	Rotavirus	other_antigens	-0.0107901189833554	-0.0255129649280054	0.00393272696129453	0.150269095613298	-885.087196679582	-870.285422386019	0.00239748934161921	0.00748108012753401	ns	ns	0.300538191226596	ns	ns
IgG2	haart_2no	log10_cb_mot_ratio	HepB	vaccine_antigens	0.0254661180471822	-0.00947140171228752	0.0604036378066519	0.150483361315314	-208.331066254722	-201.501067897674	0.0154395944548658	0.0175174837818992	ns	ns	0.677046907718009	ns	ns
IgG4	haart_2no	log10_cb_mot_ratio	VSP5	other_antigens	-0.116207858490094	-0.275555352285758	0.043139635305571	0.150606565277242	23.6596260348788	30.8797837766716	0.0134736543271058	0.0800715656062957	ns	ns	0.448240206218389	ns	ns
IgG1	treatmentmq_full	log10_cb_mot_ratio	Measles	vaccine_antigens	-0.010371355759763	-0.0245540526914093	0.00381134117188338	0.150728448934704	-651.272619896803	-638.590683916651	0.0157058673500126	0.00718558257817815	ns	ns	0.480683470576199	ns	ns
IgG4	hivload	log10_cb	Pertussis_toxin	vaccine_antigens	2.70900662658246e-07	-1.00376735151323e-07	6.42178060467816e-07	0.151054394000389	-35.7315159130364	-27.5229205678529	0.00955422809988449	1.87384010927171e-07	ns	ns	0.862964663593065	ns	ns
IgG2	age_cat>30	log10_cb	HiB	vaccine_antigens	-0.0303538860232006	-0.0718513306064658	0.0111435585600647	0.151061537777731	-378.156634530457	-363.328193471461	0.0004285555970438	0.0210865659105116	ns	ns	0.704953842962747	ns	ns
IgG4	mat_anemiaabnormal	log10_cb	Diphteria_toxin	vaccine_antigens	-0.0303542206515171	-0.0718618613799775	0.0111534200769433	0.151148784196116	-185.581237826244	-174.510159463272	0.00361867810044114	0.0210905768817865	ns	ns	0.776576135306473	ns	ns
IgG4	graviditymultigravidae	log10_cb	Pertussis_toxin	vaccine_antigens	-0.0439149675997947	-0.103992870676466	0.0161629354768771	0.151342503370226	-31.4320390607319	-20.3007580086073	0.00353959434606332	0.0305288943270493	ns	ns	0.323039665247087	ns	ns
IgG	age_cat>30	log10_cb_mot_ratio	HepB	vaccine_antigens	-0.00678872652161976	-0.0160838699583711	0.00250641691513158	0.151642114719911	-1216.5599275329	-1201.97813994233	0.00630920767371534	0.0047220082769727	ns	ns	0.37733901650542	ns	ns
IgG3	prematurityYes	log10_cb	HepB	vaccine_antigens	-0.0491944705986577	-0.116616171020798	0.0182272298234825	0.152059560435921	-330.051845073481	-319.001105771465	0.00361226019277838	0.0342568807909983	ns	ns	0.425766769220579	ns	ns
IgG1	haartno	log10_cb_mot_ratio	HepB	vaccine_antigens	-0.0291345309815188	-0.0692206238071315	0.0109515618440939	0.152546406143734	-262.149018575936	-254.102624894563	0.00995903385536112	0.0202189792141224	ns	ns	0.604056454445619	ns	ns
IgG	treatmentmq_full	log10_cb	RSV	other_antigens	-0.010827383381879	-0.0257026444076033	0.0040478776438452	0.152618948010894	-632.439876411159	-619.757940431007	0.0177685408624678	0.00753646622976163	ns	ns	0.50032417239344	ns	ns
IgG1	graviditymultigravidae	log10_cb_mot_ratio	OSP	other_antigens	0.00725155903177042	-0.00271722139084084	0.0172203394543817	0.153309345496879	-1097.50843366146	-1086.45769435945	0.00356967966949473	0.00506512473626204	ns	ns	0.354943075363683	ns	ns
IgG2	log10_pf_exposure	log10_cb_mot_ratio	OSP	other_antigens	-0.0902394347238942	-0.214362792770457	0.0338839233226682	0.15353305799589	-524.554366664774	-513.544723895833	0.00361173277838822	0.0630632760304767	ns	ns	0.459542474398942	ns	ns
IgG1	graviditymultigravidae	log10_cb_mot_ratio	HiB	vaccine_antigens	-0.0121523957243776	-0.0288905652738657	0.00458577382511053	0.15409805961119	-792.787158360932	-781.736419058916	0.00354300901080329	0.00850464279788525	ns	ns	0.354943075363683	ns	ns
IgG4	motHIV+	log10_cb_mot_ratio	Pertussis_toxin	vaccine_antigens	0.029439377858241	-0.0111162964941616	0.0699950522106437	0.154166360714702	-192.67248324377	-181.642221836965	0.00356520455032705	0.0206056954640825	ns	ns	0.269791131250729	ns	ns
IgG3	haart_2no	log10_cb	HiB	vaccine_antigens	-0.139054918651621	-0.331423083061062	0.0533132457578205	0.154322020041138	63.6124651058975	71.0101894618613	0.0122395809587534	0.0967516317524455	ns	ns	0.371745959110723	ns	ns
IgG3	haartno	log10_cb	Cp17	other_antigens	0.0446458040623249	-0.0170248565018264	0.106316464626476	0.154331879995872	-179.132864487768	-170.770389259422	0.00878928280056157	0.0311425161801835	ns	ns	0.308663759991745	ns	ns
IgG1	cd4_cells_cat<350	log10_cb_mot_ratio	Tetanus_toxin	vaccine_antigens	-0.0118081973470009	-0.0281341991181382	0.00451780442413644	0.154437932304479	-372.15511727607	-364.250930311381	0.010271876923425	0.00822994738037205	ns	ns	0.608544716357413	ns	ns
IgG4	haartno	log10_cb_mot_ratio	HiB	vaccine_antigens	-0.160771761095257	-0.383146834623592	0.0616033124330788	0.154775487128705	113.604652150057	121.786815606194	0.00930907102589795	0.11222184301103	ns	ns	0.443832254452778	ns	ns
IgG4	mat_anemiaabnormal	log10_cb	Shiga_toxin	other_antigens	0.0444022779971232	-0.016866391775661	0.105670947769907	0.154857708181826	50.8467255283258	61.9680563225724	0.00343485584558856	0.0311335667813135	ns	ns	0.776576135306473	ns	ns
IgG3	weight_g_catlow	log10_cb	VSP5	other_antigens	-0.0544592295144839	-0.129610604035441	0.0206921450064736	0.154890330632966	-165.155460925203	-154.024179873078	0.00342230540305211	0.038188556087832	ns	ns	0.369337743586793	ns	ns
IgG4	prematurityYes	log10_cb_mot_ratio	RSV	other_antigens	0.0397593855115771	-0.0151721629934688	0.094690934016623	0.155325272879294	-477.701733163397	-466.818869822325	0.00370552321546747	0.0279039167492332	ns	ns	0.55829503087394	ns	ns
IgG3	treatmentmq_split	log10_cb_mot_ratio	Diphteria_toxin	vaccine_antigens	0.00669004857809879	-0.00256965316046995	0.0159497503166675	0.15564189666778	-788.565230540828	-775.952064162836	0.00105813646953845	0.00469079197900071	ns	ns	0.583051034366799	ns	ns
IgG4	age	log10_cb_mot_ratio	HiB	vaccine_antigens	0.00460778866535603	-0.00176338841270186	0.0109789657434139	0.155680898869719	218.612680835968	229.62232360491	0.00353858024320608	0.00323699990908954	ns	ns	0.217953258417606	ns	ns
IgG1	hemoglobin	log10_cb	Pertussis_toxin	vaccine_antigens	0.00483024887452185	-0.00185241048355928	0.011512908232603	0.15594492963524	-559.421227872098	-548.299897077851	0.00339939280327506	0.00339578159886878	ns	ns	0.436645802978671	ns	ns
IgG1	weight_g_catlow	log10_cb	HiB	vaccine_antigens	-0.0517615740494079	-0.123404449660338	0.0198813015615223	0.156123420522809	-194.033117848741	-182.901836796617	0.00338224894948902	0.0364056943868486	ns	ns	0.624220734057744	ns	ns
IgG2	mat_anemiaabnormal	log10_cb	Shiga_toxin	other_antigens	-0.0210892169915482	-0.0502975147246318	0.00811908074153545	0.156381154154644	-392.979740610811	-381.888460151295	0.00341966516241787	0.0148415338007032	ns	ns	0.437867231633004	ns	ns
IgG3	hivload_cat>9999	log10_cb_mot_ratio	MSP1_42_3D7	exposure_antigen	-0.0211609950777747	-0.0505875999255476	0.00826560976999819	0.156838298095585	-362.876070520056	-349.511926347746	0.00490097878313489	0.0148374612253852	ns	ns	0.613418122568888	ns	ns
IgG3	hivload_cat>9999	log10_cb	Shiga_toxin	other_antigens	0.0750803383375081	-0.0293439000410213	0.179504576716037	0.157024106412059	-91.1384483328631	-77.4574560908906	0.0646461796603834	0.0526925359526781	ns	ns	0.470259170408245	ns	ns
IgG3	haart_2no	log10_cb_mot_ratio	Pertussis_toxin	vaccine_antigens	-0.0553942993500487	-0.132750275945049	0.0219616772449518	0.158024967403793	-94.8581673946172	-87.6380096528244	0.0125665228947973	0.038871111226314	ns	ns	0.293478318590183	ns	ns
IgG3	age	log10_cb	Pneumo	other_antigens	-0.00155086047291501	-0.00370774420989409	0.000606023264064077	0.158114225374501	-411.385544219659	-400.244345803131	0.00330726676511128	0.00109604627256259	ns	ns	0.442719831048602	ns	ns
IgG3	weight_g_catlow	log10_cb	HiB	vaccine_antigens	-0.0981096133559567	-0.234614881820511	0.0383956551085981	0.15828760439434	195.347256867778	206.478537919903	0.00331280392876876	0.0693658517129249	ns	ns	0.369337743586793	ns	ns
IgG4	treatmentmq	log10_cb_mot_ratio	MSP1_42_3D7	exposure_antigen	-0.00606747181649468	-0.0145401851896244	0.00240524155663504	0.158674029188726	-527.007798708677	-518.852302094792	0.00905307460995841	0.00427533646366693	ns	ns	0.915696416545398	ns	ns
IgG4	graviditymultigravidae	log10_cb_mot_ratio	Rotavirus	other_antigens	0.0433832411043634	-0.0170405281225589	0.103807010331286	0.158695626921274	-38.161149120786	-27.1206312937348	0.00340224112922349	0.0307008017233809	ns	ns	0.201976252445258	ns	ns
IgG3	haart_2no	log10_cb	OSP	other_antigens	-0.127304990745601	-0.305579590721473	0.0509696092302705	0.159319696761738	50.3735009595047	57.7712253154684	0.011674494978086	0.0896632688710809	ns	ns	0.371745959110723	ns	ns
IgG	seasonrainy	log10_cb	Diphteria_toxin	vaccine_antigens	0.0165760080259841	-0.00657414311779114	0.0397261591697594	0.159816101122119	-570.801024683879	-559.83304925142	0.00344897369475761	0.011761183610112	ns	ns	0.970697868795343	ns	ns
IgG4	log10_pf_exposure	log10_cb_mot_ratio	VSP5	other_antigens	-0.223608853304736	-0.536057140552384	0.0888394339429105	0.160038993806259	11.1041921932518	22.144710020303	0.00335848638703173	0.158752309535268	ns	ns	0.400358916143562	ns	ns
IgG4	seasonrainy	log10_cb_mot_ratio	HepB	vaccine_antigens	0.021843599464094	-0.00868734363765623	0.0523745425658443	0.160131706122806	-414.047851276277	-403.132787268276	0.0035003348202125	0.0155097254812508	ns	ns	0.341292770840117	ns	ns
IgG2	log10_mother	log10_cb_mot_ratio	Shiga_toxin	other_antigens	-0.0305621909630341	-0.0732794581684395	0.0121550762423714	0.160158827577067	-987.11964598061	-976.099676179096	0.00337790128028481	0.021703651829822	ns	ns	0.160158827577067	ns	ns
IgG4	hivload	log10_cb_mot_ratio	HepB	vaccine_antigens	1.33497596998664e-07	-5.3698297055745e-08	3.20693491053073e-07	0.160292559925445	-179.734407802949	-171.744090520613	0.00943336533620154	9.43985635946791e-08	ns	ns	0.323248469242502	ns	ns
IgG4	seasonrainy	log10_cb	Cp17	other_antigens	0.0459602314805756	-0.0183120628677647	0.110232525828916	0.160370024420875	14.9444636475788	25.9541064165204	0.00338276564889217	0.0326547839455081	ns	ns	0.545991943733662	ns	ns
IgG2	weight_g	log10_cb	OSP	other_antigens	-3.1968283071911e-05	-7.67105006151283e-05	1.27739344713063e-05	0.160730764797789	-158.691300947955	-147.600020488439	0.00327956638329807	2.27347427109362e-05	ns	ns	0.234315273143694	ns	ns
IgG4	haartno	log10_cb_mot_ratio	Shiga_toxin	other_antigens	-0.093099794483637	-0.223763803117513	0.0375642141502389	0.160779015687133	-6.56774437463391	1.61441908150311	0.0087920042118258	0.0659397459951116	ns	ns	0.443832254452778	ns	ns
IgG1	hivload_cat1000/9999	log10_cb_mot_ratio	Cp17	other_antigens	-0.0191477227311918	-0.0460394533868164	0.00774400792443284	0.160902943353671	-351.026743954809	-337.709548484249	0.0180324249874998	0.0135577488978263	ns	ns	0.459253220067392	ns	ns
IgG2	hemoglobin	log10_cb_mot_ratio	Rotavirus	other_antigens	0.00381295716354298	-0.00152638393402383	0.00915229826110979	0.160928492545331	-684.8537000549	-673.854419990562	0.00337631854379083	0.00271271576958849	ns	ns	0.455305986200962	ns	ns
IgG3	motHIV+	log10_cb	Tetanus_toxin	vaccine_antigens	-0.0462307293287458	-0.110984012500143	0.0185225538426517	0.161061615331032	96.7082440469909	107.849442463519	0.00321459465025009	0.0329051554515423	ns	ns	0.375810435772408	ns	ns
IgG3	treatmentmq_full	log10_cb	Pneumo	other_antigens	-0.033091330018673	-0.0794956262161791	0.0133129661788332	0.161082142886451	-233.414745545711	-220.687611344543	0.00598032687511441	0.023512364809226	ns	ns	0.563787500102579	ns	ns
IgG	hivload_cat>9999	log10_cb	Cp17	other_antigens	-0.0387928397537551	-0.0932962477177752	0.0157105682102649	0.161173643621022	-235.127458133969	-221.534963777493	0.0601034108961008	0.0274967899747444	ns	ns	0.439259208245243	ns	ns
IgG3	cd4_cells_cat<350	log10_cb	Rotavirus	other_antigens	0.0436384190687624	-0.0176877731807161	0.104964611318241	0.161273927122179	-97.9338106897887	-89.8323695924114	0.00899571058108084	0.0309388621964316	ns	ns	0.593196648854904	ns	ns
IgG4	graviditymultigravidae	log10_cb	VSP5	other_antigens	0.0523244301378845	-0.0210444726991194	0.125693332974888	0.161519832623543	89.8972153485821	101.03841376511	0.00320036021504866	0.0372832856485508	ns	ns	0.323039665247087	ns	ns
IgG3	treatmentmq	log10_cb_mot_ratio	Pertussis_toxin	vaccine_antigens	0.0365035247370496	-0.0148466323895795	0.0878536818636788	0.161797350402186	-123.928138061812	-115.641616257419	0.00840091386580111	0.0259238497739218	ns	ns	0.755054301876869	ns	ns
IgG2	graviditymultigravidae	log10_cb_mot_ratio	Rotavirus	other_antigens	-0.0140339495570653	-0.0337374185826807	0.00566951946855013	0.16202705784762	-690.712743298265	-679.69277349675	0.00331737424083489	0.0100108752162293	ns	ns	0.378063134977779	ns	ns
IgG4	gest_age	log10_cb_mot_ratio	VSP5	other_antigens	0.0195361144852384	-0.00790531001727472	0.0469775389877515	0.162210627025498	13.1490521663302	24.1065197071362	0.00338193980441603	0.0139411077575144	ns	ns	0.294826979186005	ns	ns
IgG	gest_age	log10_cb_mot_ratio	Diphteria_toxin	vaccine_antigens	-0.00227407711734171	-0.00547011808255993	0.000921963847876502	0.162414902492908	-1172.15916610205	-1161.30885280905	0.00349935433201565	0.00162343402749413	ns	ns	0.653672533843265	ns	ns
IgG3	haartno	log10_cb_mot_ratio	Rotavirus	other_antigens	0.0250425066975446	-0.0102501473080596	0.0603351607031488	0.162501097064776	-302.391431626016	-294.209268169879	0.00864768625796031	0.0178104794499589	ns	ns	0.363876316409423	ns	ns
IgG2	hemoglobin	log10_cb_mot_ratio	RSV	other_antigens	-0.00269873308548989	-0.00649316834009734	0.00109570216911756	0.162609280786058	-863.865754138542	-852.929413445613	0.00339294074974128	0.00192763367047898	ns	ns	0.455305986200962	ns	ns
IgG1	haart_2no	log10_cb	HepB	vaccine_antigens	-0.0866465303619703	-0.20899095795679	0.035697897232849	0.162683525998228	-15.1729069162377	-7.84495314676679	0.0115810040477939	0.0615117655038981	ns	ns	0.542937966475083	ns	ns
IgG	age_cat>30	log10_cb_mot_ratio	Diphteria_toxin	vaccine_antigens	-0.0067872494699585	-0.016332661658002	0.00275816271808495	0.162716371838551	-1202.49040838661	-1187.90862079604	0.000423203838544217	0.00484914683304882	ns	ns	0.37733901650542	ns	ns
IgG2	weight_g_catlow	log10_cb_mot_ratio	Tetanus_toxin	vaccine_antigens	0.0241364617732321	-0.00984164112689388	0.058114564673358	0.163126179429106	-603.624575043966	-592.698853831151	0.00338803438107893	0.0172611519361664	ns	ns	0.380081410484651	ns	ns
IgG1	weight_g	log10_cb	Rotavirus	other_antigens	1.25189767505886e-05	-5.10283054230315e-06	3.01407840434804e-05	0.16313141688515	-719.388510772805	-708.25722972068	0.00316119821611494	8.95461168159869e-06	ns	ns	0.500077591226478	ns	ns
IgG2	malaria_placentariaYes	log10_cb	MSP1_42_3D7	exposure_antigen	-0.0999984765593271	-0.24088340648982	0.0408864533711653	0.163498737285848	104.920330785511	116.011611245027	0.00319263177370621	0.0715874806769288	ns	ns	0.790475453233724	ns	ns
IgG1	hivload_cat1000/9999	log10_cb_mot_ratio	Rotavirus	other_antigens	-0.0128776007137419	-0.0310984513440307	0.00534324991654682	0.164019007166926	-432.656726520837	-419.292582348528	-0.00661711529427622	0.00918730401006169	ns	ns	0.459253220067392	ns	ns
IgG2	log10_pf_exposure	log10_cb_mot_ratio	Tetanus_toxin	vaccine_antigens	0.0761108353284763	-0.0312880884775484	0.183509759134501	0.164122312285336	-606.428606829076	-595.492266136146	0.0033433241957177	0.0545603674355269	ns	ns	0.459542474398942	ns	ns
IgG4	gest_age	log10_cb	Pertussis_toxin	vaccine_antigens	0.0178074347434924	-0.00732652164186958	0.0429413911288544	0.164251984464005	-25.1511568048308	-14.1004175028147	0.00321283984672338	0.0127705314803474	ns	ns	0.176886752499697	ns	ns
IgG1	treatmentmq_full	log10_cb_mot_ratio	HepB	vaccine_antigens	-0.019686814998628	-0.0475300687317724	0.00815643873451642	0.164611351350349	-409.99428763491	-397.381121256919	2.22103321689815e-06	0.0141048723779847	ns	ns	0.480683470576199	ns	ns
IgG1	haart_2no	log10_cb_mot_ratio	HepB	vaccine_antigens	-0.0293902759393568	-0.0711457909180747	0.0123652390393611	0.165060016360897	-189.378508606486	-182.270165049085	0.0122132800789035	0.0209694527607427	ns	ns	0.719258354446297	ns	ns
IgG1	mat_anemia_recatabnormal	log10_cb	OSP	other_antigens	-0.0206498203434701	-0.0498656267325772	0.00856598604563688	0.165278248267265	-465.648850726149	-454.527519931903	0.00310602359461687	0.0148459606297709	ns	ns	0.50110724286481	ns	ns
IgG	prematurityYes	log10_cb	Rotavirus	other_antigens	-0.0189740405298369	-0.0458716968391044	0.00792361577943049	0.166087960252926	-867.477095512224	-856.436577685173	0.00316650238823801	0.0136664697310298	ns	ns	0.419651453867655	ns	ns
IgG1	weight_g	log10_cb_mot_ratio	Measles	vaccine_antigens	7.07556749372894e-06	-2.95602432863502e-06	1.71071593160929e-05	0.166140411403969	-1035.27850908297	-1024.23799125592	0.00316487263178999	5.09696623445767e-06	ns	ns	0.659890332048338	ns	ns
IgG2	hivload	log10_cb_mot_ratio	Tetanus_toxin	vaccine_antigens	9.50985331290204e-08	-4.01703982080025e-08	2.30367464466043e-07	0.166227281403289	-246.464436818349	-238.502555767876	0.00899596599444696	6.82052018605289e-08	ns	ns	0.553683518459165	ns	ns
IgG	age_catbetween_20_30	log10_cb_mot_ratio	Tetanus_toxin	vaccine_antigens	-0.00594709937807475	-0.0143867647658668	0.00249256600971729	0.166528262188901	-1186.68457733682	-1172.01887058437	0.000149430897315006	0.00428780892547778	ns	ns	0.333056524377802	ns	ns
IgG2	mat_anemia_recatabnormal	log10_cb_mot_ratio	Diphteria_toxin	vaccine_antigens	0.0122780840027871	-0.00515855079081921	0.0297147187963934	0.166800501316453	-727.380636155746	-716.519433558595	0.00334030517730666	0.00885710995507175	ns	ns	0.667499276831766	ns	ns
IgG4	treatmentmq_split	log10_cb	HepB	vaccine_antigens	0.0327466027264648	-0.0138088431518645	0.0793020486047941	0.166828610952534	-230.938605073949	-218.234006143654	0.0157344071605213	0.0235880061799747	ns	ns	0.844116402752707	ns	ns
IgG1	motHIV+	log10_cb	VSP5	other_antigens	0.0276591025553883	-0.0116436685615641	0.0669618736723407	0.167114158099916	-205.861118034946	-194.719919618418	0.00303018757194284	0.0199721733005649	ns	ns	0.233959821339883	ns	ns
IgG	graviditymultigravidae	log10_cb_mot_ratio	MSP1_42_3D7	exposure_antigen	-0.0061083708678383	-0.0147888962174307	0.00257215448175414	0.167120392491316	-1167.78551253858	-1156.76554273707	0.00315630725470284	0.00441037342069621	ns	ns	0.437596187980104	ns	ns
IgG4	weight_g	log10_cb	Tetanus_toxin	vaccine_antigens	-6.53215015761502e-05	-0.000158171373295856	2.75283701435556e-05	0.167243751439946	278.539506797009	289.650854220977	0.00305690489588661	4.71808555794706e-05	ns	ns	0.585136030903845	ns	ns
IgG2	weight_g	log10_cb	Rotavirus	other_antigens	-2.05345335191455e-05	-4.97316466016822e-05	8.66257956339128e-06	0.167368052245496	-414.34871726608	-403.247386545907	0.00306348313397098	1.48360556407377e-05	ns	ns	0.234315273143694	ns	ns
IgG3	haart_2no	log10_cb_mot_ratio	Rotavirus	other_antigens	0.0279676752111305	-0.0120086649495735	0.0679440153718344	0.167701896337248	-203.119496875303	-195.89933913351	0.0114523498646568	0.0200879729428446	ns	ns	0.293478318590183	ns	ns
IgG4	malaria_placentariaYes	log10_cb	Cp17	other_antigens	-0.0821393535130894	-0.199079931233152	0.0348012242069734	0.167910802166135	9.86973791627554	20.9610183757918	0.00305746443399268	0.0594207013625522	ns	ns	0.662389297629748	ns	ns
IgG3	hivload_cat>9999	log10_cb	VSP5	other_antigens	0.082434822249294	-0.035266525267521	0.200136169766109	0.167949703717231	-63.8494370304217	-50.1684447884492	0.0229688238263657	0.0593921735222694	ns	ns	0.470259170408245	ns	ns
IgG2	cd4_cells_cat<350	log10_cb	VSP5	other_antigens	-0.0592651015053423	-0.143920022825196	0.0253898198145115	0.168073803178713	-28.8277306620633	-20.7536870153759	0.00850169507672138	0.042703607482518	ns	ns	0.336147606357426	ns	ns
IgG	treatmentmq	log10_cb_mot_ratio	Measles	vaccine_antigens	-0.0128813628370791	-0.0312875768403757	0.0055248511662176	0.168289064587892	-355.672483630158	-347.490320174021	0.00817498789751003	0.0092887175955995	ns	ns	0.589011726057623	ns	ns
IgG1	hivload	log10_cb_mot_ratio	Measles	vaccine_antigens	-5.6933343203809e-08	-1.38309775787405e-07	2.44430893797871e-08	0.168307393786996	-359.459895848016	-351.441409344631	0.00864557603297833	4.10408542132339e-08	ns	ns	0.504781739357199	ns	ns
IgG1	prematurityYes	log10_cb	MSP1_42_3D7	exposure_antigen	-0.0419898505174283	-0.101834505218385	0.017854804183529	0.168364470845397	-404.064800593143	-392.983604176735	0.00305415401322484	0.0304082803316479	ns	ns	0.351229051765132	ns	ns
IgG3	weight_g	log10_cb_mot_ratio	Pertussis_toxin	vaccine_antigens	2.4018840630301e-05	-1.02209476685897e-05	5.82586289291916e-05	0.168450531667715	-315.876152366191	-304.83563453914	0.00309366884564255	1.73969443658343e-05	ns	ns	0.477750550439216	ns	ns
IgG4	log10_pf_exposure	log10_cb_mot_ratio	HepB	vaccine_antigens	-0.103322375711935	-0.250617436626845	0.0439726852029761	0.168455020543507	-429.695909965818	-418.696629901481	0.00313681996096604	0.0748350081451928	ns	ns	0.400358916143562	ns	ns
IgG3	age	log10_cb_mot_ratio	Tetanus_toxin	vaccine_antigens	-0.00223307941921783	-0.00541714974588069	0.000950990907445027	0.168550146908804	-184.41604834018	-173.365309038164	0.00307999741834175	0.00161782210961303	ns	ns	0.450435546295748	ns	ns
IgG1	mat_anemia_recatabnormal	log10_cb	RSV	other_antigens	0.0120884995724631	-0.00516390566562262	0.0293409048105487	0.168956671864784	-782.757353142956	-771.63602234871	0.00299553737719094	0.00876677937696663	ns	ns	0.50110724286481	ns	ns
IgG4	log10_pf_exposure	log10_cb_mot_ratio	Measles	vaccine_antigens	-0.203464590275167	-0.494039970800041	0.0871107902497074	0.169211354643485	-33.2789104055067	-22.2900289650988	0.00312435955962242	0.147628093400586	ns	ns	0.400358916143562	ns	ns
IgG1	treatmentmq	log10_cb	Rotavirus	other_antigens	-0.0184778204668597	-0.0449363536575792	0.00798071272385973	0.169346475165134	-288.733480256404	-280.272635559588	0.00735431105110096	0.0133655964916237	ns	ns	0.671216079006962	ns	ns
IgG3	age_catbetween_20_30	log10_cb	Tetanus_toxin	vaccine_antigens	-0.05287840228049	-0.128414997363272	0.0226581928022922	0.169352188342587	98.4694815505156	113.324412772553	0.000679746372081458	0.0383843078904464	ns	ns	0.419846895929303	ns	ns
IgG3	age_catbetween_20_30	log10_cb_mot_ratio	HiB	vaccine_antigens	0.0583640288839205	-0.0250358590637186	0.14176391683156	0.169468812638937	144.866559140559	159.600878209914	-4.84468697683482e-05	0.0423747716567775	ns	ns	0.578264601131178	ns	ns
IgG1	haartno	log10_cb	HepB	vaccine_antigens	-0.0813740757766652	-0.198053012401026	0.0353048608476957	0.169818088037975	-25.8454550973357	-17.5589332929424	0.0077702741568374	0.0589047316325015	ns	ns	0.490610682880025	ns	ns
IgG1	seasonrainy	log10_cb_mot_ratio	VSP5	other_antigens	0.0136825352775449	-0.00589130539864303	0.0332563759537329	0.169930321835858	-666.786796847594	-655.818821415134	0.00312409404341818	0.00994427780267976	ns	ns	0.55068594773753	ns	ns
IgG4	haart_2no	log10_cb	Tetanus_toxin	vaccine_antigens	-0.14767552978181	-0.359826203346995	0.0644751437833756	0.169978921919174	80.6445747653281	88.0422991212918	0.0105330128869052	0.106701251258624	ns	ns	0.216336809715312	ns	ns
IgG4	hivload_cat400/999	log10_cb_mot_ratio	Diphteria_toxin	vaccine_antigens	-0.0258558691120175	-0.0629757278098914	0.0112639895858564	0.17000510676257	-276.849507320456	-263.77390473625	0.0331667252747535	0.0187027888621705	ns	ns	0.81783937013913	ns	ns
IgG4	haart_2no	log10_cb_mot_ratio	HepB	vaccine_antigens	-0.0408892530157898	-0.0996867727139157	0.0179082666823361	0.170158191091671	-136.814955226023	-129.668875322001	0.0114718947918495	0.0295339208215633	ns	ns	0.448240206218389	ns	ns
IgG4	weight_g_catlow	log10_cb	Pertussis_toxin	vaccine_antigens	-0.0655919866786661	-0.159541541587831	0.0283575682304983	0.17049150729077	-30.2951524700999	-19.1738216758532	0.00295024548258427	0.0477403010818825	ns	ns	0.238688110207079	ns	ns
IgG3	seasonrainy	log10_cb_mot_ratio	MSP1_42_3D7	exposure_antigen	0.008424905807031	-0.00365066832405198	0.020500479938114	0.170747552359772	-943.068099236843	-932.100123804383	0.00309881100755693	0.00613486467846987	ns	ns	0.774840744563521	ns	ns
IgG	mat_anemia_recatabnormal	log10_cb_mot_ratio	HiB	vaccine_antigens	-0.00389558250250181	-0.00948036051487553	0.00168919550987191	0.170841856219333	-1410.73813628208	-1399.74925484168	0.0030741627771006	0.00283737090369799	ns	ns	0.341683712438666	ns	ns
IgG4	gest_age	log10_cb_mot_ratio	Pertussis_toxin	vaccine_antigens	0.0135030856238585	-0.00586339701569267	0.0328695682634096	0.171014933394577	-185.106830022995	-174.149362482189	0.00310153562217985	0.00983878301716039	ns	ns	0.294826979186005	ns	ns
IgG1	hivload_cat>9999	log10_cb	OSP	other_antigens	0.0512351738028683	-0.0224942553005411	0.124964602906278	0.171263539336948	-170.496079991688	-156.815087749716	-0.00520828573508947	0.0372039160076903	ns	ns	0.459930783933288	ns	ns
IgG3	age_cat>30	log10_cb_mot_ratio	Tetanus_toxin	vaccine_antigens	-0.0403467822116276	-0.0982515959602262	0.0175580315369709	0.171318448414744	-182.476141806911	-167.741822737556	-0.000141395173150594	0.0294209419317878	ns	ns	0.599614569451604	ns	ns
IgG2	malaria_placentariaYes	log10_cb_mot_ratio	Diphteria_toxin	vaccine_antigens	-0.0233872653275852	-0.0569702744797299	0.0101957438245596	0.171509315983175	-733.166318209128	-722.283454868056	0.00316489640276063	0.0170593678327511	ns	ns	0.882944418650265	ns	ns
IgG2	hivload	log10_cb	VSP5	other_antigens	-2.65420014039177e-07	-6.47614993646067e-07	1.16774965567714e-07	0.171553432317391	-29.3944723661041	-21.2123089099671	0.00791643504767159	1.92875147023091e-07	ns	ns	0.600437013110868	ns	ns
IgG4	log10_pf_exposure	log10_cb_mot_ratio	Shiga_toxin	other_antigens	-0.202271930691318	-0.492745976570916	0.0882021151882811	0.171582392632955	-31.702839640005	-20.652100337989	0.0029885843720896	0.147589495670873	ns	ns	0.400358916143562	ns	ns
IgG1	treatmentmq_full	log10_cb_mot_ratio	MSP1_42_3D7	exposure_antigen	-0.0111317405718923	-0.0271399473944119	0.00487646625062741	0.171672668062928	-607.281465901261	-594.622322005567	0.021044849935646	0.00811013462402268	ns	ns	0.480683470576199	ns	ns
IgG3	gest_age	log10_cb_mot_ratio	OSP	other_antigens	0.0213785841485759	-0.00933584080891935	0.0520930091060711	0.171750510562389	78.0541040695363	89.0220795019959	0.00306797041273443	0.0156041310123904	ns	ns	0.30056339348418	ns	ns
IgG3	malaria_placentariaYes	log10_cb	Diphteria_toxin	vaccine_antigens	0.0479161032534947	-0.0209782716158642	0.116810478122854	0.172116659026649	-291.334482219267	-280.233151499095	0.00292242065218784	0.0350075973609527	ns	ns	0.803211075457694	ns	ns
IgG1	haartno	log10_cb_mot_ratio	Measles	vaccine_antigens	-0.0157076668987822	-0.0383811933271071	0.00696585952954261	0.172587558413034	-402.391195927471	-394.209032471334	0.00783569020200403	0.0114422218415667	ns	ns	0.604056454445619	ns	ns
IgG1	hivload_cat400/999	log10_cb	MSP1_42_3D7	exposure_antigen	-0.0500764016639318	-0.122418473161559	0.0222656698336957	0.172913610801768	-144.245111643834	-130.564119401861	-0.00121749294981743	0.0365038544926914	ns	ns	0.503678765434991	ns	ns
IgG	hivload_cat400/999	log10_cb	Cp17	other_antigens	-0.0331527120317055	-0.0810638822773567	0.0147584582139456	0.173034279934126	-235.127458133969	-221.534963777493	0.0601034108961008	0.0241710277375419	ns	ns	0.804069954276978	ns	ns
IgG	age	log10_cb_mot_ratio	MSP1_42_3D7	exposure_antigen	-0.000407353940308733	-0.000994748362606436	0.000180040481988969	0.173334381714726	-1167.7303187363	-1156.71034893479	0.00296721855443793	0.000298441470214545	ns	ns	0.60667033600154	ns	ns
IgG3	gest_age	log10_cb	Cp17	other_antigens	-0.00795758739489438	-0.0194400660167864	0.00352489122699767	0.173637034628912	-487.433151026865	-476.372224957846	0.00291765272354183	0.0058343157466602	ns	ns	0.405153080800794	ns	ns
IgG1	hivload_cat>9999	log10_cb_mot_ratio	Shiga_toxin	other_antigens	-0.00787059615394464	-0.0192782798851311	0.00353708757724186	0.174186353633099	-565.665049664305	-552.300905491995	-0.00924648338285472	0.00575197396738576	ns	ns	0.444165248418884	ns	ns
IgG4	mat_anemiaabnormal	log10_cb_mot_ratio	Measles	vaccine_antigens	0.0379984023050306	-0.016958466205844	0.0929552708159052	0.174604490648202	-31.0317393124787	-20.0637638800191	0.00298132696366427	0.0279202419534516	ns	ns	0.407410478179137	ns	ns
IgG	log10_pf_exposure	log10_cb	Diphteria_toxin	vaccine_antigens	0.0804276338876175	-0.0360103910575095	0.196865658832745	0.175030222461021	-573.219443289184	-562.261975748378	0.00297907746297676	0.0591541832197344	ns	ns	0.415692029958893	ns	ns
IgG4	hivload_cat400/999	log10_cb_mot_ratio	Rotavirus	other_antigens	-0.0973788139670677	-0.238879267010817	0.0441216390766817	0.175251293601242	-2.09369494114944	11.2235005294109	0.0500812163191331	0.0713389419172457	ns	ns	0.81783937013913	ns	ns
IgG3	hivload_cat>9999	log10_cb_mot_ratio	VSP5	other_antigens	0.0730886666327004	-0.033113533364109	0.17929086662951	0.175262320733968	-88.2187052177233	-74.8545610454137	0.0106349403546784	0.0535491957925457	ns	ns	0.613418122568888	ns	ns
IgG4	haart_2no	log10_cb_mot_ratio	OSP	other_antigens	-0.1526635854708	-0.374961509027867	0.0696343380862667	0.17551957413173	77.1164822291156	84.2998296931329	0.0107401648921894	0.111682232700192	ns	ns	0.448240206218389	ns	ns
IgG1	prematurityYes	log10_cb	HepB	vaccine_antigens	-0.0649823690689378	-0.159183517901625	0.0292187797637494	0.175614525882566	-132.591187699773	-121.560926292968	0.00288972909472773	0.0478621109427582	ns	ns	0.351229051765132	ns	ns
IgG4	age_cat>30	log10_cb_mot_ratio	Tetanus_toxin	vaccine_antigens	-0.0342114495929891	-0.0839544543504226	0.0155315551644443	0.176894121210696	-272.881052083608	-258.215345331158	-0.000290975096031154	0.0252721512025261	ns	ns	0.225137972449977	ns	ns
IgG	hivload_cat400/999	log10_cb	OSP	other_antigens	0.0216848370269284	-0.00994968297366092	0.0533193570275178	0.177040747821553	-325.151512905319	-311.603861898757	0.0424004081076835	0.0159578215175331	ns	ns	0.804069954276978	ns	ns
IgG1	graviditymultigravidae	log10_cb_mot_ratio	Pneumo	other_antigens	-0.0084765944899817	-0.0208177176559194	0.00386452867595598	0.177471537681841	-963.005913213996	-951.985943412482	0.00284557961962106	0.00627023819418318	ns	ns	0.354943075363683	ns	ns
IgG4	cd4_cells_cat<350	log10_cb_mot_ratio	Tetanus_toxin	vaccine_antigens	-0.0444733285075473	-0.109500661492603	0.0205540044775086	0.177854286744164	-86.6748464860694	-78.8294849355456	0.00834536130329844	0.0327722898108825	ns	ns	0.9690836781749	ns	ns
IgG2	prematurityYes	log10_cb_mot_ratio	Pertussis_toxin	vaccine_antigens	0.017378348673922	-0.00794850692245528	0.0427052042702993	0.177884418924763	-885.502979679192	-874.577258466378	0.00292512330328931	0.012866248118661	ns	ns	0.449004185862147	ns	ns
IgG2	hivload_cat400/999	log10_cb_mot_ratio	Pertussis_toxin	vaccine_antigens	0.0225369502407332	-0.0104261922210702	0.0555000927025365	0.178034385203817	-307.995488231765	-294.725686480977	0.0129483649597898	0.0166167400785141	ns	ns	0.988624528188025	ns	ns
IgG	log10_pf_exposure	log10_cb	Shiga_toxin	other_antigens	-0.0500225744503798	-0.122965297206215	0.0229201483054555	0.17815372712524	-846.590472086238	-835.560210679433	0.00281604683236647	0.0370610415294131	ns	ns	0.415692029958893	ns	ns
IgG1	weight_g_catlow	log10_cb	OSP	other_antigens	-0.0312123246711936	-0.0767438643249988	0.0143192149826117	0.178348781159356	-467.819342314742	-456.688061262618	0.00271634642169305	0.0231370852085985	ns	ns	0.624220734057744	ns	ns
IgG1	weight_g	log10_cb	HiB	vaccine_antigens	2.88208130934264e-05	-1.32463868069544e-05	7.08880129938072e-05	0.178599139723742	-193.829295271491	-182.698014219366	0.00270939543224302	2.13766632093433e-05	ns	ns	0.500077591226478	ns	ns
IgG	treatmentmq_full	log10_cb	Tetanus_toxin	vaccine_antigens	-0.0163749411046706	-0.040311263674574	0.00756138146523275	0.178687204426229	-462.338536177254	-449.67939228156	-0.000614456105608063	0.0121267047957464	ns	ns	0.50032417239344	ns	ns
IgG1	cd4_cells_cat<350	log10_cb	Rotavirus	other_antigens	0.0210897731599141	-0.00981187960227997	0.0519914259221082	0.178946588883545	-248.72123022514	-240.619789127763	0.00755761485530659	0.0155897821368427	ns	ns	0.626313061092407	ns	ns
IgG3	age_catbetween_20_30	log10_cb_mot_ratio	MSP1_42_3D7	exposure_antigen	-0.00855799586466803	-0.0210613629633456	0.00394537123400959	0.178992737843823	-970.951046909388	-956.216727840033	-0.000625470144510087	0.00635285416786135	ns	ns	0.578264601131178	ns	ns
IgG1	log10_pf_exposure	log10_cb	Cp17	other_antigens	-0.089264888102246	-0.219749904042265	0.041220127837773	0.179219950118836	-502.253267436508	-491.202528134492	0.00276630119128307	0.0662992717193597	ns	ns	0.418179883610618	ns	ns
IgG2	mat_anemia_recatabnormal	log10_cb	OSP	other_antigens	-0.0333239429713107	-0.0820407676629407	0.0153928817203194	0.179270223863376	-157.026562962862	-145.945366546454	0.00273663057632234	0.0247540046724864	ns	ns	0.983731998679191	ns	ns
IgG3	prematurityYes	log10_cb_mot_ratio	Rotavirus	other_antigens	0.0176533765342884	-0.00817055550396897	0.0434773085725458	0.179518073961564	-892.819813566286	-881.830932125878	0.00281597218349594	0.0131199616568614	ns	ns	0.628313258865475	ns	ns
IgG3	hemoglobin	log10_cb	Shiga_toxin	other_antigens	-0.00712259922251973	-0.0175425487715433	0.00329735032650382	0.179584391993184	-292.009108266312	-280.887777472065	0.00269115954145416	0.00529487903598238	ns	ns	0.715793503968716	ns	ns
IgG3	age_catbetween_20_30	log10_cb	Shiga_toxin	other_antigens	0.0271622582924018	-0.0126063839869258	0.0669309005717294	0.179934383969701	-290.302863138201	-275.447931916163	-0.000630982501422794	0.020208639374886	ns	ns	0.419846895929303	ns	ns
IgG1	hivload	log10_cb_mot_ratio	MSP1_42_3D7	exposure_antigen	-5.52429299788327e-08	-1.3644880108798e-07	2.59629411303149e-08	0.180279192627571	-359.908901282103	-351.890414778718	0.00767147001310864	4.09548343622158e-08	ns	ns	0.504781739357199	ns	ns
IgG4	hivload	log10_cb_mot_ratio	Shiga_toxin	other_antigens	3.13270442176374e-07	-1.47639128097453e-07	7.74180012450201e-07	0.180662834739739	11.6409621224397	19.6594486258255	0.00764148273584697	2.32452097966575e-07	ns	ns	0.323248469242502	ns	ns
IgG4	log10_pf_exposure	log10_cb	Tetanus_toxin	vaccine_antigens	0.329498728345118	-0.15379177750674	0.812789234196976	0.180688462170692	265.766971119006	276.797232525811	0.00274368859054708	0.245552247454512	ns	ns	0.614682068426727	ns	ns
IgG4	haart_2no	log10_cb_mot_ratio	Shiga_toxin	other_antigens	-0.0969628048638874	-0.23995085038195	0.0460252406541753	0.18098362364818	5.89411544587806	13.1142731876708	0.010035862768492	0.0718509993153532	ns	ns	0.448240206218389	ns	ns
IgG2	hemoglobin	log10_cb	OSP	other_antigens	0.00892101704815509	-0.00419079345367753	0.0220328275499877	0.181596868820161	-157.00724385955	-145.926047443142	0.0026717589915175	0.00666237630390728	ns	ns	0.50214154495553	ns	ns
IgG1	cd4_cells	log10_cb_mot_ratio	MSP1_42_3D7	exposure_antigen	2.14768498106871e-05	-1.0198601226993e-05	5.31523008483673e-05	0.181629382920196	-344.74722531661	-336.843038351921	0.00786986693169955	1.5967614051747e-05	ns	ns	0.50856227217655	ns	ns
IgG3	weight_g	log10_cb_mot_ratio	HiB	vaccine_antigens	5.1019135738592e-05	-2.39767827205054e-05	0.000126015054197689	0.181642751712458	143.574406979296	154.614924806347	0.00270736938560445	3.8104786446353e-05	ns	ns	0.477750550439216	ns	ns
IgG3	haartno	log10_cb_mot_ratio	Pertussis_toxin	vaccine_antigens	-0.0495406222680742	-0.122624325236535	0.0235430807003862	0.181938158204712	-137.879125103575	-129.696961647438	0.00712969973062783	0.0368817768604189	ns	ns	0.363876316409423	ns	ns
IgG	hivload_cat1000/9999	log10_cb	Shiga_toxin	other_antigens	-0.021246979816052	-0.0526120080179732	0.0101180483858693	0.182170237306441	-320.434048884743	-306.841554528267	-0.000923687686632757	0.0158235535214512	ns	ns	0.425063887048361	ns	ns
IgG4	hivload	log10_cb_mot_ratio	Pertussis_toxin	vaccine_antigens	2.39181258336846e-07	-1.14056284488196e-07	5.92418801161889e-07	0.182301029010389	-45.2961148521623	-37.2776283487766	0.00751424782536114	1.78149496573605e-07	ns	ns	0.323248469242502	ns	ns
IgG3	treatmentmq_split	log10_cb_mot_ratio	Pneumo	other_antigens	-0.0195860624852027	-0.0485080825222841	0.00933595755187863	0.183094455554574	-398.086759890622	-385.404823910469	0.0266619278009992	0.014653176635288	ns	ns	0.583051034366799	ns	ns
IgG	haartno	log10_cb	MSP1_42_3D7	exposure_antigen	-0.0410676594344761	-0.10184750807636	0.0197121892074081	0.183426671317819	-186.844289681322	-178.532235807925	0.00671493756253017	0.0306871911034298	ns	ns	0.472605378215759	ns	ns
IgG	log10_pf_exposure	log10_cb_mot_ratio	Cp17	other_antigens	0.025580079318879	-0.0122067701746607	0.0633669288124188	0.183775708981419	-1228.78778915704	-1217.7885090927	0.00268503207308524	0.0191980584553597	ns	ns	0.380099863831065	ns	ns
IgG4	malaria_placentariaYes	log10_cb	Pertussis_toxin	vaccine_antigens	-0.0739259614641313	-0.183123864151215	0.0352719412229524	0.18378852569981	-31.1376559521537	-20.0063749000291	0.00256779259254258	0.0554894738522234	ns	ns	0.662389297629748	ns	ns
IgG3	age	log10_cb_mot_ratio	Cp17	other_antigens	0.000166903465468658	-7.96708200533932e-05	0.00041347775099071	0.183833232012001	-1688.66841544798	-1677.61767614597	0.00263724856817371	0.00012528408290457	ns	ns	0.450435546295748	ns	ns
IgG3	hivload	log10_cb_mot_ratio	HiB	vaccine_antigens	4.40726727727919e-07	-2.12697049612415e-07	1.09415050506825e-06	0.18398661123077	86.3321034407026	94.3505899440883	0.00738469084834659	3.29543445612914e-07	ns	ns	0.299077545847796	ns	ns
IgG2	treatmentmq	log10_cb_mot_ratio	VSP5	other_antigens	0.0276459092588615	-0.0133690199108301	0.068660838428553	0.184445523678447	-175.916150753029	-167.65538017971	0.00676237102819055	0.0207042345452831	ns	ns	0.969901977554103	ns	ns
IgG4	hivload	log10_cb_mot_ratio	RSV	other_antigens	1.41931572397393e-07	-6.88799337476245e-08	3.52743078542411e-07	0.184713410995715	-151.785191264554	-143.85201856713	0.00754774487764742	1.06282838456473e-07	ns	ns	0.323248469242502	ns	ns
IgG	treatmentmq	log10_cb	Cp17	other_antigens	0.0204148815545747	-0.00989645684714497	0.0507262199562943	0.184894865788412	-252.876367707244	-244.464304573044	0.00639039807743369	0.0153092948741589	ns	ns	0.708612061196668	ns	ns
IgG	gest_age	log10_cb_mot_ratio	Cp17	other_antigens	0.0021869394818275	-0.00105548102335048	0.00542935998700547	0.185358885493172	-1189.01582849885	-1178.10076449085	0.00271694227622232	0.00164715029478425	ns	ns	0.653672533843265	ns	ns
IgG	hemoglobin	log10_cb_mot_ratio	MSP1_42_3D7	exposure_antigen	0.00157308637556396	-0.000760086932737149	0.00390625968386507	0.185545245772569	-1157.79895524855	-1146.79967518421	0.0026356570000361	0.00118539645828128	ns	ns	0.324704180101997	ns	ns
IgG	log10_pf_exposure	log10_cb_mot_ratio	Diphteria_toxin	vaccine_antigens	-0.0256119404788595	-0.0636235174598408	0.0123996365021219	0.185809766133572	-1204.12250322421	-1193.18616253128	0.00268473098380062	0.019310487790659	ns	ns	0.380099863831065	ns	ns
IgG4	hivload_cat1000/9999	log10_cb_mot_ratio	Pneumo	other_antigens	-0.0390999516755323	-0.0973644630077403	0.0191645596566757	0.186085605918952	-178.651800890371	-165.429846394664	0.0324797768010332	0.0293676148010269	ns	ns	0.805235149417467	ns	ns
IgG2	cd4_cells	log10_cb	VSP5	other_antigens	9.83211025826704e-05	-4.83338627171413e-05	0.000244976067882482	0.186662257720058	-28.6677926064362	-20.5937489597487	0.00704578029999292	7.39791139827884e-05	ns	ns	0.957539142124719	ns	ns
IgG4	age_catbetween_20_30	log10_cb_mot_ratio	Measles	vaccine_antigens	0.0420682397325663	-0.0204912627679326	0.104627742233065	0.186696081475913	-32.0869825008553	-17.4351405803115	0.00242946994585669	0.031783155060169	ns	ns	0.261374514066279	ns	ns
IgG	hivload_cat>9999	log10_cb_mot_ratio	Pertussis_toxin	vaccine_antigens	-0.011200616894545	-0.0279199152599544	0.00551868147086444	0.186814225416278	-469.222914270665	-456.049269329516	0.0404373031140139	0.00842614430445322	ns	ns	0.620673217981292	ns	ns
IgG2	haartno	log10_cb_mot_ratio	HepB	vaccine_antigens	0.0211335945449592	-0.0104240416091762	0.0526912306990947	0.186970138308646	-307.70894680837	-299.863585257847	0.0075987841160261	0.0159043274622286	ns	ns	0.684267253819175	ns	ns
IgG2	treatmentmq_split	log10_cb	Measles	vaccine_antigens	-0.0415075261343493	-0.10338648119796	0.0203714289292611	0.187225215295573	-132.704687910001	-120.114710002747	0.00828157212155312	0.0313453933639196	ns	ns	0.438517958652595	ns	ns
IgG3	treatmentmq_full	log10_cb_mot_ratio	Cp17	other_antigens	0.00257724659132579	-0.00126596090334586	0.00642045408599744	0.187380107928633	-1110.88443810837	-1098.20250212822	0.00399859812355086	0.00194713917607704	ns	ns	0.874440503666952	ns	ns
IgG	graviditymultigravidae	log10_cb_mot_ratio	Rotavirus	other_antigens	-0.00474907690296387	-0.0118261771423546	0.0023280233364269	0.187622889628958	-1282.53650421441	-1271.52686144547	0.00256937680051006	0.0035956578432613	ns	ns	0.437596187980104	ns	ns
IgG4	gest_age	log10_cb_mot_ratio	OSP	other_antigens	0.0262891155277407	-0.0129015779012646	0.0654798089567459	0.187762707468295	208.797541887798	219.723263100613	0.0026392492392816	0.0199091902143621	ns	ns	0.294826979186005	ns	ns
IgG	hivload_cat1000/9999	log10_cb_mot_ratio	Tetanus_toxin	vaccine_antigens	-0.0126978859294989	-0.0316978656490075	0.00630209379000975	0.187913821416604	-416.45118411087	-403.181382360082	0.00750312800806485	0.00957790128359143	ns	ns	0.436983125372463	ns	ns
IgG4	age	log10_cb_mot_ratio	Shiga_toxin	other_antigens	0.00276917715855549	-0.00136012568760174	0.00689848000471273	0.187917561303163	-31.5664861113607	-20.5157468093447	0.00252607568321894	0.00209809355838029	ns	ns	0.239167805294935	ns	ns
IgG2	treatmentmq_split	log10_cb	Tetanus_toxin	vaccine_antigens	0.0276647194445546	-0.0136443890474441	0.0689738279365533	0.187936267993969	-270.72374688286	-258.133768975607	0.0101964349849971	0.0209255352464088	ns	ns	0.438517958652595	ns	ns
IgG	hivload_cat>9999	log10_cb	Measles	vaccine_antigens	0.0420983581923093	-0.0209211068922178	0.105117823276836	0.188253946390818	-202.607044703159	-189.014550346684	-0.00119535075010879	0.0317931127700105	ns	ns	0.439259208245243	ns	ns
IgG2	graviditymultigravidae	log10_cb	OSP	other_antigens	0.0326066802974905	-0.0160563782204667	0.0812697388154477	0.188302968822708	-158.091642015208	-146.990311295036	0.0024731657467485	0.0247273708801268	ns	ns	0.908799055287337	ns	ns
IgG4	malaria_placentariaYes	log10_cb	HiB	vaccine_antigens	-0.127080172184198	-0.316832864821833	0.0626725204534364	0.188531337835654	302.608432842243	313.739713894368	0.0024423559482819	0.0964238031812533	ns	ns	0.662389297629748	ns	ns
IgG1	hivload_cat400/999	log10_cb	Tetanus_toxin	vaccine_antigens	-0.0360115683082733	-0.0899607342339376	0.0179375976173909	0.188629833220429	-211.132019339039	-197.451027097066	0.00633620203267071	0.0272227828452092	ns	ns	0.503678765434991	ns	ns
IgG1	mat_anemia_recatabnormal	log10_cb	VSP5	other_antigens	0.0301213791649196	-0.014933044046249	0.0751758023760882	0.189292707794343	-204.885756427439	-193.764425633193	0.00243070298415238	0.0228943259098073	ns	ns	0.50110724286481	ns	ns
IgG4	gest_age	log10_cb_mot_ratio	HiB	vaccine_antigens	0.0259327882836993	-0.0128819379508102	0.0647475145182087	0.189531629476718	208.899815014268	219.836155707198	0.00258062755777611	0.0197185004301265	ns	ns	0.294826979186005	ns	ns
IgG2	log10_pf_exposure	log10_cb	Cp17	other_antigens	-0.0873976175434394	-0.218209816248269	0.0434145811613905	0.189550503163553	-496.521363567496	-485.522083503159	0.00252588303495849	0.0664606938940174	ns	ns	0.422597308113222	ns	ns
IgG4	hivload_cat>9999	log10_cb_mot_ratio	Tetanus_toxin	vaccine_antigens	0.0689024842846075	-0.0347266042875966	0.172531572856812	0.190183792374134	-92.5639910943699	-79.2467956238096	0.00490844474725483	0.0522456951307701	ns	ns	0.581270651046693	ns	ns
IgG4	haartno	log10_cb_mot_ratio	Measles	vaccine_antigens	-0.0881780185431237	-0.220767478496326	0.0444114414100788	0.190213823336905	-3.56232461846701	4.53911647891024	0.00672279877728554	0.0668909462616489	ns	ns	0.443832254452778	ns	ns
IgG1	hivload_cat>9999	log10_cb_mot_ratio	Rotavirus	other_antigens	-0.0141166359403924	-0.0353552588638739	0.00712198698308903	0.190356535036665	-432.656726520837	-419.292582348528	-0.00661711529427622	0.0107089229538345	ns	ns	0.444165248418884	ns	ns
IgG3	treatmentmq_split	log10_cb_mot_ratio	HepB	vaccine_antigens	0.0134647794019849	-0.00679171580235352	0.0337212746063232	0.191244378542617	-519.584567087743	-506.948345890885	0.00652772621391806	0.010261992384412	ns	ns	0.583051034366799	ns	ns
IgG3	hivload_cat1000/9999	log10_cb	Tetanus_toxin	vaccine_antigens	-0.0817394209073343	-0.204985992731147	0.0415071509164788	0.19146464634404	-13.4300301458133	0.250962096159217	0.013552674599547	0.0621902971734373	ns	ns	0.982726206867609	ns	ns
IgG1	treatmentmq	log10_cb	MSP1_42_3D7	exposure_antigen	-0.0298684550263379	-0.0749140352181791	0.0151771251655033	0.191776022573418	-156.773635524874	-148.312790828059	0.00584340298927977	0.0227548913704107	ns	ns	0.671216079006962	ns	ns
IgG4	haart_2no	log10_cb_mot_ratio	HiB	vaccine_antigens	-0.15859990546432	-0.398528618969828	0.081328808041188	0.192102945522167	90.7773704458729	97.9975281876657	0.00893808710222088	0.120563350365119	ns	ns	0.448240206218389	ns	ns
IgG	mat_anemiaabnormal	log10_cb	RSV	other_antigens	-0.00661576519842873	-0.0165751952312884	0.00334366483443092	0.192122177455727	-1032.77612440161	-1021.70504603864	0.00239800328939677	0.00506051707879354	ns	ns	0.448285080730029	ns	ns
IgG3	malaria_placentariaYes	log10_cb_mot_ratio	HepB	vaccine_antigens	-0.01924453230009	-0.0482209367808722	0.00973187218069224	0.192189707588915	-800.075849064746	-789.066206295805	0.00244643848337611	0.0147220235006599	ns	ns	0.878898298972673	ns	ns
IgG2	hivload_cat>9999	log10_cb	Diphteria_toxin	vaccine_antigens	-0.0615137980280006	-0.154450105201435	0.0314225091454337	0.192265183050882	-120.136764542383	-106.634362713421	0.0230749653897359	0.0468760393074863	ns	ns	0.719251964778656	ns	ns
IgG4	graviditymultigravidae	log10_cb	Shiga_toxin	other_antigens	0.0455356978562834	-0.0231400666971091	0.114211462409676	0.19295518435579	49.8383041031005	60.9795025196286	0.00232083231588542	0.0348984112882955	ns	ns	0.337638686750813	ns	ns
IgG2	haart_2no	log10_cb_mot_ratio	Rotavirus	other_antigens	0.0301201050398874	-0.0155841488600081	0.0758243589397829	0.193441973633717	-181.159307526852	-173.939149785059	0.00881081787521465	0.0229662298255227	ns	ns	0.677046907718009	ns	ns
IgG2	age_catbetween_20_30	log10_cb	Rotavirus	other_antigens	0.021508878273696	-0.0109730843035682	0.0539908408509602	0.193530313948535	-411.860043265325	-397.0449133667	-0.000392319767197558	0.0165052004543863	ns	ns	0.617661911815008	ns	ns
IgG1	haart_2no	log10_cb_mot_ratio	MSP1_42_3D7	exposure_antigen	0.0173481778219784	-0.00899813213905406	0.043694487783011	0.193813310330367	-271.500864285188	-264.280706543395	0.0087757031663025	0.0132389298148222	ns	ns	0.719258354446297	ns	ns
IgG3	graviditymultigravidae	log10_cb	MSP1_42_3D7	exposure_antigen	0.0206475815244713	-0.0105569049716901	0.0518520680206326	0.193871926667381	-428.195392237117	-417.054193820589	0.00229771687740987	0.0158569330951745	ns	ns	0.452367828890557	ns	ns
IgG1	malaria_placentariaYes	log10_cb	Shiga_toxin	other_antigens	0.0150129060702139	-0.0077024649201133	0.0377282770605411	0.19439126632428	-967.3578285861	-956.216630169571	0.00228467823805789	0.0115430875002541	ns	ns	0.696621081364725	ns	ns
IgG2	graviditymultigravidae	log10_cb	HepB	vaccine_antigens	-0.0277963864430682	-0.069891939406443	0.0142991665203065	0.194742654704429	-251.161064844226	-240.20359730342	0.00242145685193695	0.0213858664633397	ns	ns	0.908799055287337	ns	ns
IgG4	seasonrainy	log10_cb_mot_ratio	HiB	vaccine_antigens	0.0607391718312968	-0.03140711005744	0.152885453720034	0.195516877313804	208.945927371907	219.882268064837	0.00241809361386125	0.0468117819015342	ns	ns	0.341292770840117	ns	ns
IgG	hemoglobin	log10_cb	Pertussis_toxin	vaccine_antigens	0.00351300139784744	-0.00181987367641225	0.00884587647210713	0.195836424182715	-685.678224463584	-674.607146100612	0.00230244332052709	0.00270970379864346	ns	ns	0.342713742319751	ns	ns
IgG4	prematurityYes	log10_cb	RSV	other_antigens	-0.0797251359935231	-0.200884575687808	0.0414343037007623	0.196313865140318	-2.30053435490818	8.7194354466063	0.00233016244005158	0.0615582987173939	ns	ns	0.229032842663704	ns	ns
IgG	hivload	log10_cb_mot_ratio	Pertussis_toxin	vaccine_antigens	-2.96575564476299e-08	-7.49035142382247e-08	1.55884013429649e-08	0.196462854552288	-467.60641088629	-459.702223921601	0.00672640578871808	2.28085147246183e-08	ns	ns	0.501190742808722	ns	ns
IgG1	seasonrainy	log10_cb_mot_ratio	RSV	other_antigens	0.00749341182255147	-0.00390407453592916	0.0188908981810321	0.196673552763404	-973.081976240834	-962.124508700028	0.0023703811566621	0.00579028196855551	ns	ns	0.55068594773753	ns	ns
IgG3	hivload	log10_cb_mot_ratio	OSP	other_antigens	3.92177575807771e-07	-2.06541112547542e-07	9.90896264163083e-07	0.196857704646809	67.6212196629589	75.6397061663446	0.00643828749438535	3.0195384122162e-07	ns	ns	0.299077545847796	ns	ns
IgG	weight_g_catlow	log10_cb_mot_ratio	Shiga_toxin	other_antigens	-0.00532004192187803	-0.0134293557146879	0.00278927187093186	0.197657846295832	-1455.89672282375	-1444.87675302224	0.00229561275237766	0.00412015408878141	ns	ns	0.95294454184857	ns	ns
IgG2	hivload	log10_cb_mot_ratio	Measles	vaccine_antigens	-6.03956268366382e-08	-1.52887466260999e-07	3.20962125877228e-08	0.198178773884289	-323.709109513417	-315.775936815993	0.00653483337052407	4.66307338144963e-08	ns	ns	0.553683518459165	ns	ns
IgG	cd4_cells_cat<350	log10_cb_mot_ratio	Pneumo	other_antigens	0.00906204891047576	-0.00482201455881289	0.0229461123797644	0.198276739304873	-395.102405175298	-387.286894617334	0.00679865423975501	0.00699636743235353	ns	ns	0.943876827099797	ns	ns
IgG	hivload_cat>9999	log10_cb_mot_ratio	Tetanus_toxin	vaccine_antigens	-0.0144006324570038	-0.0364701238939734	0.00766885897996579	0.198475352484452	-416.45118411087	-403.181382360082	0.00750312800806485	0.0111252439993566	ns	ns	0.620673217981292	ns	ns
IgG	age_catbetween_20_30	log10_cb_mot_ratio	Pertussis_toxin	vaccine_antigens	-0.00392832328041126	-0.0099311284372525	0.00207448187642997	0.198753266319946	-1375.4495344703	-1360.81160560726	-9.4017093035248e-06	0.00304966015931694	ns	ns	0.347818216059906	ns	ns
IgG	weight_g	log10_cb	VSP5	other_antigens	1.35618903211438e-05	-7.16455093428236e-06	3.42883315765701e-05	0.198850552871738	-615.798057507847	-604.696726787675	0.00220381862167252	1.05318164446849e-05	ns	ns	0.954316016513386	ns	ns
IgG	haart_2no	log10_cb	MSP1_42_3D7	exposure_antigen	-0.0422391149281407	-0.107122990695704	0.0226447608394222	0.199013937647891	-128.973647297148	-121.610605408388	0.00788934766483995	0.032627758400792	ns	ns	0.53888303245398	ns	ns
IgG2	motHIV+	log10_cb	Measles	vaccine_antigens	-0.0234426843730665	-0.0593601777465078	0.0124748090003748	0.19996544767717	-261.02072607548	-249.969986773464	0.00221380952863282	0.0182496329980043	ns	ns	0.39993089535434	ns	ns
IgG2	seasonrainy	log10_cb_mot_ratio	OSP	other_antigens	0.0164821158630817	-0.00880427450612674	0.0417685062322902	0.200526409847814	-520.570365391206	-509.634024698277	0.00228645031739527	0.0128458898913547	ns	ns	0.557878970538483	ns	ns
IgG1	cd4_cells_cat<350	log10_cb_mot_ratio	Rotavirus	other_antigens	-0.00814873014494956	-0.0207062958225669	0.00440883553266781	0.200944797006817	-426.216873687637	-418.312686722949	0.00640039669931558	0.00633027646334486	ns	ns	0.608544716357413	ns	ns
IgG4	hivload_cat400/999	log10_cb	HepB	vaccine_antigens	0.043768484675632	-0.0237591395707807	0.111296108922045	0.201646557520085	-159.695069970475	-146.058130876914	-0.00936524249265158	0.0340710049968534	ns	ns	0.903177260357072	ns	ns
IgG4	treatmentmq_full	log10_cb_mot_ratio	Diphteria_toxin	vaccine_antigens	0.0220818937571597	-0.0119735428584271	0.0561373303727464	0.202298665879039	-338.247918942507	-325.634752564516	-0.000629843320468559	0.0172518482158426	ns	ns	0.827458358011964	ns	ns
IgG	haartno	log10_cb	Cp17	other_antigens	0.0311034549700837	-0.0169655077911593	0.0791724177313266	0.202545162092468	-242.214985682175	-233.902931808778	0.00546105682414355	0.0242695807797948	ns	ns	0.472605378215759	ns	ns
IgG	mat_anemia_recatabnormal	log10_cb	Pneumo	other_antigens	-0.00917354002422985	-0.0233114289446114	0.00496434889615171	0.202605829378238	-889.233148101271	-878.172222032251	0.00214092761073104	0.00718354552783162	ns	ns	0.567268505833952	ns	ns
IgG3	haart_2no	log10_cb	RSV	other_antigens	-0.0870678494935465	-0.221905312728552	0.0477696137414592	0.202675047409682	1.78313426343274	9.18085861939649	0.00748231956716128	0.0678165466172473	ns	ns	0.405350094819364	ns	ns
IgG1	age	log10_cb_mot_ratio	HepB	vaccine_antigens	-0.000883153844044991	-0.00224528509460314	0.000478977406513162	0.20292597987994	-677.655435368067	-666.687459935607	0.00220110041766153	0.000692016032180142	ns	ns	0.329610572442131	ns	ns
IgG4	mat_anemia_recatabnormal	log10_cb_mot_ratio	RSV	other_antigens	0.0180254382863485	-0.009834102624683	0.04588497919738	0.203852951610287	-479.531034261732	-468.605313048918	0.00220905255507564	0.0141528728060735	ns	ns	0.924215478619293	ns	ns
IgG2	weight_g	log10_cb	RSV	other_antigens	-1.14488486815076e-05	-2.91595627484423e-05	6.26186538542708e-06	0.204299953055559	-708.314681639587	-697.233485223179	0.00208524265421084	8.99917228885598e-06	ns	ns	0.260018122070711	ns	ns
IgG	gest_age	log10_cb_mot_ratio	Pneumo	other_antigens	-0.00193284188144538	-0.00492586909130306	0.00106018532841231	0.204704817913686	-1230.43009221145	-1219.52572340194	0.00220323105305931	0.00152043462211713	ns	ns	0.653672533843265	ns	ns
IgG4	hivload	log10_cb	MSP1_42_3D7	exposure_antigen	-1.42713718714882e-07	-3.6449843324147e-07	7.90709958117049e-08	0.204916864937644	-160.002071517631	-151.846574903746	0.00560975069708358	1.11912705569222e-07	ns	ns	0.862964663593065	ns	ns
IgG3	mat_anemiaabnormal	log10_cb_mot_ratio	Measles	vaccine_antigens	0.00867683907022776	-0.00476630742868942	0.0221199855691449	0.204973557098844	-847.027201217574	-836.007231416059	0.00211224479730088	0.00683015066733644	ns	ns	0.593335414559811	ns	ns
IgG1	prematurityYes	log10_cb_mot_ratio	Shiga_toxin	other_antigens	0.00584028127633558	-0.00321999381902732	0.0149005563716985	0.205555515613882	-1496.1234675388	-1485.13458609839	0.00212013656803056	0.00460311240269972	ns	ns	0.886544098827234	ns	ns
IgG1	haartno	log10_cb	MSP1_42_3D7	exposure_antigen	-0.0443721909778442	-0.113415899767239	0.0246715178115507	0.205641374970661	-152.029312997346	-143.666837769	0.00518023567342352	0.0348657659646263	ns	ns	0.490610682880025	ns	ns
IgG3	prematurityYes	log10_cb	Cp17	other_antigens	0.0333804789079768	-0.0184448433954216	0.0852058012113752	0.205938568521293	-489.52550458572	-478.444308169312	0.00204588440049003	0.0263334952261749	ns	ns	0.480523326549684	ns	ns
IgG3	log10_pf_exposure	log10_cb_mot_ratio	OSP	other_antigens	-0.232953644730711	-0.59481956467338	0.128912275211958	0.206167914301312	97.5157622028435	108.56650150486	0.00206150093451041	0.18386361667215	ns	ns	0.544507643857816	ns	ns
IgG1	hivload_cat>9999	log10_cb	MSP1_42_3D7	exposure_antigen	-0.0529650848943943	-0.135691408602638	0.029761238813849	0.207185573188861	-144.245111643834	-130.564119401861	-0.00121749294981743	0.041743754648497	ns	ns	0.459930783933288	ns	ns
IgG	prematurityYes	log10_cb	Shiga_toxin	other_antigens	-0.0178129627256124	-0.0455975542233207	0.00997162877209584	0.208037531079964	-854.144626316397	-843.083700247378	0.00200971615291234	0.0141175163505673	ns	ns	0.419651453867655	ns	ns
IgG1	malaria_placentariaYes	log10_cb_mot_ratio	RSV	other_antigens	-0.0131911637897883	-0.0337781053571397	0.00739577777756317	0.208283054410657	-1008.47916356556	-997.43864573851	0.00201774281931999	0.0104600494016927	ns	ns	0.50025305702564	ns	ns
IgG4	seasonrainy	log10_cb_mot_ratio	RSV	other_antigens	0.017618624897842	-0.00991709285343275	0.0451543426491167	0.208871360519959	-472.655446559004	-461.794243961852	0.00212888171794723	0.0139870383650113	ns	ns	0.341292770840117	ns	ns
IgG1	age	log10_cb_mot_ratio	RSV	other_antigens	-0.000499446315152727	-0.00128078052150823	0.000281887891202775	0.209369457400328	-1008.47155921679	-997.431041389737	0.00199184144173015	0.000396989245390001	ns	ns	0.329610572442131	ns	ns
IgG3	weight_g	log10_cb_mot_ratio	Pneumo	other_antigens	1.12593485108343e-05	-6.36855225220844e-06	2.88872492738771e-05	0.209724471374989	-704.924746616138	-693.884228789087	0.00198341173164007	8.9565860099386e-06	ns	ns	0.477750550439216	ns	ns
IgG	cd4_cells_cat<350	log10_cb_mot_ratio	MSP1_42_3D7	exposure_antigen	-0.00941870872857854	-0.0242307029835732	0.00539328552641608	0.210010046468948	-385.507670069592	-377.662308519068	0.00588483059729816	0.00746490661878086	ns	ns	0.943876827099797	ns	ns
IgG3	seasonrainy	log10_cb	Cp17	other_antigens	-0.0173143458439376	-0.0444430042768826	0.0098143125890074	0.210081112755198	-487.150363636641	-476.089437567622	0.00196139000238282	0.0137842328553812	ns	ns	0.709857882863936	ns	ns
IgG1	haartno	log10_cb	Shiga_toxin	other_antigens	-0.0157960331692704	-0.0406276022368831	0.00903553589834229	0.210261721234297	-397.45906695538	-389.096591727034	0.00490736306693362	0.0125394723259539	ns	ns	0.490610682880025	ns	ns
IgG	treatmentmq	log10_cb	Measles	vaccine_antigens	0.0214125014330057	-0.0122614689021016	0.0550864717681131	0.210476799188522	-227.206762971758	-218.794699837558	0.00481194896122383	0.0170076535259357	ns	ns	0.708612061196668	ns	ns
IgG	haart_2no	log10_cb_mot_ratio	OSP	other_antigens	0.00639832642026939	-0.00369236956791167	0.0164890224084505	0.210580632315841	-423.538300730378	-416.392220826356	0.00745729213550028	0.00506854401137103	ns	ns	0.43346387901613	ns	ns
IgG1	malaria_placentariaYes	log10_cb	Tetanus_toxin	vaccine_antigens	-0.025301421840164	-0.0650095830662939	0.0144067393859659	0.210851211254083	-628.897794616412	-617.756596199884	0.00189133625917348	0.0201781771340029	ns	ns	0.696621081364725	ns	ns
IgG1	age_cat>30	log10_cb_mot_ratio	MSP1_42_3D7	exposure_antigen	-0.00902574465914031	-0.0231936942239656	0.005142204905685	0.21091177513504	-1006.82846497009	-992.107774534023	0.00710409805327428	0.00719851065837291	ns	ns	0.328084983543395	ns	ns
IgG1	hivload_cat1000/9999	log10_cb_mot_ratio	HepB	vaccine_antigens	-0.0269460535328942	-0.0694379688884639	0.0155458618226756	0.211275758003964	-249.878463443426	-236.656508947719	-0.0133470384220553	0.0214176035083365	ns	ns	0.492976768675916	ns	ns
IgG2	treatmentmq_full	log10_cb	Diphteria_toxin	vaccine_antigens	0.0375653003800908	-0.0216615872805428	0.0967921880407244	0.212227718105977	-144.249927482249	-131.754071564636	-0.00169335848313601	0.0299967174370167	ns	ns	0.697776092460923	ns	ns
IgG3	weight_g_catlow	log10_cb_mot_ratio	Pertussis_toxin	vaccine_antigens	-0.0366695017716325	-0.0944008232147501	0.021061819671485	0.212260191282887	-315.532485564758	-304.491967737707	0.00192368723207736	0.0293327919712796	ns	ns	0.545269335862328	ns	ns
IgG2	treatmentmq	log10_cb	Shiga_toxin	other_antigens	0.0271631525944535	-0.0157597677069775	0.0700860728958844	0.212634027921734	-167.513517552916	-159.126145916126	0.00472922624250449	0.0216771491235254	ns	ns	0.878657064157584	ns	ns
IgG4	hivload_cat>9999	log10_cb_mot_ratio	Rotavirus	other_antigens	0.10032489593665	-0.0584622734295516	0.259112065302853	0.212993794424667	-2.09369494114944	11.2235005294109	0.0500812163191331	0.080054221798972	ns	ns	0.581270651046693	ns	ns
IgG3	log10_pf_exposure	log10_cb	Pneumo	other_antigens	-0.099329805143006	-0.256045903416798	0.0573862931307861	0.213237631154782	-394.544910737714	-383.494171435698	0.0018943350544266	0.0796272515077757	ns	ns	0.699240664223115	ns	ns
IgG3	hivload	log10_cb_mot_ratio	Tetanus_toxin	vaccine_antigens	1.83017519799994e-07	-1.07006242260042e-07	4.7304128186003e-07	0.213626818462711	-87.4921851757531	-79.4736986723674	0.00530759168761286	1.46268674592636e-07	ns	ns	0.299077545847796	ns	ns
IgG2	cd4_cells	log10_cb_mot_ratio	HepB	vaccine_antigens	2.41178472257896e-05	-1.41521432525334e-05	6.23878377041127e-05	0.213843593440182	-287.395604451633	-279.797805972174	0.00612586632279588	1.92662256476284e-05	ns	ns	0.84748213255106	ns	ns
IgG4	hemoglobin	log10_cb	VSP5	other_antigens	-0.0124323924218588	-0.0320847070123808	0.00721992216866318	0.214126383975039	89.9435941944061	101.064924988653	0.00182961630772138	0.0099862890932746	ns	ns	0.772752124719545	ns	ns
IgG	log10_pf_exposure	log10_cb_mot_ratio	Rotavirus	other_antigens	-0.0216785002301155	-0.0559582345469536	0.0126012340867227	0.214249661053695	-1282.34111082503	-1271.33146805608	0.00189711121123337	0.0174164829367831	ns	ns	0.380099863831065	ns	ns
IgG1	malaria_placentariaYes	log10_cb_mot_ratio	Cp17	other_antigens	-0.0134819794007495	-0.0348070357702532	0.0078430769687542	0.214394167296703	-987.836864436605	-976.796346609554	0.00187407472820988	0.0108350792364729	ns	ns	0.50025305702564	ns	ns
IgG1	graviditymultigravidae	log10_cb	HepB	vaccine_antigens	-0.0323652292909105	-0.0835722319523625	0.0188417733705416	0.214529668688813	-133.033033686273	-121.941753226756	0.00183912118137686	0.0260196765925121	ns	ns	0.540162883937524	ns	ns
IgG4	seasonrainy	log10_cb	Rotavirus	other_antigens	0.0558739399929812	-0.0325471450523379	0.1442950250383	0.214621455037575	209.946308890753	221.007234959772	0.00185597900861045	0.0449272797105962	ns	ns	0.545991943733662	ns	ns
IgG1	mat_anemia_recatabnormal	log10_cb	HepB	vaccine_antigens	0.0324820586948897	-0.0189363916871897	0.0839005090769692	0.214760246942062	-130.328330981766	-119.257252618794	0.0018464522013435	0.026126389307933	ns	ns	0.50110724286481	ns	ns
IgG1	log10_mother	log10_cb_mot_ratio	HepB	vaccine_antigens	0.0310932532452529	-0.0181920878811447	0.0803785943716505	0.215335397915386	-677.568676136711	-666.600700704252	0.00189836825921486	0.0250388838791848	ns	ns	0.274063233710492	ns	ns
IgG2	weight_g_catlow	log10_cb_mot_ratio	Shiga_toxin	other_antigens	0.0114539978745395	-0.00670189859600404	0.0296098943450831	0.215357859383094	-983.512776484832	-972.50313371589	0.00187129038352596	0.00922445483849328	ns	ns	0.380081410484651	ns	ns
IgG	hivload_cat400/999	log10_cb	Shiga_toxin	other_antigens	-0.0205716951385875	-0.0533090141745723	0.0121656238973974	0.215617283988711	-320.434048884743	-306.841554528267	-0.000923687686632757	0.0165158697317224	ns	ns	0.804069954276978	ns	ns
IgG2	prematurityYes	log10_cb_mot_ratio	Rotavirus	other_antigens	0.0233027216610205	-0.0136621938195143	0.0602676371415553	0.215684722484479	-681.568933044925	-670.600957612466	0.00189014649232389	0.0187796250399747	ns	ns	0.449004185862147	ns	ns
IgG	hivload_cat1000/9999	log10_cb_mot_ratio	OSP	other_antigens	-0.00604521975195876	-0.0156744438085954	0.00358400430467792	0.215818314739851	-549.214692540864	-536.041047599716	0.0122963985705231	0.00485290887618813	ns	ns	0.436983125372463	ns	ns
IgG4	hivload_cat>9999	log10_cb_mot_ratio	HepB	vaccine_antigens	0.0439952259498009	-0.0260741434246204	0.114064595324222	0.215838500679398	-175.5264441499	-162.209248679339	-0.0119729748049786	0.0353262096654516	ns	ns	0.581270651046693	ns	ns
IgG1	hivload_cat400/999	log10_cb	Cp17	other_antigens	-0.0363677160041845	-0.0942678606946935	0.0215324286863244	0.215862328043568	-195.01751466031	-181.336522418337	0.0978425600400855	0.0292164491993767	ns	ns	0.503678765434991	ns	ns
IgG	hivload	log10_cb_mot_ratio	VSP5	other_antigens	6.20120389943616e-08	-3.687079498125e-08	1.60894872969973e-07	0.216360578731537	-306.552657613048	-298.648470648359	0.00534054866112232	4.98468964936697e-08	ns	ns	0.501190742808722	ns	ns
IgG1	mat_anemia_recatabnormal	log10_cb_mot_ratio	HepB	vaccine_antigens	-0.0124852572973396	-0.0323345323582701	0.00736401776359097	0.216694891479616	-672.141457799704	-661.194535085221	0.00187979584367393	0.0100839031992636	ns	ns	0.606745696142924	ns	ns
IgG1	age	log10_cb_mot_ratio	HiB	vaccine_antigens	-0.000712361714873093	-0.00184481007101965	0.000420086641273462	0.216696363159083	-792.277735521038	-781.226996219022	0.00181492061993482	0.000575395578805887	ns	ns	0.329610572442131	ns	ns
IgG1	hemoglobin	log10_cb	Diphteria_toxin	vaccine_antigens	0.0049815405060204	-0.00294178665767331	0.0129048676697141	0.216944315485434	-457.500200827807	-446.419004411399	0.00179075369552262	0.00402600290296445	ns	ns	0.506203402799345	ns	ns
IgG2	weight_g_catlow	log10_cb_mot_ratio	OSP	other_antigens	-0.0247872314054859	-0.0642355014773108	0.0146610386663389	0.217189377419801	-531.685459552486	-520.686179488149	0.00183537943546963	0.0200421629469582	ns	ns	0.380081410484651	ns	ns
IgG	log10_pf_exposure	log10_cb_mot_ratio	HiB	vaccine_antigens	-0.0172161525152962	-0.0446156731510733	0.0101833681204809	0.21719992218918	-1411.04335172146	-1400.03370895252	0.00182871711075183	0.0139208571227066	ns	ns	0.380099863831065	ns	ns
IgG	graviditymultigravidae	log10_cb_mot_ratio	RSV	other_antigens	-0.00307496483418285	-0.00796995734631552	0.00182002767794983	0.217301044330836	-1484.5787191363	-1473.60027248902	0.0018457610541287	0.00248688528221973	ns	ns	0.437596187980104	ns	ns
IgG3	mat_anemiaabnormal	log10_cb_mot_ratio	MSP1_42_3D7	exposure_antigen	-0.00692411413544653	-0.0179479915350572	0.00409976326416419	0.217378783065442	-964.072094069887	-953.041832663082	0.0018119302814239	0.00560105741445533	ns	ns	0.593335414559811	ns	ns
IgG1	age_catbetween_20_30	log10_cb_mot_ratio	Cp17	other_antigens	-0.0076018486004445	-0.0197058000294857	0.00450210282859667	0.217418708944454	-986.665112661796	-971.944422225728	0.00125948075141147	0.00614982591317936	ns	ns	0.304386192522235	ns	ns
IgG2	age_cat>30	log10_cb_mot_ratio	MSP1_42_3D7	exposure_antigen	-0.014983904968739	-0.03884543487277	0.00887762493529196	0.217474793723153	-698.470018536181	-683.804311783731	-0.00152595696772173	0.0121229546666691	ns	ns	0.693564027730252	ns	ns
IgG2	mat_anemia_recatabnormal	log10_cb	HepB	vaccine_antigens	0.0266582156045569	-0.0158560519558175	0.0691724831649314	0.218124182728124	-247.237528882442	-236.301188189512	0.00185288839043696	0.0215979264702484	ns	ns	0.983731998679191	ns	ns
IgG2	prematurityYes	log10_cb_mot_ratio	OSP	other_antigens	-0.0302934736095957	-0.078647310309948	0.0180603630907565	0.218530845913166	-526.151259851904	-515.193792311098	0.00183023610175836	0.0245652716704678	ns	ns	0.449004185862147	ns	ns
IgG4	weight_g	log10_cb	Measles	vaccine_antigens	3.87917689843667e-05	-2.32160634182327e-05	0.000100799601386966	0.219233994051106	39.5467031237174	50.6379835832337	0.00173367877548736	3.15078731708875e-05	ns	ns	0.585136030903845	ns	ns
IgG3	haartno	log10_cb_mot_ratio	Pneumo	other_antigens	-0.0211857907430879	-0.0551733031040454	0.0128017216178697	0.219367614627808	-310.907488324852	-302.725324868715	0.00467178649613154	0.0171518381803742	ns	ns	0.383893325598664	ns	ns
IgG4	log10_pf_exposure	log10_cb	RSV	other_antigens	0.192804632555906	-0.115608947102898	0.50121821221471	0.219529310152402	-3.94591814764691	7.04296329276093	0.00178800141932978	0.156690868516239	ns	ns	0.614682068426727	ns	ns
IgG2	gest_age	log10_cb_mot_ratio	Pneumo	other_antigens	-0.00506115481959528	-0.0131601230683432	0.00303781342915259	0.219654401486749	-666.324526920348	-655.485142601184	0.0018777648188314	0.00411381629759062	ns	ns	0.991645029243957	ns	ns
IgG2	hivload_cat>9999	log10_cb	Cp17	other_antigens	-0.0436370242238438	-0.113724486363727	0.0264504379160394	0.219883673882697	-182.046128532464	-168.365136290492	0.0332359271776016	0.0353661772016055	ns	ns	0.719251964778656	ns	ns
IgG4	weight_g	log10_cb_mot_ratio	Cp17	other_antigens	2.91308213786981e-05	-1.7540338140937e-05	7.58019808983332e-05	0.220246049569399	-132.307533814383	-121.329087167104	0.00177790966560942	2.37111332501185e-05	ns	ns	0.859798736153152	ns	ns
IgG3	weight_g	log10_cb_mot_ratio	Shiga_toxin	other_antigens	1.56364654881217e-05	-9.4500091254851e-06	4.07229401017285e-05	0.220907146588043	-498.157035487103	-487.116517660052	0.00172620135637447	1.27462237610264e-05	ns	ns	0.477750550439216	ns	ns
IgG2	age_catbetween_20_30	log10_cb	MSP1_42_3D7	exposure_antigen	-0.0481571597673681	-0.125422492898604	0.0291081733638684	0.220943940132544	106.668473930603	121.456847876625	0.000658581382971812	0.03926007964309	ns	ns	0.617661911815008	ns	ns
IgG	seasonrainy	log10_cb_mot_ratio	Tetanus_toxin	vaccine_antigens	0.00508601261552756	-0.0030793966984024	0.0132514219294575	0.221184619081024	-1150.57879188151	-1139.66372787351	0.00179458899576701	0.00414802963927578	ns	ns	0.983074625956454	ns	ns
IgG2	mat_anemiaabnormal	log10_cb_mot_ratio	Rotavirus	other_antigens	-0.011013243176156	-0.0287171039504444	0.0066906175981324	0.221797709571322	-684.376798482538	-673.3775184182	0.0017303539266541	0.00899465709858785	ns	ns	0.664696216361684	ns	ns
IgG	age_cat>30	log10_cb_mot_ratio	Pneumo	other_antigens	-0.00544439658116638	-0.0141999186127298	0.00331112545039702	0.221981623965908	-1270.03246439044	-1255.3806224699	0.00747275280987825	0.00444821495119286	ns	ns	0.37733901650542	ns	ns
IgG4	log10_pf_exposure	log10_cb_mot_ratio	HiB	vaccine_antigens	-0.27835616944929	-0.725997819265626	0.169285480367046	0.221988763564982	219.141455019349	230.15109778829	0.0017200156487478	0.227433009945765	ns	ns	0.41606650871673	ns	ns
IgG	hivload_cat1000/9999	log10_cb_mot_ratio	Rotavirus	other_antigens	-0.0100523996824235	-0.0262822406275605	0.0061774412627135	0.222020406652736	-445.991657167711	-432.769702672004	-0.0119950238226936	0.00818048081517574	ns	ns	0.436983125372463	ns	ns
IgG	haart_2no	log10_cb_mot_ratio	Measles	vaccine_antigens	0.0209278596814064	-0.0129415964525547	0.0547973158153675	0.222296135237064	-227.099140831371	-219.99079727397	0.00654487424776895	0.0170091055228305	ns	ns	0.43346387901613	ns	ns
IgG4	weight_g	log10_cb	Shiga_toxin	other_antigens	3.9162337786721e-05	-2.39148358098598e-05	0.000102239511383302	0.222742496997745	50.8454374949711	61.9767185470957	0.00163451640973333	3.20529890119733e-05	ns	ns	0.585136030903845	ns	ns
IgG2	hivload_cat1000/9999	log10_cb_mot_ratio	Cp17	other_antigens	-0.0178464313415192	-0.0467600916979538	0.0110672290149154	0.223668186300283	-330.692805638595	-317.375610168035	-0.00509844745163801	0.0145771260261966	ns	ns	0.597235384362054	ns	ns
IgG1	gest_age	log10_cb	Rotavirus	other_antigens	0.00494927081126836	-0.00304364487779891	0.0129421865003356	0.223954461428613	-701.17048333257	-690.10955726355	0.00164737133164072	0.00406124804600493	ns	ns	0.522560410000097	ns	ns
IgG4	malaria_placentariaYes	log10_cb_mot_ratio	RSV	other_antigens	0.0312017499159862	-0.0192047464183621	0.0816082462503344	0.224070623063272	-484.589245684826	-473.642322970342	0.00170952924003376	0.0256076974141027	ns	ns	0.863571561822308	ns	ns
IgG4	hivload	log10_cb_mot_ratio	HiB	vaccine_antigens	4.76009000319508e-07	-2.95834476307638e-07	1.24785247694665e-06	0.224129255438859	121.975063966037	129.993550469422	0.00465116791134235	3.89266457056214e-07	ns	ns	0.325865626264556	ns	ns
IgG3	hemoglobin	log10_cb_mot_ratio	OSP	other_antigens	-0.0126633500336153	-0.0331278748395387	0.00780117477230819	0.224252310388676	98.8219150806063	109.852176487411	0.00165799608152906	0.0103977007583167	ns	ns	0.618689381824232	ns	ns
IgG2	prematurityYes	log10_cb_mot_ratio	HepB	vaccine_antigens	0.0181654283524037	-0.0112122501665968	0.0475431068714041	0.224502092931074	-832.584969331595	-821.823223356395	0.00180977883506916	0.0149204321079006	ns	ns	0.449004185862147	ns	ns
IgG2	mat_anemiaabnormal	log10_cb	Rotavirus	other_antigens	-0.0176176491885781	-0.0461457682418315	0.0109104698646752	0.22520013500679	-409.140290349312	-398.049009889795	0.0016037600222274	0.0144959164367791	ns	ns	0.525466981682509	ns	ns
IgG4	age	log10_cb	Diphteria_toxin	vaccine_antigens	-0.00192779727688367	-0.00505608924903314	0.0012004946952658	0.226181469506805	-188.220110600129	-177.128830140613	0.00158278395162548	0.00158957058940604	ns	ns	0.920263800068556	ns	ns
IgG2	haartno	log10_cb_mot_ratio	Rotavirus	other_antigens	0.0241030622334549	-0.0151838942190878	0.0633900186859976	0.226671941330237	-278.160225449543	-269.978061993406	0.00424943839946401	0.0198262088886353	ns	ns	0.684267253819175	ns	ns
IgG2	age	log10_cb_mot_ratio	OSP	other_antigens	0.00109825802005391	-0.000686872731254064	0.00288338877136188	0.226923201462113	-523.972604017533	-512.962961248591	0.00161089385389734	0.000906970251948841	ns	ns	0.571647546223914	ns	ns
IgG3	age_cat>30	log10_cb	Tetanus_toxin	vaccine_antigens	-0.0557343300536905	-0.146741219197636	0.0352725590902551	0.229083295948811	98.4694815505156	113.324412772553	0.000679746372081458	0.0462456170975753	ns	ns	0.733015097800292	ns	ns
IgG2	hivload_cat1000/9999	log10_cb	HiB	vaccine_antigens	-0.038892762527213	-0.102652300017784	0.0248667749633576	0.229285383637013	-162.233348662284	-148.596409568722	-0.0117324438066642	0.0321698200504025	ns	ns	0.458066068101567	ns	ns
IgG2	mat_anemia_recatabnormal	log10_cb_mot_ratio	MSP1_42_3D7	exposure_antigen	0.0117997534000905	-0.00750494588602437	0.0311044526862054	0.229931330281384	-694.22741352907	-683.248966881791	0.00156216849468516	0.00980769069887714	ns	ns	0.667499276831766	ns	ns
IgG1	hivload_cat>9999	log10_cb	HepB	vaccine_antigens	-0.0883130393188921	-0.233311001212954	0.0566849225751694	0.229965391966644	-19.1998162867274	-5.60732193025192	9.64067810522717e-05	0.0731509946607186	ns	ns	0.459930783933288	ns	ns
IgG1	age	log10_cb_mot_ratio	Rotavirus	other_antigens	0.000478268237599353	-0.000304316163039454	0.00126085263823816	0.23002935679804	-1009.56459649196	-998.513857189948	0.0015223205414292	0.000397630145097539	ns	ns	0.329610572442131	ns	ns
IgG1	age	log10_cb_mot_ratio	Diphteria_toxin	vaccine_antigens	-0.000486935792783868	-0.00128440018137127	0.000310528595803538	0.230412479508197	-984.28075308194	-973.302306434661	0.0015517355029564	0.000405149230802056	ns	ns	0.329610572442131	ns	ns
IgG1	weight_g_catlow	log10_cb_mot_ratio	HepB	vaccine_antigens	-0.0183909152539782	-0.0485192569113558	0.0117374264033995	0.230547151628575	-678.31309177965	-667.355624238844	0.00155986368245109	0.015306146281227	ns	ns	0.929058422319716	ns	ns
IgG3	weight_g_catlow	log10_cb_mot_ratio	HiB	vaccine_antigens	-0.0771118090543574	-0.203563526472984	0.0493399083642695	0.231037149442551	143.927082264174	154.967600091225	0.00150623551108686	0.0642490389745585	ns	ns	0.545269335862328	ns	ns
IgG1	haartno	log10_cb_mot_ratio	RSV	other_antigens	-0.00675187511767906	-0.0178694000304701	0.00436564979511195	0.231342627238089	-558.598350379604	-550.442853765718	0.00402483204786164	0.00560991001963088	ns	ns	0.647759356266649	ns	ns
IgG1	cd4_cells	log10_cb	Pneumo	other_antigens	3.46383723827147e-05	-2.24282782811807e-05	9.17050230466101e-05	0.231527767048344	-233.663724540874	-225.589680894186	0.00412969304556843	2.87868893184055e-05	ns	ns	0.96362650283145	ns	ns
IgG4	age_cat>30	log10_cb_mot_ratio	Rotavirus	other_antigens	0.0451858140773652	-0.0291032188124484	0.119474846967179	0.232233069062014	-35.8376022752539	-21.1169118391856	-0.00113920612695861	0.0377450803738891	ns	ns	0.262811145770134	ns	ns
IgG3	treatmentmq_split	log10_cb_mot_ratio	Rotavirus	other_antigens	0.00969061640703732	-0.00626828142861212	0.0256495142426868	0.232353804237355	-607.381282609392	-594.69934662924	-0.00173247649105557	0.0080854846442422	ns	ns	0.583051034366799	ns	ns
IgG2	motHIV+	log10_cb_mot_ratio	Tetanus_toxin	vaccine_antigens	0.011909719676251	-0.00768809925496507	0.0315075386074671	0.232613309223969	-605.913036773521	-594.976696080591	0.00152595781654141	0.00995600480832837	ns	ns	0.361842925459507	ns	ns
IgG4	hivload	log10_cb_mot_ratio	VSP5	other_antigens	3.01455875423661e-07	-1.96569034851106e-07	7.99480785698429e-07	0.23276116161754	28.2148838940408	36.2333703974266	0.00413835751727376	2.51170604169073e-07	ns	ns	0.325865626264556	ns	ns
IgG	hivload_cat400/999	log10_cb	Measles	vaccine_antigens	0.0335125752715276	-0.0218846270914482	0.0889097776345035	0.233106681959735	-202.607044703159	-189.014550346684	-0.00119535075010879	0.027947706307993	ns	ns	0.804069954276978	ns	ns
IgG3	log10_pf_exposure	log10_cb_mot_ratio	HiB	vaccine_antigens	-0.237408091191135	-0.628665348151467	0.153849165769198	0.233360418796207	143.433583904886	154.484323206902	0.00145237801627596	0.19879731787218	ns	ns	0.544507643857816	ns	ns
IgG3	age	log10_cb_mot_ratio	VSP5	other_antigens	0.00153369231212123	-0.000997964999804155	0.00406534962404661	0.234112026911224	-319.236335690754	-308.185596388738	0.00143676238284796	0.00128633188120849	ns	ns	0.450435546295748	ns	ns
IgG	prematurityYes	log10_cb_mot_ratio	Pneumo	other_antigens	0.00816882302409655	-0.00532799764315371	0.0216656436913468	0.234505747935287	-1240.49087797972	-1229.5651567669	0.0014904174407826	0.00685649439809466	ns	ns	0.547180078515669	ns	ns
IgG4	treatmentmq	log10_cb	HepB	vaccine_antigens	0.0248845835792409	-0.0163559545220695	0.0661251216805513	0.234563328455761	-177.748801888809	-169.336738754609	0.00351888882978346	0.020829286724143	ns	ns	0.964166868313074	ns	ns
IgG4	graviditymultigravidae	log10_cb_mot_ratio	RSV	other_antigens	0.0169469556320638	-0.0110774976933254	0.0449714089574529	0.234914408070964	-484.521395245105	-473.574472530622	0.00147099917217197	0.0142370879378734	ns	ns	0.274066809416125	ns	ns
IgG	haartno	log10_cb_mot_ratio	Measles	vaccine_antigens	0.0176005328281306	-0.0116150655876846	0.0468161312439457	0.235017270954197	-340.336277462192	-332.262233815505	0.00393129465971698	0.0147376127419924	ns	ns	0.411280224169845	ns	ns
IgG	weight_g_catlow	log10_cb_mot_ratio	Rotavirus	other_antigens	-0.00656514699988809	-0.0174309230840733	0.00430062908429713	0.235330822859801	-1276.94256472034	-1265.94328465601	0.0014363919634961	0.00552048681546475	ns	ns	0.95294454184857	ns	ns
IgG1	age	log10_cb_mot_ratio	Measles	vaccine_antigens	-0.00044944579264183	-0.00119345045545896	0.000294558870175298	0.235436123172951	-1039.29062767338	-1028.23988837136	0.00140939890578395	0.000378027829059375	ns	ns	0.329610572442131	ns	ns
IgG1	prematurityYes	log10_cb	OSP	other_antigens	-0.0331569607812143	-0.0880433384974199	0.0217294169349913	0.235436954339558	-455.438035660946	-444.356839244537	0.00139491735989894	0.0278888794383234	ns	ns	0.412014670094227	ns	ns
IgG1	haart_2no	log10_cb	MSP1_42_3D7	exposure_antigen	-0.0423790710482041	-0.112899313095929	0.0281411709995205	0.235469859814911	-110.998495707434	-103.60077135147	0.00494819540754243	0.0354681790026994	ns	ns	0.542937966475083	ns	ns
IgG4	mat_anemiaabnormal	log10_cb_mot_ratio	Cp17	other_antigens	0.0277936170238633	-0.0182631949362536	0.0738504289839803	0.235893158580517	-130.962261337869	-119.994285905409	0.0014398123929461	0.0233986645959756	ns	ns	0.471786317161035	ns	ns
IgG4	haart_2no	log10_cb_mot_ratio	Measles	vaccine_antigens	-0.0886309448601799	-0.236444741840768	0.0591828521204083	0.236199233110553	10.6816337557718	17.8277136597935	0.00535103184612928	0.0742466858937669	ns	ns	0.472398466221106	ns	ns
IgG3	seasonrainy	log10_cb	OSP	other_antigens	0.047765711644013	-0.0314418152980995	0.126973238586125	0.236248526351688	145.02322315703	156.08414922605	0.00138790388453147	0.0402458159870914	ns	ns	0.709857882863936	ns	ns
IgG4	prematurityYes	log10_cb	Pertussis_toxin	vaccine_antigens	-0.0682112804361166	-0.181333041139084	0.0449104802668513	0.236294647838799	-25.8260166928187	-14.7549383298465	0.00138219966285036	0.0574786508998845	ns	ns	0.254471159211015	ns	ns
IgG1	treatmentmq_full	log10_cb	RSV	other_antigens	-0.0148140089289541	-0.0394468689915563	0.00981885113364814	0.236869837196945	-458.87336148203	-446.146227280861	0.00910910781268504	0.0124811028190455	ns	ns	0.663235544151445	ns	ns
IgG3	mat_anemia_recatabnormal	log10_cb	Pertussis_toxin	vaccine_antigens	0.023083658542119	-0.0152494951676529	0.0614168122518909	0.236935484621577	-302.142474369234	-291.021143574988	0.00134606179951569	0.019478924634523	ns	ns	0.892138663168501	ns	ns
IgG2	prematurityYes	log10_cb	Pneumo	other_antigens	-0.0244951520878096	-0.0651817190034721	0.0161914148278529	0.237004086549195	-633.109670676891	-622.110390612553	0.00140146010707365	0.0206712943911435	ns	ns	0.829514302922181	ns	ns
IgG2	hivload	log10_cb_mot_ratio	Pneumo	other_antigens	8.51571938998783e-08	-5.69392421790716e-08	2.27253629978828e-07	0.237292936482499	-232.616896081613	-224.712709116924	0.0040358465149648	7.16308994854833e-08	ns	ns	0.553683518459165	ns	ns
IgG4	log10_pf_exposure	log10_cb_mot_ratio	Pertussis_toxin	vaccine_antigens	-0.13268015853379	-0.353410315965525	0.0880499988979452	0.237752290695274	-192.03032469496	-181.000063288155	0.00137146061275484	0.112149495142296	ns	ns	0.41606650871673	ns	ns
IgG4	graviditymultigravidae	log10_cb	HiB	vaccine_antigens	0.062800157929703	-0.0417064712690857	0.167306787128492	0.237922758093704	302.947435771968	314.078716824092	0.0013219425705292	0.0531055791879794	ns	ns	0.337638686750813	ns	ns
IgG2	weight_g	log10_cb_mot_ratio	Rotavirus	other_antigens	-1.08635883889691e-05	-2.89436789391684e-05	7.21650216123023e-06	0.237930364325341	-687.103754637158	-676.094111868216	0.00137740414462517	9.18594017248158e-06	ns	ns	0.858379611398986	ns	ns
IgG	malaria_placentariaYes	log10_cb_mot_ratio	RSV	other_antigens	-0.00534304239907759	-0.014249944453156	0.00356385965500084	0.238686221443055	-1484.4437744188	-1473.46532777152	0.00137632790750297	0.00452512308722812	ns	ns	0.915556904414825	ns	ns
IgG1	haart_2no	log10_cb	Shiga_toxin	other_antigens	-0.0150918664290104	-0.0403853202315205	0.0102015873734997	0.238792897934807	-289.41012138856	-282.012397032596	0.00471494459087229	0.0127213509343433	ns	ns	0.542937966475083	ns	ns
IgG4	seasonrainy	log10_cb_mot_ratio	Pertussis_toxin	vaccine_antigens	0.0273668585602466	-0.0182696794390502	0.0730033965595434	0.238840518953039	-184.615926103908	-173.658458563102	0.00138292833262876	0.0231847983645977	ns	ns	0.341292770840117	ns	ns
IgG	age_cat>30	log10_cb_mot_ratio	Pertussis_toxin	vaccine_antigens	-0.00432003920104169	-0.0115304680092427	0.00289038960715934	0.239260224991702	-1375.4495344703	-1360.81160560726	-9.4017093035248e-06	0.00366318027879035	ns	ns	0.37733901650542	ns	ns
IgG	weight_g	log10_cb_mot_ratio	Shiga_toxin	other_antigens	2.88576309841326e-06	-1.93107257702855e-06	7.70259877385508e-06	0.23930781164185	-1455.6194118488	-1444.59944204729	0.00134438853296481	2.44732238882607e-06	ns	ns	0.998199734804688	ns	ns
IgG4	hivload_cat1000/9999	log10_cb_mot_ratio	RSV	other_antigens	-0.0393721354494387	-0.105378934124747	0.02663466322587	0.239451808787493	-153.428047279825	-140.206092784118	0.0411608805896594	0.0332700333946478	ns	ns	0.805235149417467	ns	ns
IgG	treatmentmq_full	log10_cb_mot_ratio	Diphteria_toxin	vaccine_antigens	-0.00450731184083494	-0.0120451347507266	0.0030305110690567	0.239477028422518	-855.394619625997	-842.827965399987	0.0214394891392705	0.00381819443470053	ns	ns	0.739791850848392	ns	ns
IgG	haart_2no	log10_cb	VSP5	other_antigens	-0.0371939317239589	-0.0996345061571187	0.0252466427092009	0.239492851758356	-134.177848296161	-126.84989452669	0.0047825122327404	0.031393583246646	ns	ns	0.53888303245398	ns	ns
IgG3	cd4_cells	log10_cb_mot_ratio	Cp17	other_antigens	7.78943982173367e-06	-5.2812444855314e-06	2.08601241289987e-05	0.239902411705599	-527.09226226848	-519.188075303791	0.00388285566430357	6.5889398753111e-06	ns	ns	0.956272476551221	ns	ns
IgG1	hemoglobin	log10_cb_mot_ratio	HepB	vaccine_antigens	0.0032016304494214	-0.00216095232977565	0.00856421322861846	0.240904504714242	-671.989286639218	-661.042363924734	0.0013448458150811	0.00272431942614866	ns	ns	0.56827013605364	ns	ns
IgG4	graviditymultigravidae	log10_cb	Rotavirus	other_antigens	0.0533989623242657	-0.0360801007356539	0.142878025384185	0.241170490536295	210.190934376988	221.332132793516	0.0012539624567699	0.0454698562828326	ns	ns	0.337638686750813	ns	ns
IgG3	treatmentmq	log10_cb	Shiga_toxin	other_antigens	0.033565667554352	-0.0229016876470304	0.0900330227557344	0.241595785403089	-100.728656950456	-92.2678122536408	0.0031177574161132	0.0285246305655216	ns	ns	0.683161360973628	ns	ns
IgG1	age	log10_cb	Shiga_toxin	other_antigens	0.000514025208259577	-0.000348181117806339	0.00137623153432549	0.241644235143435	-967.042182207782	-955.900983791254	0.00124477949367863	0.000438140458691583	ns	ns	0.483288470286869	ns	ns
IgG3	graviditymultigravidae	log10_cb_mot_ratio	MSP1_42_3D7	exposure_antigen	-0.00734814068600847	-0.0196783524264522	0.00498207105443524	0.241794177770527	-972.503021696456	-961.45228239444	0.00128054459727567	0.00626496500496804	ns	ns	0.430884220866543	ns	ns
IgG3	age_catbetween_20_30	log10_cb_mot_ratio	RSV	other_antigens	-0.0132316229453344	-0.0354369299701876	0.00897368407951873	0.241845457267947	-633.243043252096	-618.508724182742	-0.00134543131345932	0.0112823270858295	ns	ns	0.578264601131178	ns	ns
IgG2	hemoglobin	log10_cb	VSP5	other_antigens	-0.00956871218425771	-0.025629005815961	0.00649158144744561	0.241913219630557	-37.9604569830556	-26.8995309140361	0.00127376457322681	0.00816033080634583	ns	ns	0.50214154495553	ns	ns
IgG	age_catbetween_20_30	log10_cb	OSP	other_antigens	0.00918903832502906	-0.00624018577615216	0.0246182624262103	0.242114887929113	-857.635381244367	-842.820251345742	0.00703845097958611	0.00784011852854899	ns	ns	0.423701053875948	ns	ns
IgG3	age_cat>30	log10_cb	Measles	vaccine_antigens	0.0255018112205234	-0.0173429566018956	0.0683465790429424	0.242398166735722	-358.061633763568	-343.20670254153	-0.00161489828461892	0.0217717883336958	ns	ns	0.733015097800292	ns	ns
IgG	age_cat>30	log10_cb_mot_ratio	OSP	other_antigens	0.00269447402671691	-0.00183455481542851	0.00722350286886234	0.242575082039199	-1657.96956095895	-1643.29003726703	-0.00214268092058001	0.00230102698750747	ns	ns	0.37733901650542	ns	ns
IgG4	treatmentmq_split	log10_cb	Rotavirus	other_antigens	0.0797637631038465	-0.0545718557221054	0.214099381929798	0.24284554521987	146.186637483143	158.913771684311	-0.00322579013109681	0.0680658545765997	ns	ns	0.844116402752707	ns	ns
IgG1	treatmentmq_split	log10_cb	Rotavirus	other_antigens	0.0158676171154912	-0.0108566289347002	0.0425918631656826	0.242854410699017	-428.671497333132	-415.944363131964	0.00826792127081633	0.0135407769080094	ns	ns	0.894442691115742	ns	ns
IgG	mat_anemia_recatabnormal	log10_cb	HepB	vaccine_antigens	0.0140509410823606	-0.00959331620104675	0.0376951983657679	0.243115073928837	-586.290885577583	-575.260624170778	0.0012630300149824	0.0120132724417993	ns	ns	0.567268505833952	ns	ns
IgG1	mat_anemiaabnormal	log10_cb	Pertussis_toxin	vaccine_antigens	-0.0132258464679853	-0.035482138728044	0.00903044579207349	0.243155319132976	-558.764871424311	-547.643540630064	0.00122384814777354	0.0113094957659872	ns	ns	0.652271617357768	ns	ns
IgG	cd4_cells_cat<350	log10_cb	Cp17	other_antigens	-0.0205063261504172	-0.0551657836658305	0.014153131364996	0.243422212790395	-220.362167574688	-212.315773893316	0.00350120696588652	0.0174818447416542	ns	ns	0.661913499446574	ns	ns
IgG1	hemoglobin	log10_cb_mot_ratio	Diphteria_toxin	vaccine_antigens	0.0018723353242038	-0.00128138724219399	0.00502605789060159	0.243544344022988	-978.423596833326	-967.46612929252	0.00128584025146994	0.00160219037212992	ns	ns	0.56827013605364	ns	ns
IgG4	seasonrainy	log10_cb_mot_ratio	OSP	other_antigens	0.0545651924185816	-0.0374107214983014	0.146541106335465	0.243878221107312	209.177963302885	220.103684515699	0.00129288958467233	0.0467245104664509	ns	ns	0.341292770840117	ns	ns
IgG3	treatmentmq	log10_cb	Rotavirus	other_antigens	-0.0323718778320643	-0.0871095049113439	0.0223657492472152	0.243986200347724	-108.444267630417	-99.9834229336018	0.00300416024835781	0.027650853929697	ns	ns	0.683161360973628	ns	ns
IgG3	mat_anemiaabnormal	log10_cb_mot_ratio	HiB	vaccine_antigens	0.0436322832294018	-0.0299272806563926	0.117191847115196	0.243993248625144	144.378522709949	155.408784116754	0.0012455504754304	0.0373744487326373	ns	ns	0.593335414559811	ns	ns
IgG4	age_cat>30	log10_cb_mot_ratio	MSP1_42_3D7	exposure_antigen	-0.00498966601038705	-0.0134029972266911	0.003423665205917	0.244038921072267	-1289.05140022061	-1274.42743297733	0.0192725947956667	0.00427423718748321	ns	ns	0.262811145770134	ns	ns
IgG	seasonrainy	log10_cb	Measles	vaccine_antigens	0.0143384049997376	-0.00984530987805635	0.0385221198775316	0.244196623265635	-551.179345219895	-540.159375418381	0.00124585504875041	0.0122871841294405	ns	ns	0.970697868795343	ns	ns
IgG2	graviditymultigravidae	log10_cb_mot_ratio	OSP	other_antigens	0.0155186465466554	-0.0106592191692835	0.0416965122625944	0.244256171881077	-523.867515465208	-512.857872696267	0.0012490377223755	0.0133001716801258	ns	ns	0.47462123323583	ns	ns
IgG2	haartno	log10_cb_mot_ratio	OSP	other_antigens	-0.0306260967000754	-0.0824819689864924	0.0212297755863417	0.244381162078277	-215.428136088422	-207.245972632285	0.00328945573310735	0.0261691270815243	ns	ns	0.684267253819175	ns	ns
IgG1	mat_anemiaabnormal	log10_cb_mot_ratio	RSV	other_antigens	0.00612786402090502	-0.00421891925419419	0.0164746472960042	0.244710338684609	-999.391161080502	-988.371191278987	0.00123564030427548	0.00525696039218919	ns	ns	0.685188948316905	ns	ns
IgG2	log10_pf_exposure	log10_cb	MSP1_42_3D7	exposure_antigen	0.222342813116937	-0.15313124377795	0.597816870011823	0.244768925343264	109.325876717284	120.325156781621	0.00124317287814069	0.190764061819217	ns	ns	0.422597308113222	ns	ns
IgG	treatmentmq_full	log10_cb	VSP5	other_antigens	-0.0162262989231829	-0.043680282581491	0.0112276847351252	0.245009019266704	-420.272297465344	-407.545163264176	0.00990625078789942	0.0139105240707295	ns	ns	0.507463646983421	ns	ns
IgG2	hivload_cat>9999	log10_cb_mot_ratio	RSV	other_antigens	0.0206690228882502	-0.0144241447717317	0.0557621905482321	0.245408264808097	-321.91809739361	-308.648295642822	0.0254479232251013	0.0176904870709263	ns	ns	0.72703274040227	ns	ns
IgG2	gest_age	log10_cb	Measles	vaccine_antigens	-0.010009407471841	-0.026938729067661	0.00691991412397894	0.24549282431848	-256.434496718697	-245.456050071418	0.00123744494814837	0.00860088766433403	ns	ns	0.580009583472375	ns	ns
IgG3	mat_anemiaabnormal	log10_cb_mot_ratio	RSV	other_antigens	0.011570825369531	-0.00800686142820008	0.031148512167262	0.245690567105952	-628.66518676904	-617.634925362235	0.00121198203972261	0.00994711241982679	ns	ns	0.593335414559811	ns	ns
IgG2	mat_anemia_recatabnormal	log10_cb_mot_ratio	Measles	vaccine_antigens	0.00990916657833964	-0.00686935350699957	0.0266876866636789	0.246000728137514	-757.707057634001	-746.781336421187	0.00124943304826275	0.00852362432677153	ns	ns	0.667499276831766	ns	ns
IgG3	graviditymultigravidae	log10_cb_mot_ratio	HepB	vaccine_antigens	0.00969889657232928	-0.00673019293102668	0.0261279860756852	0.246219554780882	-799.716629225859	-788.706986456918	0.00121001414586608	0.0083471171146601	ns	ns	0.430884220866543	ns	ns
IgG	age	log10_cb_mot_ratio	HiB	vaccine_antigens	0.000226567839503921	-0.000157225685327884	0.000610361364335725	0.246228465903209	-1410.86360365598	-1399.85396088704	0.00120983789511231	0.000194993733460694	ns	ns	0.655035988843007	ns	ns
IgG	weight_g	log10_cb	Pertussis_toxin	vaccine_antigens	-1.07995089051014e-05	-2.90988279884573e-05	7.49981017825455e-06	0.246395598389285	-687.975206338703	-676.894009922295	0.00117759448470356	9.29825441128429e-06	ns	ns	0.954316016513386	ns	ns
IgG3	weight_g	log10_cb_mot_ratio	Tetanus_toxin	vaccine_antigens	2.5361605969775e-05	-1.76491621350701e-05	6.83723740746201e-05	0.246782883689003	-182.231740089212	-171.191222262161	0.00118639149380162	2.18534043879014e-05	ns	ns	0.477750550439216	ns	ns
IgG1	cd4_cells_cat<350	log10_cb_mot_ratio	Diphteria_toxin	vaccine_antigens	-0.0100583067120006	-0.027204973966883	0.00708836054288174	0.247241746241114	-355.941626893543	-348.09626534302	0.00353525276409283	0.00864152845845476	ns	ns	0.608544716357413	ns	ns
IgG	log10_pf_exposure	log10_cb_mot_ratio	VSP5	other_antigens	-0.0299608537229891	-0.0808430754341486	0.0209213679881704	0.247432564101638	-1049.74668538312	-1038.74740531878	0.00119027294536389	0.0258513181131022	ns	ns	0.384895099713659	ns	ns
IgG	haartno	log10_cb	VSP5	other_antigens	-0.0336325218781536	-0.0909532809390974	0.0236882371827902	0.247550860751081	-199.094734108324	-190.808212303931	0.00301471388541885	0.0289380759470447	ns	ns	0.495101721502163	ns	ns
IgG	haart_2no	log10_cb_mot_ratio	Diphteria_toxin	vaccine_antigens	0.0154141307916227	-0.0109394591160053	0.0417677206992507	0.247693645152074	-263.546296753659	-256.476170273591	0.00461555263001767	0.0132318885041702	ns	ns	0.43346387901613	ns	ns
IgG4	age_cat>30	log10_cb	HepB	vaccine_antigens	0.0230593536576768	-0.0161275197287862	0.0622462270441399	0.247773297264426	-410.554833720029	-395.739703821404	-0.00181012809503578	0.0199121958497959	ns	ns	0.979722446570148	ns	ns
IgG1	hivload_cat1000/9999	log10_cb	OSP	other_antigens	0.0362155213447442	-0.0256709014196736	0.098101944109162	0.248675607885644	-170.496079991688	-156.815087749716	-0.00520828573508947	0.0312279276069607	ns	ns	0.348145851039901	ns	ns
IgG1	haart_2no	log10_cb_mot_ratio	RSV	other_antigens	-0.00722433595130527	-0.0196050044696216	0.00515633256701101	0.248998832415783	-395.352345739771	-388.132187997978	0.00428367838736887	0.00622124319561236	ns	ns	0.719258354446297	ns	ns
IgG2	seasonrainy	log10_cb_mot_ratio	VSP5	other_antigens	0.0144826367930857	-0.0102263085183475	0.0391915821045189	0.24956681956814	-531.415479854818	-520.51111104531	0.00118601129884188	0.012551952686487	ns	ns	0.557878970538483	ns	ns
IgG	hivload	log10_cb_mot_ratio	Tetanus_toxin	vaccine_antigens	-3.48153416854502e-08	-9.45759029346581e-08	2.49452195637578e-08	0.250595371404361	-417.939148075108	-409.977267024635	0.00321057179446183	3.01324265891139e-08	ns	ns	0.501190742808722	ns	ns
IgG	mat_anemiaabnormal	log10_cb_mot_ratio	Measles	vaccine_antigens	-0.00560921151213338	-0.0152098312968805	0.00399140827261376	0.25109941302482	-1024.87590342401	-1013.9184358832	0.00113457647487603	0.00487741716709449	ns	ns	0.456636044831097	ns	ns
IgG3	malaria_placentariaYes	log10_cb_mot_ratio	Measles	vaccine_antigens	-0.0156714487667357	-0.0424935645145615	0.0111506669810902	0.251113799706478	-853.441265811	-842.400747983949	0.00110274185624148	0.0136280882161299	ns	ns	0.878898298972673	ns	ns
IgG3	hivload_cat1000/9999	log10_cb_mot_ratio	RSV	other_antigens	-0.0220576411657307	-0.0599918411401911	0.0158765588087297	0.251493026225617	-275.733415130491	-262.369270958181	0.0384921159508544	0.019127154632644	ns	ns	0.898855486806983	ns	ns
IgG3	age	log10_cb_mot_ratio	OSP	other_antigens	0.00299742904824765	-0.00214811831287753	0.00814297640937282	0.252532228361194	97.8071321381688	108.857871440185	0.00107199954812276	0.00261444611231752	ns	ns	0.450435546295748	ns	ns
IgG3	hivload_cat400/999	log10_cb	Pneumo	other_antigens	-0.0397454369601056	-0.108283426249877	0.0287925523296655	0.252952559630945	-156.561143134807	-142.880150892835	0.00445645396989025	0.0345843122329928	ns	ns	0.668978966154379	ns	ns
IgG2	hivload_cat>9999	log10_cb_mot_ratio	Pneumo	other_antigens	0.0311232752861693	-0.0226090605555554	0.0848556111278941	0.253195556640837	-231.445775144908	-218.272130203759	0.0114422251510727	0.0270798693654768	ns	ns	0.72703274040227	ns	ns
IgG	hivload_cat400/999	log10_cb_mot_ratio	Cp17	other_antigens	-0.0112492846220252	-0.0306692568688337	0.00817068762478334	0.253197249425107	-420.669765182414	-407.447810686708	0.0126315243303065	0.00978843298177013	ns	ns	0.951916457250942	ns	ns
IgG	treatmentmq_full	log10_cb	Measles	vaccine_antigens	-0.019616473776617	-0.0534274892785864	0.0141945417253523	0.25373182349171	-342.209942617162	-329.528006637009	0.00479060235784534	0.0171301583268945	ns	ns	0.507463646983421	ns	ns
IgG2	cd4_cells_cat<350	log10_cb	Rotavirus	other_antigens	-0.0282816620775185	-0.0771511156428755	0.0205877914878385	0.253866667134761	-147.885801046198	-139.784359948821	0.00288966094909937	0.0246544785191086	ns	ns	0.410748164017146	ns	ns
IgG1	graviditymultigravidae	log10_cb	MSP1_42_3D7	exposure_antigen	0.01865726682023	-0.0134625802227173	0.0507771138631774	0.253918333136277	-410.674572018229	-399.533373601701	0.00101422348295066	0.0163220845069798	ns	ns	0.540162883937524	ns	ns
IgG4	gest_age	log10_cb	Tetanus_toxin	vaccine_antigens	0.0244032541078914	-0.0176334191758401	0.0664399273916228	0.254162154373841	276.262282285545	287.302800112596	0.00104491466761347	0.0213584751184202	ns	ns	0.254162154373841	ns	ns
IgG2	mat_anemia_recatabnormal	log10_cb	Tetanus_toxin	vaccine_antigens	-0.0174847134862951	-0.047631137059628	0.0126617100870379	0.254591425458965	-438.953334744581	-427.923073337776	0.00104045997208768	0.0153169200957088	ns	ns	0.983731998679191	ns	ns
IgG1	malaria_placentariaYes	log10_cb_mot_ratio	MSP1_42_3D7	exposure_antigen	0.0119796730259685	-0.0086934005902264	0.0326527466421634	0.25501285909421	-1006.03255981536	-994.992041988311	0.00102892837735724	0.010503812360995	ns	ns	0.51002571818842	ns	ns
IgG4	hemoglobin	log10_cb_mot_ratio	Rotavirus	other_antigens	-0.00942964004103806	-0.0257085401806939	0.00684926009861781	0.255191074879234	-35.1905145267117	-24.1705447251972	0.00103277567239946	0.00827093126310345	ns	ns	0.469817973581259	ns	ns
IgG1	log10_pf_exposure	log10_cb	Pertussis_toxin	vaccine_antigens	0.070597616037566	-0.0513279414818341	0.192523173556966	0.255392694052334	-542.14773006551	-531.096990763494	0.00101826802641913	0.0619502217115025	ns	ns	0.510785388104667	ns	ns
IgG4	treatmentmq_full	log10_cb	Measles	vaccine_antigens	-0.0545791190148917	-0.148996527311958	0.0398382892821741	0.255452341615771	16.745857143112	29.405001038806	0.0184621981604697	0.0478340828944884	ns	ns	0.743637465442033	ns	ns
IgG	hivload_cat1000/9999	log10_cb_mot_ratio	Measles	vaccine_antigens	-0.0155568755796203	-0.0425540667722481	0.0114403156130075	0.255635607884471	-341.600581080372	-328.426936139224	0.00916293078346553	0.0136059674175463	ns	ns	0.436983125372463	ns	ns
IgG1	hivload_cat400/999	log10_cb	Measles	vaccine_antigens	-0.0345702001883576	-0.0945695195108562	0.0254291191341411	0.255997274004259	-186.897674511872	-173.216682269899	0.00521208791865879	0.0302756940306975	ns	ns	0.511994548008518	ns	ns
IgG4	treatmentmq_split	log10_cb_mot_ratio	Diphteria_toxin	vaccine_antigens	0.0195832277177422	-0.0143540630547842	0.0535205184902686	0.256268292169919	-338.247918942507	-325.634752564516	-0.000629843320468559	0.0171919977380814	ns	ns	0.687792430454292	ns	ns
IgG4	hivload_cat>9999	log10_cb_mot_ratio	Shiga_toxin	other_antigens	0.098499565930465	-0.0728220149038816	0.269821146764812	0.256823713866304	14.1155717423467	27.4797159146562	0.00269182192263162	0.086383642484454	ns	ns	0.581270651046693	ns	ns
IgG1	haart_2no	log10_cb_mot_ratio	Measles	vaccine_antigens	-0.0147478270012325	-0.0404485203489009	0.0109528663464359	0.25687798373082	-275.569746220917	-268.349588479125	0.00373988613949594	0.012914509695107	ns	ns	0.719258354446297	ns	ns
IgG4	weight_g	log10_cb	OSP	other_antigens	5.39382716320234e-05	-3.95047511208369e-05	0.000147381294384884	0.256883188875378	286.064910658871	297.17625808284	0.000970363822882292	4.74822601233191e-05	ns	ns	0.585136030903845	ns	ns
IgG	graviditymultigravidae	log10_cb_mot_ratio	Tetanus_toxin	vaccine_antigens	-0.00480009864835047	-0.0131167381541634	0.00351654085746247	0.256896262644598	-1187.9240629644	-1176.92478290006	0.00100780120906929	0.00422536764839438	ns	ns	0.437596187980104	ns	ns
IgG2	malaria_placentariaYes	log10_cb_mot_ratio	Shiga_toxin	other_antigens	-0.0121936953229998	-0.0333286739854557	0.00894128333945613	0.25708807109465	-986.425327453061	-975.405357651546	0.000997147465233716	0.0107381920316901	ns	ns	0.882944418650265	ns	ns
IgG3	age	log10_cb_mot_ratio	MSP1_42_3D7	exposure_antigen	-0.000480657219405793	-0.0013142804435377	0.000352966004726116	0.257391740740428	-972.414901248745	-961.364161946729	0.000981154134349849	0.000423562906822158	ns	ns	0.450435546295748	ns	ns
IgG1	cd4_cells	log10_cb	Shiga_toxin	other_antigens	-1.8549101355312e-05	-5.08436167863059e-05	1.37454140756818e-05	0.257427958128697	-361.014604001861	-352.913162904484	0.00271005344322894	1.62924767700468e-05	ns	ns	0.96362650283145	ns	ns
IgG	treatmentmq_split	log10_cb	Rotavirus	other_antigens	0.0110132924284852	-0.00812719725234496	0.0301537821093154	0.257666123821216	-545.587263052934	-532.882664122639	0.011970675170762	0.00969781258371154	ns	ns	0.825584244519686	ns	ns
IgG1	age_cat>30	log10_cb	Shiga_toxin	other_antigens	0.00904443303540964	-0.00665372422396269	0.024742590294782	0.257783755656524	-966.509994747223	-951.655063525185	0.00275821969217749	0.00797709905901944	ns	ns	0.491750206653386	ns	ns
IgG4	seasonrainy	log10_cb	Pertussis_toxin	vaccine_antigens	0.0343567376976786	-0.0253356190943157	0.0940490944896729	0.25823647403121	-24.4890781344055	-13.4383388323894	0.000965577361172421	0.0303296110592545	ns	ns	0.545991943733662	ns	ns
IgG4	motHIV+	log10_cb_mot_ratio	Cp17	other_antigens	0.0259689763092187	-0.0191616010934612	0.0710995537118987	0.258333976644684	-133.551120256932	-122.562238816524	0.000984278130151339	0.0229287873046591	ns	ns	0.401852852558397	ns	ns
IgG3	treatmentmq_full	log10_cb_mot_ratio	Diphteria_toxin	vaccine_antigens	0.00534736355341513	-0.00397536200744718	0.0146700891142774	0.259118047738254	-788.565230540828	-775.952064162836	0.00105813646953845	0.00472271867042634	ns	ns	0.906913167083888	ns	ns
IgG3	prematurityYes	log10_cb_mot_ratio	Tetanus_toxin	vaccine_antigens	-0.0514199280396887	-0.140942707405544	0.0381028513261671	0.259193984581829	-176.74153802373	-165.752656583322	0.000968159884246256	0.0454824397367391	ns	ns	0.725743156829121	ns	ns
IgG3	hivload_cat>9999	log10_cb_mot_ratio	Pertussis_toxin	vaccine_antigens	0.0555397347020266	-0.0417489554435037	0.152828424847557	0.260180522050281	-106.978390059593	-93.6142458872839	0.00955972495825508	0.0490548323590267	ns	ns	0.728505461740787	ns	ns
IgG2	malaria_placentariaYes	log10_cb	VSP5	other_antigens	-0.0618235581244437	-0.16974304788699	0.0460959316381026	0.260479047198422	-37.9091443005581	-26.82794788415	0.000914996072079455	0.0548360770790014	ns	ns	0.790475453233724	ns	ns
IgG4	hivload	log10_cb	RSV	other_antigens	-2.39530774850766e-07	-6.59476533743325e-07	1.80414984041794e-07	0.2607793365525	-7.71326582690701	0.442230786978271	0.00249586898985754	2.11904892410215e-07	ns	ns	0.862964663593065	ns	ns
IgG4	age_catbetween_20_30	log10_cb_mot_ratio	RSV	other_antigens	0.0161900895189298	-0.012093289986267	0.0444734690241266	0.260795208209944	-483.864830962596	-469.268934009951	0.00264657962185599	0.0143684082059249	ns	ns	0.331921174085384	ns	ns
IgG1	mat_anemia_recatabnormal	log10_cb	Tetanus_toxin	vaccine_antigens	-0.0128642106199525	-0.0353499630178149	0.00962154177790989	0.261126650389067	-623.269304098884	-612.147973304637	0.000891091921326859	0.0114260955314212	ns	ns	0.522253300778134	ns	ns
IgG	weight_g	log10_cb_mot_ratio	Pertussis_toxin	vaccine_antigens	3.06955050714161e-06	-2.30045384301433e-06	8.43955485729755e-06	0.261483657365016	-1371.02009137668	-1360.05211594422	0.000932179107363873	2.72817256168396e-06	ns	ns	0.998199734804688	ns	ns
IgG	malaria_placentariaYes	log10_cb_mot_ratio	Tetanus_toxin	vaccine_antigens	0.00842621717019619	-0.00631784177586177	0.0231702761162542	0.261587686975664	-1187.89877309821	-1176.89949303387	0.000920377387299776	0.00749089456542501	ns	ns	0.915556904414825	ns	ns
IgG2	treatmentmq_full	log10_cb_mot_ratio	HiB	vaccine_antigens	-0.00868215145541723	-0.0239024085969255	0.006538105686091	0.261754286860953	-624.063173485405	-611.404029589711	0.00504678412365678	0.00771094075672652	ns	ns	0.660799034706426	ns	ns
IgG2	hivload_cat1000/9999	log10_cb	Pertussis_toxin	vaccine_antigens	-0.0405558012694448	-0.111810561564763	0.0306989590258736	0.261767724653848	-137.115065119213	-123.478126025651	0.000956790845510702	0.0359515282991813	ns	ns	0.458066068101567	ns	ns
IgG1	graviditymultigravidae	log10_cb	Shiga_toxin	other_antigens	-0.00732629280994367	-0.0201534272855532	0.00550084166566586	0.261923797949765	-966.928831308905	-955.787632892376	0.000871079888808302	0.00651826182775249	ns	ns	0.540162883937524	ns	ns
IgG1	mat_anemia_recatabnormal	log10_cb_mot_ratio	Diphteria_toxin	vaccine_antigens	-0.00657662481928404	-0.0181117795216094	0.00495852988304132	0.262708063299889	-978.317132799659	-967.359665258853	0.000912692882779398	0.00586022182230334	ns	ns	0.612985481033075	ns	ns
IgG1	graviditymultigravidae	log10_cb	OSP	other_antigens	0.0166414065132002	-0.0125711480269762	0.0458539610533767	0.263167457910808	-468.169161462314	-457.027963045786	0.000849326557184393	0.0148447090433518	ns	ns	0.540162883937524	ns	ns
IgG2	hemoglobin	log10_cb	Measles	vaccine_antigens	0.00628968766634593	-0.00475665833485407	0.0173360336675459	0.263358787050933	-257.537421915778	-246.507160508973	0.000878554396504971	0.00561247335486923	ns	ns	0.50214154495553	ns	ns
IgG	mat_anemiaabnormal	log10_cb	Pneumo	other_antigens	-0.00717076662775133	-0.0197724863038435	0.00543095304834085	0.263671073427664	-888.855840788894	-877.794914719874	0.000863841507886653	0.00640300878950014	ns	ns	0.518157685280993	ns	ns
IgG2	mat_anemiaabnormal	log10_cb_mot_ratio	OSP	other_antigens	0.0133701253932071	-0.0101350734978419	0.0368753242842561	0.263825310764449	-518.162075420154	-507.173193979747	0.00088247941384656	0.0119419191365047	ns	ns	0.664696216361684	ns	ns
IgG	graviditymultigravidae	log10_cb	OSP	other_antigens	0.00864113529282895	-0.00655152080167461	0.0238337913873325	0.263906862714545	-856.761581731093	-845.650234307125	0.000844996501512596	0.00772001619159164	ns	ns	0.527813725429091	ns	ns
IgG3	cd4_cells	log10_cb	Pneumo	other_antigens	4.73531207535411e-05	-3.62378577118498e-05	0.000130944099218932	0.263981186921599	-151.786203024348	-143.68476192697	0.00238736073662338	4.21713735802274e-05	ns	ns	0.734020173749829	ns	ns
IgG3	cd4_cells_cat<350	log10_cb	VSP5	other_antigens	0.0396955752536535	-0.0304218977456443	0.109813048252951	0.264280080709634	-68.4615129500327	-60.3600718526555	0.00237287762895366	0.0353740344070642	ns	ns	0.593196648854904	ns	ns
IgG2	log10_pf_exposure	log10_cb	Pneumo	other_antigens	-0.0574828491414106	-0.158764550497298	0.0437988522144765	0.26486420923868	-635.754861041178	-624.818520348249	0.000879120691788304	0.0514527207968402	ns	ns	0.422597308113222	ns	ns
IgG3	age_catbetween_20_30	log10_cb	Diphteria_toxin	vaccine_antigens	0.0225673340875718	-0.0171910249900639	0.0623256931652075	0.264871525160326	-288.727372193047	-273.925597899485	-0.0024795224762626	0.0202023081079066	ns	ns	0.529743050320652	ns	ns
IgG3	weight_g_catlow	log10_cb_mot_ratio	OSP	other_antigens	-0.0663854706349712	-0.183407618188504	0.0506366769185617	0.265124445115621	98.513639494198	109.554157321249	0.000843798308255317	0.0594579549612819	ns	ns	0.545269335862328	ns	ns
IgG1	treatmentmq_split	log10_cb_mot_ratio	Pneumo	other_antigens	0.010022976510035	-0.00767908088489598	0.0277250339049659	0.265295170735831	-569.76273581264	-557.103591916946	-0.00313649549529416	0.00896827921995009	ns	ns	0.993358292267286	ns	ns
IgG1	age_catbetween_20_30	log10_cb	HiB	vaccine_antigens	-0.0264918546193627	-0.0732969572298785	0.020313247991153	0.266239384095337	-191.577277411085	-176.722346189047	-0.00174309906002734	0.023784252751624	ns	ns	0.532478768190675	ns	ns
IgG	age	log10_cb	Rotavirus	other_antigens	-0.000549566634143733	-0.00152099209962009	0.000421858831332623	0.266457711528012	-885.601313074765	-874.499982354593	0.000803219262223598	0.000493614632922626	ns	ns	0.414489773488018	ns	ns
IgG2	hivload	log10_cb	Measles	vaccine_antigens	-1.41111784801616e-07	-3.91512357794254e-07	1.09288788191023e-07	0.266481856910662	-123.268945589913	-115.140354985976	0.00224516806230779	1.26339394712237e-07	ns	ns	0.642365846109872	ns	ns
IgG3	treatmentmq_split	log10_cb	Pertussis_toxin	vaccine_antigens	0.0300932267181965	-0.0232438027735066	0.0834302562098995	0.267008109612542	-182.654286131869	-169.9271519307	-0.00374245225868597	0.0270250773745549	ns	ns	0.692235501606358	ns	ns
IgG3	graviditymultigravidae	log10_cb	HepB	vaccine_antigens	0.0204871378107785	-0.0157837311217173	0.0567580067432742	0.267216857531151	-337.397121331799	-326.28577390783	0.000787337097964524	0.0184307269051702	ns	ns	0.534433715062302	ns	ns
IgG	prematurityYes	log10_cb	Pertussis_toxin	vaccine_antigens	-0.0210391398059358	-0.0583323505475189	0.0162540709356473	0.267765115210736	-673.737901195768	-662.707639788963	0.000799676879601807	0.0189480894027691	ns	ns	0.419651453867655	ns	ns
IgG1	weight_g	log10_cb_mot_ratio	Pertussis_toxin	vaccine_antigens	4.50073463438104e-06	-3.48299726867552e-06	1.24844665374376e-05	0.26812150205611	-1169.08184417265	-1158.0413263456	0.000790597176566266	4.0564660779083e-06	ns	ns	0.659890332048338	ns	ns
IgG2	cd4_cells	log10_cb_mot_ratio	VSP5	other_antigens	4.10256719136612e-05	-3.21168275972145e-05	0.000114168171424537	0.26845760462892	-171.477048435229	-163.602129995376	0.00235432440707251	3.68667084320382e-05	ns	ns	0.84748213255106	ns	ns
IgG4	hivload_cat>9999	log10_cb_mot_ratio	Measles	vaccine_antigens	0.0937488790083067	-0.0734841668245204	0.260981924841134	0.268722618812653	8.78539354548498	22.0073480411918	0.0156230362628647	0.0842920597757774	ns	ns	0.581270651046693	ns	ns
IgG	cd4_cells	log10_cb_mot_ratio	HepB	vaccine_antigens	1.28114514474115e-05	-1.00570718756879e-05	3.5679974770511e-05	0.268831220253339	-389.228034606317	-381.534990031914	0.00249153505849997	1.15176294778976e-05	ns	ns	0.910948997127461	ns	ns
IgG	treatmentmq_full	log10_cb_mot_ratio	Measles	vaccine_antigens	-0.00649166359437747	-0.0180438228796601	0.00506049569090516	0.268873431481802	-712.314509899628	-699.701343521636	-0.0042587503342606	0.00585210816130653	ns	ns	0.739791850848392	ns	ns
IgG3	weight_g_catlow	log10_cb_mot_ratio	RSV	other_antigens	0.0189445901900052	-0.0147145801452043	0.0526037605252147	0.268886609204625	-631.687876381958	-620.647358554907	0.000777133893420379	0.0171019373312175	ns	ns	0.545269335862328	ns	ns
IgG	graviditymultigravidae	log10_cb_mot_ratio	Pneumo	other_antigens	-0.00401871109659024	-0.011160476886731	0.00312305469355057	0.26897839805832	-1269.09088275838	-1258.10200131798	0.000789307482063406	0.0036284053563229	ns	ns	0.437596187980104	ns	ns
IgG2	age_catbetween_20_30	log10_cb	OSP	other_antigens	0.0280180625500755	-0.0217867853294321	0.077822910429583	0.269141761651262	-155.583500680611	-140.781726387048	-0.00259929708231077	0.025307203452851	ns	ns	0.617661911815008	ns	ns
IgG4	treatmentmq_full	log10_cb_mot_ratio	Tetanus_toxin	vaccine_antigens	-0.0320902525500512	-0.0892341726144173	0.0250536675143149	0.269191692691852	-160.038273209882	-147.42510683189	-0.00449063069302813	0.0289480427614744	ns	ns	0.827458358011964	ns	ns
IgG	cd4_cells	log10_cb	VSP5	other_antigens	3.98810191418826e-05	-3.1326644282763e-05	0.000111088682566528	0.269316723672476	-185.171044442103	-177.152557938718	0.00219543788662047	3.59124041284776e-05	ns	ns	0.649117124408172	ns	ns
IgG1	weight_g	log10_cb	Cp17	other_antigens	1.38151259729902e-05	-1.07560043247262e-05	3.83862562707067e-05	0.269416460522221	-518.597769050613	-507.466487998489	0.00074443108506872	1.24859457793962e-05	ns	ns	0.628638407885182	ns	ns
IgG	haart_2no	log10_cb	Cp17	other_antigens	0.0284239871076411	-0.0224211399941538	0.0792691142094359	0.26944151622699	-170.909802610223	-163.546760721462	0.00276718303992096	0.0255681785853533	ns	ns	0.53888303245398	ns	ns
IgG3	hemoglobin	log10_cb_mot_ratio	Rotavirus	other_antigens	0.00206644288851368	-0.00161119410056473	0.0057440798775921	0.269683038368825	-903.568805316536	-892.538543909731	0.000765845790599573	0.00186854907567098	ns	ns	0.618689381824232	ns	ns
IgG1	seasonrainy	log10_cb	HepB	vaccine_antigens	-0.0277048890075358	-0.0770179238613507	0.0216081458462791	0.269741367118332	-136.397703118118	-125.388060349177	0.000770222813763599	0.0250544424339539	ns	ns	0.960650505676809	ns	ns
IgG3	mat_anemia_recatabnormal	log10_cb_mot_ratio	RSV	other_antigens	0.0122365812784866	-0.00955323941542927	0.0340264019724025	0.269956081013591	-628.533385699175	-617.503124292371	0.000761053808520762	0.0110710625974142	ns	ns	0.837740230813295	ns	ns
IgG4	seasonrainy	log10_cb_mot_ratio	Shiga_toxin	other_antigens	0.0335166031221982	-0.0262019069401416	0.0932351131845381	0.270214203358193	-28.7505361395416	-17.782560707082	0.000772789587891731	0.0303393423828404	ns	ns	0.341292770840117	ns	ns
IgG3	mat_anemia_recatabnormal	log10_cb	MSP1_42_3D7	exposure_antigen	0.0175623983694773	-0.0137558220097442	0.0488806187486987	0.270671003715041	-423.815767537499	-412.694436743252	0.000725628929196698	0.0159142986009712	ns	ns	0.892138663168501	ns	ns
IgG3	treatmentmq_split	log10_cb_mot_ratio	VSP5	other_antigens	0.0269696578425555	-0.021222171406302	0.075161487091413	0.270873670661751	-218.360401637011	-205.678465656859	-0.0038361258918298	0.0244161156605163	ns	ns	0.583051034366799	ns	ns
IgG2	graviditymultigravidae	log10_cb_mot_ratio	Shiga_toxin	other_antigens	-0.00664043414798031	-0.0184963305391408	0.00521546224318013	0.271212133277617	-986.35092439862	-975.330954597105	0.000741689160567605	0.00602370573395736	ns	ns	0.47462123323583	ns	ns
IgG2	log10_pf_exposure	log10_cb	Pertussis_toxin	vaccine_antigens	0.0996511611201848	-0.0784415697618619	0.277743892002231	0.271669698072785	-317.617875970064	-306.628994529656	0.000741523863750593	0.0904807911156452	ns	ns	0.422597308113222	ns	ns
IgG2	malaria_placentariaYes	log10_cb	RSV	other_antigens	-0.0190736592621772	-0.0531619550578355	0.0150146365334811	0.27171530582218	-709.780671273389	-698.689390813873	0.000715264244626201	0.0173211940963812	ns	ns	0.790475453233724	ns	ns
IgG2	treatmentmq_full	log10_cb_mot_ratio	VSP5	other_antigens	-0.0159064872421064	-0.044396978468135	0.0125840039839223	0.271937885844763	-397.455507140075	-384.912313391874	0.0191045982796768	0.0144308921349461	ns	ns	0.660799034706426	ns	ns
IgG2	hivload_cat1000/9999	log10_cb	MSP1_42_3D7	exposure_antigen	0.0986725607761142	-0.0784950900007369	0.275840211552965	0.272063777164357	67.400210372274	80.9927047287495	-0.00902778831488216	0.0893804968479372	ns	ns	0.458066068101567	ns	ns
IgG4	treatmentmq_split	log10_cb_mot_ratio	OSP	other_antigens	0.0652649456762564	-0.0517014387694966	0.182231330122009	0.272252443341674	89.8828444361111	102.496010814102	0.00631858775791416	0.0592529860530539	ns	ns	0.687792430454292	ns	ns
IgG3	motHIV+	log10_cb_mot_ratio	Cp17	other_antigens	0.00178146323653654	-0.0014065201196661	0.00496944659273918	0.272326268578099	-1688.10223462441	-1677.05149532239	0.000714691606406692	0.00161981031497772	ns	ns	0.460207902009566	ns	ns
IgG1	gest_age	log10_cb_mot_ratio	Tetanus_toxin	vaccine_antigens	0.0027538578042396	-0.00217829724349279	0.00768601285197199	0.272687934350508	-968.108951389722	-957.140975957263	0.000728787998873215	0.00250572796478346	ns	ns	0.932041401838394	ns	ns
IgG3	weight_g	log10_cb_mot_ratio	Diphteria_toxin	vaccine_antigens	3.58146078959024e-06	-2.83701326525248e-06	9.99993484443296e-06	0.273000314536695	-1277.33750344646	-1266.34862200606	0.000718116379922695	3.26093382565991e-06	ns	ns	0.477750550439216	ns	ns
IgG4	weight_g	log10_cb	HiB	vaccine_antigens	5.37843970118853e-05	-4.26471321829255e-05	0.000150215926206696	0.27325931316233	303.096105198696	314.217435992943	0.000682004150897919	4.90015119496595e-05	ns	ns	0.585136030903845	ns	ns
IgG4	malaria_placentariaYes	log10_cb	Pneumo	other_antigens	-0.0589376365211049	-0.164623794460085	0.0467485214178752	0.273310282309428	-50.2205405036855	-39.1494621407133	0.000692942800130103	0.0537005235719011	ns	ns	0.662389297629748	ns	ns
IgG2	age_cat>30	log10_cb_mot_ratio	Cp17	other_antigens	0.0105836737451916	-0.00839779900172079	0.0295651464921039	0.273351157495839	-826.279129006345	-811.627287085801	0.00182038810475948	0.00964347648993336	ns	ns	0.693564027730252	ns	ns
IgG3	log10_pf_exposure	log10_cb_mot_ratio	Shiga_toxin	other_antigens	-0.0729673323937869	-0.203838344412911	0.0579036796253378	0.273401635243331	-500.516434647092	-489.465695345076	0.000696208260017817	0.0664953958394119	ns	ns	0.546803270486662	ns	ns
IgG2	cd4_cells_cat<350	log10_cb	OSP	other_antigens	-0.0410059838147101	-0.114970739171771	0.0329587715423507	0.274248894381287	-56.7098434346777	-48.6084023373004	0.00190109471632804	0.0373149756970985	ns	ns	0.410748164017146	ns	ns
IgG3	haartno	log10_cb	Pneumo	other_antigens	-0.0364034058982942	-0.102041436019471	0.0292346242228827	0.274320049199655	-164.169595236934	-155.807120008587	0.00172985574751439	0.0331459627055197	ns	ns	0.480060086099395	ns	ns
IgG3	age	log10_cb	Measles	vaccine_antigens	0.00130709235436416	-0.00104166076629118	0.0036558454750195	0.274334007934786	-359.74214254922	-348.600944132692	0.000659550305181611	0.00119354699510584	ns	ns	0.495977009546686	ns	ns
IgG1	gest_age	log10_cb	VSP5	other_antigens	0.0100284354158248	-0.00799567007718937	0.028052540908839	0.274403734861948	-221.409360464054	-210.348434395034	0.000676705245418741	0.00915815530427954	ns	ns	0.533832308265212	ns	ns
IgG	hemoglobin	log10_cb	Diphteria_toxin	vaccine_antigens	0.00350889081482629	-0.0028066009734483	0.00982438260310087	0.275072714791682	-582.404920192892	-571.374658786087	0.000672357389392308	0.00320880129779893	ns	ns	0.42789088967595	ns	ns
IgG4	seasonrainy	log10_cb_mot_ratio	VSP5	other_antigens	0.035857244426966	-0.0287948839663618	0.100509372820294	0.275893362188392	13.922118453163	24.879585993969	0.000674930334148005	0.0328453170716956	ns	ns	0.341292770840117	ns	ns
IgG2	gest_age	log10_cb	OSP	other_antigens	-0.0112391214105282	-0.0315219865990804	0.00904374377802402	0.276352139460767	-150.34532649309	-139.315065086285	0.000650500462340164	0.0103054023854393	ns	ns	0.580009583472375	ns	ns
IgG	malaria_placentariaYes	log10_cb	Tetanus_toxin	vaccine_antigens	-0.0173436462415259	-0.0486455887473295	0.0139582962642776	0.276411976081491	-760.603937763756	-749.51265730424	0.000636062993327302	0.0159053718903086	ns	ns	0.756253953810215	ns	ns
IgG2	seasonrainy	log10_cb	HiB	vaccine_antigens	-0.0183643746352981	-0.0515366186594623	0.0148078693888661	0.276806879049688	-368.487895693996	-357.426969624976	0.000636052149249777	0.0168550146736825	ns	ns	0.791506185247737	ns	ns
IgG4	treatmentmq_split	log10_cb	Pneumo	other_antigens	-0.0401676860363346	-0.112846595782583	0.0325112237099133	0.276822856662781	-75.6739566895844	-63.0607903115933	-0.00448790435235091	0.0368177784237047	ns	ns	0.844116402752707	ns	ns
IgG4	hivload_cat>9999	log10_cb	RSV	other_antigens	-0.0833062657371797	-0.234431281505268	0.0678187500309089	0.276976734913029	-6.6823613415728	6.91013301490267	0.0106030190380499	0.076242073179135	ns	ns	0.841408390158349	ns	ns
IgG4	treatmentmq_full	log10_cb_mot_ratio	RSV	other_antigens	-0.0188373612976295	-0.052942137724001	0.015267415128742	0.277079381622056	-333.059885589351	-320.51669184115	0.0436277217171254	0.0172746179064047	ns	ns	0.827458358011964	ns	ns
IgG4	treatmentmq	log10_cb	Shiga_toxin	other_antigens	0.0507531059134693	-0.0413336129610342	0.142839824787973	0.277402757502177	20.5602175700543	29.0210622668694	0.00154542325285345	0.0465178442751282	ns	ns	0.964166868313074	ns	ns
IgG	prematurityYes	log10_cb	VSP5	other_antigens	-0.0233430084815503	-0.0655677519688294	0.0188817350057289	0.277478180317077	-605.212644384019	-594.161905082003	0.000626957416815066	0.0214543388110573	ns	ns	0.419651453867655	ns	ns
IgG	cd4_cells	log10_cb	Cp17	other_antigens	3.31586354326167e-05	-2.71545280141669e-05	9.34717988794002e-05	0.278193053317788	-220.17302388411	-212.126630202737	0.00175447916565086	3.04212885843869e-05	ns	ns	0.649117124408172	ns	ns
IgG2	motHIV+	log10_cb	Pneumo	other_antigens	-0.0104026140915953	-0.0292535061677953	0.00844827798460476	0.278331063686612	-637.140685418914	-626.110424012109	0.000616942198660153	0.00957783953912857	ns	ns	0.463461246945563	ns	ns
IgG	mat_anemia_recatabnormal	log10_cb_mot_ratio	MSP1_42_3D7	exposure_antigen	-0.00476640015459258	-0.0134142001404698	0.00388139983128463	0.278900139003166	-1157.21369616215	-1146.21441609782	0.000613830042271224	0.0043936176702827	ns	ns	0.481761316143861	ns	ns
IgG2	seasonrainy	log10_cb_mot_ratio	Cp17	other_antigens	0.00816881550406446	-0.00665441038126999	0.0229920413893989	0.278939485269241	-812.934992289222	-802.030623479714	0.000633444588261423	0.00753008384731558	ns	ns	0.557878970538483	ns	ns
IgG1	haart_2no	log10_cb	Pneumo	other_antigens	0.0241645378611336	-0.0199320516413394	0.0682611273636067	0.278989393501058	-192.694513899898	-185.296789543934	0.00217115866113005	0.022178394237839	ns	ns	0.542937966475083	ns	ns
IgG	mat_anemiaabnormal	log10_cb_mot_ratio	Rotavirus	other_antigens	-0.00349280102269124	-0.00983350230308097	0.00284790025769848	0.279170522764832	-1271.73838805672	-1260.74950661631	0.000611407896362381	0.00322142102732775	ns	ns	0.456636044831097	ns	ns
IgG1	graviditymultigravidae	log10_cb_mot_ratio	MSP1_42_3D7	exposure_antigen	-0.00637000218754415	-0.0179577416973959	0.0052177373223076	0.280179606861218	-1005.9020341703	-994.86151634325	0.000583807588267593	0.0058876316003742	ns	ns	0.485728627083475	ns	ns
IgG2	gest_age	log10_cb	Cp17	other_antigens	-0.00624134890628848	-0.0175981269022822	0.00511542908970524	0.280297944326329	-485.994182695637	-474.984539926695	0.000588026962930366	0.00577003101470659	ns	ns	0.580009583472375	ns	ns
IgG4	mat_anemia_recatabnormal	log10_cb	Shiga_toxin	other_antigens	0.0379161729913277	-0.0310843497366408	0.106916695719296	0.280395800099518	51.7124793741941	62.8338101684407	0.000564350576362616	0.0350624942611534	ns	ns	0.879298765455943	ns	ns
IgG	hivload_cat1000/9999	log10_cb_mot_ratio	VSP5	other_antigens	-0.0175940800536115	-0.0497939279928501	0.0146057678856272	0.280917723453726	-305.297427790551	-292.123782849403	0.0119307057495209	0.0162279875260083	ns	ns	0.436983125372463	ns	ns
IgG	motHIV+	log10_cb	HepB	vaccine_antigens	0.0112624062591757	-0.0092701912417736	0.0317950037601249	0.28123746846227	-591.297357820553	-580.246618518537	0.000564217255616173	0.0104325868454156	ns	ns	0.328110379872649	ns	ns
IgG	graviditymultigravidae	log10_cb_mot_ratio	Pertussis_toxin	vaccine_antigens	-0.00323995051534221	-0.00914798427612579	0.00266808324544137	0.281311835130067	-1376.60912811659	-1365.63068146931	0.000577128704590257	0.00300155764694901	ns	ns	0.437596187980104	ns	ns
IgG4	treatmentmq	log10_cb_mot_ratio	Diphteria_toxin	vaccine_antigens	-0.0122825820348876	-0.0347783231362159	0.0102131590664408	0.281575836924782	-306.44710122427	-298.318510620333	0.00155249656071832	0.0113502069119809	ns	ns	0.915696416545398	ns	ns
IgG3	haart_2no	log10_cb	Pneumo	other_antigens	-0.0345436309883973	-0.0979227875700247	0.0288355255932302	0.281576175800452	-129.575560990077	-122.177836634113	0.0020230770894013	0.0318765677116646	ns	ns	0.492758307650791	ns	ns
IgG4	haartno	log10_cb_mot_ratio	HepB	vaccine_antigens	-0.0299575601922252	-0.0848527977013007	0.0249376773168503	0.281815644416143	-199.22840807998	-191.099817476043	0.00154186704541115	0.0276973450842901	ns	ns	0.563631288832286	ns	ns
IgG3	hivload	log10_cb	HepB	vaccine_antigens	1.63329132378145e-07	-1.36045731054442e-07	4.62703995810732e-07	0.282005606878358	-84.3435657156655	-76.1614022595285	0.00150424852586384	1.51079877760218e-07	ns	ns	0.629149787274444	ns	ns
IgG	age_cat>30	log10_cb	Pertussis_toxin	vaccine_antigens	-0.013186205754591	-0.0372744462325599	0.010902034723378	0.282213580071169	-696.913180441446	-682.124806495424	0.0230777535651157	0.0122397225418114	ns	ns	0.372381054478496	ns	ns
IgG2	malaria_placentariaYes	log10_cb	Pneumo	other_antigens	-0.0206300689567357	-0.058325840256733	0.0170657023432615	0.282312661869187	-637.121220952193	-626.090959545388	0.000550321970487877	0.0191526240432352	ns	ns	0.790475453233724	ns	ns
IgG2	cd4_cells_cat<350	log10_cb_mot_ratio	Cp17	other_antigens	0.0105458873109678	-0.00882221901740791	0.0299139936393436	0.282621472054201	-334.143556845223	-326.26863840537	0.00165052222997641	0.00976229051049547	ns	ns	0.974992089493527	ns	ns
IgG1	graviditymultigravidae	log10_cb	Tetanus_toxin	vaccine_antigens	-0.0122593632193374	-0.034681650804899	0.0101629243662242	0.282818178265455	-628.48229290041	-617.341094483882	0.000521698170073415	0.0113941536621264	ns	ns	0.540162883937524	ns	ns
IgG	age_cat>30	log10_cb_mot_ratio	Rotavirus	other_antigens	-0.00475878009817125	-0.0134734272740666	0.00395586707772406	0.283365327134926	-1279.95652019736	-1265.27699650544	-0.0029097510802143	0.00442758018048784	ns	ns	0.396711457988897	ns	ns
IgG2	haart_2no	log10_cb	Diphteria_toxin	vaccine_antigens	0.0457169786203943	-0.0385205299355709	0.129954487176359	0.283566096223052	-84.0745701264812	-76.7115282377207	0.0019348122995928	0.0423600015402088	ns	ns	0.988425051929827	ns	ns
IgG	cd4_cells_cat<350	log10_cb	Diphteria_toxin	vaccine_antigens	0.0196149350415948	-0.0164790290677744	0.0557088991509641	0.283677214048532	-210.144714975173	-202.154397692837	0.00153439337592398	0.0182013520305741	ns	ns	0.661913499446574	ns	ns
IgG	seasonrainy	log10_cb_mot_ratio	HiB	vaccine_antigens	0.00295876420039439	-0.00246669557365415	0.00838422397444293	0.283969886125613	-1384.86716233648	-1373.94144112367	0.000542083722720577	0.00275617758174085	ns	ns	0.983074625956454	ns	ns
IgG4	prematurityYes	log10_cb_mot_ratio	Shiga_toxin	other_antigens	-0.0628810398025879	-0.178205928378879	0.0524438487737035	0.28407963157854	-30.8636902866904	-19.8748088462826	0.000528602185493554	0.0585913142104465	ns	ns	0.55829503087394	ns	ns
IgG	age_catbetween_20_30	log10_cb	HepB	vaccine_antigens	0.0129803009546788	-0.010841708308652	0.0368023102180097	0.284420458559493	-592.452303085255	-577.7179840159	0.00783409995541473	0.0121037597025676	ns	ns	0.442431824425878	ns	ns
IgG2	mat_anemiaabnormal	log10_cb_mot_ratio	HiB	vaccine_antigens	0.00432078275816269	-0.00361651342289227	0.0122580789392177	0.28486980701215	-1149.14223285502	-1138.13259008608	0.000511773487380296	0.00403269705137808	ns	ns	0.664696216361684	ns	ns
IgG1	treatmentmq_full	log10_cb	HiB	vaccine_antigens	0.041171520370925	-0.0346488671676458	0.116991907909496	0.285331032360942	-58.6275829028548	-45.9004487016864	-0.00430539071978164	0.0384170595799183	ns	ns	0.665772408842199	ns	ns
IgG1	motHIV+	log10_cb_mot_ratio	MSP1_42_3D7	exposure_antigen	-0.00549735655811494	-0.0156216690369872	0.0046269559207573	0.286100929214357	-1005.87345099429	-994.832933167237	0.000486306283274063	0.00514407680911301	ns	ns	0.445045889889	ns	ns
IgG2	haart_2no	log10_cb_mot_ratio	OSP	other_antigens	-0.0309680913722595	-0.0884983790930608	0.0265621963485418	0.287284878172969	-143.419598765107	-136.199441023315	0.00181822786320263	0.0289087710001407	ns	ns	0.699253999762386	ns	ns
IgG4	seasonrainy	log10_cb_mot_ratio	Measles	vaccine_antigens	0.0322822391994914	-0.0274151462612509	0.0919796246602337	0.288024005123235	-32.5464623110589	-21.6313983030577	0.000475323606469069	0.0303262842997945	ns	ns	0.341292770840117	ns	ns
IgG3	age_cat>30	log10_cb_mot_ratio	Cp17	other_antigens	0.0024271425238429	-0.00206120131070013	0.00691548635838594	0.288071607179913	-1686.17838661507	-1671.44406754572	-0.00245958743466956	0.00228048921630776	ns	ns	0.647685416485307	ns	ns
IgG4	hemoglobin	log10_cb_mot_ratio	Measles	vaccine_antigens	-0.00890542204725392	-0.0253924982851505	0.0075816541906426	0.288595897408903	-30.3086212555745	-19.3406458231149	0.000457290568112501	0.00837608055444401	ns	ns	0.469817973581259	ns	ns
IgG3	cd4_cells_cat<350	log10_cb_mot_ratio	Shiga_toxin	other_antigens	-0.0274429124800025	-0.0784870316519813	0.0236012066919762	0.288733342818461	-137.329268848721	-129.425081884033	0.00134579242081367	0.0257313713885234	ns	ns	0.83290905746926	ns	ns
IgG2	hemoglobin	log10_cb_mot_ratio	Shiga_toxin	other_antigens	0.00171583475989223	-0.00146635841955179	0.00489802793933625	0.289452357122839	-978.474993192907	-967.475713128569	0.000438443957837098	0.00161675110505463	ns	ns	0.675388833286625	ns	ns
IgG2	treatmentmq_full	log10_cb	RSV	other_antigens	-0.0150878414576082	-0.0431270764109397	0.0129513934957234	0.289668021245532	-409.004699321879	-396.345555426185	-0.0042380516113707	0.0142053368467367	ns	ns	0.697776092460923	ns	ns
IgG1	age_cat>30	log10_cb	Cp17	other_antigens	-0.0175959839185831	-0.0502716824712056	0.0150797146340395	0.290123080932197	-522.258482134891	-507.403550912853	0.00810467274176152	0.0166043236712581	ns	ns	0.491750206653386	ns	ns
IgG2	age_cat>30	log10_cb	Rotavirus	other_antigens	0.02111145099641	-0.0180937760266847	0.0603166780195047	0.290128133099611	-411.860043265325	-397.0449133667	-0.000392319767197558	0.019921521962741	ns	ns	0.994509594136415	ns	ns
IgG2	weight_g_catlow	log10_cb_mot_ratio	Cp17	other_antigens	0.0126981191000061	-0.0108936606812624	0.0362898988812745	0.290298040380319	-823.273630681384	-812.295184034105	0.000427809553586567	0.0119857282261386	ns	ns	0.448580602299618	ns	ns
IgG	prematurityYes	log10_cb	HiB	vaccine_antigens	-0.0184887589010379	-0.0528373171463733	0.0158597993442975	0.290302981787787	-726.603093753805	-715.552354451789	0.00041717294965371	0.0174524590419069	ns	ns	0.419651453867655	ns	ns
IgG4	haart_2no	log10_cb	Pneumo	other_antigens	-0.0798569803695181	-0.229123818330822	0.0694098575917858	0.290424726663557	19.0563866628914	26.4194285516519	0.00154905892510515	0.0750609033236321	ns	ns	0.337043665263386	ns	ns
IgG2	treatmentmq_split	log10_cb_mot_ratio	Shiga_toxin	other_antigens	-0.00899600036389192	-0.0257453487841945	0.00775334805641063	0.290575181833928	-590.36460802859	-577.682672048438	-0.00306091871474456	0.00848596192845466	ns	ns	0.764445978781164	ns	ns
IgG2	age	log10_cb_mot_ratio	Cp17	other_antigens	0.000561358474873203	-0.000482465234315575	0.00160518218406198	0.290707347623438	-826.866500821687	-815.877619381279	0.000419630531908632	0.000530319202389124	ns	ns	0.571647546223914	ns	ns
IgG3	treatmentmq_split	log10_cb_mot_ratio	OSP	other_antigens	0.0495991110232022	-0.0429304638263941	0.142128685872798	0.2915255171834	11.2628674000781	23.9448033802307	-0.00458031614865528	0.0468795818037909	ns	ns	0.583051034366799	ns	ns
IgG4	motHIV+	log10_cb_mot_ratio	HepB	vaccine_antigens	0.0145042950985155	-0.0125212908152169	0.0415298810122479	0.291699988636898	-428.904183246147	-417.904903181809	0.000402130394855038	0.0137306704611848	ns	ns	0.408379984091658	ns	ns
IgG2	malaria_placentariaYes	log10_cb_mot_ratio	Pneumo	other_antigens	0.0195599799176376	-0.0169044367702561	0.0560243966055314	0.291904992657475	-657.02052450879	-646.126889163326	0.000413709694856657	0.018523348646361	ns	ns	0.882944418650265	ns	ns
IgG1	age_catbetween_20_30	log10_cb_mot_ratio	OSP	other_antigens	0.00541358659374725	-0.00468006624662689	0.0155072394341214	0.292031647658974	-1096.83666149867	-1082.10234242932	0.00465245648021551	0.00512849890832193	ns	ns	0.371676642475057	ns	ns
IgG2	mat_anemia_recatabnormal	log10_cb	MSP1_42_3D7	exposure_antigen	0.0411523077725137	-0.0355935019719887	0.117898117517016	0.292151050978563	106.76868957457	117.839767937542	0.000385188417040938	0.0389955529238635	ns	ns	0.983731998679191	ns	ns
IgG3	age_cat>30	log10_cb	MSP1_42_3D7	exposure_antigen	0.020430244863288	-0.0176829534343271	0.058543443160903	0.292330330141746	-428.977510519609	-414.122579297572	0.00812132153384215	0.0193674170319964	ns	ns	0.733015097800292	ns	ns
IgG1	treatmentmq_split	log10_cb	OSP	other_antigens	0.0222137090682337	-0.0192968170298618	0.0637242351663293	0.292356498962046	-271.897715777926	-259.170581576758	0.0084939520881876	0.0210327644855817	ns	ns	0.894442691115742	ns	ns
IgG2	weight_g	log10_cb	MSP1_42_3D7	exposure_antigen	3.75974261858614e-05	-3.25496165432869e-05	0.00010774446891501	0.292366458779723	106.329278698711	117.410475115119	0.000380480876209455	3.56431322129411e-05	ns	ns	0.341094201909676	ns	ns
IgG1	hivload_cat>9999	log10_cb_mot_ratio	Cp17	other_antigens	-0.0166216322091876	-0.0477773230026241	0.0145340585842489	0.292464246563933	-351.026743954809	-337.709548484249	0.0180324249874998	0.0157074692560697	ns	ns	0.536509225122803	ns	ns
IgG	age_cat>30	log10_cb	RSV	other_antigens	0.00724921915932701	-0.006282083610736	0.02078052192939	0.292585114233104	-1042.25598484059	-1027.46761089457	0.00800205202107018	0.00687552881607483	ns	ns	0.372381054478496	ns	ns
IgG3	prematurityYes	log10_cb	Shiga_toxin	other_antigens	-0.0390244156173475	-0.111890863092321	0.0338420318576262	0.292743520132909	-287.120360050028	-276.03916363362	0.000374605322016053	0.0370249168060595	ns	ns	0.585487040265818	ns	ns
IgG3	seasonrainy	log10_cb_mot_ratio	Measles	vaccine_antigens	0.00794503644832317	-0.0068951190396624	0.0227851919363087	0.292863809912205	-822.633965157457	-811.676497616651	0.000389068656037383	0.00753926629345823	ns	ns	0.774840744563521	ns	ns
IgG1	weight_g	log10_cb_mot_ratio	Pneumo	other_antigens	6.13210300074284e-06	-5.32202183635043e-06	1.75862278378361e-05	0.292895131333257	-958.031927487039	-947.022284718098	0.000381592153784083	5.81948996270454e-06	ns	ns	0.659890332048338	ns	ns
IgG3	mat_anemia_recatabnormal	log10_cb_mot_ratio	HepB	vaccine_antigens	-0.00874478257714146	-0.0250925468157993	0.00760298166151634	0.293282964716679	-792.087375574488	-781.09849413408	0.000378129966973617	0.00830555314616114	ns	ns	0.837740230813295	ns	ns
IgG2	cd4_cells_cat<350	log10_cb	Tetanus_toxin	vaccine_antigens	-0.0257779962846986	-0.0741804292142142	0.022624436644817	0.293391545726533	-148.85594807606	-140.837461572674	0.00108502477110861	0.0244109643339971	ns	ns	0.410748164017146	ns	ns
IgG1	log10_mother	log10_cb_mot_ratio	Shiga_toxin	other_antigens	-0.0233499339674409	-0.0670090632648056	0.0203091953299237	0.293395607688767	-1531.92696610533	-1520.87622680331	0.000368335945035492	0.022183148428684	ns	ns	0.342294875636895	ns	ns
IgG	mat_anemiaabnormal	log10_cb_mot_ratio	Tetanus_toxin	vaccine_antigens	-0.00387401660248109	-0.0111203244101252	0.003372291205163	0.293551743105705	-1192.38339356567	-1181.40494691839	0.000375182523076778	0.00368146349409075	ns	ns	0.456636044831097	ns	ns
IgG3	mat_anemiaabnormal	log10_cb	Pneumo	other_antigens	-0.0153156561350771	-0.0439760976817144	0.0133447854115602	0.293819237702427	-406.523248210694	-395.401917416447	0.000352949644752631	0.0145637529618854	ns	ns	0.978444511877193	ns	ns
IgG4	treatmentmq_split	log10_cb_mot_ratio	Rotavirus	other_antigens	0.0433454143877682	-0.037908811981997	0.124599640757534	0.293847542978648	-34.4779432510419	-21.7960072708893	-0.00302403132862006	0.0411669907507608	ns	ns	0.687792430454292	ns	ns
IgG2	treatmentmq_full	log10_cb_mot_ratio	Tetanus_toxin	vaccine_antigens	-0.0176043684896524	-0.0506663443394555	0.0154576073601507	0.294634500350268	-344.806185217768	-332.334209968101	-0.00524912958388035	0.0167441868347272	ns	ns	0.660799034706426	ns	ns
IgG4	treatmentmq_split	log10_cb_mot_ratio	Shiga_toxin	other_antigens	0.0420933868573632	-0.0369649073172611	0.121151681031987	0.294768184480411	-44.1218123585588	-31.4398763784062	0.00168245670056177	0.0400544342179439	ns	ns	0.687792430454292	ns	ns
IgG	treatmentmq_split	log10_cb	OSP	other_antigens	0.0115134160152691	-0.0101134248348151	0.0331402568653533	0.294851515899888	-504.013938216608	-491.28680401544	-0.00453777433614699	0.0109579977158576	ns	ns	0.825584244519686	ns	ns
IgG3	cd4_cells_cat<350	log10_cb	Measles	vaccine_antigens	0.0267719613820284	-0.0236453058508124	0.0771892286148692	0.294896754045853	-141.025939157975	-132.924498060598	0.000988568147611391	0.0254353454212835	ns	ns	0.593196648854904	ns	ns
IgG4	age_catbetween_20_30	log10_cb_mot_ratio	Rotavirus	other_antigens	0.0327172463298337	-0.0286755724545336	0.0941100651142011	0.295109215381288	-35.8376022752539	-21.1169118391856	-0.00113920612695861	0.0311927183495923	ns	ns	0.344294084611503	ns	ns
IgG3	hivload_cat400/999	log10_cb	HepB	vaccine_antigens	0.0506270945659617	-0.0448525325238953	0.146106721655819	0.295620628321706	-84.4995797110921	-70.8626406175304	0.0199012497919794	0.0481741640992062	ns	ns	0.668978966154379	ns	ns
IgG3	motHIV+	log10_cb_mot_ratio	Shiga_toxin	other_antigens	0.0127862282277299	-0.0112431083849738	0.0368155648404336	0.29584793700615	-500.408735902402	-489.357996600386	0.000330073978276335	0.012209275569648	ns	ns	0.460207902009566	ns	ns
IgG2	hemoglobin	log10_cb	Rotavirus	other_antigens	0.00458053671919525	-0.00402881804827693	0.0131898914866674	0.295924300522856	-408.758637939986	-397.66735748047	0.000324282048204894	0.00437464829177479	ns	ns	0.50214154495553	ns	ns
IgG	mat_anemiaabnormal	log10_cb	MSP1_42_3D7	exposure_antigen	0.0129624101036396	-0.011409488446438	0.0373343086537171	0.296090105874853	-501.911326593803	-490.820046134287	0.000321745367567017	0.012384027286485	ns	ns	0.518157685280993	ns	ns
IgG4	hemoglobin	log10_cb	Rotavirus	other_antigens	-0.0127509946005788	-0.0367643608109727	0.0112623716098151	0.296884488722796	210.593712257956	221.715043052203	0.000306392933411948	0.0122023498033824	ns	ns	0.772752124719545	ns	ns
IgG	hivload_cat>9999	log10_cb_mot_ratio	Shiga_toxin	other_antigens	-0.00874254664902572	-0.0252837949981676	0.00779870170011619	0.296928519936568	-477.002377369726	-463.732575618938	0.0129685816879129	0.00833845331070429	ns	ns	0.620673217981292	ns	ns
IgG	age	log10_cb	MSP1_42_3D7	exposure_antigen	0.000971492198923149	-0.000860640736226654	0.00280362513407295	0.297556570296322	-506.688977191718	-495.57762976775	0.000297300281184909	0.000930982432335968	ns	ns	0.416579198414851	ns	ns
IgG	treatmentmq	log10_cb_mot_ratio	Rotavirus	other_antigens	-0.00524992690042579	-0.0151948304401813	0.00469497663932975	0.29782766988998	-498.069395460878	-489.860800115694	0.000831612159797879	0.00501920107326064	ns	ns	0.749228892731312	ns	ns
IgG	weight_g_catlow	log10_cb	HepB	vaccine_antigens	-0.0190913986809065	-0.0551231447914584	0.0169403474296453	0.297895903386449	-591.77257650779	-580.732058680739	0.000299497518592373	0.0183074228443593	ns	ns	0.875643903590654	ns	ns
IgG	prematurityYes	log10_cb	Cp17	other_antigens	-0.0192733102140374	-0.0556497220124922	0.0171031015844174	0.297913652408789	-690.574606653745	-679.534088826694	0.000299223549596328	0.0184825445403499	ns	ns	0.419651453867655	ns	ns
IgG2	motHIV+	log10_cb	RSV	other_antigens	-0.00896468425694965	-0.0258848349461085	0.00795546643220923	0.297939373036433	-709.654944657343	-698.563664197826	0.000293575670236024	0.00859759067991504	ns	ns	0.463461246945563	ns	ns
IgG1	haartno	log10_cb	HiB	vaccine_antigens	-0.0325912082823142	-0.0943697092283738	0.0291872926637454	0.298301055332291	-178.713555066386	-170.35107983804	0.000767310020508449	0.0311969735316653	ns	ns	0.508659371791466	ns	ns
IgG	hivload_cat>9999	log10_cb_mot_ratio	Measles	vaccine_antigens	-0.0163691627280035	-0.0474344034436175	0.0146960779876104	0.298319322836573	-341.600581080372	-328.426936139224	0.00916293078346553	0.0156561714135023	ns	ns	0.620673217981292	ns	ns
IgG3	treatmentmq_split	log10_cb	Shiga_toxin	other_antigens	0.0277772756643656	-0.0248137641908393	0.0803683155195706	0.298658203907124	-187.668569933522	-174.941435732353	-0.00364144207246109	0.0266470955514369	ns	ns	0.692235501606358	ns	ns
IgG4	hivload_cat>9999	log10_cb_mot_ratio	VSP5	other_antigens	0.0976934036025037	-0.0879645011199309	0.283351308324938	0.299115571929573	31.3133346906588	44.6774788629684	-0.00668094281409415	0.0936122932548866	ns	ns	0.581270651046693	ns	ns
IgG3	mat_anemia_recatabnormal	log10_cb_mot_ratio	Shiga_toxin	other_antigens	-0.0144709097922392	-0.0418560468111999	0.0129142272267216	0.299192939576177	-495.05580479046	-484.025543383655	0.000280537836175987	0.0139139541547643	ns	ns	0.837740230813295	ns	ns
IgG2	mat_anemia_recatabnormal	log10_cb_mot_ratio	Cp17	other_antigens	0.00805811592015212	-0.00719388520615622	0.0233101170464605	0.2992509690295	-821.644899865403	-810.676924432943	0.000285817156094326	0.00774861401785624	ns	ns	0.667499276831766	ns	ns
IgG	weight_g_catlow	log10_cb	OSP	other_antigens	-0.0125122370351855	-0.0361946527478567	0.0111701786774858	0.299300099855021	-854.323997281996	-843.222666561824	0.000272031657311045	0.0120338485598572	ns	ns	0.875643903590654	ns	ns
IgG2	haart_2no	log10_cb_mot_ratio	Shiga_toxin	other_antigens	0.0141993240209577	-0.0128762690951199	0.0412749171370353	0.299680285612451	-265.615278481498	-258.469198577476	0.00113885333901043	0.0136000366578829	ns	ns	0.699253999762386	ns	ns
IgG	prematurityYes	log10_cb	MSP1_42_3D7	exposure_antigen	-0.0268993148714352	-0.0778623920064709	0.0240637622636005	0.299751038476896	-494.612781439497	-483.562042137481	0.000270005140047824	0.0258942750957978	ns	ns	0.419651453867655	ns	ns
IgG	log10_pf_exposure	log10_cb_mot_ratio	Pertussis_toxin	vaccine_antigens	-0.0151922560999755	-0.043984327495292	0.0135998152953411	0.29987411392762	-1376.52238526432	-1365.54393861704	0.000275017579794978	0.0146277197401547	ns	ns	0.419823759498668	ns	ns
IgG1	graviditymultigravidae	log10_cb	HiB	vaccine_antigens	-0.0242673901826791	-0.0702555482994119	0.0217207679340536	0.299905938317131	-193.17523074225	-182.034032325722	0.000259288149903947	0.0233694326781197	ns	ns	0.540162883937524	ns	ns
IgG3	age	log10_cb	Rotavirus	other_antigens	0.00157176465727873	-0.00140738046684776	0.00455090978140521	0.299996137738176	-215.664559097813	-204.523360681285	0.000257953931868671	0.00151388823270334	ns	ns	0.495977009546686	ns	ns
IgG1	treatmentmq	log10_cb	Cp17	other_antigens	0.0198676883758027	-0.0179331508520716	0.057668527603677	0.300186101399602	-200.258839922016	-191.797995225201	0.000670661126868421	0.0190951917297411	ns	ns	0.807774120007965	ns	ns
IgG	motHIV+	log10_cb_mot_ratio	HiB	vaccine_antigens	-0.002629033433698	-0.00761736300710591	0.0023592961397099	0.300451106734915	-1410.58884998104	-1399.5792072121	0.000263109255170813	0.00253441745187722	ns	ns	0.323562730329909	ns	ns
IgG4	age_cat>30	log10_cb	Diphteria_toxin	vaccine_antigens	-0.0299026645643831	-0.0866712231323012	0.026865894003535	0.300744239190978	-189.455675586056	-174.667301640035	0.00901664456240869	0.0288452536251198	ns	ns	0.979722446570148	ns	ns
IgG1	hemoglobin	log10_cb_mot_ratio	Rotavirus	other_antigens	0.00163941424706173	-0.00147465162563988	0.00475348011976334	0.300992459819284	-1000.71206406385	-989.681802657047	0.00025292508191177	0.00158220752219302	ns	ns	0.601984919638568	ns	ns
IgG	treatmentmq	log10_cb	VSP5	other_antigens	0.0190523606155157	-0.0172699852452847	0.0553747064763161	0.30108136313665	-208.119788626331	-199.73241698954	0.000655885601399397	0.0183436938169975	ns	ns	0.708612061196668	ns	ns
IgG1	seasonrainy	log10_cb_mot_ratio	Rotavirus	other_antigens	0.00545682651475658	-0.00493113675087111	0.0158447897803843	0.302024719147326	-1029.17525633459	-1018.20728090213	0.000242455689670185	0.00527749225235607	ns	ns	0.704724344677094	ns	ns
IgG1	prematurityYes	log10_cb_mot_ratio	Cp17	other_antigens	-0.0117803242705171	-0.0342082889380751	0.0106476403970408	0.3020759469591	-970.703307504573	-959.724860857294	0.000240767170625267	0.0113944556817296	ns	ns	0.886544098827234	ns	ns
IgG2	age	log10_cb_mot_ratio	Shiga_toxin	other_antigens	-0.000421979429911766	-0.00122560998875297	0.000381651128929439	0.302239583504653	-986.203337250462	-975.183367448947	0.000234764456122027	0.000408306031493693	ns	ns	0.571647546223914	ns	ns
IgG3	age_cat>30	log10_cb_mot_ratio	RSV	other_antigens	-0.0141221334783702	-0.0410238512842691	0.0127795843275287	0.302374871173767	-633.243043252096	-618.508724182742	-0.00134543131345932	0.0136685333428233	ns	ns	0.647685416485307	ns	ns
IgG1	hivload_cat400/999	log10_cb_mot_ratio	Rotavirus	other_antigens	-0.00988778354434659	-0.0288142168178505	0.00903864972915733	0.30257184631233	-432.656726520837	-419.292582348528	-0.00661711529427622	0.00954307237559919	ns	ns	0.867019215582167	ns	ns
IgG2	weight_g	log10_cb_mot_ratio	Tetanus_toxin	vaccine_antigens	-1.06394955841949e-05	-3.09408631203543e-05	9.66187195196442e-06	0.303134473906193	-602.732014520447	-591.806293307633	0.000228652381720873	1.03132594124996e-05	ns	ns	0.858379611398986	ns	ns
IgG	treatmentmq	log10_cb	Pertussis_toxin	vaccine_antigens	0.0131930974508292	-0.0120956017221684	0.0384817966238268	0.30369088337	-295.742063833364	-287.354692196573	0.000559051213792516	0.0127714260647538	ns	ns	0.708612061196668	ns	ns
IgG1	mat_anemia_recatabnormal	log10_cb	Pneumo	other_antigens	0.0108778982754157	-0.00990104989056645	0.0316568464413979	0.303734435186761	-668.884657317152	-657.773309893184	0.000205266324123654	0.0105586419706861	ns	ns	0.531535261576832	ns	ns
IgG	log10_pf_exposure	log10_cb	HepB	vaccine_antigens	-0.061059275752678	-0.177895284505119	0.0557767329997634	0.304504002466759	-571.419595754545	-560.462128213739	0.000204894888859886	0.0593563715260669	ns	ns	0.609008004933518	ns	ns
IgG4	log10_pf_exposure	log10_cb	Pertussis_toxin	vaccine_antigens	-0.149429383256731	-0.435580887931258	0.136722121417796	0.304909190098615	-40.4277926498209	-29.3872748227697	0.000192844762708311	0.145391138624062	ns	ns	0.629024995880903	ns	ns
IgG1	seasonrainy	log10_cb	VSP5	other_antigens	0.0222305483265321	-0.0203433873510244	0.0648044840040887	0.304954473035532	-221.26594819223	-210.20502212321	0.000190772819993579	0.021632070174056	ns	ns	0.960650505676809	ns	ns
IgG1	gest_age	log10_cb	Tetanus_toxin	vaccine_antigens	-0.00488428385355193	-0.0142400162038354	0.00447144849673155	0.305047033294407	-608.284641313885	-597.223715244865	0.000189396127868613	0.00475370330485343	ns	ns	0.533832308265212	ns	ns
IgG2	seasonrainy	log10_cb	Pneumo	other_antigens	0.0109981858247468	-0.010071643981034	0.0320680156305276	0.305084714226618	-626.474752636442	-615.496305989163	0.000194480195935709	0.0107044596111224	ns	ns	0.791506185247737	ns	ns
IgG4	seasonrainy	log10_cb	HiB	vaccine_antigens	0.0534651476172978	-0.0489838580739023	0.155914153308498	0.30522102424325	293.125698094178	304.176437396194	0.000187490414476188	0.0520542103380005	ns	ns	0.545991943733662	ns	ns
IgG2	age_catbetween_20_30	log10_cb_mot_ratio	Tetanus_toxin	vaccine_antigens	0.011858374483399	-0.0108691041299422	0.0345858530967401	0.30527037460618	-603.597400705068	-589.015613114496	-0.00315824145393417	0.0115457435226438	ns	ns	0.534223155560815	ns	ns
IgG2	motHIV+	log10_cb_mot_ratio	Diphteria_toxin	vaccine_antigens	-0.00803157494632556	-0.0234609908106506	0.00739784091799952	0.306389603519197	-732.335322060864	-721.452458719792	0.000180704172764945	0.00783777533101723	ns	ns	0.428945444926876	ns	ns
IgG1	hivload_cat>9999	log10_cb_mot_ratio	MSP1_42_3D7	exposure_antigen	-0.0156927638083221	-0.0459817217877963	0.0145961941711522	0.306576700070173	-356.694887878096	-343.330743705787	-0.00419341355935643	0.0152722762922405	ns	ns	0.536509225122803	ns	ns
IgG	age	log10_cb_mot_ratio	RSV	other_antigens	-0.000172570854569497	-0.00050433871345661	0.000159197004317616	0.306782063351317	-1484.09689624486	-1473.11844959758	0.000168626945187378	0.000168553599078019	ns	ns	0.655035988843007	ns	ns
IgG3	age_catbetween_20_30	log10_cb_mot_ratio	OSP	other_antigens	0.0401774559568931	-0.0371034291565842	0.117458341070371	0.307054330471912	100.060769428304	114.795088497659	-0.00322586435514527	0.0392657585124485	ns	ns	0.578264601131178	ns	ns
IgG4	hemoglobin	log10_cb_mot_ratio	HepB	vaccine_antigens	-0.00437633911668916	-0.0127978125848398	0.00404513435146147	0.307238172518242	-423.874470322306	-412.896023675027	0.000161711171789536	0.00427850264747864	ns	ns	0.469817973581259	ns	ns
IgG1	cd4_cells_cat<350	log10_cb_mot_ratio	MSP1_42_3D7	exposure_antigen	-0.00967349406585351	-0.0283919075701369	0.0090449194384299	0.307730705962472	-343.984888940544	-336.080701975855	0.000499548916806813	0.00943596358397103	ns	ns	0.608544716357413	ns	ns
IgG	graviditymultigravidae	log10_cb	HepB	vaccine_antigens	0.0122414840838759	-0.0113425326043031	0.0358255007720549	0.307830011305656	-591.175182222963	-580.124442920947	0.000148802156819339	0.0119830090786995	ns	ns	0.538702519784898	ns	ns
IgG3	treatmentmq	log10_cb	Cp17	other_antigens	-0.0206746932935565	-0.0606419082044442	0.0192925216173312	0.307847390690868	-186.438249636938	-177.977404940123	0.00039526723720118	0.0201895420106017	ns	ns	0.718310578278693	ns	ns
IgG2	hivload_cat>9999	log10_cb_mot_ratio	Tetanus_toxin	vaccine_antigens	0.0256373001902793	-0.0240350976788001	0.0753096980593587	0.30834814353745	-246.088006412259	-232.818204661472	0.0236541386839818	0.0250398858489742	ns	ns	0.72703274040227	ns	ns
IgG1	weight_g_catlow	log10_cb	Shiga_toxin	other_antigens	-0.0103307357515588	-0.0302599694318714	0.00959849792875382	0.308501180925245	-966.85476190287	-955.723480850746	0.000134904253316526	0.0101271422251351	ns	ns	0.771526108501144	ns	ns
IgG	treatmentmq_split	log10_cb_mot_ratio	Diphteria_toxin	vaccine_antigens	0.00386056844284171	-0.00360091731517058	0.011322054200854	0.308513564749695	-855.394619625997	-842.827965399987	0.0214394891392705	0.00377952675943794	ns	ns	0.921881306888525	ns	ns
IgG1	graviditymultigravidae	log10_cb	VSP5	other_antigens	0.0233712565883698	-0.0217296103313248	0.0684721235080644	0.308664505107157	-204.981603085559	-193.840404669031	0.000132089559332749	0.022918545042167	ns	ns	0.540162883937524	ns	ns
IgG1	prematurityYes	log10_cb	Pneumo	other_antigens	0.0200840472763602	-0.0187059060992402	0.0588740006519606	0.30904366897307	-659.445681268327	-648.374602905355	0.000129977978627682	0.0197096842786362	ns	ns	0.480734596180331	ns	ns
IgG3	weight_g	log10_cb	Pertussis_toxin	vaccine_antigens	1.81379800163552e-05	-1.69303290921496e-05	5.32062891248601e-05	0.309576058724296	-303.739470654861	-292.608189602736	0.000119553838430542	1.78201409865378e-05	ns	ns	0.685378058215251	ns	ns
[truncated: 2,158 more rows]
